# Supplementary material for: Fungal community profiles in agricultural soils of a long-term field trial under different tillage, fertilization and crop rotation conditions analyzed by high-throughput ITS-amplicon sequencing
Source: PubMed Central journal article supplement (PMC5886558; doi:10.1371/journal.pone.0195345), 2018-04-05
Supplement: pone.0195345.s001.pdf [file pone.0195345.s001.pdf]

**S1 Table. Applied fungicides in the long-term field trial.**

| Pathogen                           | Synonyms                                                                                                                         | Disease                        | Crop             | Credo          | Opus | Amistar | Gladio         |
|------------------------------------|----------------------------------------------------------------------------------------------------------------------------------|--------------------------------|------------------|----------------|------|---------|----------------|
|                                    |                                                                                                                                  |                                |                  |                | Top  | Opti    |                |
| <b>Drechslera tritici-vulgaris</b> | <i>Pyrenophora tritici-repentis</i><br><i>Helminthosporium tritici-repentis</i>                                                  | yellow leaf spot /<br>tan spot | wheat            | ●              | ●    | ●       | ●              |
| <b>Erysiphe graminis</b>           | <i>Blumeria graminis</i> ,<br><i>Oidium monilioides</i>                                                                          | powdery mildew                 | wheat,<br>barley | ● <sup>1</sup> | ●    |         | ●              |
| <b>Fusarium sp.</b>                | <i>Gibberella sp.</i>                                                                                                            | Fusariosis                     | wheat            |                |      |         | ●              |
| <b>Puccinia recondita</b>          | <i>P. triticina</i>                                                                                                              | brown rust                     | wheat            | ●              | ●    | ●       | ●              |
| <b>Puccinia striiformis</b>        | <i>P. glumarum</i> ,<br><i>P. straminis</i>                                                                                      | stripe rust /<br>yellow rust   | wheat,<br>barley | ● <sup>2</sup> | ●    |         | ● <sup>2</sup> |
| <b>Septoria nodorum</b>            | <i>Parastagonospora nodorum</i> ,<br><i>Stagonospora nodorum</i><br><i>Phaeosphaeria nodorum</i><br><i>Leptosphaeria nodorum</i> | <i>Stagonospora</i><br>blotch  | wheat            |                | ●    |         | ●              |
| <b>Septoria tritici</b>            | <i>Mycosphaerella graminicola</i>                                                                                                | <i>Septoria</i> leaf<br>blotch | wheat            | ●              | ●    | ●       | ●              |

Fungicides were applied (●) jointly during the sampling year only in the intensive winter wheat variants on BBCH 31 (Opus Top und Credo) and BBCH 49 (Amistar Opti and Gladio), respectively. The overview considers only the effectiveness against pathogens of crops, which were cultivated in the field according to the crop rotation cycle 'maize, winter wheat (WW1), barley, rapeseed, winter wheat (WW2)', <sup>1</sup>effective on barley, <sup>2</sup>effective on wheat.
