# Supplementary material for: Fungal community profiles in agricultural soils of a long-term field trial under different tillage, fertilization and crop rotation conditions analyzed by high-throughput ITS-amplicon sequencing
Source: PubMed Central journal article supplement (PMC5886558; doi:10.1371/journal.pone.0195345), 2018-04-05
Supplement: pone.0195345.s002.pdf [file pone.0195345.s002.pdf]

**S2 Table. C<sub>q</sub> values of upstream qPCR experiments.** The numbers of PCR cycles for amplicon generation were determined for the ITS1 and ITS2 primers by qPCR.

| <b>Samples</b>                             | <b>C<sub>q</sub> of ITS1</b> | <b>C<sub>q</sub> of ITS2</b> |
|--------------------------------------------|------------------------------|------------------------------|
| WW1_MP_int_R3<br>1 <sup>st</sup> isolation | 20.06                        | 18.55                        |
| WW1_MP_int_R2<br>3 <sup>rd</sup> isolation | 18.85                        | 17.95                        |
| WW1_MP_int_R4<br>3 <sup>rd</sup> isolation | 19.17                        | 17.93                        |
| WW1_CT_int_R1<br>1 <sup>st</sup> isolation | 20.13                        | 18.67                        |
| WW1_CT_int_R1<br>2 <sup>nd</sup> isolation | 18.03                        | 18.29                        |
| WW1_MP_ext_R1<br>3 <sup>rd</sup> isolation | 19.51                        | 17.74                        |
| WW1_CT_int_R1<br>3 <sup>rd</sup> isolation | 20.26                        | 18.60                        |
| WW1_MP_ext_R2<br>1 <sup>st</sup> isolation | 19.51                        | 18.05                        |
| WW1_CT_int_R4<br>2 <sup>nd</sup> isolation | 18.19                        | 18.13                        |
