# Supplementary material for: Fungal community profiles in agricultural soils of a long-term field trial under different tillage, fertilization and crop rotation conditions analyzed by high-throughput ITS-amplicon sequencing
Source: PubMed Central journal article supplement (PMC5886558; doi:10.1371/journal.pone.0195345), 2018-04-05
Supplement: pone.0195345.s003.pdf [file pone.0195345.s003.pdf]

**S3 Table. Physicochemical soil properties of the long-term field trial.** Macro- and micronutrients as well as soil texture in the long-term field trial.

| pH    | P2O5    | K       | Mg      | N     | S     | C total. | C org. | C anorg. |
|-------|---------|---------|---------|-------|-------|----------|--------|----------|
| CaCl2 | CAL     | CAL     | CaCl2   | EA    | EA    | EA       | EA     | EA       |
|       | mg/100g | mg/100g | mg/100g | %     | %     | %        | %      | %        |
| 7.4   | 15      | 26      | 11      | 0.202 | 0.042 | 2.95     | 2.36   | 0.590    |

| Cu    | Fe    | Mg    | Mn    | Zn    | K     |
|-------|-------|-------|-------|-------|-------|
| CAT   | CAT   | CAT   | CAT   | CAT   | CAT   |
| mg/kg | mg/kg | mg/kg | mg/kg | mg/kg | mg/kg |
| 4.28  | 20.0  | 127   | 63.6  | 28.9  | 137   |

| B       | Ca      | Cu      | Fe      | K       | Mg      | Mn      | P       | Zn      |
|---------|---------|---------|---------|---------|---------|---------|---------|---------|
| ICP-OES | ICP-OES | ICP-OES | ICP-OES | ICP-OES | ICP-OES | ICP-OES | ICP-OES | ICP-OES |
| mg/kg   | mg/kg   | mg/kg   | mg/kg   | mg/kg   | mg/kg   | mg/kg   | mg/kg   | mg/kg   |
| 16.7    | 22,863  | 26.7    | 15,337  | 2,887   | 4,046   | 483     | 459     | 180     |

|           |       |       |         | KGA-3 | KGA-3 | KGA-3 |
|-----------|-------|-------|---------|-------|-------|-------|
| Carbonate | NH4-N | NO3-N | P Olsen | Sand  | Silt  | Clay  |
| %         | mg/kg | mg/kg | mg/kg   | %     | %     | %     |
| 5.89      | 6.20  | 68.0  | 21.9    | 8     | 70    | 22    |
