# Supplementary material for: Fungal community profiles in agricultural soils of a long-term field trial under different tillage, fertilization and crop rotation conditions analyzed by high-throughput ITS-amplicon sequencing
Source: PubMed Central journal article supplement (PMC5886558; doi:10.1371/journal.pone.0195345), 2018-04-05
Supplement: pone.0195345.s004.pdf [file pone.0195345.s004.pdf]

**S4 Table. Numbers of amplicon reads per replicate for ITS1 and ITS2 datasets.** High quality reads obtained per replicate and primer pair including means and standard deviations.

| <b>Samples</b> | <b>ITS1</b> | <b>Means ± SD</b> | <b>ITS2</b> | <b>Means ± SD</b> |
|----------------|-------------|-------------------|-------------|-------------------|
| WW1_MP_int_R1  | 100,169     | 91,906 ± 13,673   | 69,297      | 69,882 ± 18,924   |
| WW1_MP_int_R2  | 106,710     |                   | 60,658      |                   |
| WW1_MP_int_R3  | 82,298      |                   | 96,475      |                   |
| WW1_MP_int_R4  | 78,448      |                   | 53,098      |                   |
| WW1_MP_ext_R1  | 89,580      | 101,498 ± 13,635  | 80,089      | 69,359 ± 9,915    |
| WW1_MP_ext_R2  | 104,576     |                   | 56,144      |                   |
| WW1_MP_ext_R3  | 119,467     |                   | 69,579      |                   |
| WW1_MP_ext_R4  | 92,368      |                   | 71,623      |                   |
| WW1_CT_int_R1  | 99,268      | 89,919 ± 15,731   | 51,929      | 63,776 ± 12,096   |
| WW1_CT_int_R2  | 79,832      |                   | 78,723      |                   |
| WW1_CT_int_R3  | 106,916     |                   | 56,296      |                   |
| WW1_CT_int_R4  | 73,659      |                   | 68,157      |                   |
| WW1_CT_ext_R1  | 76,829      | 91,731 ± 15,611   | 51,068      | 59,214 ± 12,653   |
| WW1_CT_ext_R2  | 81,578      |                   | 57,427      |                   |
| WW1_CT_ext_R3  | 111,044     |                   | 50,737      |                   |
| WW1_CT_ext_R4  | 97,474      |                   | 77,623      |                   |
| WW2_MP_int_R1  | 91,243      | 88,818 ± 12,413   | 48,193      | 69,983 ± 19,632   |
| WW2_MP_int_R2  | 105,105     |                   | 95,545      |                   |
| WW2_MP_int_R3  | 82,295      |                   | 71,330      |                   |
| WW2_MP_int_R4  | 76,629      |                   | 64,863      |                   |
| WW2_MP_ext_R1  | 72,141      | 76,589 ± 4,178    | 76,202      | 84,510 ± 11,509   |
| WW2_MP_ext_R2  | 81,424      |                   | 95,436      |                   |
| WW2_MP_ext_R3  | 74,259      |                   | 73,063      |                   |
| WW2_MP_ext_R4  | 78,530      |                   | 93,340      |                   |
| WW2_CT_int_R1  | 74,005      | 79,865 ± 19,443   | 59,849      | 72,614 ± 16,286   |
| WW2_CT_int_R2  | 70,236      |                   | 60,149      |                   |
| WW2_CT_int_R3  | 66,549      |                   | 94,148      |                   |
| WW2_CT_int_R4  | 108,669     |                   | 76,311      |                   |
| WW2_CT_ext_R1  | 91,655      | 90,153 ± 25,524   | 80,987      | 72,094 ± 19,050   |
| WW2_CT_ext_R2  | 106,374     |                   | 60,537      |                   |
| WW2_CT_ext_R3  | 108,969     |                   | 94,312      |                   |
| WW2_CT_ext_R4  | 53,615      |                   | 52,538      |                   |
