# Supplementary material for: Fungal community profiles in agricultural soils of a long-term field trial under different tillage, fertilization and crop rotation conditions analyzed by high-throughput ITS-amplicon sequencing
Source: PubMed Central journal article supplement (PMC5886558; doi:10.1371/journal.pone.0195345), 2018-04-05
Supplement: pone.0195345.s007.pdf [file pone.0195345.s007.pdf]

**S7 Table. Shannon and Simpson diversity indices.** Alpha diversity based on the ITS1 (a) and ITS2 dataset (b).

a) Shannon and Simpson Indices based on ITS1 dataset

| Samples       | Shannon index | Means $\pm$ SD                    | Simpson index | Means $\pm$ SD                      |
|---------------|---------------|-----------------------------------|---------------|-------------------------------------|
| WW1_MP_int_R1 | 4.09          | <b>3.94 <math>\pm</math> 0.15</b> | 0,960         | <b>0.954 <math>\pm</math> 0.009</b> |
| WW1_MP_int_R2 | 3.97          |                                   | 0,956         |                                     |
| WW1_MP_int_R3 | 3.74          |                                   | 0,941         |                                     |
| WW1_MP_int_R4 | 3.98          |                                   | 0,960         |                                     |
| WW1_MP_ext_R1 | 4.18          | <b>3.99 <math>\pm</math> 0.27</b> | 0,960         | <b>0.952 <math>\pm</math> 0.017</b> |
| WW1_MP_ext_R2 | 3.92          |                                   | 0,951         |                                     |
| WW1_MP_ext_R3 | 4.22          |                                   | 0,967         |                                     |
| WW1_MP_ext_R4 | 3.65          |                                   | 0,928         |                                     |
| WW1_CT_int_R1 | 4.21          | <b>4.04 <math>\pm</math> 0.17</b> | 0,959         | <b>0.953 <math>\pm</math> 0.007</b> |
| WW1_CT_int_R2 | 4.03          |                                   | 0,953         |                                     |
| WW1_CT_int_R3 | 3.81          |                                   | 0,944         |                                     |
| WW1_CT_int_R4 | 4.09          |                                   | 0,957         |                                     |
| WW1_CT_ext_R1 | 4.03          | <b>3.77 <math>\pm</math> 0.26</b> | 0,954         | <b>0.923 <math>\pm</math> 0.036</b> |
| WW1_CT_ext_R2 | 3.92          |                                   | 0,942         |                                     |
| WW1_CT_ext_R3 | 3.71          |                                   | 0,923         |                                     |
| WW1_CT_ext_R4 | 3.43          |                                   | 0,873         |                                     |
| WW2_MP_int_R1 | 3.95          | <b>3.72 <math>\pm</math> 0.39</b> | 0,952         | <b>0.929 <math>\pm</math> 0.041</b> |
| WW2_MP_int_R2 | 3.14          |                                   | 0,869         |                                     |
| WW2_MP_int_R3 | 3.98          |                                   | 0,957         |                                     |
| WW2_MP_int_R4 | 3.80          |                                   | 0,938         |                                     |
| WW2_MP_ext_R1 | 3.94          | <b>3.90 <math>\pm</math> 0.30</b> | 0,954         | <b>0.945 <math>\pm</math> 0.020</b> |
| WW2_MP_ext_R2 | 3.47          |                                   | 0,914         |                                     |
| WW2_MP_ext_R3 | 4.03          |                                   | 0,952         |                                     |
| WW2_MP_ext_R4 | 4.15          |                                   | 0,958         |                                     |
| WW2_CT_int_R1 | 3.75          | <b>3.61 <math>\pm</math> 0.13</b> | 0,930         | <b>0.921 <math>\pm</math> 0.008</b> |
| WW2_CT_int_R2 | 3.53          |                                   | 0,918         |                                     |
| WW2_CT_int_R3 | 3.47          |                                   | 0,912         |                                     |
| WW2_CT_int_R4 | 3.67          |                                   | 0,925         |                                     |
| WW2_CT_ext_R1 | 3.88          | <b>3.83 <math>\pm</math> 0.12</b> | 0,950         | <b>0.945 <math>\pm</math> 0.009</b> |
| WW2_CT_ext_R2 | 3.94          |                                   | 0,950         |                                     |
| WW2_CT_ext_R3 | 3.65          |                                   | 0,931         |                                     |
| WW2_CT_ext_R4 | 3.86          |                                   | 0,949         |                                     |

Soil samples were investigated from mould-board plough intensive (MP\_int), mould-board plough extensive (MP\_ext), conservation tillage intensive (CT\_int) and CT extensive variants (CT\_ext) in four replicates. Values are presented for each of the four replicates (R1-R4) and as means  $\pm$  standard deviation. Alpha diversity values based on ITS1 dataset (a) and ITS2 dataset (b).

b) Shannon and Simpson Indices based on ITS2 dataset

| Samples       | Shannon index | Means $\pm$ SD                    | Simpson index | Means $\pm$ SD                      |
|---------------|---------------|-----------------------------------|---------------|-------------------------------------|
| WW1_MP_int_R1 | 4.17          | <b>3.98 <math>\pm</math> 0.16</b> | 0.960         | <b>0.947 <math>\pm</math> 0.016</b> |
| WW1_MP_int_R2 | 3.80          |                                   | 0.925         |                                     |
| WW1_MP_int_R3 | 4.03          |                                   | 0.956         |                                     |
| WW1_MP_int_R4 | 3.91          |                                   | 0.948         |                                     |
| WW1_MP_ext_R1 | 4.43          | <b>3.91 <math>\pm</math> 0.64</b> | 0.974         | <b>0.930 <math>\pm</math> 0.066</b> |
| WW1_MP_ext_R2 | 4.18          |                                   | 0.967         |                                     |
| WW1_MP_ext_R3 | 4.07          |                                   | 0.947         |                                     |
| WW1_MP_ext_R4 | 2.98          |                                   | 0.832         |                                     |
| WW1_CT_int_R1 | 4.36          | <b>4.22 <math>\pm</math> 0.10</b> | 0.973         | <b>0.965 <math>\pm</math> 0.009</b> |
| WW1_CT_int_R2 | 4.23          |                                   | 0.971         |                                     |
| WW1_CT_int_R3 | 4.16          |                                   | 0.959         |                                     |
| WW1_CT_int_R4 | 4.12          |                                   | 0.956         |                                     |
| WW1_CT_ext_R1 | 4.33          | <b>4.38 <math>\pm</math> 0.10</b> | 0.975         | <b>0.975 <math>\pm</math> 0.005</b> |
| WW1_CT_ext_R2 | 4.29          |                                   | 0.970         |                                     |
| WW1_CT_ext_R3 | 4.40          |                                   | 0.975         |                                     |
| WW1_CT_ext_R4 | 4.51          |                                   | 0.981         |                                     |
| WW2_MP_int_R1 | 3.93          | <b>3.57 <math>\pm</math> 0.49</b> | 0.952         | <b>0.901 <math>\pm</math> 0.069</b> |
| WW2_MP_int_R2 | 2.84          |                                   | 0.799         |                                     |
| WW2_MP_int_R3 | 3.75          |                                   | 0.931         |                                     |
| WW2_MP_int_R4 | 3.76          |                                   | 0.923         |                                     |
| WW2_MP_ext_R1 | 3.62          | <b>3.61 <math>\pm</math> 0.52</b> | 0.926         | <b>0.910 <math>\pm</math> 0.063</b> |
| WW2_MP_ext_R2 | 2.87          |                                   | 0.817         |                                     |
| WW2_MP_ext_R3 | 4.00          |                                   | 0.946         |                                     |
| WW2_MP_ext_R4 | 3.95          |                                   | 0.950         |                                     |
| WW2_CT_int_R1 | 3.69          | <b>4.04 <math>\pm</math> 0.26</b> | 0.912         | <b>0.951 <math>\pm</math> 0.027</b> |
| WW2_CT_int_R2 | 4.01          |                                   | 0.957         |                                     |
| WW2_CT_int_R3 | 4.18          |                                   | 0.964         |                                     |
| WW2_CT_int_R4 | 4.28          |                                   | 0.973         |                                     |
| WW2_CT_ext_R1 | 3.68          | <b>3.71 <math>\pm</math> 0.61</b> | 0.934         | <b>0.907 <math>\pm</math> 0.099</b> |
| WW2_CT_ext_R2 | 4.12          |                                   | 0.965         |                                     |
| WW2_CT_ext_R3 | 4.19          |                                   | 0.968         |                                     |
| WW2_CT_ext_R4 | 2.87          |                                   | 0.759         |                                     |
