# Supplementary material for: Fungal community profiles in agricultural soils of a long-term field trial under different tillage, fertilization and crop rotation conditions analyzed by high-throughput ITS-amplicon sequencing
Source: PubMed Central journal article supplement (PMC5886558; doi:10.1371/journal.pone.0195345), 2018-04-05

**S1 Fig. Rarefaction curves of OTUs for each soil treatment.** Graphs are based on the mean of the four replicates including standard deviations.

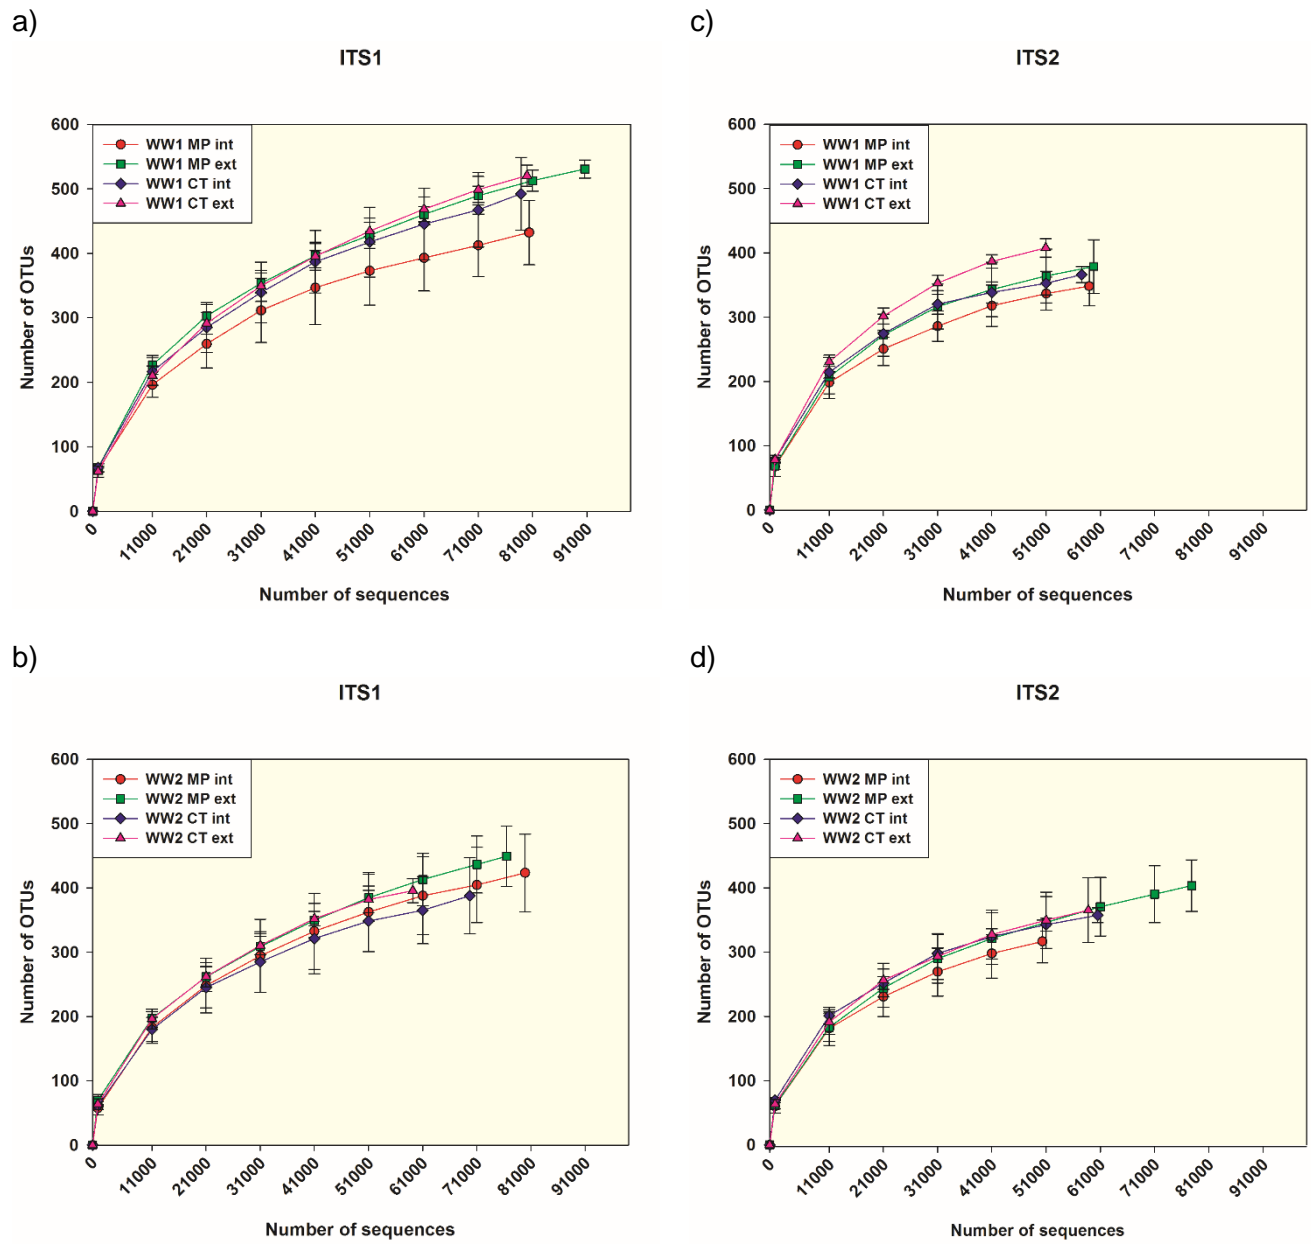

Supplement: pone.0195345.s008.pdf [file pone.0195345.s008.pdf]
