# Supplementary material for: Fungal community profiles in agricultural soils of a long-term field trial under different tillage, fertilization and crop rotation conditions analyzed by high-throughput ITS-amplicon sequencing
Source: PubMed Central journal article supplement (PMC5886558; doi:10.1371/journal.pone.0195345), 2018-04-05

**S2 Fig. Venn Diagrams presenting fungal genera in differently managed soils. Graphs were focused on (a) MP vs. CT and (b) int vs. ext treatments.**

a)

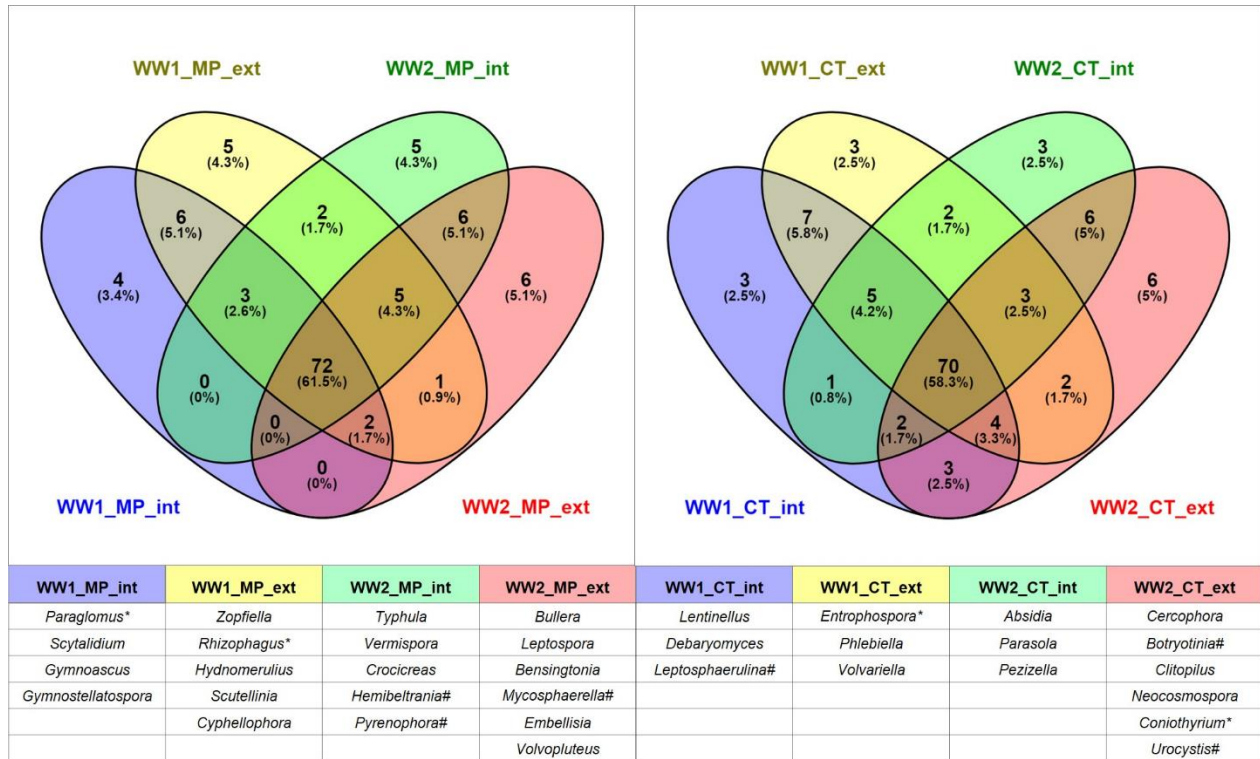

b)

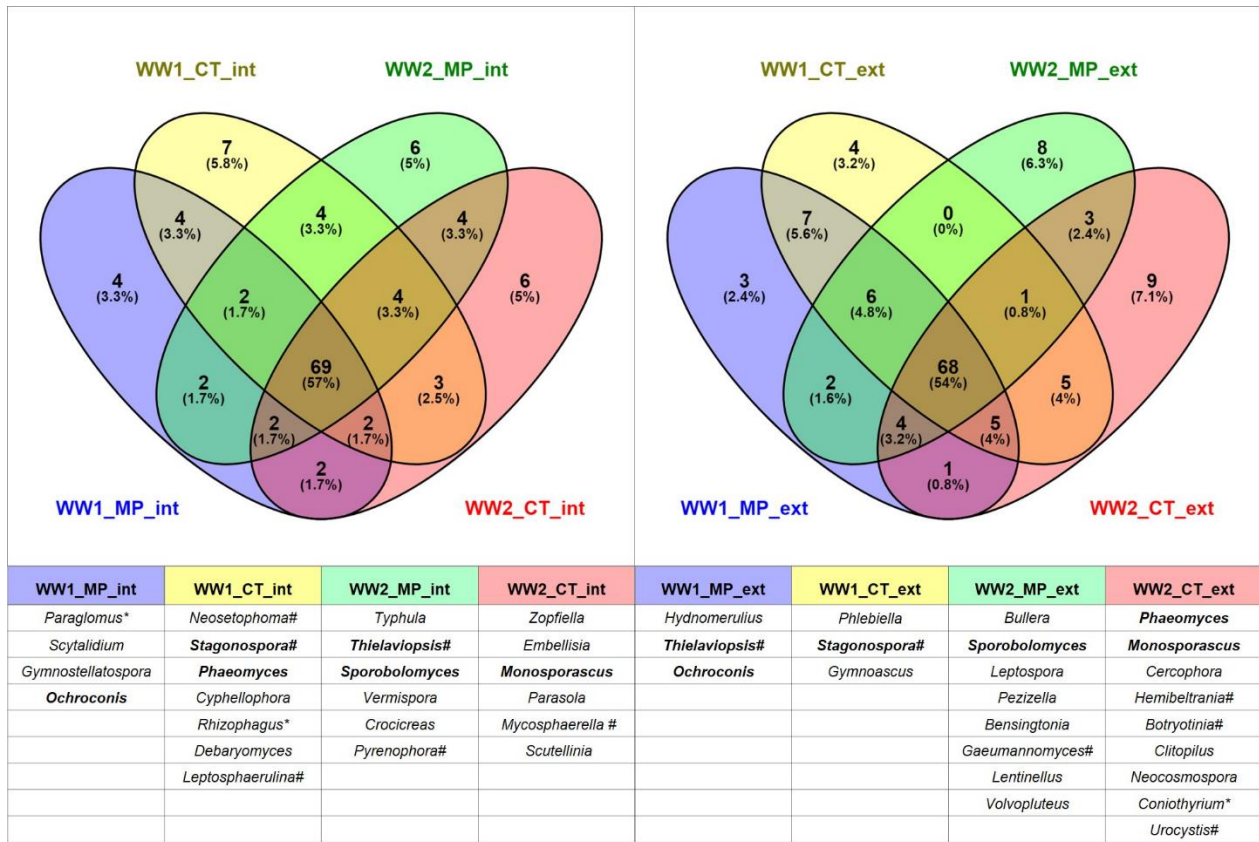

Supplement: pone.0195345.s009.pdf [file pone.0195345.s009.pdf]
