# Supplementary material for: Fungal community profiles in agricultural soils of a long-term field trial under different tillage, fertilization and crop rotation conditions analyzed by high-throughput ITS-amplicon sequencing
Source: PLoS One. 2018 Apr 5;13(4):e0195345. doi: 10.1371/journal.pone.0195345 (PMC5886558; doi:10.1371/journal.pone.0195345)
Supplement: S5 Table — (XLS) [file pone.0195345.s005.xls]

## Sheet: Tabelle1
OTU	Taxonomic classification	WW1_MP_int_R1	WW1_MP_int_R2	WW1_MP_int_R3	WW1_MP_int_R4	WW1_MP_ext_R1	WW1_MP_ext_R2	WW1_MP_ext_R3	WW1_MP_ext_R4	WW1_CT_int_R1	WW1_CT_int_R2	WW1_CT_int_R3	WW1_CT_int_R4	WW1_CT_ext_R1	WW1_CT_ext_R2	WW1_CT_ext_R3	WW1_CT_ext_R4	WW2_MP_int_R1	WW2_MP_int_R2	WW2_MP_int_R3	WW2_MP_int_R4	WW2_MP_ext_R1	WW2_MP_ext_R2	WW2_MP_ext_R3	WW2_MP_ext_R4	WW2_CT_int_R1	WW2_CT_int_R2	WW2_CT_int_R3	WW2_CT_int_R4	WW2_CT_ext_R1	WW2_CT_ext_R2	WW2_CT_ext_R3	WW2_CT_ext_R4
OTU_1	G_Cystofilobasidium	0.2052	0.1368	0.2289	0.1191	0.3212	0.2931	0.3929	0.2199	0.1780	0.1939	0.1287	0.1761	0.1591	0.3649	0.2259	0.1479	0.2724	0.2321	0.2235	0.3395	0.5553	1.1357	0.5031	0.7866	0.2691	0.2239	0.2713	0.2330	1.0272	0.8434	0.9019	0.6277
OTU_2	F_Nectriaceae	0.1061	0.1377	0.0884	0.1001	0.0778	0.0733	0.0682	0.0701	0.1000	0.0609	0.0345	0.0995	0.0556	0.0818	0.0789	0.0530	0.0626	0.0448	0.0552	0.0819	0.0770	0.0270	0.0613	0.1077	0.0870	0.0987	0.1374	0.1251	0.0534	0.1092	0.1059	0.1176
OTU_3	P_Ascomycota	0.0129	0.0159	0.0036	0.0507	0.0945	0.0133	0.0682	0.0916	0.0230	0.0075	0.0159	0.0524	0.0104	0.0952	0.0063	0.0082	0.0121	0.0269	0.1858	0.1757	0.0625	0.0638	0.1240	0.2617	0.0122	0.0391	0.0119	0.0172	0.0443	0.0925	0.0217	0.0171
OTU_4	G_Dendryphion	0.0456	0.0515	0.0024	0.0406	0.0322	0.0485	0.0269	0.1218	0.1350	0.0771	0.0298	0.0713	0.0634	0.0757	0.0878	0.1142	0.0253	0.0209	0.0377	0.1206	0.0291	0.0282	0.1079	0.2602	0.0951	0.0940	0.1933	0.0430	0.0807	0.0581	0.0733	0.1062
OTU_5	G_Cryptococcus	0.0268	0.0309	0.1380	0.0253	0.0467	0.0419	0.0631	0.0366	0.0090	0.0497	0.0513	0.0914	0.0323	0.0330	0.0350	0.0122	0.0670	0.0657	0.0619	0.0908	0.1657	0.1437	0.2421	0.2482	0.0530	0.0736	0.0288	0.0105	0.1216	0.0935	0.0580	0.0455
OTU_6	G_Pochonia	0.0089	0.0178	0.0061	0.0114	0.0089	0.0181	0.0076	0.0086	0.0240	0.0075	0.0047	0.0336	0.0026	0.0061	0.0099	0.0112	0.0121	0.0129	0.0108	0.0313	0.0073	0.0025	0.0044	0.0150	0.0163	0.0266	0.0068	0.0239	0.0080	0.0079	0.0127	0.0114
OTU_7	D_Fungi	0.0278	0.0141	0.0133	0.0101	0.0078	0.0171	0.0177	0.0528	0.1830	0.0572	0.0131	0.0121	0.0194	0.0195	0.0143	0.0041	0.0000	0.0010	0.0000	0.0000	0.0291	0.0086	0.0029	0.0000	0.0027	0.0031	0.0017	0.0000	0.0159	0.0207	0.0163	0.1119
OTU_8	G_Sphaerodes	0.0664	0.0262	0.0109	0.0127	0.0111	0.0238	0.0194	0.0291	0.0370	0.0199	0.0177	0.0081	0.0104	0.0110	0.0161	0.0112	0.0582	0.0179	0.0364	0.0685	0.0160	0.0307	0.0117	0.0553	0.1414	0.0830	0.0509	0.0535	0.0273	0.0512	0.0217	0.0834
OTU_9	D_Fungi	0.0337	0.0103	0.0121	0.0292	0.0322	0.0428	0.0050	0.0151	0.0100	0.0124	0.0448	0.0471	0.0492	0.0195	0.0134	0.0194	0.0264	0.0149	0.0417	0.0342	0.0160	0.0160	0.0365	0.0299	0.0150	0.0438	0.0119	0.0563	0.0045	0.0059	0.0036	0.0114
OTU_10	G_Cryptococcus	0.0089	0.0272	0.0073	0.0089	0.0156	0.0190	0.0395	0.0129	0.0090	0.0174	0.0112	0.0229	0.0129	0.0122	0.0179	0.0031	0.0275	0.0339	0.0296	0.0715	0.0698	0.0688	0.1677	0.1122	0.0231	0.0125	0.0187	0.0048	0.0761	0.0384	0.0326	0.0360
OTU_11	G_Mortierella	0.1051	0.1687	0.1259	0.0355	1.3215	2.2608	0.1658	0.2651	0.0380	0.1268	0.1679	0.2407	0.0970	0.1635	0.1416	1.4186	0.2417	1.4571	2.1708	0.9693	0.1032	0.0589	0.4681	0.6730	0.0748	0.0298	0.1458	0.1595	0.0557	0.0413	0.0444	0.0322
OTU_12	F_Lasiosphaeriaceae	0.2399	0.8199	0.2385	0.4322	0.2001	1.1390	0.3559	0.5572	0.0470	0.2684	0.0233	0.1869	0.1203	0.3100	0.2877	0.3141	0.1670	0.0996	0.5912	0.0432	0.3533	0.0724	0.0758	0.4920	0.0544	0.0282	0.6054	0.2521	1.4328	0.1584	0.1331	0.0967
OTU_13	P_Basidiomycota	0.0654	0.0675	0.1792	0.0317	0.0556	0.0257	0.0387	0.0366	0.0450	0.0174	0.0187	0.0148	0.0246	0.0220	0.0090	0.0051	0.0901	0.0329	0.0067	0.0104	0.0073	0.0405	0.3850	0.0000	0.0788	0.1519	0.0594	0.0716	0.0023	0.0256	0.0072	0.0057
OTU_14	G_Rhizopus	0.0496	0.0300	0.0351	0.0418	0.0467	0.0561	0.0236	0.0668	0.5999	0.1678	0.1175	0.2568	0.1384	0.0891	0.1013	0.1703	0.0615	0.0199	0.0498	0.1429	0.0320	0.0184	0.0423	0.1077	0.3724	0.3711	0.3900	0.4011	0.3079	0.1584	0.2001	0.2731
OTU_15	D_Fungi	0.0059	0.0056	0.0036	0.0063	0.0033	0.0124	0.0076	0.0140	0.0260	0.0124	0.0103	0.0000	0.0129	0.0049	0.0090	0.0061	0.1362	0.0110	0.0040	0.0000	0.0291	0.0160	0.0292	0.0045	0.0136	0.0063	0.0034	0.0029	0.0216	0.0157	0.0081	0.0076
OTU_16	F_Filobasidiaceae	0.0119	0.0066	0.0230	0.0051	0.0211	0.0133	0.0177	0.0119	0.0020	0.0124	0.0093	0.0255	0.0078	0.0159	0.0260	0.0041	0.0220	0.0100	0.0189	0.0313	0.0930	0.0467	0.1663	0.1017	0.0109	0.0078	0.0085	0.0029	0.0545	0.0541	0.0163	0.0171
OTU_17	G_Pseudozyma	0.0050	0.0084	0.0073	0.0114	0.0200	0.0114	0.0151	0.0216	0.0470	0.0348	0.0373	0.0672	0.0246	0.0159	0.0556	0.0286	0.0406	0.0199	0.0458	0.0536	0.0494	0.0307	0.0335	0.0568	0.0503	0.0595	0.0543	0.0869	0.0807	0.0522	0.0851	0.0417
OTU_18	C_Sordariomycetes	0.1071	0.0244	0.0036	0.0038	0.0033	0.0038	0.0135	0.0054	0.0060	0.0050	0.0009	0.0081	0.0052	0.0061	0.0045	0.0051	0.0209	0.0060	0.0054	0.0030	0.0087	0.0123	0.0102	0.0254	0.0177	0.0157	0.0119	0.0172	0.0023	0.0000	0.0009	0.0076
OTU_19	P_Ascomycota	0.0426	0.0487	0.0145	0.0456	0.0333	0.0666	0.0118	0.0981	0.1250	0.0273	0.0550	0.0497	0.0569	0.0696	0.2070	0.1530	0.0461	0.0209	0.0633	0.0208	0.0770	0.0196	0.0496	0.0464	0.0516	0.0391	0.0288	0.0392	0.0193	0.0403	0.0154	0.0550
OTU_20	P_Ascomycota	0.0823	0.1668	0.0254	0.1863	0.0789	0.0799	0.0555	0.0485	0.0190	0.0037	0.0140	0.0793	0.0091	0.0110	0.0117	0.0051	0.0198	0.0020	0.0121	0.0625	0.0174	0.0049	0.0190	0.0673	0.0285	0.0391	0.0441	0.0430	0.0114	0.0374	0.0100	0.0076
OTU_21	G_Aureobasidium	0.0000	0.0094	0.0085	0.0038	0.0333	0.0038	0.0194	0.0129	0.0030	0.0087	0.0205	0.0269	0.0091	0.0049	0.0296	0.0031	0.0022	0.0020	0.0081	0.0074	0.0756	0.0651	0.1838	0.2527	0.0027	0.0031	0.0034	0.0010	0.0273	0.0197	0.0281	0.0133
OTU_22	O_Pleosporales	0.0178	0.0337	0.0618	0.0190	0.0089	0.2160	0.2087	0.0690	0.0820	0.0994	0.0634	0.0793	0.0595	0.0928	0.0134	0.1010	0.4372	0.0209	0.4659	0.7340	0.3300	0.0602	0.3529	0.3993	0.6266	0.2286	0.0373	0.3132	0.3295	0.1614	0.2943	0.2124
OTU_23	G_Ulocladium	0.0268	0.0197	0.0133	0.0431	0.0211	0.0209	0.0109	0.0183	0.0540	0.0360	0.0476	0.0538	0.0466	0.0305	0.0475	0.0265	0.0461	0.0120	0.0242	0.0521	0.0363	0.0307	0.0350	0.1391	0.0367	0.0376	0.0695	0.0172	0.0454	0.0374	0.0570	0.0341
OTU_24	G_Trichocladium	0.2022	0.2689	0.0969	0.2877	0.2779	0.1703	0.3761	0.1649	0.2030	0.0857	0.0681	0.3832	0.2743	0.1513	0.3074	0.1642	0.4064	0.1882	0.0997	0.2323	0.2806	0.0933	0.1473	0.3499	0.1468	0.2083	0.2255	0.3123	0.3852	0.2913	0.1404	0.2219
OTU_25	G_Acrostalagmus	0.0079	0.0103	0.0061	0.0114	0.0078	0.0228	0.0118	0.0194	0.0310	0.0273	0.0270	0.0269	0.0518	0.0305	0.0188	0.0122	0.0044	0.0050	0.0040	0.0179	0.0102	0.0246	0.0146	0.0404	0.1250	0.1112	0.0661	0.1022	0.0148	0.0285	0.0290	0.0038
OTU_26	D_Fungi	0.0397	0.0112	0.0036	0.0076	0.0133	0.0029	0.0118	0.0140	0.0390	0.0112	0.0019	0.0027	0.0052	0.0061	0.0027	0.0133	0.0231	0.0030	0.0013	0.0119	0.0000	0.0025	0.0088	0.0150	0.0177	0.0016	0.0068	0.0048	0.0023	0.0039	0.0045	0.0057
OTU_27	P_Ascomycota	0.0059	0.0037	0.0024	0.0101	0.0089	0.0029	0.0050	0.0054	0.0060	0.0000	0.0037	0.0027	0.0052	0.0012	0.0045	0.0163	0.0132	0.0139	0.0229	0.0566	0.0102	0.0037	0.0102	0.0538	0.0095	0.0125	0.0102	0.0134	0.0023	0.0030	0.0100	0.0057
OTU_28	C_Dothideomycetes	0.7841	0.8124	0.7641	0.7123	0.6402	0.7013	0.5679	0.4160	0.7888	1.0911	0.4821	0.7207	0.4619	0.4992	0.6274	0.5538	0.7920	0.7330	0.8551	0.8308	0.6455	0.4297	0.5936	0.7717	0.4173	0.5043	0.4697	0.7200	0.4261	0.6161	0.5551	0.4267
OTU_29	F_Nectriaceae	0.1893	0.2380	0.1344	0.1724	0.1556	0.1513	0.1716	0.0905	0.2200	0.1603	0.1306	0.2702	0.1113	0.1172	0.1138	0.1581	0.1900	0.1115	0.1953	0.1563	0.2166	0.0909	0.1779	0.2737	0.2881	0.2725	0.2866	0.2932	0.2863	0.2844	0.3178	0.2807
OTU_30	O_Pleosporales	0.4897	0.5810	0.8004	0.5463	0.4612	0.3073	0.3029	0.2565	0.4449	0.3815	0.3711	0.3590	0.2795	0.2514	0.2079	0.1316	1.0171	0.4123	0.5117	0.3484	0.7574	0.4175	0.8911	0.7657	0.3466	0.4526	0.6851	1.0657	0.6988	0.4242	0.7316	0.3736
OTU_31	P_Ascomycota	0.0248	0.0150	0.0242	0.0482	0.0033	0.0010	0.0034	0.0097	0.0290	0.0124	0.0112	0.0538	0.0078	0.0073	0.0018	0.0071	0.2219	0.0289	0.0135	0.0610	0.0669	0.0454	0.0277	0.0105	0.0652	0.0767	0.0678	0.0563	0.0068	0.0157	0.0072	0.0095
OTU_32	C_Sordariomycetes	1.2451	1.7129	0.9360	1.6591	0.7147	0.7365	1.5414	0.9064	2.8464	1.3732	1.2477	3.9703	1.0752	0.7725	1.0872	1.1841	2.2452	0.9561	2.1816	4.5040	1.2517	0.8374	1.8317	3.1420	3.6249	3.2072	3.6424	3.2335	1.4964	1.5953	2.6957	1.8984
OTU_33	G_Mortierella	0.4947	0.3533	0.4153	0.1255	0.6691	0.2750	0.2146	0.5788	0.3269	0.6301	0.1772	0.1748	0.2394	0.5797	0.4679	0.6568	0.3625	0.6663	0.1064	0.0432	0.3402	0.2222	0.2669	0.0987	0.2854	0.3696	0.4273	0.3247	0.1488	0.3868	0.4609	0.4020
OTU_34	G_Cladosporium	0.2082	2.0287	0.4977	1.1774	0.3001	0.3996	1.5406	0.1951	1.1817	0.7133	0.8439	1.2154	0.5421	0.5943	0.5199	0.3202	0.1845	0.0458	0.1710	0.0610	0.3256	0.2247	0.5352	0.3724	0.1060	0.1597	0.0560	0.0439	0.5420	0.1958	0.1838	0.2105
OTU_35	G_Alternaria	0.0843	0.8040	0.1187	0.4449	0.3179	0.1532	0.1414	0.0722	0.3499	1.2055	1.0108	0.2097	0.2083	0.7347	0.2994	0.0745	0.0989	0.0747	0.0498	0.0834	0.1570	0.0602	0.1444	0.9107	0.8658	0.2286	0.0322	0.0745	0.2897	0.0571	0.0761	0.0550
OTU_36	F_Nectriaceae	0.2627	0.2061	0.0654	0.1926	0.1189	0.1608	0.1624	0.2253	0.1870	0.0994	0.0485	0.0834	0.1061	0.1465	0.1820	0.1336	0.1889	0.0827	0.0687	0.1236	0.1308	0.0700	0.0992	0.2363	0.3357	0.2787	0.1848	0.2502	0.2068	0.2962	0.3513	0.4703
OTU_37	G_Cryptococcus	0.0040	0.0328	0.0194	0.0203	0.0656	0.0381	0.0690	0.0216	0.0130	0.0311	0.0382	0.1035	0.0375	0.0622	0.1156	0.0204	0.0165	0.0100	0.0148	0.0149	0.3649	0.2075	0.3719	0.3559	0.0150	0.0094	0.0102	0.0124	0.0909	0.0374	0.0824	0.0266
OTU_38	F_Pyronemataceae	0.0079	0.0141	0.0036	0.0646	0.0578	0.0409	0.1944	0.1207	0.0360	0.0423	0.0532	0.1829	0.2316	0.0110	0.1506	0.1163	0.0110	0.0080	0.0000	0.0000	0.1759	0.0098	0.0569	0.0135	0.0802	0.0282	0.0237	0.0936	0.1023	0.0463	0.1286	0.0303
OTU_39	P_Ascomycota	1.0666	1.6942	0.5061	1.9645	1.0536	1.7527	0.9945	0.5551	1.0528	0.4200	0.2285	1.9388	0.8786	0.4137	0.5324	0.3417	0.3449	0.3117	0.5212	1.2745	0.7806	0.2984	0.3908	1.1874	0.6021	0.7548	0.4680	0.6933	0.6227	0.6840	0.3423	0.4020
OTU_40	D_Fungi	0.0565	0.0131	0.0121	0.0165	0.0133	0.0143	0.0101	0.0291	0.0140	0.0124	0.0065	0.0040	0.0155	0.0085	0.0045	0.0316	0.0395	0.0179	0.0054	0.0045	0.0087	0.0221	0.0102	0.0135	0.0163	0.0047	0.0068	0.0038	0.0205	0.0118	0.0081	0.0076
OTU_41	G_Mortierella	3.2683	3.2459	2.0149	4.4487	7.8112	3.9308	2.8801	4.7681	2.0156	3.2771	1.8697	2.2467	1.8503	7.3408	3.8326	3.5899	2.2320	4.7846	0.7070	0.5896	1.5831	1.0866	1.1200	0.6266	0.9963	1.3374	1.2904	1.3943	1.0147	3.0902	2.4901	3.6886
OTU_42	G_Dokmaia	2.9878	2.3529	3.6617	1.7858	2.6752	2.6900	3.1687	1.8893	1.0938	1.7722	1.0491	1.5368	1.1011	1.6195	0.9160	0.7690	2.2221	0.8197	1.4073	0.9604	2.2867	1.6969	1.8026	1.2517	1.0765	1.2951	0.7631	1.2854	1.6737	1.9348	1.1726	1.4679
OTU_43	G_Plectosphaerella	0.2102	0.2764	0.0436	0.1052	0.0978	0.0894	0.0311	0.0248	0.0630	0.1168	0.0187	0.0296	0.0194	0.0098	0.0251	0.0041	0.0527	0.0349	0.0108	0.0119	0.0378	0.0356	0.0102	0.0105	0.1182	0.0689	0.0865	0.1022	0.0807	0.1053	0.2952	0.1138
OTU_44	P_Ascomycota	0.0406	0.0440	0.0472	0.0646	0.0445	0.0438	0.0429	0.0334	0.0460	0.0323	0.0233	0.1223	0.0220	0.0378	0.0314	0.0408	0.1197	0.2191	0.2289	0.2874	0.0916	0.0417	0.1152	0.1032	0.0476	0.1190	0.0729	0.1175	0.0489	0.0650	0.0797	0.0834
OTU_45	G_Olpidium_brassicae	0.0813	0.0187	0.1005	0.0380	0.1434	0.0428	0.0917	0.1024	0.0370	0.0969	0.0354	0.0309	0.0323	0.0427	0.0860	0.0948	0.0198	0.0040	0.1495	0.0447	0.0770	0.0209	0.2800	0.1301	0.0326	0.0391	0.0458	0.0917	0.1000	0.1575	0.1947	0.1840
OTU_46	G_Gibberella	0.7653	0.9670	0.7229	1.0773	0.6013	0.4967	0.4114	0.3761	1.7996	1.3123	0.8253	1.8326	0.8372	0.8299	0.6677	0.5314	1.0029	0.5567	1.1662	0.9499	0.4768	0.7821	0.9290	0.9720	1.5209	1.4830	2.2994	1.5996	2.0112	1.5362	1.2061	1.2308
OTU_47	C_Sordariomycetes	1.1648	1.7616	0.7011	2.5323	0.7947	0.6385	0.4072	0.7070	0.7338	0.7668	0.9083	0.5109	0.5007	0.3198	0.5593	0.3355	0.3680	0.1604	0.1643	0.2248	0.2937	0.3438	0.2596	0.3634	0.4213	0.1973	0.3222	0.3419	0.3113	0.3277	0.7851	0.6808
OTU_48	F_Nectriaceae	0.9715	0.9942	1.3065	1.6046	0.9670	0.6071	0.9676	0.5055	1.4467	0.8861	0.8458	1.3848	0.7569	1.2204	0.8165	0.6966	0.9348	0.5757	1.2241	1.3802	0.6469	0.6065	1.0092	1.5702	1.1376	1.1620	1.1361	0.9884	1.1249	1.2587	1.3410	1.3010
OTU_49	O_Sordariales	0.5710	0.4292	0.4662	0.4677	0.3090	0.4539	0.7833	0.8870	0.0530	0.0435	0.0457	0.0968	0.4826	0.2966	0.0851	0.0357	0.0692	0.0647	0.3932	0.1340	0.2282	0.0663	0.4404	0.6505	0.4145	0.7345	0.2577	0.2034	0.2136	0.2608	0.1965	0.0967
OTU_50	P_Ascomycota	0.0278	0.0019	0.0872	0.0089	0.0222	0.0105	0.0395	0.0043	0.0600	0.0460	0.0196	0.0336	0.0828	0.0232	0.0708	0.0836	0.2933	0.1345	0.1225	0.3618	0.0959	0.0589	0.2333	0.2004	0.1223	0.1801	0.1153	0.1538	0.0682	0.1191	0.1168	0.0417
OTU_51	P_Ascomycota	0.8168	0.5285	0.4759	0.5551	0.4490	0.4149	0.3795	0.2684	0.5069	0.4449	0.2863	0.4786	0.2238	0.2392	0.4356	0.2529	0.5514	0.2291	0.4659	0.3961	0.5771	0.2922	0.4842	0.4292	0.3004	0.3022	0.3527	0.3696	0.2966	0.5452	0.6320	0.3850
OTU_52	P_Ascomycota	0.2795	0.2389	0.3233	0.3156	0.4968	0.4539	0.3332	0.3438	0.6049	0.4051	0.3926	0.8551	0.6599	0.6017	0.4768	0.6701	0.5272	1.8664	0.3219	0.4377	0.2660	0.1658	0.2348	0.3574	0.2800	0.3523	0.3171	0.3715	0.3466	0.4124	0.3984	0.4779
OTU_53	D_Fungi	0.4818	0.0365	0.0206	0.0241	0.5335	0.1751	0.4796	0.2414	0.0970	0.1156	0.1679	0.1802	0.0543	0.3014	0.1828	0.0775	0.0286	0.0627	0.0000	0.0015	0.1744	0.0381	0.0671	0.0389	0.1332	0.0579	0.0831	0.3829	0.1125	0.1939	0.1494	0.2845
OTU_54	G_Epicoccum	1.1529	1.3952	1.1721	1.6084	0.5846	0.4015	2.9390	0.2684	1.6366	0.6425	0.8943	1.0447	0.4089	0.4247	0.6722	0.1356	1.0863	1.0677	0.8848	0.5286	1.2153	0.3241	2.8628	0.3828	1.5875	0.6295	0.9733	0.6150	3.1974	0.6859	1.1817	0.5538
OTU_55	G_Pochonia	0.9457	0.7684	0.5606	0.5260	0.7313	0.4929	0.7766	0.5378	0.4569	0.4089	0.2182	0.5324	0.1591	0.1648	0.2133	1.4441	0.4822	0.2241	0.4592	0.7504	0.3213	0.1756	0.3281	0.3604	0.2827	0.4087	0.3103	0.5042	0.3181	0.5678	0.4826	0.3489
OTU_56	G_Exophiala	2.0926	0.9876	1.0765	0.6261	0.8480	0.8259	0.9870	0.9183	1.3957	0.8177	0.4868	0.6359	1.0118	0.6908	0.4912	0.8332	1.7696	0.6205	1.8167	2.0294	0.8795	1.0768	1.9178	2.4017	1.2898	1.0022	0.6495	0.9005	0.6670	1.0019	0.8430	1.4242
OTU_57	G_Mortierella	0.4947	0.2268	0.1259	0.2091	1.9984	0.2483	0.0395	0.2220	1.4377	1.2079	2.1793	0.3805	0.7996	0.5797	0.4392	0.5079	0.1395	0.0946	0.0485	0.0089	0.1759	0.2812	0.0642	0.0688	0.2623	0.1629	0.0933	0.1003	0.1227	0.1122	0.1295	0.1840
OTU_58	C_Dothideomycetes	0.1199	0.3458	0.2167	0.3409	0.6524	0.2731	0.2785	2.0187	0.4459	0.2933	0.2881	0.3361	0.3067	0.2136	0.5055	0.2570	0.2318	0.0448	0.0970	0.3008	0.2311	0.0626	0.2158	0.0299	0.2338	0.4150	0.3442	0.1098	0.7806	0.3533	0.2309	0.0683
OTU_59	G_Mortierella	0.1735	0.1331	0.2821	0.7224	0.4457	0.2464	0.1001	0.1164	0.0120	0.1429	0.0615	0.0511	0.0194	0.0793	0.3065	0.1346	0.2406	0.0946	0.0889	0.0060	0.0538	0.0454	0.0583	0.0060	0.1101	0.3617	0.3442	0.1289	0.1011	0.3484	0.0770	0.1707
OTU_60	G_Fusarium	0.3618	0.5960	0.5497	0.5830	0.4324	0.2797	0.5410	0.4958	0.7038	0.5555	0.4280	0.9922	0.4503	0.5809	0.4759	0.3937	0.1845	0.0418	0.1158	0.1846	0.7109	0.0835	0.3063	0.2587	0.8644	0.5043	0.9615	0.3724	0.6942	0.3996	0.5469	0.3888
OTU_61	G_Mortierella	1.3036	1.1488	0.8355	0.7630	1.2926	0.8231	1.4615	0.6488	1.4547	1.4217	1.1181	0.6373	0.5848	0.7567	2.5276	3.4808	0.9864	0.9173	4.5410	0.8993	0.6309	0.2443	0.4171	0.5817	0.3140	0.2427	1.0836	1.2052	0.2738	0.4202	0.6683	3.1045
OTU_62	P_Ascomycota	0.7950	0.6391	0.6708	0.5678	0.7058	0.4900	0.4956	0.2479	0.7728	0.8898	1.3186	0.7704	0.5641	0.7371	1.2701	1.1963	0.7348	0.6175	1.1905	1.0244	0.7734	0.5243	1.1346	1.0737	0.6225	0.7611	0.6342	1.1355	0.7192	1.6406	1.4252	1.1474
OTU_63	F_Mortierellaceae	0.1289	0.0871	0.0981	0.2649	0.2445	0.2874	0.1018	0.2048	0.8648	0.4561	0.4047	0.6104	0.8811	2.0857	0.8515	0.5793	0.1571	0.2151	0.2047	0.1668	0.0378	0.0589	0.1065	0.0583	0.2433	0.0767	0.4952	0.2311	0.1239	0.1092	0.5587	0.0512
OTU_64	G_Ophiosphaerella	0.5393	0.7918	0.4044	0.5792	0.1356	0.2255	0.1313	0.3363	0.6419	1.3720	0.6304	1.0003	0.1281	0.2258	0.0896	0.2968	5.9194	1.3914	2.2301	1.7316	1.1775	0.9970	1.0675	2.2342	1.5005	1.4282	1.6482	1.4038	1.6566	2.7979	2.1216	1.7334
OTU_65	G_Microdochium	1.9073	2.5731	2.8129	2.2370	1.0625	1.5662	1.7779	0.6876	1.7226	1.7635	2.1867	1.9052	4.4510	1.1704	1.2521	1.7052	3.0207	2.4142	3.6306	2.2751	2.2722	2.9198	1.9076	3.0657	3.1437	2.5620	2.1722	2.7427	1.9816	2.1966	3.3404	2.6778
OTU_66	C_Sordariomycetes	0.1051	0.2108	0.0375	0.2117	0.1178	0.0923	0.1716	0.1627	0.4699	0.3865	0.1511	0.3442	0.2213	0.2026	0.3397	0.1744	0.0571	0.0777	0.0875	0.1429	0.1323	0.0921	0.1225	0.2767	0.4553	0.3383	0.6698	0.3438	0.4443	0.3592	0.3278	0.3831
OTU_67	G_Dioszegia	0.0099	0.0037	0.0242	0.0101	0.0078	0.0057	0.0236	0.0108	0.0040	0.0062	0.0149	0.0148	0.0078	0.0049	0.0117	0.0020	0.0297	0.0498	0.0296	0.0462	0.0393	0.0221	0.1254	0.0583	0.0258	0.0094	0.0017	0.0057	0.0454	0.0246	0.0136	0.0038
OTU_68	G_Dokmaia	0.7236	0.8611	1.3429	0.8023	1.0303	1.1076	1.0467	1.1791	0.9728	0.7233	0.7106	1.2759	0.9187	0.8653	1.0612	0.9128	1.3082	0.7191	1.4032	1.3534	1.5627	1.8295	1.9499	2.3763	0.7625	0.9333	0.6698	0.5758	0.6204	1.1259	0.7307	0.9387
OTU_69	D_Fungi	0.1289	0.0347	0.0920	0.0380	0.0778	0.0885	0.0909	0.0841	0.0170	0.0373	0.0037	0.0134	0.0168	0.0171	0.0108	0.0306	0.1208	0.0717	0.1131	0.0521	0.3634	0.0651	0.1473	0.0658	0.0326	0.0658	0.0102	0.0697	0.0261	0.0207	0.0272	0.0228
OTU_70	P_Ascomycota	0.0317	0.0281	0.0073	0.0177	0.0122	0.0076	0.0059	0.0032	0.0020	0.0062	0.0065	0.0175	0.0052	0.0024	0.0036	0.0041	0.0011	0.0020	0.0000	0.0000	0.0044	0.0000	0.0015	0.0015	0.0054	0.0031	0.0068	0.0086	0.0011	0.0049	0.0045	0.0076
OTU_71	G_Myrmecridium	0.2795	0.3992	0.2022	0.2700	0.0745	0.0752	0.3753	0.0701	0.1980	0.1255	0.0345	0.2783	0.2575	0.1123	0.0726	0.1112	0.2164	0.1066	0.3407	0.3365	0.2253	0.7342	0.1371	0.4412	0.0992	0.0611	0.0577	0.4498	0.0250	0.0541	0.0706	0.0834
OTU_72	C_Tremellomycetes	0.0050	0.0056	0.0097	0.0076	0.0067	0.0048	0.0118	0.0032	0.0000	0.0062	0.0093	0.0108	0.0078	0.0012	0.0090	0.0041	0.0066	0.0080	0.0121	0.0060	0.0102	0.0221	0.0204	0.0374	0.0041	0.0000	0.0000	0.0019	0.0159	0.0079	0.0009	0.0133
OTU_73	F_Helotiaceae	0.1824	0.3579	0.1308	0.2649	0.1367	0.0856	0.1430	0.0873	0.2669	0.3952	0.0737	0.6561	0.1786	0.1916	0.9841	0.0806	0.1395	0.0777	0.0189	0.1325	0.1366	0.1928	0.0992	0.1481	0.2025	0.1065	0.3052	0.2110	0.2647	0.1860	0.1693	0.1062
OTU_74	G_Preussia	0.0902	0.0843	0.0654	0.0558	0.0656	0.0618	0.0522	0.0377	0.1290	0.0783	0.0727	0.1102	0.0802	0.0342	0.0869	0.0948	0.0736	0.0369	0.0821	0.0715	0.0727	0.0774	0.0554	0.0942	0.1019	0.0799	0.1221	0.1175	0.1295	0.1014	0.1585	0.1043
OTU_75	O_Sporidiobolales	0.1437	0.1059	0.4178	0.0900	0.1034	0.0657	0.1321	0.0550	0.0590	0.2187	0.4495	0.2057	0.0725	0.0842	0.1488	0.0245	0.2493	0.2211	0.3542	0.3037	0.6614	0.4150	1.1667	0.9930	0.2528	0.0517	0.0763	0.0869	0.1818	0.1535	0.0987	0.0759
OTU_76	G_Dokmaia	0.0149	0.0572	0.0036	0.0279	0.0245	0.0219	0.0757	0.0075	0.6509	0.4014	0.4234	0.2218	0.1967	0.3014	0.1963	0.3651	0.0165	0.0110	0.0727	0.0774	0.0407	0.0049	0.0160	0.1585	0.0381	0.0391	0.0627	0.0592	0.0409	0.0522	0.0706	0.0834
OTU_77	O_Polyporales	0.0050	0.0075	0.0036	0.0063	0.0022	0.0086	0.0042	0.0043	0.0130	0.0075	0.0047	0.0054	0.0116	0.0073	0.0081	0.0102	0.0044	0.0040	0.0094	0.0015	0.0044	0.0061	0.0015	0.0075	0.0082	0.0047	0.0017	0.0057	0.0080	0.0148	0.0054	0.0133
OTU_78	D_Fungi	0.1209	0.0825	0.0714	0.0824	0.0500	0.0685	0.0438	0.0302	0.1960	0.0634	0.0392	0.0672	0.0220	0.0610	0.0403	0.0530	0.0989	0.0189	0.0646	0.0402	0.0567	0.0405	0.0408	0.0299	0.0652	0.0485	0.0695	0.0497	0.0568	0.0640	0.0679	0.0702
OTU_79	G_Filobasidium	0.0089	0.0056	0.0230	0.0025	0.0133	0.0076	0.0168	0.0108	0.0040	0.0162	0.0196	0.0309	0.0078	0.0110	0.0197	0.0051	0.0198	0.0050	0.0108	0.0164	0.0393	0.0626	0.1575	0.0942	0.0136	0.0063	0.0068	0.0076	0.0591	0.0197	0.0272	0.0152
OTU_80	G_Arthrographis	0.0367	0.0262	0.0291	0.0380	0.0411	0.0133	0.0362	0.0248	0.0230	0.0336	0.0121	0.0417	0.0181	0.0268	0.0143	0.0255	0.0417	0.0209	0.0512	0.0447	0.0407	0.0160	0.0365	0.0314	0.0068	0.0204	0.0102	0.0248	0.0500	0.0266	0.0335	0.0322
OTU_81	P_Ascomycota	0.1765	0.2305	0.1053	0.1762	0.0911	0.0657	0.0926	0.0884	0.2609	0.1827	0.1054	0.2944	0.1281	0.1111	0.1022	0.1132	0.1604	0.0627	0.0404	0.0715	0.0785	0.0368	0.0802	0.1092	0.1971	0.2302	0.1764	0.1986	0.1239	0.1388	0.0878	0.0891
OTU_82	P_Basidiomycota	2.3652	2.2423	2.5114	2.5982	2.1762	1.6747	1.4775	1.4496	3.4692	2.6309	2.6492	3.5481	2.4041	1.9527	1.9091	1.7266	2.2419	1.6463	3.7007	4.3209	2.1617	1.3653	2.3743	2.7187	2.3350	2.4320	2.6809	2.9203	2.2986	2.4210	2.8387	2.0994
OTU_83	G_Podosordaria	0.1358	0.0647	0.1526	0.2142	0.0367	1.5757	0.0387	15.5878	0.0120	0.3492	0.0214	0.0229	0.0233	0.0049	0.0045	0.0235	0.0297	0.0378	0.0108	0.0045	7.8123	0.0749	0.0073	7.5491	0.1767	0.2051	0.2306	0.0105	10.8546	1.4447	0.0072	0.0891
OTU_84	D_Fungi	0.0416	0.0272	0.0751	0.0596	0.0433	0.0381	0.0404	0.0302	0.1160	0.1230	0.0877	0.0820	0.0608	0.0513	0.0565	0.0694	0.0857	0.0339	0.0902	0.1087	0.0393	0.0454	0.1138	0.0688	0.0951	0.1237	0.1136	0.0993	0.1023	0.0738	0.1096	0.0569
OTU_85	G_Mortierella	7.7519	1.8338	4.9452	1.8264	4.8081	7.1736	1.8923	4.3499	0.6659	2.5899	8.9437	0.8228	4.3915	1.9649	3.3334	3.0106	1.0457	2.1025	4.1154	1.4517	1.6921	0.7441	2.1380	0.6072	0.5042	0.8911	0.2255	1.9376	0.2148	1.6022	0.5768	1.0544
OTU_86	G_Mortierella	10.9618	7.5834	16.3468	9.0418	12.0492	14.3357	8.0488	14.3732	10.9486	11.2071	8.1464	8.6935	11.7395	10.2833	17.0836	10.8595	9.1740	3.7887	7.7595	8.1698	6.7802	4.8425	10.2656	7.5132	9.5725	15.3170	18.4308	16.7856	9.4024	10.5194	13.8948	10.0588
OTU_87	G_Exophiala	0.0040	0.0440	0.0048	0.0748	0.0445	0.0266	0.0328	0.0097	0.0930	0.0435	0.0187	0.0403	0.0375	0.0708	0.0376	0.2244	0.0022	0.0030	0.0000	0.0045	0.0029	0.0012	0.0015	0.0015	0.0000	0.0016	0.0000	0.0000	0.0011	0.0000	0.0009	0.0019
OTU_88	P_Ascomycota	0.0109	0.0469	0.0121	0.0393	0.0256	0.0209	0.0034	0.0140	0.0150	0.0025	0.0028	0.0323	0.0104	0.0061	0.0063	0.0010	0.0088	0.0000	0.0391	0.2010	0.0073	0.0086	0.0088	0.1166	0.0204	0.0282	0.0034	0.0038	0.0023	0.1033	0.0109	0.0607
OTU_89	G_Cladosporium	0.0525	0.3364	0.0884	0.1559	0.0422	0.0409	0.1700	0.0463	0.1640	0.1603	0.4094	0.1345	0.0893	0.0744	0.0466	0.0255	0.1856	0.3376	0.2895	0.2501	0.1483	0.1547	0.3325	0.1884	0.1998	0.1221	0.1238	0.0945	0.1932	0.3494	0.1005	0.0398
OTU_90	G_Rhodotorula	0.1745	0.0806	0.1417	0.0710	0.0789	0.0438	0.0522	0.0269	0.0390	0.0336	0.0270	0.0605	0.0168	0.0513	0.0125	0.0337	0.2856	0.0767	0.9898	0.8651	0.1585	0.0737	0.2056	0.4561	0.0394	0.0532	0.0356	0.0926	0.0545	0.0551	0.0290	0.0815
OTU_91	P_Basidiomycota	0.0307	0.0234	0.0315	0.0114	0.0378	0.0200	0.0269	0.0162	0.0220	0.0249	0.0159	0.0013	0.0116	0.0146	0.0072	0.0122	0.0044	0.0070	0.0094	0.0119	0.0087	0.0135	0.0044	0.0045	0.0177	0.0141	0.0237	0.0201	0.0091	0.0049	0.0118	0.0152
OTU_92	C_Tremellomycetes	0.7405	1.4889	1.7025	0.7490	0.6469	1.8812	0.7110	0.3460	0.9638	0.6736	0.5455	0.3912	0.4555	0.4723	0.4571	0.3682	0.2988	0.1703	0.2599	0.3693	0.2893	0.1068	0.1706	0.1839	0.3126	0.5027	0.3781	0.4937	0.4170	0.3631	0.3423	0.1915
OTU_93	D_Fungi	0.0872	0.0197	0.0121	0.0101	0.0167	0.0266	0.0126	0.0065	0.0220	0.0050	0.0037	0.0081	0.0272	0.0171	0.0099	0.0204	0.0253	0.0050	0.0000	0.0045	0.0044	0.0037	0.0058	0.0179	0.0136	0.0047	0.0017	0.0019	0.0091	0.0256	0.0054	0.0417
OTU_94	G_Cryptococcus	0.0040	0.0056	0.0048	0.0089	0.0189	0.0067	0.0236	0.0151	0.0070	0.0261	0.0187	0.0323	0.0168	0.0171	0.0394	0.0092	0.0077	0.0050	0.0215	0.0283	0.1018	0.0774	0.2290	0.2228	0.0054	0.0047	0.0051	0.0029	0.1409	0.0571	0.0616	0.0322
OTU_95	G_Mortierella	1.4721	0.6297	2.7620	0.5133	0.9636	1.7641	0.7160	0.6855	0.4509	1.1682	1.4109	0.3576	0.4464	1.4706	0.9815	0.8750	0.4229	2.0198	0.4215	0.3350	0.3605	0.2898	0.3661	0.1944	0.3004	0.3132	2.1824	0.4393	0.4261	3.2093	1.3872	0.7643
OTU_96	F_Mucoraceae	0.0605	0.0487	0.0533	0.0431	0.0345	0.0923	0.0236	0.0151	0.0820	0.1218	0.1063	0.0981	0.0518	0.0256	0.0179	0.0173	0.0791	0.1374	0.1118	0.0432	0.0596	0.0172	0.0394	0.0239	0.2147	0.1582	0.0763	0.2292	0.0841	0.1506	0.1729	0.0626
OTU_97	D_Fungi	0.2230	0.1687	0.1974	0.1850	0.1367	0.1142	0.1119	0.0873	0.2140	0.4635	0.1259	0.2286	0.2458	0.0415	0.4231	0.0724	0.3021	0.0647	0.4565	0.3573	0.1599	1.2020	0.3238	0.1735	0.1291	0.1018	0.1017	0.1967	0.0591	0.0827	0.0715	0.1309
OTU_98	P_Basidiomycota	0.0496	0.0656	0.0569	0.0482	0.0278	0.0276	0.0395	0.0205	0.0090	0.2635	0.0513	0.0834	0.0259	0.0244	0.0412	0.0092	0.2263	0.2121	0.3515	0.4303	0.2035	0.1510	0.3456	0.2722	0.2827	0.0987	0.1323	0.0668	0.1079	0.0620	0.0480	0.0284
OTU_99	G_Acremonium	0.0486	0.0759	0.0242	0.0976	0.0267	0.0304	0.0202	0.0410	0.0810	0.0286	0.0308	0.1008	0.0285	0.0415	0.0843	0.0347	0.0362	0.0239	0.0148	0.0164	0.0625	0.0147	0.0233	0.0254	0.1250	0.0940	0.0865	0.0974	0.0659	0.0896	0.0516	0.0417
OTU_100	G_Bionectria	0.0268	0.0562	0.0061	0.0215	0.0100	0.0304	0.0496	0.0129	0.0140	0.0087	0.0065	0.0188	0.0142	0.0024	0.0054	0.0082	0.0033	0.0040	0.0040	0.0208	0.0029	0.0012	0.0000	0.0030	0.0068	0.0157	0.0119	0.0201	0.0045	0.0108	0.0054	0.0095
OTU_101	G_Cladosporium	6.8736	12.5862	9.5502	10.2357	2.7886	3.9565	9.3816	3.3853	4.0721	4.8827	5.4057	7.5171	2.0909	1.6049	3.7170	0.7241	11.0666	33.7503	14.9642	20.6248	12.6735	13.7553	14.4293	10.7733	19.4224	7.3978	8.1869	4.9993	10.8659	5.1392	5.1351	3.4553
OTU_102	P_Basidiomycota	0.0228	0.0187	0.0327	0.0177	0.0311	0.0181	0.0294	0.0140	0.0110	0.0261	0.0028	0.0148	0.0104	0.0049	0.0027	0.0061	0.0077	0.0070	0.0094	0.0045	0.0044	0.0049	0.0088	0.0060	0.0054	0.0125	0.0136	0.0095	0.0057	0.0079	0.0063	0.0133
OTU_103	P_Ascomycota	0.0099	0.0019	0.0024	0.0127	0.0022	0.0048	0.0067	0.0022	0.0190	0.0112	0.0065	0.0040	0.0065	0.0037	0.0009	0.0092	0.0044	0.0060	0.0121	0.0208	0.0131	0.0012	0.0029	0.0209	0.0122	0.0063	0.0085	0.0229	0.0273	0.0187	0.0109	0.0266
OTU_104	G_Phaeosphaeria	0.0079	0.0084	0.0036	0.0152	0.0011	0.0114	0.0076	0.0140	0.0100	0.0075	0.0112	0.0202	0.0349	0.0171	0.0108	0.0082	0.0022	0.0080	0.0040	0.0045	0.0000	0.0000	0.0044	0.0224	0.0082	0.0063	0.0034	0.0076	0.0000	0.0089	0.0118	0.0019
OTU_105	G_Phoma	0.1427	0.1003	0.2107	0.1521	0.1456	0.0856	0.1321	0.0582	0.1630	0.1342	0.1790	0.4195	0.0349	0.0293	0.0762	0.0214	2.0584	1.5308	1.7884	1.1480	0.9609	0.8153	1.7734	0.7687	0.9827	0.3304	0.5392	0.3104	0.4534	0.2401	0.6438	0.1403
OTU_106	G_Mortierella	5.4670	5.1874	8.1504	5.2586	5.8695	7.4448	6.7211	9.2764	9.4249	12.1155	10.3070	6.4617	11.7900	9.6267	11.1518	20.9165	8.9016	6.6620	2.1453	1.0661	7.1029	5.9844	4.8448	1.5224	9.7479	13.1262	12.6823	13.0211	6.6152	10.2842	9.1899	6.5712
OTU_107	G_Mrakiella	0.2161	0.2661	0.1865	0.4056	0.1956	0.1618	0.0774	0.1444	0.5959	0.4325	0.5782	1.0420	0.5344	0.1037	0.1371	0.4202	0.1450	0.1643	0.2680	0.5569	0.0567	0.0393	0.1910	0.1765	0.2800	0.1957	0.2798	0.4221	0.1125	0.2008	0.1856	0.2048
OTU_108	C_Dothideomycetes	0.0634	0.5941	0.0073	0.1001	0.0022	0.1361	0.0025	0.0237	0.0930	0.0224	0.0401	0.0457	0.0259	0.0073	0.0242	0.0071	0.6623	0.4024	0.2411	2.0324	0.8054	0.1056	0.2581	0.1137	0.1033	0.0501	0.0220	0.0067	0.0875	0.0217	0.0100	0.0076
OTU_109	D_Fungi	0.0079	0.0066	0.0061	0.0038	0.0122	0.0057	0.0126	0.0086	0.0090	0.0025	0.0037	0.0013	0.0052	0.0000	0.0036	0.0041	0.0198	0.0100	0.0040	0.0030	0.0058	0.0000	0.0058	0.0015	0.0014	0.0031	0.0000	0.0029	0.0011	0.0049	0.0018	0.0019
OTU_110	G_Ambispora	0.2290	0.0731	0.0811	0.0456	0.0178	0.0076	0.0076	0.0604	0.0380	0.1168	0.2089	0.0928	0.0065	0.0134	0.0009	0.0133	0.0593	0.0388	0.0350	0.0074	0.0116	0.0086	0.0117	0.0015	0.0381	0.0188	0.0051	0.0382	0.0080	0.0069	0.0045	0.0076
OTU_111	D_Fungi	0.0089	0.0056	0.0000	0.0013	0.0111	0.0038	0.0042	0.0065	0.0060	0.0050	0.0037	0.0027	0.0065	0.0037	0.0018	0.0092	0.0198	0.0060	0.0067	0.0030	0.0029	0.0037	0.0015	0.0120	0.0027	0.0047	0.0000	0.0019	0.0023	0.0059	0.0063	0.0076
OTU_112	D_Fungi	0.0258	0.0066	0.0061	0.0051	0.0078	0.0067	0.0118	0.0280	0.0280	0.0062	0.0000	0.0013	0.0000	0.0049	0.0027	0.0071	0.0231	0.0060	0.0040	0.0074	0.0015	0.0074	0.0044	0.0135	0.0054	0.0031	0.0000	0.0010	0.0023	0.0059	0.0009	0.0038
OTU_113	G_Cylindrocarpon	0.3549	0.4488	0.3124	1.2484	0.3812	0.5452	0.6782	0.1681	0.3179	0.2833	0.0905	0.1976	0.1669	0.2673	0.1667	0.1795	0.1153	0.1604	0.1764	0.2487	0.1148	0.1068	0.2815	0.1017	0.2147	0.1566	0.2255	0.1977	0.1477	0.1880	0.1938	0.1726
OTU_114	G_Stachybotrys	0.0287	0.1940	0.0085	0.1546	0.0289	0.0352	0.0185	0.0162	0.0170	0.0012	0.0019	0.4208	0.0026	0.0195	0.0081	0.0061	0.0154	0.0010	0.0054	0.2338	0.0233	0.0111	0.0117	0.6834	0.0326	0.0485	0.0424	0.0143	0.0091	0.1378	0.0163	0.0133
OTU_115	G_Exophiala	0.0059	0.0028	0.0061	0.0469	0.0667	0.0552	0.0261	0.0593	0.0580	0.0373	0.0522	0.0215	0.6172	0.0696	0.0143	0.0653	0.0132	0.0100	0.1522	0.0238	0.0102	0.1093	0.0321	0.0374	0.0231	0.0047	0.0203	0.1127	0.0614	0.0187	0.0308	0.0360
OTU_116	D_Fungi	0.0040	0.0009	0.0036	0.0038	0.0167	0.0219	0.0278	0.0140	0.0020	0.0025	0.0093	0.0040	0.0091	0.0183	0.0251	0.0245	0.0077	0.0020	0.0404	0.0298	0.0567	0.0454	0.1371	0.1974	0.0014	0.0016	0.0034	0.0029	0.0045	0.0157	0.0127	0.0266
OTU_117	D_Fungi	0.0416	0.0075	0.0048	0.0089	0.0100	0.0143	0.0118	0.0550	0.0390	0.0124	0.0019	0.0081	0.0091	0.0098	0.0045	0.0275	0.0956	0.0129	0.0067	0.0104	0.0305	0.0147	0.0190	0.0254	0.0150	0.0031	0.0034	0.0086	0.0102	0.0079	0.0036	0.0436
OTU_118	D_Fungi	0.0169	0.0112	0.0230	0.0101	0.0056	0.0029	0.0076	0.0097	0.0070	0.0050	0.0065	0.0054	0.0078	0.0073	0.0045	0.0143	0.0044	0.0070	0.0081	0.0670	0.0131	0.0025	0.0263	0.0060	0.0122	0.0047	0.0153	0.0048	0.0034	0.0010	0.0000	0.0019
OTU_119	G_Verticillium	0.1973	0.0112	0.0363	0.0139	0.0422	0.0238	0.0353	0.0711	0.0990	0.0249	0.0578	0.1761	0.0311	0.0744	0.0367	0.0663	0.1054	0.1135	0.0512	0.0685	0.0640	0.0553	0.0438	0.1196	1.3361	0.9318	1.6075	1.7447	0.3318	0.4625	0.4111	0.1877
OTU_120	D_Fungi	0.0714	0.0094	0.0170	0.0089	0.0144	0.0295	0.0210	0.0205	0.0180	0.0174	0.0056	0.0067	0.0091	0.0159	0.0108	0.0306	0.2373	0.0896	0.0714	0.0194	0.0538	0.0233	0.0335	0.0165	0.0231	0.0188	0.0017	0.0115	0.0148	0.0079	0.0091	0.0076
OTU_121	P_Ascomycota	0.0040	0.0094	0.0012	0.0076	0.0044	0.0029	0.0101	0.0022	0.0140	0.0174	0.0103	0.0188	0.0039	0.0061	0.0143	0.0051	0.0033	0.0040	0.0108	0.0074	0.0015	0.0049	0.0277	0.0389	0.0014	0.0078	0.0136	0.0105	0.0057	0.0118	0.0172	0.0152
OTU_122	G_Nigrospora	0.0010	0.0150	0.0194	0.1356	0.0156	0.0238	0.0093	0.0043	0.0420	0.0137	0.0056	0.0578	0.0362	0.0207	0.0063	0.0041	0.0033	0.0000	0.0027	0.0060	0.0044	0.0000	0.0088	0.0030	0.0054	0.0063	0.0051	0.0019	0.0023	0.0030	0.0036	0.0000
OTU_123	P_Ascomycota	0.0040	0.0375	0.0145	0.0177	0.0133	0.0162	0.0101	0.0086	0.0390	0.0447	0.0056	0.0309	0.0828	0.0085	0.0269	0.0510	0.0736	0.0528	0.0202	0.0610	0.0015	0.0025	0.0831	0.0239	0.0367	0.0987	0.0814	0.0325	0.0454	0.0413	0.0172	0.0114
OTU_124	D_Fungi	0.1358	0.0197	0.0085	0.0051	0.0111	0.0200	0.0160	0.1293	0.1170	0.0087	0.0019	0.0067	0.0078	0.0110	0.0072	0.0612	0.0780	0.0080	0.0013	0.0074	0.0131	0.0098	0.0088	0.1495	0.1264	0.0110	0.0000	0.0134	0.0045	0.0266	0.0181	0.1688
OTU_125	D_Fungi	0.0397	0.0084	0.0048	0.0063	0.0044	0.0143	0.0185	0.0151	0.0340	0.0149	0.0019	0.0054	0.0013	0.0146	0.0054	0.0214	0.0220	0.0050	0.0067	0.0074	0.0044	0.0160	0.0160	0.0404	0.0082	0.0063	0.0017	0.0019	0.0034	0.0089	0.0091	0.0379
OTU_126	D_Fungi	0.0059	0.0028	0.0109	0.0013	0.0133	0.0162	0.0126	0.0119	0.0030	0.0025	0.0084	0.0067	0.0000	0.0122	0.0054	0.0061	0.0110	0.0020	0.0498	0.0402	0.0407	0.0344	0.0758	0.0778	0.0068	0.0219	0.0153	0.0105	0.0068	0.0069	0.0063	0.0209
OTU_127	D_Fungi	0.0159	0.0028	0.0012	0.0038	0.0011	0.0105	0.0059	0.0075	0.0290	0.0162	0.0047	0.0054	0.0142	0.0073	0.0036	0.0122	0.0022	0.0000	0.0013	0.0000	0.0000	0.0000	0.0015	0.0015	0.0109	0.0094	0.0017	0.0038	0.0000	0.0000	0.0027	0.0000
OTU_128	D_Fungi	0.0010	0.0000	0.0000	0.0076	0.0111	0.0029	0.0017	0.0054	0.0090	0.0062	0.0075	0.0175	0.0039	0.0281	0.0027	0.0173	0.0022	0.0070	0.0296	0.0223	0.0058	0.0037	0.0088	0.0075	0.0204	0.0094	0.0051	0.0048	0.0159	0.0079	0.0054	0.0000
OTU_129	P_Basidiomycota	0.0089	0.0037	0.0521	0.0152	0.0022	0.1941	0.1077	0.0011	0.0060	0.0025	0.0000	0.0027	0.0078	0.0232	0.0036	0.0031	0.0000	0.0000	0.0013	0.0000	0.0015	0.0012	0.0000	0.0000	0.0000	0.0000	0.0000	0.0000	0.0000	0.0000	0.0000	0.0000
OTU_130	P_Ascomycota	0.0178	0.0131	0.0012	0.0076	0.0311	0.0133	0.0017	0.0086	0.0370	0.0360	0.0159	0.0471	0.0440	0.0183	0.0188	0.0357	0.0450	0.0508	0.1899	0.1638	0.0174	0.0688	0.4521	0.2378	0.0204	0.0188	0.0203	0.0134	0.0409	0.0177	0.0208	0.0133
OTU_131	D_Fungi	0.0139	0.0047	0.0024	0.0025	0.0167	0.0019	0.0034	0.0119	0.0070	0.0062	0.0075	0.0094	0.0104	0.0098	0.0009	0.0031	0.0022	0.0000	0.0135	0.0030	0.0058	0.0012	0.0029	0.0060	0.0082	0.0047	0.0034	0.0067	0.0068	0.0089	0.0036	0.0057
OTU_132	C_Sordariomycetes	0.3103	0.0319	0.0061	0.0342	0.0211	0.0124	0.0067	0.0086	0.0410	0.0025	0.0000	0.0040	0.0388	0.0012	0.0224	0.0357	0.0099	0.0149	0.4484	0.7623	0.0145	0.0098	0.0613	0.6131	0.0449	0.0063	0.0237	0.0172	0.0193	0.0069	0.0072	0.0095
OTU_133	G_Mucor	0.0040	0.0019	0.0012	0.0025	0.0056	0.0086	0.0084	0.0022	0.0070	0.0112	0.0028	0.0094	0.0129	0.0110	0.0054	0.0061	0.0000	0.0020	0.0000	0.0015	0.0000	0.0012	0.0000	0.0030	0.0027	0.0000	0.0017	0.0000	0.0011	0.0020	0.0009	0.0038
OTU_134	G_Oligoporus	0.1160	0.0628	0.0521	0.0444	0.0867	0.0476	0.0867	0.0334	0.0080	0.0224	0.0047	0.0000	0.0142	0.0073	0.0000	0.0000	0.0472	0.0080	0.0323	0.0104	0.0523	0.0184	0.0117	0.0165	0.0054	0.0063	0.0051	0.0134	0.0091	0.0000	0.0018	0.0019
OTU_135	D_Fungi	0.0089	0.0037	0.0024	0.0127	0.0100	0.0228	0.1052	0.0194	0.0040	0.0037	0.0009	0.0027	0.0078	0.0073	0.0018	0.0031	0.0143	0.0020	0.0027	0.0045	0.0116	0.0074	0.0088	0.0000	0.0054	0.0047	0.0000	0.0057	0.0068	0.0079	0.0118	0.0076
OTU_136	G_Phaeomyces	0.0069	0.0056	0.0012	0.0038	0.0044	0.0019	0.0000	0.0000	0.0090	0.0311	0.2686	0.0134	0.0039	0.0317	0.0009	0.0133	0.0022	0.0000	0.3623	0.0119	0.0000	0.0172	0.0000	0.0209	0.0041	0.0235	0.0119	0.0038	0.1023	0.0049	0.0426	0.4248
OTU_137	D_Fungi	0.7187	0.0675	0.0908	0.0127	0.0689	0.0923	0.2667	0.0582	0.0130	0.0410	0.0149	0.0013	0.0078	0.0256	0.0099	0.0000	0.0209	0.0120	0.0000	0.0000	0.0015	0.0012	0.0073	0.0000	0.0095	0.0016	0.0068	0.0029	0.0011	0.0000	0.0000	0.0057
OTU_138	D_Fungi	0.0783	0.0253	0.0157	0.0342	0.0156	0.0285	0.0959	0.0162	0.0010	0.0149	0.0019	0.0000	0.0686	0.0134	0.0009	0.0020	0.0011	0.0000	0.0000	0.0000	0.0000	0.0000	0.0000	0.0000	0.0000	0.0000	0.0000	0.0029	0.0000	0.0000	0.0009	0.0000
OTU_139	G_Geomyces	0.6394	0.7431	0.7810	0.4753	0.5024	0.5557	0.4796	0.2630	0.1950	0.3331	0.1026	0.3348	0.1165	0.6163	0.1595	0.2244	0.5767	1.5597	0.6087	0.5986	0.5742	0.3217	0.3850	0.5683	0.2800	0.3022	0.3612	0.3915	0.2182	0.3415	0.2798	0.4608
OTU_140	P_Ascomycota	0.0010	0.0037	0.0012	0.2915	0.1289	0.0285	0.0522	0.6618	0.0810	0.0099	0.0513	0.1358	0.1087	0.0415	0.0206	0.1836	0.0000	0.0020	0.0000	0.0000	0.0029	0.0000	0.0000	0.0015	0.0041	0.0000	0.0051	0.0067	0.0250	0.0030	0.0407	0.0019
OTU_141	G_Glomus	0.0119	0.0028	0.0085	0.0089	0.0189	0.0048	0.0101	0.0011	0.0080	0.0087	0.0084	0.0040	0.0052	0.0134	0.0018	0.0010	0.0011	0.0000	0.0000	0.0000	0.0000	0.0000	0.0000	0.0000	0.0000	0.0016	0.0000	0.0000	0.0000	0.0010	0.0000	0.0000
OTU_142	P_Ascomycota	1.8726	0.3345	0.1066	0.0748	0.5446	0.1960	0.7867	0.2317	0.1710	1.2949	0.1007	0.3603	3.4224	0.1391	0.1828	0.0337	0.0769	0.2012	0.0754	0.0640	0.5161	9.6802	0.1721	0.1256	0.0951	0.0517	0.5460	0.0277	0.1466	0.2765	0.0779	1.0449
OTU_143	G_Cryptococcus	0.0050	0.0037	0.0412	0.0114	0.0022	0.0029	0.0008	0.0043	0.0770	0.0684	0.0877	0.0350	0.0039	0.0207	0.0081	0.0031	0.0000	0.0000	0.0013	0.0000	0.0000	0.0000	0.0000	0.0000	0.0000	0.0016	0.0000	0.0000	0.0000	0.0000	0.0000	0.0000
OTU_144	G_Pyrenochaeta	0.0763	0.0197	0.0254	0.2167	0.1412	0.0894	0.0505	0.0356	0.1380	0.0112	0.0979	0.0094	0.1126	0.0561	0.0618	0.0398	0.0143	0.0319	0.0067	0.0164	0.0393	0.0454	0.0117	0.0314	0.0639	0.0125	0.0254	0.0420	0.0534	0.0581	0.0353	0.0095
OTU_145	G_Lewia	0.0486	0.1162	0.0194	0.0976	0.0278	0.0133	0.0337	0.0474	0.0190	0.0050	0.0149	0.2971	0.0233	0.0232	0.0296	0.0051	0.0209	0.0239	0.0310	0.2531	0.0872	0.0184	0.0408	0.4486	0.0489	0.0360	0.0271	0.0076	0.0454	0.0354	0.0190	0.0284
OTU_146	G_Periconia	0.0496	0.3476	0.0944	0.2687	0.1200	0.0438	0.0926	0.1186	0.0510	0.0708	0.0401	0.1694	0.2251	0.3124	0.1613	0.1183	0.1856	0.0179	0.0875	0.2621	0.1439	0.2001	0.1342	0.5339	0.2514	0.1660	0.1136	0.2683	0.2659	0.4399	0.2427	0.1934
OTU_147	D_Fungi	0.0079	0.0309	0.0024	0.0025	0.0378	0.0647	0.0656	0.0237	0.0000	0.0000	0.0009	0.0027	0.0052	0.0134	0.0027	0.0000	0.0099	0.0030	0.0000	0.0000	0.0131	0.0037	0.0029	0.0000	0.0000	0.0047	0.0000	0.0038	0.0045	0.0000	0.0018	0.0019
OTU_148	P_Ascomycota	0.1953	0.0553	0.3088	0.4322	0.0322	0.0152	0.2642	0.0744	0.0260	0.2001	0.0662	0.1291	0.0530	0.2124	0.0843	0.2121	1.4928	0.0817	0.7690	0.0134	0.0393	0.0675	0.0627	0.0314	0.0856	0.0219	0.0271	0.0754	0.0773	0.1102	0.0290	0.0455
OTU_149	D_Fungi	0.0337	0.0037	0.0024	0.0063	0.0033	0.0105	0.0160	0.0119	0.0270	0.0062	0.0037	0.0027	0.0039	0.0207	0.0081	0.0224	0.0769	0.0090	0.0175	0.0208	0.0073	0.0209	0.0190	0.0688	0.0285	0.0078	0.0068	0.0076	0.0023	0.0089	0.0100	0.0209
OTU_150	G_Phoma	1.5910	1.0073	1.5753	1.5260	1.2337	1.1228	1.3429	1.2265	2.3835	1.5186	1.5377	2.0248	1.6458	1.3730	1.5094	1.1616	0.9457	0.8974	1.5621	1.5917	0.8693	0.9675	1.8974	1.7676	1.1363	0.8597	1.1327	1.0400	1.6328	1.4831	1.9124	1.1986
OTU_151	D_Fungi	0.1180	0.0019	0.0000	0.0038	0.0000	0.0733	0.1279	0.1530	0.0140	0.2958	0.0336	0.0027	0.0466	0.0598	0.0242	0.0897	0.0945	0.0110	0.0081	0.0000	0.0000	0.0221	0.0365	0.0030	0.0163	0.0078	0.0373	0.0048	0.0182	0.0217	0.1431	0.2124
OTU_152	G_Funneliformis	1.8081	0.5238	0.8403	1.0292	0.8869	0.2084	0.4039	0.2856	0.0950	0.0099	0.0121	0.3240	0.1799	0.2880	0.0914	0.0082	0.2032	0.0219	0.0013	0.0045	0.5146	0.0810	0.0015	0.0060	0.0598	0.0188	0.0102	0.2168	0.0523	0.1338	0.2137	0.1517
OTU_153	G_Glomus	0.1527	0.0628	0.1792	0.0456	0.2623	0.0647	0.2440	0.0237	0.0520	0.1504	0.0960	0.0363	0.0582	0.2514	0.0134	0.0592	0.0198	0.0020	0.0040	0.0030	0.0058	0.0000	0.0175	0.0000	0.0000	0.0031	0.0017	0.0095	0.0136	0.0079	0.0045	0.0190
OTU_154	G_Plectosphaerella	0.2310	0.0768	0.0654	0.0558	0.0700	0.0828	0.0639	0.1261	0.1370	0.0808	0.0988	0.1385	0.1760	0.1428	0.0816	0.0938	0.1186	0.0687	1.7008	0.5420	1.0249	0.0933	0.1006	0.1690	0.5314	2.3365	0.4036	0.4861	0.2557	0.1830	0.2228	0.2503
OTU_155	D_Fungi	0.0069	0.0056	0.0048	0.0038	0.0067	0.0038	0.0084	0.0022	0.0010	0.0025	0.0103	0.0054	0.0026	0.0012	0.0054	0.0020	0.0099	0.0060	0.0067	0.0000	0.0218	0.0061	0.0029	0.0075	0.0068	0.0110	0.0051	0.0086	0.0102	0.0059	0.0063	0.0114
OTU_156	G_Cryptococcus	0.0000	0.0019	0.0109	0.0063	0.0044	0.0029	0.0025	0.0000	0.0080	0.0025	0.0056	0.0027	0.0142	0.0110	0.0009	0.0031	0.0000	0.0000	0.0000	0.0000	0.0044	0.0000	0.0029	0.0015	0.0014	0.0000	0.0017	0.0000	0.0000	0.0010	0.0000	0.0000
OTU_157	G_Entrophospora	0.0337	0.0150	0.0182	0.0203	0.0067	0.0038	0.0303	0.0604	0.0000	0.0025	0.0084	0.0013	0.0039	0.0146	0.0134	0.0031	0.0000	0.0000	0.0000	0.0060	0.0000	0.0000	0.0000	0.0000	0.0000	0.0016	0.0000	0.0000	0.0000	0.0000	0.0018	0.0019
OTU_158	G_Pyrenochaeta	0.0783	0.0309	0.0085	0.0000	0.0089	0.0190	0.0118	0.0086	0.0060	0.0099	0.0000	0.0000	0.0039	0.0049	0.0027	0.0020	0.0011	0.0010	0.0000	0.0000	0.0029	0.0049	0.0000	0.0254	0.0068	0.0031	0.0000	0.0019	0.0000	0.0266	0.0063	0.0000
OTU_159	D_Fungi	0.0000	0.0122	0.0279	0.0165	0.0078	0.0105	0.0000	0.0086	0.0120	0.0099	0.0009	0.0027	0.0026	0.0037	0.0000	0.0153	0.0472	0.0279	0.0135	0.0030	0.0145	0.0123	0.0175	0.0179	0.0204	0.0047	0.0000	0.0917	0.0125	0.0039	0.0009	0.0095
OTU_160	O_Pezizales	0.0109	0.0262	0.0400	0.0773	0.0089	0.0019	0.0143	0.0205	0.0000	0.0062	0.0112	0.0000	0.0492	0.0317	0.0565	0.0071	0.0275	0.0777	0.4915	0.1504	0.0596	0.0025	0.9509	0.0165	0.0516	0.0204	0.0051	0.0315	0.1625	0.0964	0.0217	0.6543
OTU_161	G_Harpophora	0.0020	0.0000	0.0012	0.0063	0.0000	0.0029	0.0067	0.0022	0.0140	0.0000	0.0009	0.0255	0.0026	0.0037	0.0018	0.0031	0.0231	0.0050	0.0808	0.0298	0.0160	0.0098	0.0117	0.2183	0.0557	0.0579	0.0187	0.0248	0.0193	0.0305	0.0100	0.0000
OTU_162	D_Fungi	0.0129	0.0066	0.0097	0.0089	0.0044	0.0247	0.0227	0.0054	0.0010	0.0062	0.0037	0.0040	0.0000	0.0049	0.0063	0.0010	0.0055	0.0080	0.0054	0.0000	0.0160	0.0061	0.0088	0.0030	0.0054	0.0063	0.0085	0.0086	0.0114	0.0089	0.0100	0.0152
OTU_163	O_Xylariales	0.0030	0.0066	0.0012	0.0013	0.0345	0.0209	0.0362	0.0237	0.0020	0.0025	0.0037	0.0067	0.0026	0.0073	0.0072	0.0000	0.0319	0.0050	0.0741	0.0342	0.1846	0.1007	0.1721	0.0912	0.0204	0.0517	0.0170	0.0544	0.1000	0.0551	0.0091	0.0379
OTU_164	P_Ascomycota	0.0040	0.0075	0.0024	0.0038	0.0067	0.0067	0.0008	0.0022	0.0050	0.0025	0.0103	0.0027	0.0052	0.0073	0.0018	0.0041	0.0055	0.0050	0.0054	0.0045	0.0015	0.0012	0.0015	0.0030	0.0136	0.0031	0.0254	0.0029	0.0057	0.0039	0.0226	0.0038
OTU_165	C_Sordariomycetes	0.0059	0.0216	0.0012	0.0215	0.0056	0.0067	0.0034	0.0032	0.0160	0.0000	0.0028	0.0686	0.0129	0.0049	0.0099	0.0031	0.0011	0.0030	0.0013	0.0462	0.0044	0.0000	0.0058	0.1286	0.0054	0.0204	0.0085	0.0086	0.0114	0.0187	0.0091	0.0038
OTU_166	D_Fungi	0.0050	0.0028	0.0024	0.0051	0.0089	0.0114	0.0042	0.0366	0.0020	0.0162	0.0000	0.0013	0.0155	0.0012	0.0027	0.0010	0.0011	0.0219	0.0417	0.0015	0.0000	0.0000	0.0000	0.0000	0.0041	0.0016	0.0000	0.0010	0.0011	0.0010	0.0009	0.0019
OTU_167	P_Glomeromycota	0.0218	0.0009	0.0145	0.0063	0.0389	0.0086	0.0084	0.0032	0.0020	0.0137	0.0131	0.0121	0.0065	0.0122	0.0027	0.0041	0.0011	0.0000	0.0000	0.0000	0.0000	0.0000	0.0029	0.0000	0.0027	0.0110	0.0034	0.0076	0.0000	0.0167	0.0027	0.0000
OTU_168	G_Cylindrocarpon	0.0050	0.0159	0.0048	0.0076	0.0000	0.0105	0.0084	0.0054	0.0080	0.0012	0.0019	0.0000	0.0052	0.0024	0.0009	0.0010	0.0011	0.0010	0.0000	0.0000	0.0000	0.0025	0.0015	0.0000	0.0136	0.0204	0.0119	0.0010	0.0114	0.0217	0.0127	0.0057
OTU_169	O_Hypocreales	0.0099	0.0037	0.0024	0.0089	0.0067	0.0038	0.0093	0.0011	0.0010	0.0037	0.0000	0.0229	0.0104	0.0012	0.0027	0.0041	0.0011	0.0010	0.0000	0.0074	0.0015	0.0000	0.0000	0.0060	0.0000	0.0000	0.0017	0.0010	0.0000	0.0069	0.0009	0.0000
OTU_170	G_Trichoderma	0.2429	0.1162	1.3332	0.0938	0.3112	0.0771	0.2861	0.0679	0.0840	0.0286	0.0224	0.0659	2.6797	1.2033	0.3558	0.1438	0.0571	0.0647	0.0431	0.1236	0.0436	0.0332	0.0452	0.1331	0.0421	0.0376	0.0373	0.0382	0.0409	0.0541	0.0589	0.0247
OTU_171	D_Fungi	0.0089	0.0047	0.0012	0.0038	0.0011	0.0000	0.0008	0.0022	0.0110	0.0062	0.0028	0.0054	0.0039	0.0024	0.0018	0.0031	0.1417	0.0199	0.0135	0.0045	0.0116	0.0111	0.0175	0.0135	0.0666	0.0157	0.0017	0.0057	0.0170	0.0049	0.0027	0.0190
OTU_172	P_Ascomycota	0.0565	0.0403	0.0194	0.0241	0.0322	0.0314	0.0404	0.0248	0.0090	0.0298	0.0037	0.0081	0.0052	0.0122	0.0009	0.0020	0.0066	0.0010	0.0000	0.0015	0.0044	0.0012	0.0000	0.0000	0.0082	0.0016	0.0136	0.0076	0.0023	0.0030	0.0091	0.0000
OTU_173	D_Fungi	0.0704	0.0206	0.0424	0.0570	0.0467	0.0362	0.0463	0.0410	0.1100	0.0733	0.0550	0.0807	0.0686	0.2136	0.0367	0.0571	0.0835	0.0249	0.2141	0.1087	0.1643	0.0405	0.3004	0.1974	0.1672	0.1362	0.0695	0.0802	0.0227	0.0325	0.0353	0.0417
OTU_174	C_Chytridiomycetes	0.0000	0.0047	0.0036	0.0063	0.0144	0.0029	0.0101	0.0108	0.0020	0.0050	0.0187	0.0000	0.0116	0.0061	0.0063	0.0000	0.0000	0.0020	0.0000	0.0000	0.0000	0.0000	0.0000	0.0000	0.0000	0.0047	0.0017	0.0000	0.0023	0.0059	0.0018	0.0019
OTU_175	D_Fungi	0.0109	0.0759	0.0327	0.0266	0.0322	0.0333	2.5915	0.0571	0.0150	0.0323	0.5231	0.0296	0.0272	0.1318	1.5900	0.1948	0.0022	0.0060	0.0081	0.0089	0.0378	0.0233	0.0131	0.1331	0.0054	0.2083	0.0051	0.0038	0.0034	0.0217	0.0244	1.5722
OTU_176	G_Metarhizium	0.0406	0.0403	0.0630	0.0393	0.0834	0.0352	0.0151	0.0216	0.0780	0.0646	0.2909	0.0403	0.1177	0.0122	0.0896	0.0153	0.0033	0.0020	0.0027	0.0134	0.0000	0.0000	0.0029	0.0015	0.0136	0.0047	0.0068	0.0057	0.0080	0.0079	0.0118	0.0095
OTU_177	G_Leptosphaeria	0.0159	0.0037	0.0109	0.0000	0.7569	0.0190	0.0185	0.0065	0.0000	0.0112	0.0028	0.0027	0.0155	0.0195	0.0036	0.0031	0.0088	0.0100	0.0067	0.0074	0.0131	20.7588	0.0219	0.0165	0.0014	0.0016	0.0000	0.0000	0.0068	0.0207	0.0072	0.0076
OTU_178	F_Pyronemataceae	0.0079	0.0187	0.0387	0.0646	0.0044	0.0333	0.0320	0.0043	0.0050	0.0037	0.0047	0.0040	0.0181	0.0000	0.0000	0.0337	0.0000	0.0000	0.0000	0.0000	0.0015	0.0000	0.0000	0.0000	0.0000	0.0000	0.0000	0.0048	0.0000	0.0000	0.0000	0.0000
OTU_179	C_Sordariomycetes	0.0307	1.8235	0.0024	0.3473	0.0044	0.0048	1.9891	0.0022	0.0020	0.0000	0.0019	0.0040	0.0026	0.0000	0.0036	0.0041	0.0439	0.0269	0.0687	0.0402	0.0145	0.0098	1.0952	1.9785	0.0014	0.0078	1.1989	0.0000	0.0045	0.0010	0.0027	0.0000
OTU_180	P_Ascomycota	0.0456	0.9417	0.0036	0.0292	0.0067	0.0000	0.0093	0.0108	0.0050	0.0025	0.0037	0.0027	0.0052	0.0000	0.0000	0.0000	0.0143	0.0398	0.0148	0.0268	4.5182	0.0442	0.0350	0.0508	0.0924	0.0532	0.0475	0.0057	0.0239	0.0098	0.0045	0.0057
OTU_181	D_Fungi	0.0089	0.0000	0.0024	0.0000	0.0111	0.0152	0.0067	0.0075	0.0050	0.0025	0.0000	0.0040	0.0078	0.0012	0.0036	0.0122	0.0000	0.0000	0.0000	0.0000	0.0015	0.0000	0.0000	0.0030	0.0027	0.0031	0.0017	0.0000	0.0034	0.0118	0.0009	0.0019
OTU_182	D_Fungi	0.0486	0.0084	0.0266	0.0507	0.0222	0.0238	0.0118	0.0205	0.1370	0.0721	0.0643	0.1183	0.0686	0.0293	0.0798	0.0571	0.0330	0.0269	0.0566	0.0432	0.0611	0.0430	0.0554	0.1077	0.0353	0.0517	0.0678	0.0487	0.0125	0.0207	0.0299	0.0133
OTU_183	D_Fungi	0.0020	0.0019	0.0048	0.0051	0.0245	0.0171	0.0244	0.0151	0.0010	0.0025	0.0037	0.0040	0.0065	0.0159	0.0108	0.0071	0.0077	0.0030	0.0364	0.0238	0.0509	0.0307	0.0773	0.1316	0.0014	0.0000	0.0000	0.0010	0.0000	0.0098	0.0163	0.0038
OTU_184	D_Fungi	0.0268	0.0300	0.0182	0.0127	0.0189	0.0247	0.0252	0.0237	0.0080	0.0199	0.0084	0.0040	0.0091	0.0037	0.0054	0.0020	0.0351	0.0090	0.0027	0.0372	0.0843	0.0528	0.0277	0.0135	0.0150	0.0235	0.0509	0.0267	0.0318	0.0197	0.0326	0.0360
OTU_185	P_Ascomycota	0.0555	0.0019	0.0000	0.0089	0.0233	0.0010	0.0034	0.0043	0.4679	0.2299	0.7115	0.2339	0.1307	0.1111	0.1586	0.1275	0.1362	0.0050	0.0970	0.0462	0.0291	0.0012	0.0219	0.1600	0.0353	0.2145	0.1899	2.0446	0.0000	0.0059	0.0516	0.0171
OTU_186	G_Holtermanniella	0.1269	0.1874	0.2398	0.2167	0.1367	0.0885	0.1397	0.1078	0.2719	0.2809	0.1996	0.2003	0.2200	0.2783	0.1667	0.0367	0.1022	0.4850	0.1616	0.1668	0.2864	0.2136	0.3281	0.4098	0.3072	0.0532	0.1136	0.1079	0.3886	0.1309	0.0706	0.0778
OTU_187	D_Fungi	0.0040	0.0009	0.0012	0.0051	0.0022	0.0067	0.0025	0.0011	0.0210	0.0062	0.0019	0.0403	0.0129	0.0061	0.0009	0.0112	0.0044	0.0000	0.0000	0.0015	0.0015	0.0061	0.0073	0.0269	0.0068	0.0110	0.0017	0.0010	0.0091	0.0089	0.0027	0.0019
OTU_188	P_Ascomycota	0.0119	0.0028	0.0836	0.0114	0.1045	0.0961	0.1481	0.0399	0.0000	0.0012	0.0009	0.0013	0.0104	0.0085	0.0054	0.0051	0.0253	0.0080	0.0108	0.0164	0.1599	0.0749	0.0613	0.0523	0.0068	0.0031	0.0051	0.0010	0.0170	0.0167	0.0081	0.0057
OTU_189	D_Fungi	0.0059	0.0009	0.0073	0.0051	0.0022	0.0067	0.0059	0.0054	0.0090	0.0037	0.0019	0.0013	0.0026	0.0000	0.0018	0.0071	0.0110	0.0040	0.0067	0.0045	0.0058	0.0061	0.0044	0.0075	0.0109	0.0078	0.0017	0.0029	0.0000	0.0010	0.0036	0.0133
OTU_190	G_Funneliformis	0.1338	0.0478	0.0557	0.0469	0.0333	0.0086	0.0286	0.0205	0.0000	0.0000	0.0000	0.0148	0.0091	0.0171	0.0000	0.0000	0.0187	0.0010	0.0000	0.0000	0.0058	0.0037	0.0000	0.0000	0.0014	0.0000	0.0000	0.0095	0.0034	0.0010	0.0081	0.0095
OTU_191	P_Ascomycota	0.0159	0.0009	0.0012	0.0672	0.0889	0.0438	0.0059	0.7027	0.0020	0.0025	0.4513	0.0040	0.2057	0.0244	0.0036	0.0459	0.0011	0.0000	0.0013	0.0000	0.0000	0.0098	0.0000	0.0015	0.0000	0.0000	0.0000	0.0000	0.0125	0.0000	0.0172	0.0019
OTU_192	O_Helotiales	0.0426	0.0590	0.1066	0.0127	0.0144	0.0304	0.0185	0.0054	0.0390	0.0982	0.0112	0.1129	0.0246	0.0171	0.0072	0.0051	0.0253	0.2171	0.0296	0.0074	0.1483	0.1449	0.0321	0.0120	1.1118	0.0345	0.2900	0.0544	0.2841	0.0905	0.0109	0.0152
OTU_193	D_Fungi	0.0000	0.0037	0.0073	0.0114	0.0500	0.0057	0.0050	0.0054	0.0010	0.0012	0.0000	0.0040	0.0052	0.0012	0.0036	0.0051	0.0055	0.0020	0.0067	0.0000	0.0029	0.0074	0.0073	0.0000	0.0014	0.0110	0.0000	0.0019	0.0057	0.0000	0.0009	0.0019
OTU_194	D_Fungi	0.0357	0.0028	0.0024	0.0000	0.0056	0.0105	0.0050	0.0183	0.0220	0.0162	0.0019	0.0040	0.0039	0.0024	0.0063	0.0082	0.0077	0.0020	0.0040	0.0030	0.0000	0.0000	0.0029	0.0045	0.0041	0.0016	0.0000	0.0019	0.0000	0.0010	0.0018	0.0000
OTU_195	G_Funneliformis	0.1695	0.0056	0.0073	0.0368	0.4724	0.3245	0.6100	0.2576	0.0240	0.1678	0.0998	0.3630	0.4231	0.1867	0.0816	0.4997	0.5547	0.0030	0.0633	0.0149	0.1977	0.2173	0.3471	0.4501	0.0163	0.2600	0.0170	0.1404	0.1500	0.9950	0.2372	0.2029
OTU_196	P_Ascomycota	0.0099	0.0056	0.0557	0.0000	0.0967	0.0428	0.0900	0.0614	0.0040	0.0000	0.0000	0.0000	0.0388	0.0293	0.0188	0.0010	0.0000	0.0000	0.0000	0.0000	0.0015	0.0037	0.0000	0.0000	0.0000	0.0000	0.0000	0.0029	0.0034	0.0020	0.0036	0.0000
OTU_197	C_Sordariomycetes	0.2409	0.3045	0.2022	0.2852	0.1723	0.1760	0.1371	0.0765	0.4609	0.1926	0.2331	0.4840	0.1139	0.2124	0.2716	0.2580	0.1560	0.2380	0.5346	0.4258	0.2239	0.1412	0.1692	0.3978	0.2827	0.3398	0.2493	0.3572	0.3318	0.4330	0.1956	0.2674
OTU_198	P_Ascomycota	0.0278	0.0375	0.0012	0.0000	0.0400	0.0019	0.0017	0.0000	0.0310	0.0808	0.0121	0.0511	0.0078	0.0012	0.0099	0.1061	0.0000	0.0040	0.0040	0.0000	0.0015	0.0000	0.0000	0.0000	0.0000	0.0000	0.0034	0.0000	0.0000	0.0000	0.0009	0.0000
OTU_199	D_Fungi	0.0169	0.0037	0.0170	0.0076	0.0089	0.0114	0.0126	0.0032	0.0380	0.0460	0.0317	0.0323	0.0246	0.0427	0.0143	0.0184	0.0176	0.0050	0.0296	0.0268	0.0494	0.0344	0.0919	0.0598	0.1346	0.0235	0.0237	0.0229	0.0034	0.0098	0.0045	0.0114
OTU_200	P_Ascomycota	0.0050	0.2539	0.0000	0.0013	0.0411	0.0837	0.0017	0.0032	0.0010	0.0025	0.0028	0.0000	0.1139	0.0220	0.0977	0.0041	0.0110	0.0000	0.0000	0.0074	0.0029	0.0025	0.0000	0.0030	0.0109	0.0063	0.0000	0.0010	0.0295	0.0856	0.0896	0.0057
OTU_201	D_Fungi	0.0892	0.0918	0.0230	0.0342	0.2434	0.1580	0.1397	0.1078	0.0560	0.0771	0.0168	0.0255	0.2562	0.1123	0.0260	0.1632	0.0110	0.0000	0.0013	0.0000	0.0000	0.0098	0.0029	0.0000	0.0163	0.0000	0.0000	0.0010	0.0591	0.0266	0.0208	0.0228
OTU_202	P_Ascomycota	0.0248	0.0412	0.0569	0.0253	0.0222	0.0266	0.0202	0.0075	0.0090	0.0149	0.0056	0.0040	0.0065	0.0085	0.0036	0.0020	0.0297	0.0080	0.0202	0.0015	0.0102	0.0061	0.0015	0.0000	0.0122	0.0188	0.0068	0.0038	0.0045	0.0039	0.0054	0.0057
OTU_203	D_Fungi	0.0000	0.0028	0.0036	0.0038	0.0122	0.0057	0.0101	0.0162	0.0010	0.0037	0.0019	0.0067	0.0013	0.0012	0.0117	0.0184	0.0000	0.0000	0.0067	0.0074	0.0073	0.0049	0.0117	0.0105	0.0000	0.0016	0.0017	0.0000	0.0057	0.0138	0.0000	0.0038
OTU_204	D_Fungi	0.0000	0.0066	0.0048	0.0000	0.0022	0.0038	0.0034	0.0022	0.0000	0.0037	0.0037	0.0067	0.0000	0.0000	0.0206	0.0010	0.0044	0.0000	0.0000	0.0000	0.0000	0.0000	0.0000	0.0000	0.0027	0.0000	0.0017	0.0029	0.0000	0.0000	0.0018	0.0019
OTU_205	G_Urocystis	0.0040	0.0103	0.0109	0.0076	0.0067	0.0067	0.0025	0.0140	0.0080	0.0087	0.0112	0.0081	0.0013	0.0085	0.0018	0.0061	0.0077	0.0040	0.0094	0.0074	0.0189	0.0000	0.0146	0.0015	0.0068	0.0047	0.0051	0.0038	0.0330	0.0049	0.0045	0.0152
OTU_206	G_Psathyrella	0.0327	0.0365	0.0533	0.0063	0.0556	0.0343	0.0236	0.0022	0.0060	0.0298	0.0019	0.0121	0.0026	0.0134	0.0117	0.0051	0.0044	0.0010	0.0000	0.0000	0.0029	0.0000	0.0000	0.0000	0.0014	0.0047	0.0051	0.0048	0.0057	0.0128	0.0027	0.0057
OTU_207	P_Ascomycota	0.0565	0.1602	0.0363	0.0608	0.0522	0.0476	0.0656	0.0356	0.0420	0.0597	0.0401	0.0780	0.0427	0.0268	0.0215	0.0071	0.2065	0.0159	0.0121	0.0119	0.2500	0.0098	0.0204	0.0179	0.0204	0.0063	0.0170	0.0353	0.0750	0.0335	0.0127	0.0322
OTU_208	G_Bolbitius	0.2865	0.1630	0.0000	0.0292	0.0211	0.0333	0.0000	0.0022	0.3849	0.0423	0.0047	0.0067	0.2963	0.0000	0.0108	0.0010	0.0154	0.0508	0.0000	0.0000	0.0480	0.0012	0.0029	0.0209	0.0027	0.0141	0.0017	0.0029	0.0000	0.0000	0.0000	0.0000
OTU_209	D_Fungi	0.0218	0.0028	0.0000	0.0063	0.0044	0.0010	0.0067	0.0108	0.0160	0.0037	0.0037	0.0040	0.0013	0.0073	0.0054	0.0173	0.0077	0.0060	0.0027	0.0030	0.0000	0.0025	0.0058	0.0120	0.0082	0.0047	0.0068	0.0086	0.0011	0.0030	0.0009	0.0133
OTU_210	P_Ascomycota	0.0030	0.0019	0.0085	0.0025	0.0000	0.0048	0.0008	0.0000	0.0160	0.0050	0.0075	0.0040	0.0026	0.0049	0.0018	0.0020	0.0011	0.0000	0.0000	0.0000	0.0000	0.0000	0.0000	0.0000	0.0000	0.0000	0.0000	0.0000	0.0000	0.0010	0.0000	0.0000
OTU_211	C_Agaricomycetes	0.0139	0.0047	0.0000	0.0101	0.0545	0.0171	0.0530	0.0269	0.1180	0.1914	0.2191	0.1721	0.0336	0.1721	0.4455	0.6344	0.0341	0.0378	0.0444	0.0060	0.0349	0.0135	0.0365	0.0150	0.0177	0.0391	0.0610	0.0869	0.0136	0.0689	0.1720	0.1176
OTU_212	D_Fungi	0.0010	0.0009	0.0024	0.0089	0.0044	0.0038	0.0017	0.0075	0.0230	0.0112	0.0187	0.0255	0.0104	0.0073	0.1085	0.0357	0.0011	0.0070	0.0054	0.0179	0.0087	0.0025	0.0073	0.0150	0.0082	0.0125	0.0085	0.0048	0.0034	0.0039	0.0054	0.0000
OTU_213	D_Fungi	0.0377	0.0066	0.0000	0.0000	0.0056	0.0038	0.0042	0.0194	0.0270	0.0050	0.0037	0.0013	0.0000	0.0037	0.0045	0.0184	0.0165	0.0060	0.0013	0.0030	0.0000	0.0000	0.0088	0.0179	0.0217	0.0063	0.0017	0.0010	0.0057	0.0079	0.0045	0.0474
OTU_214	G_Cheilymenia	0.1090	0.0197	0.0618	0.0013	0.0834	0.2550	0.0774	0.0075	0.0000	0.0062	0.0121	0.0067	0.0142	0.0024	0.0341	0.0377	0.0000	0.0269	0.0404	0.0074	0.0451	0.0111	0.0627	0.0224	0.0027	0.0125	0.0153	0.0000	0.0000	0.0000	0.0000	0.0133
OTU_215	G_Lachnella	0.0347	0.0009	0.0327	0.0482	0.1111	0.0067	0.0294	0.0022	0.0030	0.0000	0.0037	0.0390	0.0026	0.0012	0.0054	0.0041	0.0483	0.0139	0.2882	0.0968	0.0044	0.0332	0.0044	0.0523	0.0068	0.0501	0.0271	0.1156	0.1307	0.0295	0.0462	0.0000
OTU_216	D_Fungi	0.0862	0.0037	0.0133	0.0127	0.0211	0.0105	0.0008	0.0054	0.0000	0.0062	0.0019	0.0013	0.0078	0.0061	0.0000	0.0000	0.0121	0.0000	0.0000	0.0000	0.0029	0.0000	0.0015	0.0015	0.0150	0.0063	0.0051	0.0010	0.0477	0.0098	0.0081	0.0019
OTU_217	P_Ascomycota	0.0218	0.0103	0.0145	0.0076	0.0067	0.0076	0.0084	0.0032	0.0130	0.0485	0.0103	0.0040	0.0091	0.0061	0.0296	0.0510	0.0154	0.0538	0.0108	0.0119	0.0116	0.0074	0.0058	0.0239	0.0190	0.0125	0.0119	0.0076	0.0102	0.0098	0.0018	0.0057
OTU_218	C_Dothideomycetes	0.0020	0.0009	0.0000	0.0013	0.0067	0.0228	0.0076	0.0259	0.0030	0.0037	0.0056	0.0054	0.0246	0.0818	0.1712	0.0194	0.0000	0.0000	0.0000	0.0060	0.0015	0.0025	0.0029	0.0045	0.0082	0.0016	0.0000	0.0000	0.0102	0.0561	0.0353	0.0133
OTU_219	F_Pleosporaceae	0.0000	0.0131	0.0000	0.0051	0.0033	0.0086	0.0151	0.0000	0.0040	0.0149	0.0065	0.0108	0.0104	0.0012	0.0027	0.0000	0.0088	0.0129	0.0081	0.0253	0.0058	0.0000	0.0088	0.0060	0.0082	0.0094	0.0017	0.0000	0.0091	0.0020	0.0118	0.0038
OTU_220	G_Arthrinium	0.0040	0.0047	0.0036	0.0038	0.0000	0.0057	0.0042	0.0011	0.0180	0.0012	0.0019	0.0081	0.0052	0.0024	0.0009	0.0031	0.0044	0.0010	0.0000	0.0119	0.0015	0.0037	0.0015	0.0045	0.0041	0.0078	0.0051	0.0038	0.0011	0.0059	0.0063	0.0095
OTU_221	F_Lasiosphaeriaceae	0.0010	0.0759	0.0012	0.0114	0.0000	0.0029	0.0059	0.0054	0.0030	0.0124	0.0103	0.0094	0.0000	0.0024	0.0565	0.0010	0.0000	0.0000	0.0108	0.0119	0.0000	0.0000	0.0102	0.0030	0.0027	0.0000	0.0000	0.0000	0.0000	0.0000	0.0009	0.0000
OTU_222	G_Acremonium	0.0040	0.0075	0.0085	0.0000	0.0033	0.0067	0.0236	0.0011	0.0060	0.0012	0.0009	0.0108	0.0078	0.0207	0.0009	0.0051	0.0066	0.0030	0.0081	0.0402	0.0145	0.0086	0.0088	0.0299	0.0014	0.0094	0.0102	0.0086	0.0091	0.0030	0.0199	0.0019
OTU_223	C_Agaricomycetes	0.0010	0.0037	0.0012	0.0000	0.0022	0.0010	0.0000	0.0032	0.0650	0.0162	0.0121	0.0054	0.0026	0.0024	0.0018	0.0020	0.0143	0.0000	0.0283	0.0104	0.0145	0.0012	0.0146	0.0030	0.0068	0.0031	0.0017	0.0029	0.0023	0.0010	0.0063	0.0019
OTU_224	D_Fungi	0.0813	0.0169	0.0242	0.0152	0.0022	0.0105	0.0025	0.0151	0.0190	0.0261	0.0504	0.0229	0.0026	0.0037	0.0009	0.0041	0.0077	0.0149	0.0162	0.0000	0.0058	0.0012	0.0029	0.0000	0.0150	0.0110	0.0000	0.0153	0.0023	0.0010	0.0000	0.0019
OTU_225	P_Ascomycota	0.0020	0.0403	0.0000	0.0000	0.0033	0.0067	0.0008	0.0000	0.0510	0.0224	0.0196	0.0296	0.0220	0.0085	0.0045	0.0000	0.0000	0.0000	0.0013	0.0000	0.0000	0.0074	0.0015	0.0030	0.0068	0.0000	0.0000	0.0010	0.0034	0.0010	0.0000	0.0000
OTU_226	D_Fungi	0.0030	0.0028	0.0036	0.0025	0.0022	0.0095	0.0067	0.0032	0.0080	0.0012	0.0000	0.0013	0.0000	0.0037	0.0000	0.0020	0.0022	0.0000	0.0000	0.0000	0.0015	0.0000	0.0000	0.0000	0.0014	0.0000	0.0000	0.0010	0.0000	0.0000	0.0009	0.0171
OTU_227	G_Fusarium	0.0000	0.0187	0.0230	0.0038	0.0111	0.0019	0.0067	0.0000	0.0420	0.0286	0.0093	0.0188	0.0440	0.0098	0.0018	0.0000	0.0000	0.0000	0.0013	0.0030	0.0116	0.0037	0.0058	0.0000	0.0870	0.0298	0.0237	0.0191	0.0216	0.0000	0.0100	0.0095
OTU_228	G_Sphaerodes	0.0050	0.0094	0.0024	0.0051	0.0067	0.0067	0.0025	0.0054	0.0140	0.0025	0.0000	0.0081	0.0220	0.0232	0.0063	0.0122	0.0022	0.0020	0.0027	0.0179	0.0073	0.0025	0.0015	0.0209	0.0231	0.0172	0.0034	0.0038	0.0216	0.0118	0.0127	0.0702
OTU_229	O_Cystofilobasidiales	0.0030	0.0131	0.0061	0.0076	0.0122	0.0105	0.0084	0.0065	0.0090	0.0037	0.0047	0.0161	0.0065	0.0146	0.0081	0.0020	0.0198	0.0060	0.0350	0.0521	0.0523	0.0553	0.0817	0.1152	0.0122	0.0047	0.0102	0.0019	0.0193	0.0069	0.0063	0.0057
OTU_230	D_Fungi	0.0079	0.0056	0.0000	0.0025	0.0000	0.0019	0.0000	0.0043	0.0050	0.0025	0.0000	0.0054	0.0039	0.0012	0.0000	0.0031	0.0231	0.0030	0.0013	0.0000	0.0029	0.0025	0.0015	0.0000	0.0136	0.0000	0.0017	0.0029	0.0023	0.0010	0.0036	0.0057
OTU_231	P_Ascomycota	0.0089	0.0037	0.0496	0.0038	0.0133	0.0324	0.0185	0.0022	0.0010	0.0112	0.0075	0.0094	0.0957	0.0171	0.0099	0.0061	0.0483	0.0060	0.0027	0.0045	0.1730	0.0761	0.0219	0.0239	0.0122	0.0830	0.0068	0.0229	0.4318	0.0581	0.1014	0.0360
OTU_232	G_Thielaviopsis	0.0178	0.0056	0.0024	0.0139	0.1367	0.0057	0.0782	0.0151	0.0000	0.0000	0.0000	0.0000	0.0000	0.0110	0.0000	0.0000	0.0088	0.0010	0.0566	0.2531	0.0000	0.0000	0.0000	0.0344	0.0000	0.0000	0.0000	0.0038	0.0000	0.0000	0.0000	0.0000
OTU_233	D_Fungi	0.0139	0.0019	0.0000	0.0025	0.0022	0.0038	0.0059	0.0075	0.0160	0.0062	0.0000	0.0067	0.0039	0.0085	0.0036	0.0092	0.0044	0.0020	0.0054	0.0060	0.0015	0.0012	0.0088	0.0030	0.0082	0.0000	0.0034	0.0029	0.0011	0.0108	0.0027	0.0171
OTU_234	D_Fungi	0.0020	0.0000	0.0012	0.0000	0.0011	0.0057	0.0050	0.0043	0.0010	0.0000	0.0047	0.0040	0.0065	0.0085	0.0099	0.0010	0.0044	0.0010	0.0000	0.0000	0.0174	0.0098	0.0073	0.0060	0.0109	0.0125	0.0085	0.0048	0.0205	0.0059	0.0190	0.0038
OTU_235	G_Mortierella	3.0195	0.8855	1.6165	0.9937	3.3110	4.1924	2.6984	2.4929	0.8708	1.8902	3.6974	1.4117	2.5037	2.9815	2.1135	2.0265	0.8568	1.8605	2.4658	1.1852	0.9478	0.6716	0.9173	0.7866	0.6116	0.9490	1.2074	0.9903	1.2124	2.4052	4.7430	2.2113
OTU_236	G_Phaeosphaeria	0.0020	0.0056	0.0000	0.0038	0.0033	0.0010	0.0017	0.0011	0.0010	0.0000	0.0000	0.0013	0.0155	0.0000	0.0054	0.0031	0.0209	0.0667	0.0121	0.0134	0.5103	0.0246	0.0248	0.0224	0.0272	0.0031	0.0068	0.0010	0.0114	0.0157	0.0009	0.0152
OTU_237	P_Ascomycota	0.0000	0.0066	0.0000	0.0127	0.0011	0.0143	0.0000	0.0000	0.1980	0.0062	0.0065	0.0013	0.0893	0.0354	0.0403	0.0235	0.0000	0.0000	0.0000	0.0000	0.0000	0.0012	0.0000	0.0000	0.0530	0.0188	0.0119	0.2655	0.0114	0.0020	0.8503	0.0171
OTU_238	G_Actinomucor	0.0079	0.0300	0.0073	0.0342	0.0111	0.0114	0.0076	0.0280	0.0140	0.0211	0.0149	0.0148	0.0116	0.0256	0.0090	0.0173	0.1153	0.0010	0.0175	0.0030	0.0363	0.0074	0.0029	0.0075	0.0775	0.0673	0.0424	0.0220	0.1114	0.1122	0.0679	0.0948
OTU_239	C_Agaricomycetes	0.0129	0.0037	0.0194	0.0444	0.0000	0.0010	0.0000	0.0119	0.0290	0.0298	0.0093	0.0000	0.0142	0.0037	0.0000	0.0000	0.0813	0.0060	0.0027	0.0164	0.0087	0.0000	0.0102	0.0045	0.0054	0.0047	0.0000	0.0000	0.0011	0.0069	0.0036	0.0000
OTU_240	G_Debaryomyces	0.0040	0.0000	0.0012	0.0025	0.0022	0.0105	0.0017	0.0011	0.0060	0.0149	0.0196	0.0081	0.0000	0.0049	0.0081	0.0020	0.0011	0.0000	0.0000	0.0015	0.0000	0.0000	0.0000	0.0000	0.0000	0.0000	0.0000	0.0019	0.0000	0.0000	0.0000	0.0000
OTU_241	F_Nectriaceae	0.0010	0.0019	0.0000	0.0051	0.0022	0.0057	0.0025	0.0043	0.0040	0.0062	0.0028	0.0013	0.0065	0.0037	0.0072	0.0000	0.0044	0.0050	0.0377	0.0119	0.0015	0.0012	0.0044	0.0015	0.0340	0.0235	0.0882	0.0277	0.0045	0.0030	0.0054	0.0019
OTU_242	G_Hypocrea	0.0287	0.0084	0.0097	0.0317	0.0178	0.0143	0.0067	0.0474	0.0380	0.0112	0.0075	0.1829	0.0220	0.0110	0.0215	0.0306	0.0264	0.0179	0.0391	0.0655	0.0174	0.0233	0.0160	0.1092	0.0476	0.0251	0.0610	0.0602	0.0227	0.0541	0.0244	0.0322
OTU_243	G_Glomus	0.0000	0.0000	0.0061	0.0000	0.1189	0.0086	0.0202	0.0000	0.0000	0.0000	0.0308	0.0094	0.0142	0.0378	0.0538	0.0010	0.0000	0.0000	0.0027	0.0000	0.0552	0.0982	0.0671	0.0105	0.0014	0.0016	0.0000	0.0076	0.0000	0.0000	0.0054	0.0000
OTU_244	G_Monographella	0.0258	0.0647	0.0230	0.0292	0.0044	0.0057	0.0067	0.0032	0.0480	0.0112	0.0056	0.0336	0.0155	0.0037	0.0018	0.0000	0.3493	0.4492	0.5131	2.8960	0.2559	0.2333	0.1867	0.0823	0.8767	0.1049	0.1272	0.0516	0.7795	0.3336	0.0344	0.0322
OTU_245	F_Pyronemataceae	0.0109	0.0216	0.0109	0.0190	0.0133	0.0466	0.0564	0.0065	0.0000	0.0062	0.0000	0.0000	0.0181	0.0000	0.0009	0.0031	0.0000	0.0010	0.0000	0.0000	0.0000	0.0025	0.0000	0.0000	0.0041	0.0047	0.0000	0.0000	0.0000	0.0000	0.0000	0.0000
OTU_246	D_Fungi	0.0000	0.0037	0.0000	0.0013	0.0178	0.0171	0.0202	0.0065	0.0020	0.0000	0.0019	0.0040	0.0026	0.0110	0.0027	0.0082	0.0000	0.0000	0.0013	0.0000	0.0029	0.0074	0.0000	0.0060	0.0014	0.0000	0.0000	0.0010	0.0068	0.0010	0.0054	0.0133
OTU_247	P_Ascomycota	0.0605	0.0244	0.0012	0.0076	0.0044	0.0000	0.0050	0.0000	0.0020	0.0137	0.0009	0.0000	0.0336	0.0037	0.0197	0.0112	0.0198	0.0000	0.0013	0.0000	0.0029	0.0012	0.0000	0.0000	0.0000	0.0000	0.0017	0.0010	0.0000	0.0000	0.0000	0.0512
OTU_248	G_Glomus	0.0030	0.0000	0.0000	0.0000	0.0078	0.0000	0.0000	0.0011	0.0120	0.0286	0.0214	0.0121	0.0181	0.0122	0.0152	0.0439	0.0011	0.0000	0.0000	0.0000	0.0000	0.0000	0.0029	0.0000	0.0027	0.0000	0.0000	0.0038	0.0057	0.0079	0.0000	0.0000
OTU_249	D_Fungi	0.0268	0.0066	0.0012	0.0013	0.0000	0.0048	0.0025	0.0183	0.0230	0.0025	0.0009	0.0013	0.0013	0.0024	0.0036	0.0163	0.0286	0.0010	0.0000	0.0000	0.0000	0.0012	0.0015	0.0209	0.0313	0.0016	0.0034	0.0029	0.0045	0.0020	0.0018	0.0228
OTU_250	D_Fungi	0.0545	0.0150	0.0908	0.0292	0.0022	0.0038	0.0017	0.0011	0.0280	0.0025	0.0028	0.0067	0.0013	0.0037	0.0009	0.0010	0.0176	0.0020	0.0162	0.0045	0.0087	0.0074	0.0117	0.0075	0.0014	0.0031	0.0034	0.0143	0.0102	0.0030	0.0018	0.0076
OTU_251	P_Ascomycota	0.0069	0.0572	0.0036	0.0621	0.0022	0.0029	0.0025	0.0075	0.0140	0.0037	1.0957	0.0202	0.0091	0.0928	0.0242	0.0010	0.0055	0.0070	0.0000	0.0000	0.0611	0.0086	0.0058	0.0000	0.0761	0.1315	0.0356	0.0124	0.0170	0.0315	0.0217	0.0133
OTU_252	D_Fungi	0.0109	0.0047	0.0000	0.0038	0.0056	0.0010	0.0017	0.0054	0.0210	0.0037	0.0009	0.0027	0.0013	0.0012	0.0018	0.0133	0.0330	0.0070	0.0040	0.0060	0.0015	0.0074	0.0044	0.0269	0.0095	0.0031	0.0017	0.0048	0.0045	0.0069	0.0045	0.0114
OTU_253	D_Fungi	0.0198	0.0066	0.0012	0.0038	0.0078	0.0076	0.0076	0.0108	0.0080	0.0012	0.0009	0.0027	0.0013	0.0024	0.0045	0.0082	0.0066	0.0000	0.0027	0.0015	0.0029	0.0074	0.0058	0.0194	0.0041	0.0000	0.0000	0.0010	0.0000	0.0000	0.0000	0.0038
OTU_254	G_Glomus	0.0010	0.0000	0.0000	0.0000	0.0089	0.0000	0.0025	0.0000	0.0340	0.0323	0.0112	0.0255	0.0116	0.0330	0.0099	0.0245	0.0000	0.0000	0.0000	0.0000	0.0000	0.0000	0.0000	0.0000	0.0068	0.0000	0.0000	0.0010	0.0000	0.0000	0.0000	0.0000
OTU_255	G_Claroideoglomus	0.0000	0.0000	0.0000	0.0000	0.0033	0.0010	0.0050	0.0000	0.0320	0.0087	0.0755	0.0000	0.0039	0.0134	0.0063	0.0061	0.0000	0.0000	0.0000	0.0000	0.0058	0.0000	0.0000	0.0000	0.0082	0.0016	0.0034	0.0067	0.0023	0.0010	0.0054	0.0038
OTU_256	G_Septoglomus	0.0902	0.0141	0.0351	0.0304	0.1589	0.0181	0.0252	0.0431	0.0060	0.0286	0.0643	0.0457	0.0272	0.0268	0.0152	0.0224	0.0000	0.0000	0.0013	0.0015	0.0044	0.0012	0.0088	0.0000	0.0054	0.0000	0.0017	0.0258	0.0011	0.0364	0.0045	0.0057
OTU_257	O_Helotiales	0.0059	0.4516	0.0024	1.6515	0.0056	0.0029	0.1127	0.0011	0.3639	0.3107	0.4914	0.5244	0.2717	0.5431	0.1076	0.0337	0.0615	0.0438	0.6329	0.0953	0.1933	0.0049	0.8794	0.2438	0.0394	0.1190	0.1153	0.0764	0.0227	0.0689	0.1331	0.1441
OTU_258	D_Fungi	0.0099	0.0047	0.0012	0.0051	0.0133	0.0010	0.0067	0.0086	0.0010	0.0112	0.0131	0.0121	0.0000	0.0049	0.0072	0.0041	0.0143	0.0010	0.0000	0.0015	0.0029	0.0037	0.0044	0.0000	0.0014	0.0031	0.0034	0.0048	0.0023	0.0059	0.0054	0.0019
OTU_259	C_Tremellomycetes	0.0069	0.0131	0.0000	0.0000	0.0000	0.0000	0.0000	0.0000	0.0620	0.0385	0.0093	0.0040	0.0039	0.0122	0.0108	0.0020	0.0011	0.0020	0.0000	0.0000	0.0015	0.0000	0.0000	0.0000	0.0245	0.0407	0.0390	0.0306	0.0136	0.0030	0.0027	0.0057
OTU_260	G_Minimedusa	0.6969	0.7112	1.2956	0.9265	0.7391	0.1513	1.0332	0.5906	0.5809	0.4722	0.1790	0.1936	0.0556	0.1355	0.3908	0.1428	1.4181	0.7360	0.8915	0.1563	0.4507	0.4629	0.2654	0.4337	1.3021	0.8018	0.4714	0.4613	0.8420	0.6545	0.3269	0.2465
OTU_261	C_Agaricomycetes	0.0040	0.0122	0.0000	0.0038	0.0789	0.0143	0.0093	0.0226	0.0530	0.0000	0.0112	0.0000	0.0091	0.0037	0.0009	0.0000	0.0000	0.0000	0.0000	0.0000	0.0015	0.0012	0.0015	0.0000	0.0014	0.0016	0.0068	0.0000	0.0023	0.0000	0.0000	0.0000
OTU_262	F_Pezizaceae	0.0466	0.0225	0.0109	0.0000	0.0311	0.0038	0.0067	0.0011	0.0240	0.1690	0.0000	0.0081	0.0000	0.0915	0.0018	0.0010	0.0000	0.0020	0.0000	0.0194	0.0015	0.0000	0.0000	0.0000	0.0014	0.0579	0.0000	0.0076	0.0000	0.0069	0.0000	0.0000
OTU_263	D_Fungi	0.0228	0.0141	0.0073	0.0114	0.0300	0.0190	0.0160	0.0216	0.0180	0.0199	0.0140	0.0202	0.0181	0.0098	0.0090	0.0071	0.0066	0.0169	0.0121	0.0119	0.0029	0.0111	0.0015	0.0045	0.0068	0.0031	0.0102	0.0105	0.0068	0.0039	0.0045	0.0057
OTU_264	G_Peziza	0.0139	0.0028	0.0048	0.0000	0.0033	0.0343	0.0000	0.0043	0.0330	0.0534	0.0028	0.0390	0.0000	0.0024	0.2044	0.0041	0.0231	0.0010	0.0054	0.0015	0.0000	0.0000	0.0000	0.0015	0.0041	0.1034	0.0017	0.0344	0.0034	1.9574	0.5759	0.0038
OTU_265	G_Claroideoglomus	0.0020	0.0000	0.0000	0.0000	0.0067	0.0057	0.0084	0.0011	0.0560	0.0174	0.0933	0.0013	0.0039	0.0098	0.0108	0.0133	0.0000	0.0000	0.0000	0.0030	0.0015	0.0000	0.0000	0.0000	0.0068	0.0016	0.0085	0.0067	0.0023	0.0010	0.0145	0.0038
OTU_266	P_Basidiomycota	0.0000	0.0000	0.0145	0.0038	0.0000	0.0019	0.0059	0.0032	0.0140	0.0249	0.0410	0.0121	0.0129	0.0061	0.0108	0.0031	0.0000	0.0000	0.0000	0.0000	0.0000	0.0000	0.0000	0.0000	0.0000	0.0000	0.0000	0.0000	0.0000	0.0000	0.0000	0.0000
OTU_267	D_Fungi	0.0030	0.0028	0.0000	0.0063	0.0122	0.0086	0.0017	0.0129	0.0300	0.0124	0.1026	0.0444	0.0699	0.0305	0.0341	0.0602	0.0143	0.0239	0.0485	0.1146	0.0145	0.0209	0.0219	0.0972	0.0245	0.0251	0.0458	0.0201	0.0307	0.0217	0.0625	0.0436
OTU_268	C_Sordariomycetes	0.0000	0.0037	0.0000	0.0139	0.0011	0.0038	0.0050	0.0604	0.0040	0.0037	0.0009	0.0000	0.0000	0.0049	0.0036	0.0020	0.0000	0.0000	0.0000	0.0000	0.0000	0.0000	0.0000	0.0000	0.0000	0.0000	0.0000	0.0000	0.0000	0.0000	0.0000	0.0000
OTU_269	G_Candida	0.0208	0.1021	0.1296	0.0507	0.5502	0.1484	0.1750	0.0366	0.2070	0.3592	0.1753	1.4144	0.2161	2.3200	0.5754	1.2381	0.0044	0.0000	0.0000	0.0000	0.0000	0.0049	0.0000	0.0000	0.0082	0.0016	0.0017	0.0086	0.0011	0.0030	0.0027	0.0133
OTU_270	D_Fungi	0.0010	0.0019	0.0000	0.0152	0.0033	0.0000	0.0025	0.0022	0.0030	0.0000	0.0000	0.0013	0.0026	0.0012	0.0000	0.0031	0.0000	0.0010	0.0000	0.0000	0.0015	0.0012	0.0000	0.0000	0.0027	0.0016	0.0000	0.0057	0.0023	0.0000	0.0009	0.0019
OTU_271	G_Rhizophagus	0.0000	0.0000	0.0012	0.0000	0.0033	0.0133	0.0294	0.0000	0.0040	0.0037	0.0103	0.0067	0.0013	0.0000	0.0045	0.0235	0.0000	0.0000	0.0000	0.0000	0.0000	0.0012	0.0000	0.0000	0.0000	0.0000	0.0017	0.0010	0.0000	0.0020	0.0018	0.0000
OTU_272	D_Fungi	0.0000	0.0075	0.0012	0.0418	0.0033	0.0010	0.0008	0.0205	0.0020	0.0000	0.0364	0.0081	0.0000	0.7713	0.0215	0.0122	0.0000	0.0000	0.1508	0.0060	0.0044	0.0012	0.1108	0.0045	0.0054	0.0047	0.0000	0.0019	0.0000	0.0079	0.0018	0.0853
OTU_273	P_Basidiomycota	0.0000	0.0000	0.0012	0.0342	0.1500	0.0019	0.0000	0.0377	0.0570	0.0000	0.0000	0.0686	0.0142	0.0012	0.0000	0.0286	0.1746	0.0857	0.3340	0.9008	0.3213	0.1117	0.2494	0.5668	0.0938	0.1237	0.1645	0.2254	0.2738	0.2765	0.1929	0.0000
OTU_274	D_Fungi	0.0079	0.0281	0.0751	0.0393	0.0000	0.0000	0.0008	0.0162	0.0240	0.0137	0.0466	0.0242	0.0000	0.0293	0.0009	0.0000	0.0362	0.0110	0.0094	0.0000	0.0087	0.0025	0.0890	0.0045	0.1128	0.4197	0.4002	0.2015	0.0159	0.0020	0.0915	0.0209
OTU_275	D_Fungi	0.0198	0.0009	0.0157	0.0190	0.0367	0.0343	0.0269	0.0280	0.0160	0.0597	0.0131	0.0134	0.0181	0.0146	0.0520	0.0398	0.0132	0.0139	0.0189	0.0149	0.0349	0.0270	0.0175	0.0150	0.0082	0.0047	0.0119	0.0191	0.0159	0.0236	0.0353	0.0455
OTU_276	G_Glomus	0.0515	0.0112	0.1780	0.0127	0.1189	0.0343	0.1052	0.0119	0.0180	0.0410	0.0131	0.0202	0.0505	0.0903	0.0009	0.0347	0.0209	0.0000	0.0013	0.0000	0.0015	0.0000	0.0029	0.0000	0.0000	0.0031	0.0000	0.0000	0.0045	0.0010	0.0009	0.0057
OTU_277	G_Mortierella	0.0040	0.0000	0.0000	0.0101	0.0000	0.0019	0.0000	0.0011	0.0230	0.0112	0.0364	0.0000	0.0091	0.0073	0.0009	0.0041	0.0450	0.0000	0.0000	0.0030	0.0000	0.0025	0.0000	0.0060	0.1155	0.0172	0.0458	0.0277	0.0375	0.0049	0.0471	0.0398
OTU_278	D_Fungi	0.0198	0.0019	0.0000	0.0025	0.0000	0.0019	0.0034	0.0108	0.0080	0.0012	0.0019	0.0000	0.0026	0.0024	0.0018	0.0143	0.0121	0.0010	0.0054	0.0000	0.0000	0.0012	0.0015	0.0045	0.0122	0.0000	0.0017	0.0019	0.0000	0.0039	0.0045	0.0076
OTU_279	G_Trichocladium	0.0159	0.0066	0.0000	0.0000	0.0022	0.0000	0.0118	0.0065	0.0030	0.0012	0.0056	0.0229	0.0000	0.0012	0.0072	0.0020	0.0000	0.0000	0.0067	0.0015	0.0000	0.0000	0.0000	0.0135	0.0326	0.0016	0.0356	0.0000	0.0193	0.0187	0.0009	0.0000
OTU_280	D_Fungi	0.0278	0.0028	0.0012	0.0013	0.0011	0.0019	0.0042	0.0151	0.0070	0.0062	0.0019	0.0040	0.0039	0.0024	0.0027	0.0051	0.0132	0.0050	0.0094	0.0015	0.0029	0.0025	0.0015	0.0120	0.0095	0.0016	0.0017	0.0000	0.0011	0.0000	0.0027	0.0019
OTU_281	F_Herpotrichiellaceae	0.0287	0.0056	0.0024	0.0076	0.0511	0.0086	0.1464	0.0701	0.0030	0.0000	0.0103	0.0013	0.0298	0.0024	0.0009	0.0000	0.1175	0.0100	0.0121	0.0015	0.0131	0.1658	0.5819	0.0494	0.0177	0.0423	0.0017	0.0048	0.0023	0.0059	0.0009	0.0019
OTU_282	P_Basidiomycota	0.0050	0.0159	0.0642	0.0025	0.0100	0.0019	0.0042	0.0054	0.0170	0.0025	0.0009	0.0013	0.0039	0.0244	0.0027	0.0071	0.0395	0.0110	0.0040	0.0030	0.0000	0.0098	0.0073	0.0015	0.0027	0.0016	0.0034	0.0411	0.0023	0.0020	0.0036	0.0057
OTU_283	D_Fungi	0.0159	0.0009	0.0024	0.0013	0.0611	0.0799	0.0589	0.0280	0.0000	0.0025	0.0019	0.0040	0.0052	0.0012	0.0000	0.0000	0.0011	0.0000	0.0000	0.0000	0.0015	0.0012	0.0000	0.0000	0.0068	0.0000	0.0000	0.0000	0.0000	0.0000	0.0000	0.0000
OTU_284	D_Fungi	0.0040	0.0056	0.0121	0.0013	0.0044	0.0067	0.0194	0.0022	0.0280	0.0224	0.0308	0.0188	0.0142	0.0146	0.0063	0.0020	0.0132	0.0030	0.0229	0.0194	0.0276	0.0233	0.0583	0.0135	0.0163	0.0407	0.0254	0.0363	0.0295	0.0118	0.0127	0.0209
OTU_285	D_Fungi	0.0178	0.0000	0.0000	0.0038	0.0000	0.0019	0.0025	0.0054	0.0170	0.0012	0.0000	0.0027	0.0000	0.0024	0.0036	0.0133	0.0187	0.0030	0.0108	0.0045	0.0000	0.0012	0.0015	0.0224	0.0068	0.0016	0.0017	0.0067	0.0011	0.0010	0.0036	0.0019
OTU_286	O_Pleosporales	0.0099	0.0103	0.0375	0.0139	0.0300	0.0143	0.1085	0.0011	0.0210	0.0112	0.0196	0.0108	0.0116	0.0330	0.0099	0.0061	0.0011	0.0309	0.0027	0.0119	0.0116	0.0012	0.0204	0.0075	0.0027	0.0031	0.0034	0.0029	0.0091	0.0020	0.0036	0.0190
OTU_287	D_Fungi	0.0000	0.0000	0.0000	0.0000	0.0011	0.0000	0.0008	0.0334	0.1170	0.0236	0.0205	0.0807	0.0375	0.0818	0.0502	0.0173	0.0000	0.0000	0.0000	0.0000	0.0000	0.0012	0.0000	0.0000	0.0000	0.0016	0.0017	0.0019	0.0000	0.0030	0.0000	0.0000
OTU_288	G_Coprinellus	0.0050	0.0281	0.0085	0.1179	0.0545	0.0076	0.0101	0.0334	0.0000	0.0000	0.0000	0.0000	0.0026	0.0037	0.0000	0.0000	0.0000	0.0000	0.0552	0.0313	0.0000	0.0000	0.0029	0.0314	0.0000	0.0000	0.0000	0.0000	0.0011	0.0059	0.0887	0.0000
OTU_289	D_Fungi	0.0238	0.0009	0.0157	0.0190	0.0089	0.0133	0.0084	0.0054	0.0620	0.0497	0.0354	0.0726	0.0569	0.0195	0.2402	0.0581	0.0077	0.0120	0.0364	0.0134	0.0204	0.0184	0.0277	0.0419	0.0163	0.0219	0.0288	0.0248	0.0023	0.0128	0.0145	0.0095
OTU_290	D_Fungi	0.0050	0.0009	0.0000	0.0063	0.0000	0.0010	0.0025	0.0022	0.0050	0.0000	0.0000	0.0000	0.0000	0.0037	0.0018	0.0041	0.0110	0.0000	0.0013	0.0015	0.0015	0.0086	0.0029	0.0030	0.0068	0.0000	0.0017	0.0038	0.0023	0.0039	0.0018	0.0076
OTU_291	C_Chytridiomycetes	0.0535	0.0075	0.0533	0.0266	0.0889	0.0999	0.0766	0.0129	0.0120	0.0000	0.0075	0.0000	0.0142	0.0305	0.0072	0.0000	0.0077	0.0229	0.0027	0.0000	0.0378	0.0074	0.0044	0.0015	0.0000	0.0047	0.0000	0.0010	0.0091	0.0177	0.0009	0.0000
OTU_292	G_Mrakiella	0.0010	0.0047	0.0085	0.0013	0.0011	0.0038	0.0034	0.0043	0.0010	0.0025	0.0009	0.0054	0.0104	0.0024	0.0045	0.0010	0.0033	0.0080	0.0054	0.0060	0.0073	0.0049	0.0277	0.0150	0.0000	0.0000	0.0000	0.0010	0.0000	0.0000	0.0000	0.0000
OTU_293	G_Lewia	0.0050	0.0047	0.0000	0.0127	0.0022	0.0057	0.0000	0.0000	0.0010	0.0025	0.0000	0.0081	0.0000	0.0073	0.0045	0.0000	0.0066	0.0020	0.0000	0.0015	0.0131	0.0000	0.0058	0.0165	0.0014	0.0047	0.0000	0.0010	0.0102	0.0010	0.0009	0.0000
OTU_294	O_Glomerales	0.0000	0.0009	0.0000	0.0013	0.0622	0.0295	0.0682	0.0410	0.0060	0.0671	0.0578	0.0350	0.0207	0.0622	0.0475	0.0347	0.0033	0.0000	0.0000	0.0000	0.0015	0.0049	0.0000	0.0000	0.0068	0.0016	0.0000	0.0019	0.0057	0.0118	0.0199	0.0038
OTU_295	P_Ascomycota	0.0238	0.0234	0.0690	0.0000	0.1000	0.0228	0.0656	0.0000	0.0090	0.0621	0.0009	0.0040	0.0013	0.0061	0.0000	0.0000	0.2438	0.0189	0.0013	0.0000	0.0029	0.0000	0.0015	0.0000	0.0177	0.1159	0.0000	0.0000	0.0477	0.0453	0.0072	0.0000
OTU_296	P_Ascomycota	0.3390	0.8630	0.1114	0.5285	0.4390	0.1798	0.2003	0.0938	0.0850	0.0460	0.0345	0.0928	0.1268	0.0317	0.0959	0.0122	0.0319	0.0239	0.0337	0.0610	0.5117	0.0332	0.4477	0.0030	0.4689	0.2944	0.1289	3.0292	0.0068	0.1447	0.0145	0.1157
OTU_297	D_Fungi	0.0416	0.0000	0.0000	0.0000	0.1412	0.0904	0.0286	0.0162	0.0010	0.0000	0.0000	0.0000	0.0233	0.0207	0.0099	0.0000	0.0231	0.0020	0.0000	0.0000	0.0131	0.0491	0.1371	0.0000	0.0027	0.0063	0.0000	0.0038	0.0125	0.0197	0.0163	0.0019
OTU_298	F_Chionosphaeraceae	0.0020	0.0028	0.0085	0.0824	0.0011	0.0010	0.0034	0.0011	0.0300	0.0075	0.2042	0.0013	0.0052	0.0049	0.0152	0.0112	0.0000	0.0010	0.0337	0.0000	0.0000	0.0012	0.0000	0.0000	0.0000	0.0000	0.0000	0.0000	0.0000	0.0000	0.0000	0.0000
OTU_299	O_Cystofilobasidiales	0.0069	0.0094	0.0048	0.0000	0.0056	0.0019	0.0143	0.0022	0.0310	0.0224	0.0121	0.0699	0.0116	0.0330	0.0099	0.0286	0.0033	0.0000	0.0000	0.0015	0.0000	0.0000	0.0000	0.0045	0.0054	0.0078	0.0085	0.0048	0.0000	0.0020	0.0081	0.0133
OTU_300	G_Geomyces	0.1150	0.1415	0.1368	0.1711	0.1034	0.0980	0.0740	0.0701	0.2180	0.1690	0.2014	0.2944	0.1216	0.1623	0.2142	0.1724	0.1516	1.1404	0.2815	0.3782	0.0887	0.0688	0.4200	0.1466	0.1645	0.2114	0.2018	0.1786	0.2091	0.2214	0.2879	0.1934
OTU_301	O_Pleosporales	0.0040	0.0094	0.0097	0.0228	0.0033	0.0086	0.0025	0.0086	0.0010	0.0025	0.0009	0.0094	0.0013	0.0000	0.0000	0.0031	0.0011	0.0030	0.0000	0.0045	0.0015	0.0012	0.0000	0.0030	0.0014	0.0031	0.0017	0.0019	0.0023	0.0030	0.0018	0.0076
OTU_302	P_Ascomycota	0.0416	0.0000	0.1223	0.0215	0.0200	0.0010	0.0093	0.0022	0.0120	0.0012	0.0009	0.0000	0.0013	0.0012	0.0000	0.0071	0.0011	0.0219	0.0013	0.0000	0.0247	0.0147	0.0088	0.0000	0.0381	0.0016	0.0034	0.0048	0.0057	0.0000	0.0000	0.0000
OTU_303	D_Fungi	0.0030	0.0094	0.0291	0.0025	0.0089	0.0105	0.0067	0.0065	0.0050	0.0050	0.0009	0.0013	0.0000	0.0037	0.0000	0.0112	0.0417	0.0030	0.0256	0.0462	0.0145	0.0012	0.0190	0.0209	0.0014	0.0110	0.0051	0.0095	0.0034	0.0000	0.0063	0.0095
OTU_304	D_Fungi	0.0000	0.0000	0.0000	0.0000	0.0022	0.0019	0.0008	0.0043	0.0150	0.0050	0.0000	0.0027	0.0078	0.0037	0.0018	0.0041	0.0077	0.0000	0.0013	0.0015	0.0000	0.0000	0.0029	0.0030	0.0054	0.0016	0.0000	0.0038	0.0023	0.0000	0.0054	0.0019
OTU_305	G_Diversispora	0.0000	0.0150	0.0012	0.0304	0.0856	0.0533	0.0421	0.0022	0.0070	0.0224	0.0056	0.0027	0.0259	0.0110	0.0072	0.0133	0.0011	0.0000	0.0000	0.0000	0.0000	0.0000	0.0000	0.0000	0.0000	0.0000	0.0051	0.0019	0.0023	0.0049	0.0036	0.0190
OTU_306	G_Claroideoglomus	0.0000	0.0009	0.0012	0.0025	0.0711	0.0752	0.0278	0.0582	0.0110	0.0012	0.0037	0.0000	0.0168	0.0012	0.0188	0.0071	0.0088	0.0000	0.0000	0.0000	0.0000	0.0074	0.0000	0.0015	0.0027	0.0000	0.0000	0.0038	0.0000	0.0000	0.0190	0.0000
OTU_307	D_Fungi	0.0099	0.0028	0.0061	0.0000	0.0033	0.0038	0.0025	0.0000	0.0020	0.0050	0.0159	0.0000	0.1242	0.0110	0.0000	0.0000	0.0000	0.0000	0.0000	0.0000	0.0015	0.0025	0.0000	0.0000	0.0000	0.0000	0.0034	0.0000	0.0000	0.0020	0.0000	0.0019
OTU_308	G_Ambispora	0.2330	0.0890	0.1066	0.0900	0.0356	0.0067	0.0084	0.0453	0.0620	0.1454	0.1958	0.1479	0.0116	0.0098	0.0108	0.0306	0.0516	0.0179	0.0781	0.0045	0.0102	0.0111	0.0204	0.0000	0.0367	0.0219	0.0085	0.0458	0.0148	0.0138	0.0081	0.0057
OTU_309	P_Ascomycota	0.0208	0.0131	0.0557	0.0000	0.0356	0.0228	0.0513	0.0313	0.0030	0.0000	0.0000	0.0000	0.0065	0.0000	0.0000	0.0000	0.0758	0.0060	0.0539	0.0000	0.0276	0.0454	0.3369	0.0015	0.0109	0.0125	0.0051	0.0029	0.0000	0.0000	0.0000	0.0000
OTU_310	D_Fungi	0.0634	0.0103	0.0012	0.0114	0.0067	0.0209	0.0160	0.0377	0.0210	0.0124	0.0000	0.0054	0.0065	0.0061	0.0054	0.0102	0.0209	0.0040	0.0108	0.0030	0.0000	0.0049	0.0029	0.0194	0.0054	0.0016	0.0034	0.0076	0.0000	0.0079	0.0009	0.0114
OTU_311	D_Fungi	0.0208	0.0047	0.0000	0.0025	0.0011	0.0038	0.0025	0.0108	0.0220	0.0124	0.0047	0.0081	0.0026	0.0085	0.0027	0.0112	0.0428	0.0139	0.0148	0.0089	0.0044	0.0147	0.0102	0.0150	0.0408	0.0047	0.0051	0.0057	0.0045	0.0079	0.0054	0.0171
OTU_312	D_Fungi	0.0000	0.0000	0.0012	0.0013	0.0144	0.0133	0.0059	0.0420	0.0020	0.0012	0.0000	0.0013	0.0104	0.0134	0.0117	0.0061	0.0000	0.0000	0.0000	0.0015	0.0029	0.0012	0.0029	0.0060	0.0000	0.0000	0.0000	0.0000	0.0080	0.0167	0.0091	0.0095
OTU_313	D_Fungi	0.0139	0.0000	0.0012	0.0000	0.0000	0.0048	0.0017	0.0560	0.0020	0.0075	0.0028	0.0054	0.0104	0.0012	0.0072	0.0051	0.0011	0.0000	0.0000	0.0000	0.0029	0.0012	0.0044	0.0015	0.0000	0.0000	0.0085	0.0000	0.0000	0.0069	0.0091	0.0436
OTU_314	D_Fungi	0.0010	0.0019	0.0133	0.0013	0.0011	0.0133	0.0017	0.0043	0.0010	0.0025	0.0009	0.0013	0.0013	0.0012	0.0009	0.0031	0.0055	0.0388	0.0229	0.0074	0.0087	0.0049	0.0044	0.0120	0.0082	0.0063	0.0017	0.0086	0.0023	0.0000	0.0000	0.0000
OTU_315	G_Diversispora	0.0059	0.0300	0.0036	0.0190	0.0700	0.0333	0.0362	0.0011	0.0230	0.0211	0.0149	0.0027	0.0298	0.0159	0.0054	0.0122	0.0022	0.0000	0.0000	0.0000	0.0000	0.0000	0.0000	0.0000	0.0000	0.0016	0.0017	0.0000	0.0000	0.0197	0.0091	0.0076
OTU_316	F_Tubeufiaceae	0.0000	0.0000	0.0000	0.0000	0.0011	0.0000	0.0000	0.0000	0.0590	0.0075	0.0149	0.0686	0.0091	0.0293	0.0152	0.0214	0.0000	0.0010	0.0013	0.0000	0.0000	0.0000	0.0000	0.0030	0.0041	0.0031	0.0000	0.0010	0.0000	0.0000	0.0000	0.0000
OTU_317	F_Glomeraceae	0.0020	0.0000	0.0036	0.0000	0.0233	0.0010	0.0042	0.0011	0.0800	0.1081	0.0196	0.0484	0.0116	0.0586	0.0332	0.0439	0.0011	0.0000	0.0000	0.0000	0.0000	0.0012	0.0000	0.0000	0.0109	0.0000	0.0000	0.0038	0.0011	0.0069	0.0018	0.0019
OTU_318	D_Fungi	0.0000	0.0019	0.0036	0.0025	0.0122	0.0019	0.0067	0.0011	0.0050	0.0025	0.0009	0.0067	0.0039	0.0024	0.0027	0.0020	0.0110	0.0020	0.0162	0.0119	0.0015	0.0012	0.0058	0.0105	0.0054	0.0078	0.0034	0.0038	0.0034	0.0049	0.0027	0.0019
OTU_319	D_Fungi	0.1477	0.0431	0.2083	0.0722	0.0400	0.0247	0.0177	0.0205	0.1890	0.0137	0.0308	0.0040	0.0155	0.0220	0.0036	0.0031	0.0220	0.0100	0.0067	0.0030	0.1207	0.0000	0.0029	0.0000	0.0285	0.0078	0.0305	0.0286	0.0034	0.0157	0.0688	0.0872
OTU_320	C_Glomeromycetes	0.0000	0.0000	0.0000	0.0000	0.0022	0.0000	0.0118	0.0065	0.0000	0.0075	0.0019	0.0000	0.0000	0.0024	0.0000	0.0082	0.0000	0.0000	0.0000	0.0000	0.0000	0.0025	0.0029	0.0000	0.0014	0.0000	0.0000	0.0000	0.0000	0.0030	0.0027	0.0095
OTU_321	C_Sordariomycetes	0.0000	0.0000	0.0024	0.0038	0.0167	0.0057	0.0050	0.0011	0.0020	0.0075	0.0000	0.0013	0.0000	0.0012	0.0009	0.0020	0.0055	0.0149	0.0148	0.0089	0.0131	0.0049	0.0263	0.0105	0.0000	0.0078	0.0000	0.0191	0.0034	0.0000	0.0000	0.0038
OTU_322	D_Fungi	0.0198	0.0019	0.0000	0.0000	0.0100	0.0190	0.0395	0.0248	0.0680	0.0186	0.0308	0.0148	0.0181	0.1843	0.0439	0.0449	0.4317	0.0050	0.0727	0.0060	0.0189	0.0049	0.0102	0.0837	0.0734	0.0611	0.0373	0.0325	0.0341	0.0403	0.0389	0.1271
OTU_323	G_Claroideoglomus	0.0000	0.0009	0.0000	0.0000	0.0267	0.0200	0.0379	0.0183	0.0150	0.0336	0.0196	0.0054	0.0142	0.0244	0.0206	0.0071	0.0000	0.0000	0.0000	0.0000	0.0058	0.0037	0.0102	0.0120	0.0014	0.0016	0.0017	0.0000	0.0114	0.0030	0.0045	0.0076
OTU_324	D_Fungi	0.0297	0.0094	0.0206	0.0152	0.0167	0.0086	0.0067	0.0129	0.0000	0.0000	0.0019	0.0000	0.0013	0.0012	0.0000	0.0000	0.0000	0.0000	0.0000	0.0000	0.0000	0.0000	0.0000	0.0000	0.0000	0.0000	0.0000	0.0000	0.0000	0.0000	0.0000	0.0000
OTU_325	D_Fungi	0.0000	0.0009	0.0000	0.0000	0.0422	0.0095	0.0042	0.0216	0.0000	0.0000	0.0000	0.0013	0.0039	0.0024	0.0072	0.0020	0.0033	0.0040	0.0013	0.0000	0.0015	0.0012	0.0000	0.0000	0.0041	0.0000	0.0000	0.0019	0.0068	0.0177	0.0045	0.0190
OTU_326	G_Occultifur	0.0367	0.0131	0.0242	0.0494	0.0200	0.0057	0.0135	0.0054	0.0400	0.0733	0.0438	0.0376	0.0168	0.0110	0.0027	0.0082	0.0066	0.0179	0.0350	0.0179	0.0596	0.0025	0.0088	0.0209	0.0367	0.0391	0.0967	0.0439	0.0080	0.0020	0.0054	0.0133
OTU_327	P_Ascomycota	0.1368	0.0515	0.1453	0.0000	0.0700	0.0124	0.0740	0.0636	0.0380	0.0025	0.0000	0.0054	0.0207	0.2673	0.0027	0.1224	0.1648	0.1464	0.0687	0.0968	0.6600	0.1522	0.0058	1.3011	0.0068	0.0110	0.0000	0.1031	0.0023	0.0039	0.0000	0.1043
OTU_328	G_Ophiosphaerella	0.0000	0.0019	0.0000	0.0013	0.0689	0.0000	0.0000	0.0000	0.0540	0.0584	0.0047	0.0013	0.0155	0.0098	0.0009	0.0184	0.0000	0.0000	0.0000	0.0000	0.0000	0.0000	0.0000	0.0000	0.0000	0.0016	0.0000	0.0000	0.0000	0.0000	0.0000	0.0000
OTU_329	F_Herpotrichiellaceae	0.0198	0.0028	0.0012	0.0000	0.0078	0.0181	0.0959	0.0022	0.0000	0.0000	0.0000	0.0000	0.0000	0.0012	0.0018	0.0000	0.0044	0.0000	0.0000	0.0000	0.0029	0.0172	0.0044	0.0000	0.0027	0.0000	0.0000	0.0000	0.0000	0.0010	0.0027	0.0019
OTU_330	G_Glomus	0.0109	0.0000	0.0012	0.0013	0.0111	0.0038	0.0050	0.0032	0.0190	0.0311	0.0131	0.0350	0.0116	0.0305	0.0134	0.0173	0.0000	0.0000	0.0000	0.0000	0.0000	0.0000	0.0000	0.0000	0.0054	0.0016	0.0000	0.0038	0.0045	0.0020	0.0027	0.0019
OTU_331	D_Fungi	0.0506	0.0094	0.0061	0.0038	0.0033	0.0076	0.0143	0.0129	0.0020	0.0000	0.0000	0.0000	0.0013	0.0000	0.0000	0.0000	0.0022	0.0010	0.0108	0.0060	0.0000	0.0000	0.0015	0.0015	0.0000	0.0016	0.0000	0.0000	0.0000	0.0000	0.0000	0.0000
OTU_332	D_Fungi	0.0139	0.0028	0.0097	0.0152	0.0056	0.0086	0.0236	0.0097	0.0000	0.0485	0.0000	0.0000	0.0259	0.0244	0.0009	0.0326	0.0033	0.0010	0.0000	0.0000	0.0087	0.0012	0.0058	0.0015	0.0014	0.0031	0.0000	0.0010	0.0023	0.0059	0.0027	0.0000
OTU_333	P_Ascomycota	0.0079	0.0394	0.0000	0.0000	0.1678	0.0095	0.0059	0.0097	0.0460	0.0671	0.0103	0.0054	0.1449	0.0159	0.2393	0.0071	0.0000	0.0767	0.0013	0.0253	0.0145	0.0332	0.0569	0.0284	0.0285	0.0877	0.0492	0.0286	0.0125	0.0157	0.0308	0.0000
OTU_334	C_Sordariomycetes	0.0139	0.0009	0.0024	0.0025	0.0233	0.0504	1.6988	0.0054	0.0000	0.0000	0.0000	0.0000	0.0556	0.0122	0.0036	0.0061	0.0011	0.0000	0.0000	0.0015	0.0015	0.0012	0.0044	0.0000	0.0122	0.0031	0.0000	0.0000	0.0023	0.0000	0.0000	0.0057
OTU_335	D_Fungi	0.0238	0.0084	0.0012	0.0076	0.0056	0.0247	0.0337	0.0129	0.0020	0.0000	0.0009	0.0229	0.0272	0.0427	0.0081	0.0092	0.0725	0.0120	0.2411	0.5092	0.5408	0.3450	0.1152	0.3335	0.0313	0.0642	0.1475	0.0344	0.0704	0.0669	0.4355	0.3926
OTU_336	D_Fungi	0.0139	0.0075	0.2567	0.0330	0.0033	0.0476	0.0017	0.0011	0.0000	0.0037	0.0019	0.0027	0.0013	0.0000	0.0063	0.0000	0.0033	0.0020	0.0081	0.0015	0.0000	0.0000	0.0029	0.0075	0.0095	0.0063	0.0034	0.0258	0.0205	0.0335	0.0000	0.0000
OTU_337	G_Arthrobotrys	0.0020	0.0009	0.0073	0.0063	0.0000	0.0019	0.0000	0.0000	0.0030	0.0162	0.0047	0.0040	0.0000	0.0037	0.0009	0.0020	0.0000	0.0000	0.0135	0.0164	0.0015	0.0000	0.0073	0.0075	0.0027	0.0016	0.0034	0.0010	0.0000	0.0000	0.0036	0.0000
OTU_338	D_Fungi	0.0149	0.0066	0.0024	0.0013	0.0011	0.0048	0.0008	0.0140	0.0170	0.0087	0.0019	0.0013	0.0026	0.0085	0.0063	0.0031	0.0011	0.0010	0.0000	0.0045	0.0000	0.0012	0.0015	0.0060	0.0027	0.0000	0.0017	0.0010	0.0034	0.0020	0.0036	0.0019
OTU_339	O_Agaricales	0.0010	0.0000	0.0000	0.0038	0.0022	0.0000	0.0008	0.0000	0.3669	0.2088	0.1166	0.4262	0.1863	0.1757	0.1577	0.1458	0.0011	0.0020	0.0000	0.0060	0.0029	0.0025	0.0029	0.0105	0.4499	0.4980	0.9191	0.6838	0.2363	0.6220	0.4564	0.7339
OTU_340	F_Mortierellaceae	0.0010	0.0028	0.0024	0.5843	0.0033	0.0010	0.0008	0.0205	0.1140	0.0112	0.0000	0.2689	0.0000	0.0000	0.0000	0.0020	0.0000	0.0000	0.0000	0.0015	0.0305	0.0000	0.0000	0.0000	0.0000	0.0000	0.0017	0.0000	0.0000	0.0000	0.0000	0.0000
OTU_341	C_Chytridiomycetes	0.0258	0.0169	0.0061	0.0063	0.0033	0.0019	0.0008	0.0022	0.0260	0.0137	0.0019	0.0013	0.0039	0.0159	0.0009	0.0010	0.0011	0.0040	0.0000	0.0000	0.0000	0.0000	0.0000	0.0000	0.0068	0.0063	0.0102	0.0086	0.0000	0.0039	0.0172	0.0019
OTU_342	G_Ramularia	0.0000	0.0000	0.0012	0.0051	0.0033	0.0029	0.0000	0.0000	0.0000	0.0000	0.0000	0.0094	0.0000	0.0061	0.0063	0.0020	0.0011	0.0000	0.0000	0.0015	0.0000	0.0000	0.0015	0.0000	0.0000	0.0000	0.0000	0.0000	0.0000	0.0010	0.0000	0.0000
OTU_343	P_Ascomycota	0.2042	0.2661	0.2579	0.1407	0.3179	1.2351	0.1237	0.1703	0.1880	0.1529	0.2835	0.1694	0.1436	0.2221	0.0744	0.0918	0.0890	0.0518	0.0108	0.0491	0.0160	0.4273	0.3267	0.0688	0.0612	0.0658	0.0288	0.0726	0.0375	0.0846	0.1521	0.1612
OTU_344	G_Myrmecridium	0.0000	0.0000	0.0000	0.0000	0.0000	0.0000	0.0000	0.0022	0.0040	0.0025	0.0047	0.0067	0.0091	0.0000	0.6893	0.0255	0.0000	0.0000	0.0000	0.0000	0.0000	0.0000	0.0000	0.0000	0.0000	0.0000	0.0000	0.0000	0.0000	0.0000	0.0009	0.0000
OTU_345	D_Fungi	0.0000	0.0037	0.0000	0.0038	0.0011	0.0000	0.0000	0.0000	0.0010	0.0037	0.0037	0.0027	0.0052	0.0061	0.0018	0.0020	0.0220	0.0040	0.0000	0.0015	0.0029	0.0037	0.0015	0.0060	0.0163	0.0188	0.0051	0.0086	0.0239	0.0177	0.0100	0.0076
OTU_346	C_Leotiomycetes	0.0000	0.0028	0.0000	0.0013	0.0000	0.0000	0.0017	0.0000	0.0020	0.0634	0.0177	0.0054	0.0026	0.0024	0.0117	0.0092	0.0000	0.0000	0.0000	0.0000	0.0000	0.0000	0.0000	0.0000	0.0000	0.0000	0.0000	0.0000	0.0000	0.0000	0.0000	0.0000
OTU_347	C_Microbotryomycetes	0.0030	0.0028	0.0521	0.0051	0.0011	0.0000	0.0059	0.0022	0.0040	0.0000	0.0019	0.0013	0.0000	0.0000	0.0045	0.0010	0.0000	0.0020	0.0013	0.0030	0.0000	0.0000	0.0000	0.0000	0.0000	0.0000	0.0017	0.0000	0.0000	0.0010	0.0000	0.0000
OTU_348	C_Microbotryomycetes	0.0079	0.0000	0.0000	0.0101	0.0011	0.0000	0.0084	0.0711	0.0040	0.0062	0.0065	0.0255	0.0104	0.0037	0.0009	0.0204	0.0231	0.0199	0.0808	0.2248	0.0291	0.0196	0.0219	0.0957	0.0000	0.0047	0.0000	0.0229	0.0011	0.0000	0.0018	0.0019
OTU_349	G_Peziza	0.0010	0.0009	0.0000	0.0013	0.0078	0.0048	0.0008	0.0032	0.0000	0.0012	0.0187	0.0511	0.0181	0.0024	0.0018	0.0010	0.0000	0.0000	0.0000	0.0000	0.0000	0.0000	0.0000	0.0000	0.0000	0.0000	0.0000	0.0000	0.0000	0.0000	0.0000	0.0000
OTU_350	G_Mastigobasidium	0.0000	0.0000	0.0012	0.0013	0.0000	0.0000	0.0025	0.0043	0.0030	0.0037	0.0037	0.0054	0.0026	0.0073	0.0009	0.0051	0.0000	0.0030	0.0000	0.0045	0.0044	0.0000	0.0015	0.0120	0.0027	0.0047	0.0068	0.0000	0.0000	0.0108	0.0027	0.0000
OTU_351	G_Rhizophagus	0.0010	0.0019	0.0000	0.0000	0.0078	0.0057	0.1127	0.0022	0.0000	0.0050	0.0149	0.0054	0.0116	0.0024	0.0036	0.0082	0.0000	0.0000	0.0000	0.0000	0.0000	0.0000	0.0000	0.0000	0.0000	0.0000	0.0000	0.0000	0.0000	0.0049	0.0000	0.0000
OTU_352	G_Dioszegia	0.0010	0.0000	0.0000	0.0000	0.0022	0.0029	0.0042	0.0000	0.0000	0.0000	0.0019	0.0000	0.0104	0.0037	0.0063	0.0000	0.0011	0.0040	0.0013	0.0045	0.0116	0.0098	0.0335	0.0299	0.0027	0.0063	0.0034	0.0010	0.0080	0.0108	0.0045	0.0000
OTU_353	D_Fungi	0.0119	0.0047	0.0024	0.0000	0.0033	0.0000	0.0034	0.0000	0.0000	0.0062	0.0000	0.0000	0.0052	0.0024	0.0000	0.0000	0.0000	0.0000	0.0013	0.0000	0.0000	0.0000	0.0000	0.0030	0.0000	0.0000	0.0000	0.0000	0.0102	0.0000	0.0000	0.0000
OTU_354	D_Fungi	0.0059	0.2418	0.0036	0.0063	0.0156	0.0057	0.0252	0.0011	0.0040	0.0000	0.0000	0.0000	0.0000	0.0073	0.0018	0.0010	0.0000	0.0110	0.0000	0.0000	0.0015	0.0037	0.0102	0.0000	0.0000	0.0000	0.0000	0.0000	0.0045	0.0207	0.0027	0.0038
OTU_355	D_Fungi	0.0278	0.0066	0.0012	0.0051	0.0078	0.0114	0.0076	0.0075	0.0510	0.0137	0.0037	0.0108	0.0039	0.0061	0.0108	0.0388	0.0527	0.0090	0.0094	0.0194	0.0058	0.0061	0.0306	0.0389	0.0299	0.0078	0.0068	0.0124	0.0148	0.0266	0.0308	0.0493
OTU_356	G_Diversispora	0.0149	0.0244	0.0000	0.0317	0.1745	0.0790	0.0480	0.0075	0.0200	0.0261	0.0093	0.0013	0.0375	0.0098	0.0081	0.0102	0.0000	0.0000	0.0000	0.0000	0.0000	0.0000	0.0029	0.0000	0.0027	0.0000	0.0153	0.0048	0.0011	0.0138	0.0091	0.0247
OTU_357	D_Fungi	0.0000	0.0000	0.0036	0.0013	0.0044	0.0000	0.0050	0.0043	0.0000	0.0000	0.0000	0.0000	0.0013	0.0024	0.0018	0.0020	0.0000	0.0000	0.0040	0.0000	0.0015	0.0000	0.0015	0.0000	0.0027	0.0000	0.0000	0.0000	0.0000	0.0020	0.0000	0.0000
OTU_358	D_Fungi	0.0000	0.0000	0.0000	0.0000	0.0022	0.0029	0.0067	0.0043	0.0000	0.0000	0.0000	0.0000	0.0207	0.0024	0.0018	0.0000	0.0000	0.0000	0.0000	0.0000	0.0494	0.0135	0.0058	0.0015	0.0000	0.0016	0.0034	0.0000	0.0193	0.0020	0.0072	0.0038
OTU_359	G_Articulospora	0.0714	0.1106	0.0424	0.0583	0.0000	0.0038	0.0059	0.0172	0.1710	0.0199	0.0298	0.0336	0.0104	0.1379	0.0117	0.0082	0.0033	0.0100	0.0054	0.0000	0.0000	0.0025	0.0000	0.0120	0.0557	0.0219	0.0136	0.0048	0.0330	0.0039	0.0009	0.0076
OTU_360	D_Fungi	0.0079	0.0037	0.0000	0.0025	0.0011	0.0038	0.0025	0.0108	0.0040	0.0025	0.0000	0.0013	0.0000	0.0000	0.0000	0.0041	0.0099	0.0000	0.0027	0.0015	0.0000	0.0025	0.0058	0.0015	0.0014	0.0000	0.0034	0.0010	0.0000	0.0010	0.0018	0.0019
OTU_361	G_Candida	0.4114	0.4104	0.3403	0.0659	0.1211	0.3150	0.1085	0.0259	0.0820	0.2075	0.1287	0.1734	0.8527	2.5787	0.4804	0.1356	0.0066	0.0040	0.0135	0.0119	0.0029	0.0037	0.0044	0.0045	0.0122	0.0125	0.0271	0.0315	0.0193	0.1378	0.0045	0.0114
OTU_362	G_Sphaerodes	0.0030	0.0066	0.0048	0.0013	0.0022	0.0019	0.0034	0.0032	0.0020	0.0037	0.0000	0.0054	0.0026	0.0012	0.0027	0.0031	0.0011	0.0010	0.0027	0.0015	0.0116	0.0012	0.0044	0.0015	0.0027	0.0031	0.0017	0.0115	0.0023	0.0039	0.0018	0.0057
OTU_363	D_Fungi	0.0059	0.0019	0.0024	0.0013	0.0022	0.0057	0.0025	0.0032	0.0050	0.0025	0.0019	0.0000	0.0000	0.0012	0.0027	0.0061	0.0077	0.0020	0.0013	0.0030	0.0000	0.0000	0.0015	0.0000	0.0014	0.0031	0.0017	0.0010	0.0011	0.0020	0.0045	0.0057
OTU_364	C_Agaricomycetes	0.0297	0.0459	0.1041	0.0000	0.0467	0.0000	0.0210	0.0000	0.0000	0.0000	0.1138	0.0000	0.0052	0.0012	0.0538	0.0071	0.0000	0.0000	0.0000	0.0000	0.0000	0.0000	0.0000	0.0000	0.0000	0.0000	0.0000	0.0000	0.0000	0.0000	0.0000	0.0000
OTU_365	D_Fungi	0.0020	0.0037	0.0036	0.0013	0.0022	0.0000	0.0050	0.0000	0.0020	0.0050	0.0000	0.0040	0.0000	0.0000	0.0000	0.0000	0.0110	0.0020	0.0027	0.0060	0.0000	0.0000	0.0000	0.0015	0.0000	0.0000	0.0000	0.0000	0.0000	0.0000	0.0000	0.0019
OTU_366	D_Fungi	0.0664	0.0028	0.0024	0.0013	0.0000	0.0038	0.0017	0.0108	0.0030	0.0012	0.0000	0.0000	0.0000	0.0024	0.0018	0.0031	0.0143	0.0020	0.0040	0.0015	0.0044	0.0049	0.0015	0.0075	0.0150	0.0078	0.0034	0.0057	0.0011	0.0030	0.0009	0.0095
OTU_367	D_Fungi	0.0208	0.0019	0.0000	0.0000	0.0000	0.0010	0.0034	0.0054	0.0110	0.0050	0.0019	0.0013	0.0000	0.0012	0.0018	0.0143	0.0000	0.0000	0.0000	0.0000	0.0015	0.0000	0.0029	0.0000	0.0027	0.0000	0.0000	0.0000	0.0000	0.0049	0.0009	0.0000
OTU_368	F_Piptocephalidaceae	0.0059	0.0047	0.0024	0.0013	0.0067	0.0019	0.0008	0.0043	0.0210	0.0025	0.0019	0.0108	0.0026	0.0012	0.0027	0.0061	0.0000	0.0000	0.0000	0.0000	0.0015	0.0000	0.0000	0.0000	0.0000	0.0016	0.0000	0.0000	0.0000	0.0000	0.0000	0.0019
OTU_369	G_Geomyces	0.1130	0.1265	0.1853	0.1356	0.1178	0.1009	0.1094	0.1196	0.1220	0.0857	0.0905	0.1022	0.1669	0.0854	0.1058	0.1275	0.2395	0.4173	0.2774	0.3454	0.2195	0.1154	0.1983	0.1869	0.1617	0.2239	0.2289	0.2244	0.1738	0.2588	0.1974	0.1972
OTU_370	C_Sordariomycetes	0.0050	0.0019	0.0000	0.0000	0.0056	0.0010	0.0008	0.0000	0.0030	0.0012	0.0000	0.0054	0.0052	0.0000	0.0018	0.0061	0.0011	0.0050	0.0000	0.0089	0.0015	0.0025	0.0015	0.0105	0.0000	0.0031	0.0000	0.0010	0.0000	0.0000	0.0054	0.0038
OTU_371	P_Ascomycota	0.0000	0.0019	0.0036	0.0000	0.0044	0.0010	0.0008	0.0000	0.0050	0.0050	0.0056	0.0000	0.0000	0.0000	0.0134	0.0000	0.0000	0.0000	0.0000	0.0000	0.0000	0.0000	0.0000	0.0000	0.0313	0.0438	0.0051	0.0067	0.0398	0.2992	0.0036	0.0019
OTU_372	D_Fungi	0.0000	0.0028	0.0024	0.0000	0.0044	0.0990	0.0496	0.0108	0.0000	0.0000	0.0000	0.0000	0.0000	0.0000	0.0000	0.0000	0.0000	0.0000	0.0000	0.0000	0.0000	0.0000	0.0000	0.0000	0.0000	0.0000	0.0000	0.0000	0.0000	0.0000	0.0000	0.0000
OTU_373	G_Setomelanomma	0.0020	0.0000	0.0097	0.0000	0.0000	0.0000	0.0076	0.0000	0.0000	0.0000	0.0009	0.0000	0.0013	0.0012	0.0018	0.0010	0.0055	0.0030	0.0094	0.0238	0.0102	0.0000	0.0233	0.0045	0.0041	0.0031	0.0136	0.0162	0.0068	0.0118	0.0054	0.0152
OTU_374	D_Fungi	0.0000	0.0000	0.0024	0.0000	0.0078	0.0038	0.0135	0.0054	0.0000	0.0000	0.0000	0.0000	0.0000	0.0012	0.0009	0.0000	0.0066	0.0000	0.0000	0.0000	0.0044	0.0111	0.0073	0.0000	0.0014	0.0000	0.0017	0.0000	0.0045	0.0000	0.0027	0.0019
OTU_375	O_Sordariales	0.0347	0.1949	0.0036	0.0051	0.7113	0.1094	0.0446	0.2242	0.0010	0.0000	0.0000	0.0000	0.0013	0.0037	0.0000	0.0000	0.0000	0.0000	0.0000	0.0000	0.0044	0.0000	0.0000	0.0000	0.0027	0.0031	0.0034	0.0535	0.0000	0.0049	0.0027	0.0000
OTU_376	C_Agaricomycetes	0.0089	0.0047	0.0012	0.0000	0.0000	0.0000	0.0008	0.0000	0.0020	0.0037	0.0009	0.0067	0.0026	0.0293	0.0134	0.0000	0.0033	0.0000	0.0000	0.0000	0.0000	0.0000	0.0000	0.0000	0.0014	0.0031	0.0000	0.0010	0.0068	0.0000	0.0081	1.0127
OTU_377	G_Articulospora	0.1864	0.5219	0.0085	0.0418	0.0011	0.0019	0.0042	0.4440	0.0440	0.0373	0.0214	0.0592	0.0155	0.0439	0.0565	0.0561	3.7028	0.0558	0.0619	0.0223	0.0015	0.0025	0.0000	0.5369	0.0231	0.0298	0.0424	0.0201	0.2148	0.0069	0.0027	0.0171
OTU_378	D_Fungi	0.0020	0.0000	0.0024	0.0000	0.2212	0.1846	0.3273	0.1347	0.0020	0.0000	0.0000	0.0013	0.0349	0.0391	0.0206	0.0010	0.0000	0.0000	0.0000	0.0000	0.0015	0.0000	0.0044	0.0000	0.0000	0.0000	0.0000	0.0000	0.0148	0.0118	0.0000	0.0152
OTU_379	F_Pyronemataceae	0.0010	0.0037	0.0000	0.0051	0.0022	0.0086	0.0067	0.0108	0.0000	0.0087	0.0000	0.0027	0.0065	0.0061	0.0063	0.0000	0.0000	0.0129	0.0013	0.0045	0.0131	0.0000	0.0000	0.0060	0.0014	0.0016	0.0153	0.0048	0.0080	0.0039	0.0045	0.0114
OTU_380	D_Fungi	0.3380	0.2511	0.1296	0.2218	0.0367	0.0038	0.0059	0.0032	0.0010	0.0000	0.0000	0.0027	0.0000	0.0000	0.0000	0.0000	0.0297	0.0020	0.0094	0.2859	0.0000	0.0000	0.0000	0.0972	0.0000	0.0016	0.0017	0.0000	0.0011	0.0000	0.0018	0.0000
OTU_381	D_Fungi	0.0258	0.0403	0.0254	0.0051	0.0056	0.0000	0.0008	0.0000	0.0020	0.0037	0.0009	0.0000	0.0000	0.0000	0.0000	0.0010	0.0000	0.0000	0.0000	0.0000	0.0000	0.0000	0.0000	0.0000	0.0027	0.0000	0.0017	0.0019	0.0011	0.0000	0.0009	0.0000
OTU_382	P_Ascomycota	0.0000	0.0047	0.0170	0.0013	0.0044	0.0048	0.0084	0.0000	0.0000	0.0000	0.0019	0.0000	0.0000	0.0000	0.0000	0.0000	0.0033	0.0050	0.0000	0.0000	0.0102	0.0086	0.0000	0.0000	0.0027	0.0047	0.0017	0.0029	0.0000	0.0030	0.0018	0.0000
OTU_383	P_Basidiomycota	0.0139	0.1003	0.0460	0.0520	0.0233	0.0038	0.0050	0.0000	0.0910	0.0634	0.0998	0.0766	0.0311	0.0110	0.0090	0.0235	0.0308	0.0378	0.4309	0.4065	0.0276	0.0061	0.1910	0.1780	0.0476	0.0298	0.0780	0.1270	0.0341	0.0266	0.0389	0.0702
OTU_384	G_Periconia	0.0010	0.0019	0.0000	0.0013	0.0000	0.0000	0.0000	0.0022	0.2449	0.0286	0.0233	0.2971	0.0336	0.0220	0.0179	0.0122	0.0011	0.0000	0.0000	0.0000	0.0000	0.0000	0.0000	0.0000	0.0014	0.0000	0.0000	0.0029	0.0023	0.0000	0.0000	0.0019
OTU_385	D_Fungi	0.0287	0.0047	0.0000	0.0013	0.0078	0.0124	0.0076	0.0302	0.0070	0.0025	0.0009	0.0000	0.0065	0.0024	0.0009	0.0010	0.0406	0.0010	0.0323	0.0015	0.0102	0.0098	0.0058	0.0060	0.0122	0.0141	0.0017	0.0019	0.0034	0.0059	0.0054	0.0190
OTU_386	F_Nectriaceae	0.0050	0.1003	0.0375	0.1077	0.0033	0.0190	0.1287	0.0075	0.0450	0.0547	0.0224	0.0901	0.0155	0.0171	0.0466	0.0082	0.0055	0.0080	0.0202	0.0134	0.0116	0.0025	0.0029	0.0105	0.0163	0.0125	0.0068	0.0057	0.0170	0.0049	0.0000	0.0000
OTU_387	D_Fungi	0.0089	0.0028	0.0085	0.0063	0.0367	0.1028	0.0177	0.0463	0.0010	0.0634	0.0000	0.0013	0.0039	0.0610	0.0009	0.0031	0.0022	0.0000	0.0000	0.0000	0.0029	0.0000	0.0029	0.0000	0.0054	0.0016	0.0000	0.0334	0.0000	0.0030	0.0063	0.0000
OTU_388	D_Fungi	0.0000	0.0009	0.0000	0.0000	0.0178	0.0029	0.0050	0.0453	0.0000	0.0000	0.0000	0.0000	0.0000	0.0000	0.0027	0.0000	0.0000	0.0000	0.0000	0.0000	0.0000	0.0049	0.0102	0.0000	0.0000	0.0000	0.0000	0.0000	0.0000	0.0000	0.0009	0.0000
OTU_389	G_Chaetomium	0.0000	0.0000	0.0000	0.0101	0.0000	0.0000	0.0008	0.0000	0.0170	0.0000	0.0037	0.0202	0.0013	0.0000	0.0018	0.0071	0.0044	0.0050	0.1131	0.0759	0.0204	0.0430	0.0715	0.0075	0.0068	0.0063	0.0136	0.0105	0.0080	0.0000	0.0027	0.0000
OTU_390	O_Glomerales	0.0000	0.0000	0.0000	0.0000	0.0478	0.0114	0.0025	0.0345	0.0000	0.0037	0.0028	0.0027	0.0026	0.0061	0.0117	0.0041	0.0000	0.0000	0.0000	0.0000	0.0015	0.0086	0.0000	0.0000	0.0041	0.0016	0.0017	0.0029	0.0023	0.0128	0.0100	0.0095
OTU_391	G_Gaeumannomyces	0.0000	0.0084	0.0036	0.0228	0.0022	0.0010	0.0000	0.0022	0.1700	0.0286	0.0009	0.1398	0.0026	0.0012	0.0009	0.0082	0.0275	0.0020	0.0700	0.0655	0.0102	0.4555	0.0175	0.0269	0.1196	0.0423	0.0119	0.0124	0.0057	0.0020	0.0045	0.0000
OTU_392	P_Ascomycota	0.0010	0.0000	0.0000	0.0025	0.0000	0.0000	0.0008	0.0000	0.0100	0.0000	0.0019	0.0054	0.0026	0.0024	0.0027	0.0041	0.0011	0.0000	0.0000	0.0000	0.0000	0.0000	0.0000	0.0000	0.0000	0.0000	0.0000	0.0000	0.0000	0.0000	0.0000	0.0000
OTU_393	G_Neosetophoma	0.0030	0.0056	0.0036	0.0139	0.0033	0.0010	0.0067	0.0119	0.0400	0.0845	0.0336	0.1062	0.0569	0.0354	0.1703	0.2060	0.0055	0.0020	0.0027	0.0015	0.0116	0.0012	0.0029	0.0090	0.0041	0.0047	0.0051	0.0057	0.0114	0.0089	0.0054	0.0702
OTU_394	P_Ascomycota	0.0020	0.0028	0.0097	0.0051	0.0044	0.0048	0.0076	0.0000	0.0040	0.0050	0.0028	0.0000	0.0000	0.0024	0.0018	0.0031	0.0033	0.0000	0.0013	0.0015	0.0029	0.0012	0.0000	0.0015	0.0027	0.0016	0.0000	0.0019	0.0080	0.0069	0.0009	0.0038
OTU_395	D_Fungi	0.0020	0.0019	0.0000	0.0000	0.0178	0.0095	0.0118	0.0043	0.0010	0.0025	0.0028	0.0000	0.0000	0.0012	0.0009	0.0010	0.0011	0.0000	0.0000	0.0000	0.0015	0.0049	0.0015	0.0000	0.0027	0.0000	0.0017	0.0000	0.0023	0.0039	0.0009	0.0057
OTU_396	D_Fungi	0.0000	0.0000	0.0012	0.0000	0.0256	0.0190	0.6151	0.0431	0.0760	0.0087	0.0009	0.1492	0.0259	0.2758	0.0027	0.0020	0.0000	0.0000	0.0000	0.0000	0.0247	0.0025	0.0015	0.0000	0.0041	0.0282	0.0000	0.0010	0.0057	0.0157	0.0009	0.0000
OTU_397	D_Fungi	0.0109	0.0047	0.0109	0.0038	0.0022	0.0295	0.0050	0.0065	0.0140	0.0012	0.0028	0.0000	0.0039	0.0110	0.0000	0.0010	0.0253	0.0030	0.0000	0.0000	0.0044	0.0000	0.0029	0.0015	0.0041	0.0110	0.0000	0.0029	0.0170	0.0098	0.0072	0.0303
OTU_398	D_Fungi	0.0139	0.0075	0.0242	0.0063	0.0178	0.0095	0.0135	0.0054	0.0010	0.0037	0.0009	0.0013	0.0104	0.0037	0.0099	0.0000	0.0033	0.0000	0.0067	0.0030	0.0000	0.0123	0.0000	0.0000	0.0000	0.0047	0.0000	0.0019	0.0000	0.0010	0.0027	0.0019
OTU_399	D_Fungi	0.0030	0.0056	0.0036	0.0025	0.0133	0.0010	0.0151	0.0011	0.0050	0.0075	0.0028	0.0013	0.0000	0.0146	0.0000	0.0010	0.0011	0.0000	0.0000	0.0000	0.0000	0.0000	0.0000	0.0000	0.0000	0.0000	0.0000	0.0000	0.0023	0.0000	0.0000	0.0019
OTU_400	D_Fungi	0.0129	0.0028	0.0048	0.0000	0.0022	0.0086	0.0017	0.0032	0.0020	0.0000	0.0000	0.0013	0.0000	0.0000	0.0000	0.0020	0.0121	0.0010	0.0000	0.0015	0.0000	0.0000	0.0015	0.0030	0.0000	0.0016	0.0000	0.0000	0.0000	0.0000	0.0000	0.0038
OTU_401	D_Fungi	0.0248	0.0000	0.0036	0.0558	0.0111	0.0266	0.0000	0.0000	0.0000	0.0012	0.0000	0.0000	0.0000	0.0024	0.0036	0.0000	0.0033	0.0000	0.0000	0.0000	0.0000	0.0000	0.0000	0.0075	0.0014	0.0000	0.0017	0.0000	0.0034	0.0049	0.0000	0.0000
OTU_402	G_Psathyrella	0.0010	0.0506	0.0073	0.0000	0.0000	0.0029	0.0160	0.0032	0.0010	0.0025	0.0028	0.0027	0.0000	0.0024	0.0027	0.0000	0.0121	0.0050	0.0040	0.0268	0.0174	0.0368	0.0598	0.0030	0.0122	0.0047	0.0017	0.0000	0.0500	0.2096	0.1068	0.1005
OTU_403	G_Bullera	0.0010	0.0009	0.0048	0.0051	0.0022	0.0000	0.0042	0.0011	0.0010	0.0025	0.0009	0.0040	0.0013	0.0000	0.0027	0.0020	0.0022	0.0020	0.0013	0.0015	0.0029	0.0025	0.0088	0.0060	0.0014	0.0031	0.0000	0.0000	0.0011	0.0000	0.0018	0.0000
OTU_404	D_Fungi	0.0050	0.0037	0.0012	0.0025	0.0033	0.0000	0.0042	0.0022	0.0010	0.0000	0.0009	0.0134	0.0013	0.0000	0.0000	0.0000	0.0000	0.0000	0.0000	0.0000	0.0044	0.0000	0.0000	0.0045	0.0122	0.0172	0.0153	0.0000	0.0034	0.0079	0.0054	0.0019
OTU_405	D_Fungi	0.0159	0.0009	0.0012	0.0000	0.0000	0.0285	0.0000	0.0000	0.0010	0.0186	0.0009	0.0040	0.0065	0.0488	0.0000	0.0000	0.0011	0.0010	0.0000	0.0015	0.0044	0.0000	0.0029	0.0000	0.0014	0.0000	0.0000	0.0076	0.0114	0.0030	0.0018	0.0247
OTU_406	P_Ascomycota	0.0079	0.0075	0.0012	0.0038	0.0011	0.0010	0.0008	0.0075	0.0050	0.0137	0.0000	0.0027	0.0026	0.0012	0.0018	0.0082	0.0154	0.0050	0.0229	0.0223	0.0116	0.0098	0.0117	0.0239	0.0163	0.0063	0.0034	0.0086	0.0091	0.0187	0.0118	0.0038
OTU_407	C_Chytridiomycetes	0.0000	0.0000	0.0000	0.0000	0.0000	0.0000	0.0000	0.0000	0.0020	0.0025	0.0103	0.0000	0.0052	0.0500	0.0134	0.0000	0.0000	0.0000	0.0000	0.0000	0.0000	0.0037	0.0000	0.0000	0.0041	0.0016	0.0000	0.0000	0.0000	0.0000	0.0000	0.0455
OTU_408	D_Fungi	0.0109	0.0122	0.0061	0.0089	0.0011	0.0000	0.0034	0.0011	0.0040	0.0000	0.0028	0.0121	0.0065	0.0037	0.0081	0.0153	0.0088	0.0020	0.0027	0.0015	0.0029	0.0000	1.0311	0.0224	0.0530	0.0501	0.0322	0.0420	0.0023	0.0138	0.0100	0.0626
OTU_409	D_Fungi	0.0139	0.0037	0.0036	0.0038	0.0233	0.0048	0.0101	0.0075	0.0080	0.0062	0.0093	0.0040	0.0013	0.0037	0.0000	0.0010	0.0209	0.0090	0.0108	0.0045	0.0393	0.0086	0.0321	0.0015	0.0054	0.0078	0.0017	0.0067	0.0023	0.0138	0.0081	0.0152
OTU_410	D_Fungi	0.0188	0.0037	0.0036	0.0051	0.0033	0.0067	0.0050	0.0054	0.0110	0.0062	0.0009	0.0040	0.0013	0.0024	0.0036	0.0112	0.0297	0.0040	0.0054	0.0060	0.0029	0.0025	0.0015	0.0045	0.0122	0.0047	0.0034	0.0010	0.0034	0.0128	0.0018	0.0133
OTU_411	P_Glomeromycota	0.0178	0.0075	0.0182	0.0038	0.0211	0.0095	0.0118	0.0032	0.0070	0.0137	0.0168	0.0013	0.0013	0.0098	0.0009	0.0041	0.0077	0.0000	0.0000	0.0000	0.0000	0.0000	0.0015	0.0000	0.0000	0.0000	0.0000	0.0000	0.0000	0.0000	0.0000	0.0000
OTU_412	D_Fungi	0.0030	0.0000	0.0024	0.0013	0.0011	0.0010	0.0017	0.0022	0.0090	0.0012	0.0000	0.0000	0.0013	0.0037	0.0027	0.0041	0.0066	0.0010	0.0000	0.0015	0.0015	0.0025	0.0015	0.0030	0.0054	0.0016	0.0000	0.0010	0.0034	0.0098	0.0054	0.0057
OTU_413	G_Glomus	0.0000	0.0000	0.0024	0.0000	0.1123	0.0048	0.0286	0.0011	0.0000	0.0000	0.0196	0.0161	0.0116	0.0525	0.0502	0.0000	0.0000	0.0000	0.0027	0.0000	0.0247	0.1621	0.0467	0.0179	0.0027	0.0000	0.0000	0.0010	0.0000	0.0020	0.0018	0.0000
OTU_414	D_Fungi	0.0268	0.0037	0.0000	0.0051	0.0022	0.0057	0.0059	0.0140	0.0280	0.0037	0.0019	0.0000	0.0026	0.0049	0.0027	0.0112	0.0132	0.0050	0.0000	0.0015	0.0029	0.0049	0.0044	0.0015	0.0054	0.0016	0.0017	0.0038	0.0011	0.0059	0.0018	0.0095
OTU_415	G_Funneliformis	0.0000	0.0000	0.0000	0.0000	0.0867	0.0029	0.0168	0.0075	0.0000	0.0012	0.0019	0.0000	0.0052	0.0049	0.0260	0.0000	0.0000	0.0000	0.0000	0.0000	0.0000	0.0049	0.0000	0.0000	0.0109	0.0063	0.0000	0.0334	0.0045	0.0472	0.0063	0.0190
OTU_416	D_Fungi	0.0109	0.0009	0.0012	0.0013	0.0022	0.0010	0.0034	0.0043	0.0100	0.0037	0.0000	0.0013	0.0026	0.0012	0.0009	0.0041	0.0099	0.0020	0.0027	0.0030	0.0000	0.0012	0.0044	0.0045	0.0068	0.0016	0.0017	0.0038	0.0034	0.0030	0.0009	0.0038
OTU_417	P_Basidiomycota	0.0020	0.0169	0.0775	0.0165	0.0056	0.0371	0.0008	0.0097	0.0050	0.0137	0.0000	0.0081	0.0013	0.0000	0.0045	0.0000	0.0505	0.0040	0.0000	0.0000	0.0000	0.0012	0.0029	0.0000	0.0000	0.0110	0.0034	0.0076	0.0011	0.0551	0.0000	0.0000
OTU_418	G_Graphium	0.0030	0.0019	0.0024	0.0114	0.0000	0.0095	0.0008	0.0000	0.0030	0.0025	0.0009	0.0067	0.0000	0.0000	0.0000	0.0020	0.0000	0.0000	0.0000	0.0000	0.0000	0.0000	0.0000	0.0000	0.0054	0.0016	0.0000	0.0010	0.0011	0.0000	0.0000	0.0000
OTU_419	D_Fungi	0.0069	0.0066	0.0218	0.0051	0.0133	0.0124	0.0210	0.0119	0.0110	0.0025	0.0037	0.0000	0.0052	0.0012	0.0045	0.0092	0.0000	0.0000	0.0000	0.0000	0.0087	0.0049	0.0146	0.0000	0.0014	0.0157	0.0000	0.0010	0.0011	0.0049	0.0081	0.0000
OTU_420	G_Schizothecium	0.0020	0.0000	0.0000	0.0000	0.0011	0.0000	0.0000	0.0000	0.0410	0.0447	0.0065	0.0457	0.0388	0.0586	0.0529	0.0367	0.0000	0.0000	0.0000	0.0015	0.0073	0.0098	0.0015	0.0150	0.0231	0.0611	0.0526	0.0965	0.0068	0.0108	0.0081	0.0095
OTU_421	G_Funneliformis	0.0010	0.0000	0.0000	0.0000	0.0811	0.0352	0.1144	0.0517	0.0040	0.0099	0.0037	0.0444	0.0285	0.0110	0.0090	0.0490	0.0154	0.0000	0.0000	0.0000	0.0218	0.0147	0.0802	0.1720	0.0068	0.0438	0.0000	0.0076	0.0261	0.1191	0.0353	0.0171
OTU_422	D_Fungi	0.0000	0.0000	0.0036	0.0013	0.0000	0.0000	0.0000	0.0000	0.0200	0.0037	0.0075	0.0202	0.0168	0.0110	0.0072	0.0092	0.0000	0.0040	0.0040	0.0104	0.0000	0.0037	0.0044	0.0135	0.0000	0.0000	0.0000	0.0010	0.0045	0.0000	0.0000	0.0000
OTU_423	F_Mortierellaceae	0.0020	0.0000	0.0061	0.0051	0.0011	0.0010	0.0025	0.0000	0.0020	0.0000	0.0019	0.0067	0.0000	0.0037	0.0009	0.0020	0.1549	0.0090	0.0000	0.0000	0.0000	0.0012	0.0000	0.0045	0.0095	0.0000	0.0000	0.0000	0.0000	0.0010	0.0000	0.0000
OTU_424	G_Mortierella	0.0010	0.0019	0.0024	0.0203	0.0000	0.0124	0.0017	0.0011	0.0000	0.0000	0.0065	0.0000	0.0000	0.0000	0.0323	0.0000	0.0000	0.0000	0.0000	0.0000	0.0000	0.0012	0.0000	0.0000	0.0000	0.0000	0.0000	0.0000	0.0000	0.0000	0.0000	0.0000
OTU_425	D_Fungi	0.0010	0.0009	0.0012	0.0000	0.0067	0.0048	0.0034	0.0054	0.0000	0.0000	0.0000	0.0027	0.0000	0.0024	0.0000	0.0000	0.0000	0.0000	0.0000	0.0000	0.0073	0.0074	0.0015	0.0030	0.0027	0.0016	0.0017	0.0000	0.0023	0.0020	0.0000	0.0000
OTU_426	C_Sordariomycetes	0.0059	0.0103	0.0012	0.0013	0.0022	0.0038	0.0008	0.0000	0.0060	0.0000	0.0056	0.0027	0.0013	0.0037	0.0054	0.0082	0.0022	0.0020	0.0013	0.0000	0.0015	0.0012	0.0000	0.0060	0.0014	0.0047	0.0017	0.0010	0.0011	0.0000	0.0045	0.0057
OTU_427	C_Sordariomycetes	0.0020	0.0009	0.0012	0.3878	0.0000	0.0010	0.0000	0.0000	0.0000	0.0099	0.0131	0.0175	0.0000	0.0037	0.0125	0.0000	0.0000	0.0000	0.0000	0.0015	0.0015	0.0000	0.0000	0.0000	0.0054	0.0000	0.0017	0.0038	0.0000	0.0000	0.0045	0.0019
OTU_428	F_Glomeraceae	0.0000	0.0000	0.0000	0.0000	0.0033	0.0010	0.0143	0.0086	0.0010	0.0000	0.0000	0.0000	0.0091	0.0085	0.0000	0.0061	0.0000	0.0000	0.0000	0.0000	0.0000	0.0000	0.0015	0.0000	0.0000	0.0000	0.0000	0.0000	0.0000	0.0000	0.0000	0.0000
OTU_429	D_Fungi	0.0010	0.0009	0.0061	0.0025	0.3179	0.3778	0.2995	0.1487	0.0010	0.0012	0.0000	0.0027	0.0078	0.0293	0.0099	0.0020	0.0033	0.0000	0.0000	0.0000	0.0029	0.0012	0.0029	0.0045	0.0000	0.0000	0.0000	0.0038	0.0091	0.0020	0.0036	0.0000
OTU_430	G_Dioszegia	0.0010	0.0056	0.0097	0.0013	0.0000	0.0010	0.0025	0.0032	0.0010	0.0012	0.0037	0.0040	0.0000	0.0024	0.0134	0.0010	0.0055	0.0528	0.0027	0.0000	0.0015	0.0049	0.0102	0.0045	0.0000	0.0016	0.0000	0.0010	0.0114	0.0108	0.0036	0.0057
OTU_431	G_Diversispora	0.0000	0.0000	0.0000	0.0000	0.0044	0.0019	0.0000	0.0043	0.0030	0.0012	0.0065	0.0027	0.0155	0.0012	0.0081	0.0031	0.0000	0.0000	0.0000	0.0000	0.0000	0.0012	0.0000	0.0000	0.0014	0.0031	0.0000	0.0000	0.0000	0.0000	0.0018	0.0038
OTU_432	D_Fungi	0.0030	0.0009	0.0000	0.0076	0.0078	0.0343	0.0732	0.0032	0.0090	0.0497	0.0000	0.0081	0.0078	0.0049	0.0036	0.0061	0.0088	0.0060	0.0323	0.0015	0.0102	0.0049	0.0015	0.0045	0.0109	0.0094	0.0051	0.0048	0.0080	0.0079	0.0063	0.0000
OTU_433	D_Fungi	0.0059	0.0000	0.0000	0.0000	0.0011	0.0038	0.0000	0.0000	0.2030	0.0174	0.0000	0.0013	0.0582	0.0500	0.0609	0.0795	0.0000	0.0000	0.0000	0.0000	0.0058	0.0000	0.0000	0.0000	0.0014	0.0000	0.0000	0.0000	0.0000	0.0000	0.0000	0.0152
OTU_434	D_Fungi	0.0287	0.0037	0.0000	0.0025	0.0022	0.0057	0.0034	0.0097	0.0120	0.0075	0.0037	0.0040	0.0000	0.0073	0.0018	0.0082	0.0132	0.0030	0.0094	0.0074	0.0029	0.0074	0.0073	0.0105	0.0177	0.0078	0.0051	0.0029	0.0034	0.0098	0.0045	0.0057
OTU_435	D_Fungi	0.0020	0.0019	0.0012	0.0000	0.0033	0.0010	0.0017	0.0011	0.0010	0.0012	0.0009	0.0000	0.0000	0.0012	0.0027	0.0061	0.0033	0.0000	0.0013	0.0030	0.0015	0.0000	0.0000	0.0015	0.0027	0.0047	0.0017	0.0000	0.0057	0.0039	0.0027	0.0000
OTU_436	D_Fungi	0.0059	0.0000	0.0000	0.0038	0.0133	0.0010	0.0000	0.0011	0.0220	0.0037	0.0028	0.0054	0.0000	0.0000	0.0081	0.0020	0.0022	0.0129	0.0040	0.0015	0.0145	0.0037	0.0015	0.0045	0.0027	0.0016	0.0000	0.0019	0.0102	0.0020	0.0081	0.0076
OTU_437	G_Gymnostellatospora	0.0010	0.0028	0.0109	0.0139	0.0000	0.0010	0.0017	0.0011	0.0100	0.0000	0.0000	0.0148	0.0026	0.0000	0.0009	0.0041	0.0000	0.0000	0.0027	0.0134	0.0000	0.0000	0.0044	0.0165	0.0082	0.0031	0.0034	0.0038	0.0011	0.0000	0.0009	0.0000
OTU_438	O_Glomerales	0.0000	0.0000	0.0012	0.0000	0.0345	0.0019	0.0000	0.0000	0.0260	0.0012	0.0065	0.0081	0.0246	0.0122	0.0108	0.0469	0.0000	0.0000	0.0000	0.0000	0.0000	0.0061	0.0000	0.0015	0.0000	0.0000	0.0000	0.0000	0.0023	0.0000	0.0000	0.0000
OTU_439	G_Olpidium_brassicae	0.0000	0.0037	0.0000	0.0025	0.0033	0.0038	0.0000	0.0032	0.0010	0.0000	0.0019	0.0000	0.0000	0.0000	0.0009	0.0000	0.0000	0.0000	0.0000	0.0000	0.0000	0.0000	0.0000	0.0000	0.0000	0.0000	0.0000	0.0000	0.0000	0.0000	0.0000	0.0019
OTU_440	G_Glomus	0.1011	0.0197	0.1138	0.0127	0.0367	0.0086	0.0194	0.0011	0.0210	0.0684	0.0429	0.0067	0.0026	0.0146	0.0027	0.0071	0.0121	0.0020	0.0000	0.0015	0.0000	0.0012	0.0044	0.0000	0.0000	0.0000	0.0017	0.0057	0.0011	0.0020	0.0000	0.0019
OTU_441	D_Fungi	0.0099	0.0047	0.0061	0.0051	0.0078	0.0067	0.0076	0.0075	0.0060	0.0075	0.0065	0.0067	0.0026	0.0024	0.0072	0.0061	0.0088	0.0040	0.0108	0.0089	0.0015	0.0061	0.0073	0.0015	0.0082	0.0110	0.0068	0.0095	0.0080	0.0089	0.0091	0.0057
OTU_442	P_Basidiomycota	0.0020	0.0037	0.0024	0.0127	0.0022	0.0067	0.0084	0.0075	0.0080	0.0000	0.0075	0.0134	0.0000	0.0024	0.0018	0.0071	0.0022	0.0080	0.0256	0.0566	0.0015	0.0000	0.0102	0.0359	0.0054	0.0047	0.0017	0.0000	0.0023	0.0020	0.0000	0.0057
OTU_443	D_Fungi	0.0079	0.0009	0.0000	0.0013	0.0033	0.0010	0.0034	0.0097	0.0150	0.0050	0.0019	0.0040	0.0000	0.0085	0.0009	0.0071	0.0165	0.0000	0.0108	0.0134	0.0015	0.0049	0.0073	0.0224	0.0054	0.0016	0.0051	0.0038	0.0000	0.0020	0.0009	0.0057
OTU_444	D_Fungi	0.0169	0.0028	0.0012	0.0013	0.0033	0.0076	0.0067	0.0140	0.0160	0.0062	0.0028	0.0040	0.0000	0.0024	0.0036	0.0153	0.0220	0.0000	0.0040	0.0149	0.0000	0.0012	0.0044	0.0224	0.0027	0.0016	0.0017	0.0029	0.0011	0.0030	0.0027	0.0057
OTU_445	D_Fungi	0.0020	0.0141	0.0024	0.0013	0.5113	0.1570	0.1363	0.3902	0.1090	0.0385	0.2760	0.0027	0.0932	0.0464	0.0170	0.0133	0.3021	0.0040	0.0404	0.0253	0.0814	0.0233	0.2654	0.0150	0.0190	0.0031	0.0068	0.0010	0.0011	0.0276	0.0000	0.0512
OTU_446	G_Glomus	0.0030	0.0084	0.0024	0.0114	1.0314	0.3464	2.3753	1.0681	0.3669	0.3480	1.2430	0.1546	0.7945	0.6700	0.3800	0.5711	0.0022	0.0279	0.0040	0.0521	0.0494	0.2382	0.0292	0.0897	0.0856	0.0423	0.1034	0.0869	0.0523	0.1653	0.1965	0.2124
OTU_447	C_Sordariomycetes	0.1804	0.1883	0.6393	6.5285	0.9303	4.0735	0.7261	0.9075	0.6729	1.8915	0.7329	0.8551	1.7817	0.3686	1.1338	1.5104	1.5488	0.1235	0.6531	1.0601	0.6106	0.2087	1.0034	0.6550	0.0788	0.3774	0.1475	0.2941	0.2807	0.0679	0.1250	0.4950
OTU_448	P_Ascomycota	0.0000	0.0019	0.0000	0.0406	0.0022	0.0057	0.0000	0.0032	0.0000	0.0000	0.0000	0.0108	0.0013	0.0000	0.0000	0.0000	0.0000	0.0000	0.0000	0.0000	0.0000	0.0000	0.0000	0.0808	0.0000	0.0000	0.0000	0.0000	0.0000	0.0000	0.0000	0.0000
OTU_449	C_Sordariomycetes	0.0000	0.0000	0.0000	0.0000	0.0000	0.0000	0.0000	0.0000	0.0020	0.0000	0.0000	0.0000	0.0026	0.0012	0.0036	0.0041	0.0000	0.0000	0.0000	0.0000	0.0015	0.0000	0.0394	0.0030	0.0489	0.4479	0.1119	0.0019	0.1511	0.0305	0.0444	0.2162
OTU_450	G_Conocybe	0.0030	0.0000	0.0000	0.0000	0.0011	0.0124	0.0168	0.0226	0.0070	0.0000	0.0000	0.1506	0.0000	0.0000	0.0000	0.0000	0.0077	0.0000	0.0000	0.0000	0.0000	0.0000	0.0000	0.0000	0.0503	0.0000	0.0085	0.0143	0.0159	0.0010	0.0054	0.0493
OTU_451	D_Fungi	0.0000	0.0047	0.0133	0.0013	0.0011	0.0029	0.0008	0.0000	0.0000	0.0012	0.0000	0.0000	0.0000	0.0012	0.0233	0.0357	0.0000	0.0000	0.0000	0.0000	0.0073	0.0012	0.0102	0.0015	0.0000	0.0047	0.0068	0.0029	0.0023	0.0020	0.0226	0.0019
OTU_452	G_Articulospora	0.0099	0.0000	0.0000	0.0000	0.0000	0.0000	0.0008	0.0000	0.0030	0.0037	0.0065	0.0013	0.0116	0.0037	0.0134	0.0061	0.0000	0.0000	0.0000	0.0000	0.0000	0.0000	0.0000	0.0000	0.0000	0.0000	0.0000	0.0000	0.0000	0.0000	0.0018	0.0000
OTU_453	D_Fungi	0.0020	0.0000	0.0000	0.0000	0.0000	0.0000	0.0008	0.0022	0.0100	0.0025	0.0009	0.0013	0.0026	0.0024	0.0009	0.0020	0.0000	0.0060	0.0000	0.0015	0.0000	0.0000	0.0015	0.0000	0.0299	0.0000	0.0051	0.0067	0.0023	0.0089	0.0045	0.0228
OTU_454	G_Mortierella	0.0000	0.0937	0.0073	0.0101	0.0000	0.0000	0.0000	0.0269	0.0000	0.0000	0.0000	0.0000	0.0000	0.0037	0.0000	0.0000	0.0000	0.0000	0.0027	0.0030	0.0000	0.0000	0.0000	0.0000	0.0000	0.0063	0.0000	0.0086	0.0000	0.0000	0.0000	0.0000
OTU_455	D_Fungi	0.0040	0.0009	0.0024	0.0051	0.0033	0.0010	0.0025	0.0022	0.0030	0.0000	0.0037	0.0027	0.0000	0.0012	0.0018	0.0000	0.0099	0.0050	0.0108	0.0089	0.0029	0.0037	0.0029	0.0135	0.0027	0.0031	0.0000	0.0038	0.0045	0.0030	0.0054	0.0038
OTU_456	O_Tremellales	0.0000	0.0037	0.0000	0.0025	0.0000	0.0000	0.0000	0.0000	0.0450	0.0062	0.0028	0.0000	0.0000	0.0012	0.0000	0.0000	0.0000	0.0010	0.0000	0.0015	0.0000	0.0012	0.0000	0.0000	0.0163	0.0955	0.2730	0.0124	0.0034	0.0000	0.0145	0.0152
OTU_457	D_Fungi	0.0139	0.0000	0.0000	0.0013	0.0000	0.0000	0.0008	0.0075	0.0070	0.0000	0.0000	0.0027	0.0000	0.0012	0.0000	0.0071	0.0033	0.0000	0.0000	0.0000	0.0000	0.0000	0.0000	0.0015	0.0014	0.0000	0.0000	0.0000	0.0000	0.0020	0.0000	0.0095
OTU_458	D_Fungi	0.0030	0.0009	0.0097	0.0089	0.0044	0.0010	0.0017	0.0054	0.0040	0.0000	0.0009	0.0000	0.0013	0.0000	0.0000	0.0031	0.0033	0.0020	0.0027	0.0030	0.0044	0.0025	0.0044	0.0000	0.0000	0.0016	0.0000	0.0029	0.0023	0.0108	0.0027	0.0038
OTU_459	P_Ascomycota	0.0079	0.0084	0.0085	0.0114	0.0022	0.0057	0.0000	0.0032	0.0070	0.0012	0.0009	0.0040	0.0246	0.0342	0.1362	0.0061	0.0099	0.0757	0.0067	0.0387	0.0174	0.0823	0.1065	0.6161	0.0775	0.0454	0.0678	0.0105	0.1579	0.0689	0.1078	0.0550
OTU_460	C_Agaricomycetes	0.0010	0.0028	0.0012	0.0051	0.0011	0.0019	0.0000	0.0011	0.0040	0.0037	0.0047	0.0040	0.0000	0.0037	0.0000	0.0031	0.0154	0.0080	0.0000	0.0000	0.0058	0.0037	0.0015	0.0000	0.0000	0.0031	0.0085	0.0038	0.0023	0.0000	0.0027	0.0000
OTU_461	D_Fungi	0.0099	0.0037	0.0061	0.0000	0.0000	0.0038	0.0050	0.0011	0.0010	0.0000	0.0009	0.0874	0.0052	0.0037	0.0054	0.0010	0.0044	0.0000	0.0067	0.0074	0.0044	0.0000	0.0015	0.0015	0.0000	0.0000	0.0000	0.0000	0.0000	0.0000	0.0000	0.0000
OTU_462	C_Agaricomycetes	0.5700	0.0103	0.0073	0.0000	0.0522	0.0561	0.0395	0.0022	0.0010	0.0037	0.0000	0.0000	0.0000	0.0000	0.0000	0.0000	0.0011	0.0010	0.0027	0.0000	0.0000	0.0000	0.0015	0.0000	0.0014	0.0000	0.0000	0.0000	0.0000	0.0020	0.0000	0.0000
OTU_463	D_Fungi	0.0278	0.0047	0.0012	0.0076	0.0278	0.0295	0.0034	0.0086	0.0000	0.0000	0.0009	0.0000	0.0065	0.0000	0.0000	0.0000	0.0000	0.0000	0.0000	0.0000	0.0000	0.0000	0.0000	0.0000	0.0095	0.0000	0.0000	0.0000	0.0000	0.0000	0.0000	0.0000
OTU_464	O_Helotiales	0.0010	0.0009	0.0012	0.0025	0.0000	0.9582	0.0017	0.0000	1.2317	0.0025	0.0009	0.0000	0.0013	0.0171	0.0054	0.0000	0.0000	0.0000	0.0646	0.0447	0.0058	0.0037	0.0000	0.0030	0.0177	0.0000	0.2052	0.0134	0.0216	0.0000	0.0000	0.0000
OTU_465	G_Stagonospora	0.0010	0.0000	0.0000	0.0013	0.0000	0.0000	0.0000	0.0022	0.0290	0.0174	0.0009	0.0242	0.0129	0.0183	0.0269	0.0163	0.0000	0.0000	0.0000	0.0000	0.0000	0.0000	0.0015	0.0000	0.0000	0.0016	0.0034	0.0000	0.0000	0.0000	0.0000	0.0000
OTU_466	O_Pleosporales	0.0000	0.0000	0.0000	0.0000	0.0000	0.0000	0.0008	0.0000	0.0020	0.0012	0.0103	0.0013	0.0168	0.0146	0.0269	0.0041	0.0000	0.0000	0.0000	0.0000	0.0131	0.0000	0.0190	0.0359	0.0000	0.0016	0.0000	0.0000	0.0023	0.0000	0.0027	0.0000
OTU_467	G_Claroideoglomus	0.0000	0.0000	0.0000	0.0000	0.0044	0.0038	0.0084	0.0000	0.0270	0.0025	0.0000	0.0000	0.0052	0.0000	0.0063	0.0000	0.0000	0.0000	0.0000	0.0000	0.0000	0.0000	0.0000	0.0000	0.0027	0.0000	0.0000	0.0000	0.0080	0.0000	0.0217	0.0019
OTU_468	P_Ascomycota	0.0069	0.0084	0.0024	0.0114	0.0111	0.0038	0.0017	0.0043	0.0030	0.0000	0.0028	0.0282	0.0039	0.0024	0.0018	0.0000	0.0022	0.0000	0.0027	0.0238	0.0058	0.0012	0.0029	0.0374	0.0014	0.0031	0.0034	0.0010	0.0023	0.0098	0.0009	0.0019
OTU_469	P_Ascomycota	0.0030	0.0037	0.0024	0.0000	0.0000	0.0029	0.0008	0.0054	0.0000	0.0012	0.0000	0.0013	0.0000	0.0000	0.0009	0.0000	0.0055	0.0000	0.0027	0.0030	0.0087	0.0012	0.0029	0.0030	0.0000	0.0016	0.0017	0.0000	0.0000	0.0030	0.0009	0.0019
OTU_470	P_Ascomycota	0.0535	0.0094	0.0000	0.0013	0.1556	0.0362	0.0008	0.0097	0.0010	0.0012	0.0009	0.3482	0.0000	0.0000	0.0000	0.0000	0.0000	0.0000	0.0000	0.0000	0.0000	0.0000	0.0000	0.0000	0.0000	0.0000	0.0000	0.0029	0.0000	0.0000	0.0000	0.0000
OTU_471	D_Fungi	0.0000	0.0009	0.0000	0.0000	0.0000	0.0000	0.0000	0.0000	0.0490	0.0137	0.0056	0.0094	0.0000	0.0085	0.0027	0.0082	0.0077	0.0020	0.0013	0.0000	0.0000	0.0000	0.0000	0.0030	0.0122	0.0031	0.0017	0.0000	0.0034	0.0039	0.0018	0.0019
OTU_472	P_Ascomycota	0.0000	0.0000	0.0012	0.0000	0.0845	0.0048	0.0850	0.0000	0.0140	0.0000	0.0000	0.0000	0.0013	0.0000	0.0000	0.0000	0.0000	0.0000	0.0000	0.0000	0.0000	0.0025	0.0102	0.0105	0.0000	0.0016	0.0000	0.0038	0.0000	0.2303	0.0743	0.0057
OTU_473	D_Fungi	0.9635	0.3064	0.1501	0.1445	0.0056	0.0057	0.0000	0.0313	0.0040	0.0000	0.0000	0.0000	0.0013	0.0024	0.0000	0.0000	0.0417	0.0010	0.0000	0.0000	0.0000	0.0000	0.0000	0.0015	0.0245	0.0000	0.0000	0.0000	0.0000	0.0000	0.0000	0.0000
OTU_474	D_Fungi	0.0089	0.0019	0.0000	0.0000	0.0022	0.0086	0.0034	0.0054	0.0020	0.0025	0.0000	0.0013	0.0000	0.0012	0.0009	0.0010	0.0066	0.0020	0.0000	0.0060	0.0015	0.0012	0.0044	0.0000	0.0027	0.0031	0.0017	0.0010	0.0000	0.0030	0.0009	0.0057
OTU_475	C_Sordariomycetes	0.0506	0.0009	0.0000	0.1039	0.7891	1.0248	0.0017	0.0032	0.0010	0.0000	0.0000	0.0000	0.0013	0.0037	0.0000	0.0000	0.0000	0.0000	0.0000	0.0000	0.0015	0.0000	0.0000	0.0000	0.0000	0.0000	0.0000	0.0019	0.0011	0.0000	0.0000	0.0000
OTU_476	D_Fungi	0.0010	0.0000	0.0000	0.0000	0.0011	0.0048	0.0050	0.0054	0.0000	0.0000	0.0000	0.0000	0.0000	0.0037	0.0027	0.0041	0.0044	0.0010	0.0013	0.0000	0.0029	0.0012	0.0088	0.0045	0.0000	0.0000	0.0000	0.0000	0.0000	0.0000	0.0018	0.0038
OTU_477	C_Agaricomycetes	0.0139	0.0000	0.0000	0.0013	0.0111	0.0000	0.1203	0.0043	0.0000	0.0062	0.0000	0.0296	0.0052	0.0146	0.0018	0.0112	0.0011	0.0020	0.0000	0.0000	0.0102	0.2333	0.0088	0.0015	0.0000	0.0000	0.0000	0.0000	0.0011	0.0010	0.0063	0.0019
OTU_478	G_Spizellomyces	0.0000	0.0019	0.0012	0.0114	0.0078	0.0095	0.0168	0.0054	0.0000	0.0025	0.0000	0.0000	0.0000	0.0000	0.0000	0.0000	0.0527	0.0010	0.0054	0.0000	0.0073	0.0037	0.0102	0.0015	0.0000	0.0000	0.0000	0.0000	0.0000	0.0010	0.0000	0.0038
OTU_479	D_Fungi	0.0069	0.0009	0.0012	0.0076	0.0078	0.0209	0.0564	0.0420	0.0000	0.0336	0.0009	0.0000	0.0065	0.0220	0.0018	0.0000	0.0011	0.0020	0.0000	0.0000	0.0029	0.0086	0.0015	0.0000	0.0000	0.0016	0.0017	0.0057	0.0011	0.0010	0.0018	0.0019
OTU_480	D_Fungi	0.0198	0.0337	0.0085	0.0000	0.0089	0.0143	0.0000	0.0032	0.0020	0.0000	0.0009	0.0000	0.0013	0.0000	0.0009	0.0000	0.0044	0.0000	0.0027	0.0000	0.0015	0.0000	0.0000	0.0000	0.0027	0.0016	0.0000	0.0000	0.0068	0.0089	0.0009	0.0019
OTU_481	F_Pezizaceae	0.0307	0.0094	0.0000	0.0000	0.0000	0.0067	0.0017	0.0011	0.0000	0.0000	0.0000	0.0000	0.0039	0.0000	0.0009	0.0000	0.0000	0.0000	0.0000	0.0000	0.0000	0.0000	0.0000	0.0000	0.0000	0.0000	0.0000	0.0000	0.0000	0.0000	0.0000	0.0000
OTU_482	P_Ascomycota	0.0218	0.0009	0.0036	0.0000	0.0200	0.0057	0.0286	0.0043	0.0000	0.0050	0.0019	0.0000	0.0026	0.0024	0.0117	0.0000	0.0000	0.0000	0.0000	0.0000	0.0000	0.0012	0.0000	0.0000	0.0054	0.0000	0.0000	0.0057	0.0000	0.0020	0.0009	0.0000
OTU_483	D_Fungi	0.0010	0.0000	0.0000	0.0000	0.0000	0.0000	0.0000	0.0000	0.2389	0.0112	0.0000	0.0040	0.0039	0.0085	0.0072	0.0051	0.0000	0.0000	0.0000	0.0000	0.0015	0.0000	0.0000	0.0000	0.0027	0.0047	0.0000	0.0000	0.0000	0.0010	0.0000	0.0000
OTU_484	D_Fungi	0.0000	0.0047	0.0012	0.0025	0.0333	0.0038	0.0008	0.0043	0.0000	0.0000	0.0000	0.0000	0.0000	0.0000	0.0000	0.0000	0.0000	0.0110	0.0000	0.0000	0.0029	0.0049	0.0044	0.0000	0.0000	0.0000	0.0000	0.0000	0.0000	0.0246	0.0000	0.0171
OTU_485	D_Fungi	0.0010	0.0019	0.0012	0.0025	0.0011	0.0038	0.0017	0.0000	0.0000	0.0012	0.0000	0.1022	0.0000	0.0000	0.0009	0.0020	0.0000	0.0000	0.0013	0.0015	0.0000	0.0000	0.0000	0.0000	0.0000	0.0000	0.0017	0.0000	0.0000	0.0089	0.0018	0.0019
OTU_486	D_Fungi	0.0535	0.0047	0.0000	0.0013	0.0033	0.0200	0.0042	0.0108	0.0000	0.0000	0.0065	0.0000	0.0013	0.0012	0.0027	0.0439	0.0088	0.0010	0.0000	0.0000	0.0000	0.0061	0.0102	0.0015	0.0014	0.0031	0.0000	0.0038	0.0000	0.0000	0.0000	0.0038
OTU_487	F_Piptocephalidaceae	0.0020	0.0028	0.0036	0.0025	0.0033	0.0019	0.0034	0.0032	0.0040	0.0124	0.0000	0.0027	0.0000	0.0012	0.0000	0.0010	0.0066	0.0000	0.0067	0.0030	0.0029	0.0000	0.0015	0.0000	0.0041	0.0047	0.0034	0.0010	0.0000	0.0030	0.0009	0.0057
OTU_488	P_Basidiomycota	0.0000	0.0000	0.0000	0.0000	0.0000	0.0000	0.0000	0.0000	0.0810	0.0025	0.0000	0.0000	0.0116	0.0061	0.0018	0.0173	0.0000	0.0000	0.0000	0.0000	0.0000	0.0000	0.0000	0.0000	0.0000	0.0000	0.0000	0.0000	0.0000	0.0000	0.0000	0.0000
OTU_489	D_Fungi	0.0000	0.0009	0.0012	0.0000	0.0000	0.0029	0.0000	0.0022	0.0030	0.0037	0.0037	0.0027	0.0013	0.0000	0.0027	0.0000	0.0022	0.0010	0.0040	0.0015	0.0000	0.0012	0.0029	0.0015	0.0027	0.0031	0.0017	0.0038	0.0011	0.0039	0.0036	0.0095
OTU_490	D_Fungi	0.0059	0.0019	0.0024	0.0013	0.0022	0.0029	0.0000	0.0011	0.0000	0.0000	0.0000	0.0000	0.0026	0.0000	0.0000	0.0000	0.0000	0.0000	0.0000	0.0015	0.0015	0.0000	0.0000	0.0000	0.0000	0.0000	0.0017	0.0000	0.0000	0.0000	0.0009	0.0000
OTU_491	O_Helotiales	0.0030	0.0000	0.0145	0.0000	0.0000	0.0019	0.0000	0.0000	0.0000	0.0050	0.0093	0.0000	0.0013	0.0000	0.0000	0.0000	0.0000	0.0010	0.0000	0.0000	0.0000	0.0012	0.0000	0.0000	0.0027	0.0016	0.0017	0.0000	0.0023	0.0000	0.0072	0.0000
OTU_492	G_Periconia	0.0020	0.0000	0.0000	0.0000	0.0000	0.0000	0.0000	0.0011	1.1018	0.0099	0.0065	0.0027	0.0026	0.0085	0.0009	0.0010	0.0000	0.0000	0.0000	0.0000	0.0000	0.0000	0.0000	0.0000	0.0000	0.0000	0.0000	0.0000	0.0000	0.0000	0.0000	0.0000
OTU_493	D_Fungi	0.0010	0.0000	0.0000	0.0000	0.0022	0.0019	0.0025	0.0011	0.0030	0.0012	0.0000	0.0000	0.0013	0.0012	0.0018	0.0000	0.0000	0.0000	0.0000	0.0015	0.0000	0.0012	0.0000	0.0000	0.0000	0.0000	0.0017	0.0010	0.0023	0.0020	0.0018	0.0038
OTU_494	D_Fungi	0.0030	0.0000	0.0000	0.0000	0.0044	0.0000	0.0008	0.0000	0.0070	0.0099	0.0028	0.0027	0.0052	0.0098	0.0045	0.0041	0.0011	0.0000	0.0000	0.0000	0.0000	0.0000	0.0000	0.0000	0.0000	0.0000	0.0000	0.0000	0.0000	0.0000	0.0000	0.0000
OTU_495	F_Pyronemataceae	0.0000	0.0000	0.0000	0.0089	0.0000	0.0010	0.0000	0.0011	0.0000	0.0783	0.0000	0.0040	0.0000	0.0000	0.0000	0.0255	0.0780	0.0010	0.0081	0.0045	0.0000	0.0074	0.0117	0.0000	0.0000	0.0000	0.0000	0.0000	0.0000	0.0650	0.0000	0.0000
OTU_496	D_Fungi	0.0020	0.0028	0.0000	0.0000	0.0033	0.0010	0.0017	0.0011	0.0010	0.0050	0.0009	0.0000	0.0013	0.0049	0.0009	0.0051	0.0011	0.0010	0.0000	0.0000	0.0000	0.0000	0.0000	0.0000	0.0014	0.0000	0.0000	0.0000	0.0000	0.0000	0.0009	0.0000
OTU_497	D_Fungi	0.0000	0.0019	0.0048	0.0025	0.0033	0.0019	0.0008	0.0011	0.0010	0.0012	0.0019	0.0013	0.0000	0.0000	0.0009	0.0010	0.0011	0.0010	0.0000	0.0000	0.0000	0.0012	0.0015	0.0000	0.0014	0.0016	0.0034	0.0019	0.0000	0.0000	0.0036	0.0000
OTU_498	D_Fungi	0.0020	0.0000	0.0024	0.0051	0.0000	0.0000	0.0025	0.0011	0.0030	0.0037	0.0009	0.0000	0.0013	0.0024	0.0045	0.0010	0.0033	0.0010	0.0013	0.0000	0.0029	0.0037	0.0029	0.0015	0.0041	0.0078	0.0034	0.0010	0.0091	0.0010	0.0036	0.0000
OTU_499	G_Peziza	0.1199	0.0019	0.0109	0.0089	0.0600	0.0019	0.0126	0.1832	0.0050	0.0025	0.0401	0.0040	0.0776	2.5458	0.0000	0.0031	0.0000	0.0000	0.0000	0.0060	0.0015	0.0000	0.0000	0.0703	0.0000	0.0000	0.0000	0.0344	0.0000	0.0000	0.0000	0.0019
OTU_500	P_Ascomycota	0.0000	0.0000	0.0024	0.0000	0.0000	0.0000	0.0034	0.0000	0.0010	0.0112	0.0131	0.0000	0.1268	0.0488	0.0045	0.0010	0.0000	0.0000	0.0000	0.0000	0.0000	0.0000	0.0000	0.0000	0.0095	0.0094	0.0237	0.0000	0.0239	0.0039	0.0027	0.0019
OTU_501	P_Basidiomycota	0.0010	0.0019	0.7132	0.0025	0.0000	0.0000	0.0025	0.0000	0.0000	0.1168	0.0000	0.0027	0.0000	0.0940	0.0000	0.0092	0.0681	0.0030	1.8019	0.0015	0.0858	0.2161	0.8167	0.0015	0.0163	0.0188	0.0136	0.0019	0.0000	0.0000	0.0018	0.0000
OTU_502	D_Fungi	0.0020	0.0000	0.0000	0.0000	0.0000	0.0000	0.0000	0.0000	0.0240	0.0000	0.0112	0.0094	0.0181	0.0000	0.0045	0.0143	0.0033	0.0010	0.0000	0.0000	0.0015	0.0025	0.0029	0.0000	0.0041	0.0000	0.0000	0.0019	0.0068	0.0157	0.0281	0.0019
OTU_503	D_Fungi	0.0099	0.0094	0.0012	0.0076	0.0111	0.0114	0.0067	0.0043	0.0010	0.0124	0.0084	0.0013	0.0026	0.0085	0.0000	0.0010	0.0055	0.0030	0.0013	0.0104	0.0087	0.0025	0.0000	0.0060	0.0014	0.0016	0.0000	0.0067	0.0000	0.0020	0.0009	0.0038
OTU_504	C_Dothideomycetes	0.0000	0.0103	0.0012	0.0355	0.0022	0.0000	0.0076	0.0011	0.0430	0.0025	0.1828	0.0054	0.0155	0.0000	0.0036	0.0000	0.0033	0.0219	0.0000	0.0000	0.0029	0.0135	0.0000	0.0000	0.2161	0.1284	0.0017	0.0086	0.0023	0.0000	0.0009	0.0000
OTU_505	G_Dactylella	0.0020	0.0037	0.0000	0.0000	0.0089	0.0019	0.0093	0.0043	0.0010	0.0025	0.0056	0.0013	0.0039	0.0195	0.0108	0.0031	0.0187	0.0040	0.0417	0.0030	0.0247	0.0823	0.6198	0.0179	0.0829	0.0470	0.0085	0.0067	0.1659	0.0305	0.0063	0.0360
OTU_506	D_Fungi	0.0040	0.0019	0.0048	0.0013	0.0022	0.0000	0.0059	0.0011	0.0010	0.0025	0.0000	0.0000	0.0000	0.0000	0.0000	0.0000	0.0033	0.0000	0.0000	0.0000	0.0116	0.0000	0.0015	0.0000	0.0000	0.0000	0.0000	0.0000	0.0000	0.0010	0.0009	0.0019
OTU_507	P_Ascomycota	0.0010	0.0000	0.0012	0.0063	0.0011	0.0010	0.0000	0.0000	0.0050	0.0000	0.0168	0.0040	0.0000	0.0012	0.0036	0.0010	0.0341	0.0060	0.0013	0.0000	0.0044	0.0037	0.0029	0.0000	0.0054	0.0016	0.0034	0.0067	0.0011	0.1397	0.0054	0.0152
OTU_508	P_Ascomycota	0.0010	0.0000	0.0000	0.0076	0.0000	0.0000	0.0000	0.0119	0.0370	0.0012	0.0019	0.0874	0.0000	0.0000	0.0000	0.0224	0.0011	0.0010	0.0162	0.0223	0.0015	0.0000	0.0102	0.0120	0.0000	0.0000	0.0017	0.0000	0.0000	0.0000	0.0000	0.0019
OTU_509	G_Preussia	0.0020	0.0000	0.0012	0.0025	0.0033	0.0000	0.0008	0.0065	0.0000	0.0000	0.0009	0.0000	0.0000	0.0024	0.0000	0.0000	0.0066	0.0060	0.0013	0.0104	0.1018	0.0172	0.0452	0.2542	0.0014	0.0031	0.0000	0.0038	0.0250	0.0118	0.0109	0.0038
OTU_510	G_Leptosphaeria	0.0030	0.0009	0.0012	0.0000	0.0000	0.0000	0.0000	0.0000	0.0000	0.0000	0.0000	0.0000	0.0000	0.0000	0.0000	0.0010	0.0253	0.0000	0.0000	0.0030	0.0058	0.0025	0.0146	0.0045	0.0014	0.0078	0.0203	0.0076	0.0034	0.0138	0.0072	0.0076
OTU_511	D_Fungi	0.0000	0.0000	0.0000	0.0000	0.0011	0.0000	0.0000	0.0000	0.0230	0.0012	0.0009	0.0054	0.0013	0.0000	0.0000	0.0010	0.0626	0.0040	0.0108	0.0179	0.0145	0.0086	0.0073	0.0224	0.0680	0.0078	0.0187	0.0105	0.0284	0.0059	0.0018	0.0019
OTU_512	G_Gymnoascus	0.0020	0.0019	0.0000	0.0355	0.0000	0.0010	0.0017	0.0011	0.0010	0.0000	0.0000	0.0081	0.0026	0.0012	0.0000	0.0020	0.0000	0.0000	0.0027	0.0045	0.0000	0.0000	0.0015	0.0045	0.0027	0.0047	0.0000	0.0010	0.0034	0.0069	0.0018	0.0000
OTU_513	P_Ascomycota	0.0099	0.0009	0.0024	0.0000	0.0011	0.0010	0.0017	0.0011	0.0020	0.0050	0.0000	0.0215	0.0065	0.0012	0.0009	0.0020	0.0450	0.0030	0.0202	0.0104	0.0116	0.0061	0.0029	0.0045	0.0054	0.0000	0.0000	0.0000	0.0068	0.0000	0.0000	0.0019
OTU_514	D_Fungi	0.0079	0.0028	0.0000	0.0025	0.0022	0.0000	0.0034	0.0043	0.0040	0.0037	0.0009	0.0027	0.0039	0.0024	0.0018	0.0010	0.0121	0.0010	0.0013	0.0015	0.0073	0.0025	0.0044	0.0075	0.0041	0.0016	0.0017	0.0019	0.0000	0.0010	0.0036	0.0019
OTU_515	D_Fungi	0.0030	0.0009	0.0000	0.0000	0.0000	0.0000	0.0000	0.0043	0.0090	0.0000	0.0000	0.0000	0.0000	0.0000	0.0009	0.0051	0.0033	0.0010	0.0040	0.0015	0.0015	0.0025	0.0015	0.0030	0.0027	0.0031	0.0000	0.0000	0.0011	0.0020	0.0000	0.0038
OTU_516	D_Fungi	0.0030	0.0000	0.0000	0.0025	0.0011	0.0010	0.0017	0.0054	0.0040	0.0050	0.0009	0.0013	0.0013	0.0024	0.0018	0.0051	0.0011	0.0000	0.0000	0.0000	0.0000	0.0000	0.0000	0.0045	0.0014	0.0047	0.0000	0.0010	0.0011	0.0010	0.0000	0.0038
OTU_517	D_Fungi	0.0397	0.0159	0.1489	0.0152	0.1034	0.1456	0.1127	0.0302	0.0010	0.0000	0.0028	0.0000	0.0026	0.0122	0.0018	0.0041	0.0011	0.0000	0.0000	0.0000	0.0000	0.0074	0.0029	0.0000	0.0027	0.0000	0.0000	0.0000	0.0045	0.0020	0.0027	0.0076
OTU_518	G_Diversispora	0.0030	0.0009	0.0000	0.0025	0.0033	0.0048	0.0067	0.0000	0.0010	0.0050	0.0009	0.0000	0.0104	0.0073	0.0036	0.0010	0.0011	0.0000	0.0000	0.0000	0.0029	0.0000	0.0000	0.0000	0.0000	0.0000	0.0051	0.0000	0.0034	0.0010	0.0027	0.0000
OTU_519	P_Ascomycota	0.0000	0.0000	0.0000	0.0000	0.0100	0.0000	0.0000	0.0000	0.0000	0.0000	0.0000	0.0000	0.0052	0.0195	0.0090	0.0000	0.0000	0.0000	0.0000	0.0000	0.0000	0.0196	0.0029	0.0060	0.0000	0.0000	0.0000	0.0000	0.2920	0.1673	0.0163	0.0436
OTU_520	G_Glomus	0.0000	0.0000	0.0000	0.0000	0.0022	0.0000	0.0000	0.0000	0.0000	0.0062	0.0196	0.0000	0.0026	0.0122	0.0018	0.0255	0.0000	0.0000	0.0000	0.0000	0.0000	0.0000	0.0000	0.0000	0.0014	0.0000	0.0000	0.0000	0.0000	0.0000	0.0000	0.0000
OTU_521	D_Fungi	0.0000	0.0000	0.0000	0.0000	0.1323	0.0038	0.0000	0.0000	0.0040	0.0062	0.0000	0.0000	0.0776	0.0037	0.0206	0.0071	0.0000	0.0000	0.0000	0.0000	0.0000	0.0000	0.0000	0.0000	0.0000	0.0000	0.0000	0.0000	0.0034	0.0010	0.0000	0.0000
OTU_522	G_Coniothyrium	0.0000	0.0009	0.0000	0.0000	0.0767	0.0010	0.0017	0.0000	0.0040	0.0012	0.0009	0.0000	0.0000	0.0037	0.0063	0.0000	0.0033	0.0000	0.0000	0.0015	0.0029	0.0061	0.0088	0.0060	0.0109	0.0031	0.0000	0.0019	0.0114	0.0039	0.0127	0.0095
OTU_523	G_Phlebiella	0.0000	0.0000	0.0000	0.0000	0.0000	0.0000	0.0000	0.0000	0.0000	0.0000	0.0000	0.0403	0.5396	0.1013	0.0242	0.0367	0.0000	0.0000	0.0000	0.0000	0.0000	0.0000	0.0000	0.0000	0.0000	0.0000	0.0000	0.0000	0.0000	0.0000	0.0000	0.0000
OTU_524	F_Trichocomaceae	0.0000	0.0009	0.0000	0.0000	0.0000	0.0000	0.0168	0.0000	0.0000	0.0012	0.0000	0.0000	0.0000	0.0024	0.0000	0.0020	0.0000	0.0020	0.0013	0.0015	0.0029	0.0025	0.0015	0.0000	0.0000	0.0000	0.0000	0.0000	0.0000	0.0000	0.0000	0.0000
OTU_525	G_Funneliformis	0.0000	0.0019	0.0000	0.0000	0.0122	0.0086	0.0126	0.0000	0.0010	0.0000	0.0000	0.0000	0.0000	0.0159	0.0000	0.0020	0.0000	0.0000	0.0000	0.0000	0.0000	0.0000	0.0015	0.0000	0.0014	0.0000	0.0000	0.0000	0.0114	0.0010	0.0000	0.0019
OTU_526	G_Glomus	0.0000	0.0009	0.0000	0.0000	0.0044	0.0000	0.0008	0.0000	0.0010	0.0224	0.1007	0.0013	0.0013	0.0073	0.0251	0.0122	0.0000	0.0000	0.0000	0.0030	0.0000	0.0000	0.0000	0.0015	0.0054	0.0000	0.0000	0.0000	0.0057	0.0069	0.0036	0.0000
OTU_527	O_Agaricales	0.1031	0.0637	0.0581	0.0596	0.0400	0.0542	0.0496	0.0356	0.0010	0.0000	0.0056	0.0000	0.0000	0.0000	0.0000	0.0010	0.0011	0.0000	0.0067	0.0030	0.0000	0.0025	0.0015	0.0030	0.0095	0.0094	0.0085	0.1853	0.0057	0.0059	0.0100	12.3990
OTU_528	D_Fungi	0.0000	0.0000	0.0000	0.0000	0.0000	0.0000	0.0000	0.0000	0.0000	0.0012	0.0000	0.0000	0.0725	0.0976	0.0690	0.0551	0.0000	0.0000	0.0000	0.0000	0.0000	0.0000	0.0000	0.0000	0.0000	0.0000	0.0000	0.0000	0.0091	0.0246	0.0371	0.0019
OTU_529	D_Fungi	0.0020	0.0037	0.0012	0.0013	0.0067	0.0000	0.0008	0.0022	0.0010	0.0000	0.0000	0.0000	0.0000	0.0000	0.0009	0.0000	0.0033	0.0010	0.0054	0.0000	0.0058	0.0037	0.0029	0.0000	0.0231	0.0078	0.0000	0.0019	0.0170	0.0079	0.0009	0.0000
OTU_530	G_Mucor	0.0119	0.0000	0.0157	0.0000	0.0356	0.0010	0.0008	0.0000	0.0060	0.0149	0.0019	0.0013	0.0039	0.0000	0.0152	0.0051	0.0022	0.0000	0.0013	0.0208	0.0029	0.0000	0.0015	0.0015	0.0476	0.1347	0.0034	0.0000	0.0000	0.0000	0.0054	0.0019
OTU_531	G_Diversispora	0.0000	0.0000	0.0000	0.0000	0.0144	0.0038	0.0000	0.0119	0.0010	0.0025	0.0205	0.0067	0.0738	0.0073	0.0251	0.0071	0.0011	0.0000	0.0000	0.0000	0.0015	0.0074	0.0029	0.0105	0.0068	0.0016	0.0000	0.0000	0.0057	0.0010	0.0009	0.0000
OTU_532	D_Fungi	0.0000	0.0000	0.0000	0.0000	0.0000	0.0000	0.0008	0.0000	0.0010	0.0000	0.0000	0.0040	0.0505	0.0305	0.0027	0.0051	0.0000	0.0000	0.0000	0.0000	0.0000	0.0000	0.0000	0.0000	0.0000	0.0000	0.0000	0.0000	0.0000	0.0030	0.0000	0.0000
OTU_533	G_Botryotinia	0.0030	0.0028	0.0012	0.0000	0.0011	0.0133	0.0000	0.0000	0.0000	0.0000	0.0000	0.0027	0.0013	0.0037	0.0403	0.0000	0.0110	0.0020	0.0027	0.0208	0.0073	0.0012	0.0073	0.0045	0.0041	0.0047	0.0102	0.0029	0.0227	0.0089	0.0154	0.0095
OTU_534	D_Fungi	0.0000	0.0000	0.0000	0.0000	0.0000	0.0000	0.0000	0.0000	0.0000	0.0025	0.0000	0.0000	0.0323	0.0696	0.0134	0.0000	0.0000	0.0000	0.0000	0.0000	0.0000	0.0000	0.0000	0.0000	0.0000	0.0000	0.0000	0.0000	0.0000	0.0000	0.0000	0.0000
OTU_535	G_Acrostalagmus	0.0000	0.0000	0.0109	0.0101	0.0033	0.0010	0.0017	0.0032	0.0040	0.0037	0.0056	0.0081	0.0039	0.0000	0.0018	0.0000	0.0011	0.0000	0.0000	0.0015	0.0058	0.0000	0.0058	0.0000	0.0041	0.0016	0.0136	0.0067	0.0148	0.0256	0.0109	0.0114
OTU_536	D_Fungi	0.0069	0.0000	0.0000	0.0025	0.0000	0.0019	0.0008	0.0032	0.0070	0.0000	0.0009	0.0000	0.0013	0.0012	0.0000	0.0010	0.0044	0.0000	0.0027	0.0000	0.0015	0.0000	0.0000	0.0000	0.0000	0.0016	0.0017	0.0000	0.0000	0.0000	0.0009	0.0000
OTU_537	G_Waitea	0.1665	0.0009	0.0944	0.9506	0.0011	0.0114	0.0160	0.0000	0.0010	0.0000	0.0000	0.0000	0.0000	0.0024	0.0000	0.0000	0.0000	0.0080	0.0000	0.0000	0.0131	0.0111	0.0000	0.0000	0.0000	0.0000	0.0000	0.0000	0.2772	0.0000	0.0009	0.0000
OTU_538	G_Claroideoglomus	0.0000	0.0000	0.0000	0.0000	0.0011	0.0029	0.0025	0.0032	0.0000	0.0000	0.0047	0.0000	0.0000	0.0000	0.0000	0.0000	0.0000	0.0000	0.0000	0.0000	0.0000	0.0049	0.0000	0.0000	0.0000	0.0000	0.0000	0.0000	0.0000	0.0000	0.0000	0.0000
OTU_539	D_Fungi	0.0010	0.0000	0.0012	0.0000	0.0000	0.0000	0.0000	0.0022	0.0000	0.0025	0.0000	0.0000	0.0013	0.0024	0.0018	0.0000	0.0000	0.0000	0.0000	0.0000	0.0000	0.0000	0.0000	0.0000	0.0027	0.0000	0.0000	0.0000	0.0000	0.0000	0.0000	0.0000
OTU_540	G_Trichocladium	0.0010	0.0103	0.0000	0.0025	0.0000	0.0019	0.0025	0.0000	0.0010	0.0000	0.0019	0.0081	0.0013	0.0012	0.0045	0.0000	0.0044	0.0010	0.0000	0.0015	0.0000	0.0000	0.0015	0.0060	0.0000	0.0031	0.0017	0.0019	0.0000	0.0000	0.0000	0.0000
OTU_541	O_Sporidiobolales	0.0000	0.0037	0.0073	0.0000	0.0022	0.0010	0.0000	0.0022	0.0000	0.0000	0.0000	0.0000	0.0000	0.0000	0.0000	0.0010	0.0055	0.0020	0.0027	0.0000	0.0029	0.0000	0.0000	0.0000	0.0027	0.0000	0.0000	0.0029	0.0011	0.0030	0.0018	0.0076
OTU_542	G_Thelebolus	0.0010	0.0000	0.0000	0.0000	0.0000	0.0000	0.0000	0.0022	0.0000	0.0000	0.0028	0.0000	0.0000	0.0000	0.0027	0.0020	0.0022	0.0000	0.0027	0.0030	0.0000	0.0000	0.0000	0.0000	0.0068	0.0000	0.0000	0.0000	0.0000	0.0000	0.0009	0.0019
OTU_543	P_Ascomycota	0.0000	0.0000	0.0000	0.0000	0.0000	0.0000	0.0000	0.0000	0.0110	0.0012	0.0075	0.0027	0.0013	0.0110	0.0000	0.0102	0.0000	0.0010	0.0000	0.0000	0.0000	0.0000	0.0000	0.0000	0.0054	0.0031	0.0000	0.0067	0.0011	0.0010	0.0091	0.0057
OTU_544	F_Schizoporaceae	0.0050	0.0084	0.0061	0.0089	0.0167	0.0057	0.0093	0.0043	0.0010	0.0050	0.0000	0.0054	0.0000	0.0024	0.0000	0.0000	0.0066	0.0010	0.0081	0.0000	0.0029	0.0025	0.0029	0.0000	0.0000	0.0000	0.0000	0.0000	0.0000	0.0000	0.0036	0.0000
OTU_545	D_Fungi	0.0000	0.0000	0.0000	0.0000	0.0000	0.0000	0.0000	0.0000	0.0100	0.0000	0.0000	0.0081	0.0052	0.0000	0.0000	0.0051	0.0000	0.0000	0.0000	0.0000	0.0000	0.0000	0.0000	0.0000	0.0177	0.0016	0.0051	0.0038	0.0182	0.0010	0.0000	0.0247
OTU_546	D_Fungi	0.0030	0.0009	0.0036	0.0051	0.0089	0.0105	0.0093	0.0043	0.0040	0.0012	0.0047	0.0000	0.0065	0.0134	0.0054	0.0041	0.0077	0.0020	0.0162	0.0194	0.0102	0.0270	0.0263	0.0329	0.0082	0.0047	0.0068	0.0067	0.0023	0.0039	0.0045	0.0057
OTU_547	D_Fungi	0.0000	0.0000	0.0000	0.0000	0.0044	0.0257	0.0059	0.0032	0.0000	0.0000	0.0000	0.0000	0.0000	0.0000	0.0000	0.0000	0.0000	0.0000	0.0000	0.0000	0.0000	0.0000	0.0000	0.0000	0.0122	0.0000	0.0000	0.0000	0.0000	0.0000	0.0000	0.0000
OTU_548	D_Fungi	0.0020	0.0000	0.0012	0.0000	0.0922	0.0618	0.0488	0.0388	0.0000	0.0000	0.0000	0.0000	0.0000	0.0000	0.0009	0.0010	0.0000	0.0000	0.0000	0.0000	0.0000	0.0000	0.0000	0.0000	0.0000	0.0000	0.0000	0.0000	0.0000	0.0000	0.0000	0.0000
OTU_549	D_Fungi	0.0030	0.0019	0.0000	0.0051	0.0011	0.0000	0.0008	0.0000	0.0070	0.0000	0.0047	0.0027	0.0013	0.0000	0.0027	0.0112	0.0088	0.0000	0.0000	0.0000	0.0000	0.0000	0.0000	0.0000	0.0041	0.0000	0.0000	0.0010	0.0000	0.0010	0.0000	0.0000
OTU_550	G_Lecythophora	0.0000	0.0000	0.0000	0.0000	0.0000	0.0000	0.0000	0.0000	0.0010	0.0050	0.0009	0.0000	0.0078	0.0342	0.0063	0.0000	0.0000	0.0000	0.0000	0.0000	0.0000	0.0000	0.0000	0.0000	0.0000	0.0000	0.0000	0.0000	0.0000	0.0000	0.0000	0.0000
OTU_551	D_Fungi	0.0020	0.0000	0.0000	0.0013	0.0022	0.0019	0.0042	0.0000	0.0000	0.0000	0.0000	0.0000	0.0013	0.0000	0.0000	0.0000	0.0011	0.0000	0.0000	0.0000	0.0015	0.0037	0.0029	0.0000	0.0000	0.0000	0.0000	0.0010	0.0000	0.0000	0.0000	0.0000
OTU_552	D_Fungi	0.0030	0.0075	0.0012	0.0013	0.0011	0.0019	0.0042	0.0022	0.0080	0.0025	0.0037	0.0108	0.0039	0.0037	0.0000	0.0000	0.0011	0.0030	0.0013	0.0030	0.0015	0.0025	0.0000	0.0030	0.0014	0.0031	0.0034	0.0029	0.0034	0.0020	0.0036	0.0000
OTU_553	F_Glomeraceae	0.0000	0.0000	0.0000	0.0000	0.0033	0.0019	0.0177	0.0000	0.0010	0.0037	0.0084	0.0000	0.0026	0.0012	0.0018	0.0071	0.0000	0.0000	0.0000	0.0000	0.0000	0.0000	0.0000	0.0000	0.0000	0.0000	0.0000	0.0000	0.0000	0.0010	0.0027	0.0000
OTU_554	G_Glomus	0.0000	0.0000	0.0048	0.0000	0.0011	0.0114	0.0631	0.0032	0.0150	0.0000	0.0000	0.0013	0.0039	0.0110	0.0090	0.0204	0.0000	0.0000	0.0000	0.0000	0.0000	0.0025	0.0029	0.0015	0.0000	0.0000	0.0000	0.0000	0.0000	0.0000	0.0000	0.0000
OTU_555	F_Pezizaceae	0.0020	0.0000	0.0000	0.0013	0.0000	0.0019	0.0017	0.0011	0.0000	0.0050	0.0000	0.0000	0.0000	0.0012	0.0054	0.0010	0.0769	0.0000	0.0000	0.0000	0.0174	0.0061	0.0000	0.0000	0.0082	0.0016	0.0017	0.0172	0.0000	0.0030	0.0000	0.0209
OTU_556	G_Mucor	0.0050	0.0037	0.0073	0.0025	0.0022	0.0152	0.0034	0.0022	0.0160	0.0099	0.0140	0.0175	0.0104	0.0183	0.0117	0.0102	0.0011	0.0000	0.0000	0.0000	0.0029	0.0012	0.0000	0.0030	0.0014	0.0031	0.0034	0.0095	0.0057	0.0020	0.0072	0.0095
OTU_557	D_Fungi	0.0000	0.0000	0.0061	0.0000	0.0133	0.0019	0.0025	0.0011	0.0010	0.0000	0.0000	0.0000	0.0000	0.0024	0.0009	0.0020	0.0011	0.0010	0.0013	0.0000	0.0000	0.0012	0.0015	0.0030	0.0000	0.0031	0.0000	0.0086	0.0000	0.0020	0.0100	0.0303
OTU_558	P_Basidiomycota	0.0010	0.3936	0.0012	0.0038	0.0022	0.0200	0.0109	0.0011	0.0330	0.0000	0.0000	0.0081	0.6547	0.0268	0.0027	0.0306	0.0077	0.0000	0.0000	0.0000	0.0015	0.0000	0.0015	0.0075	0.0000	0.0000	0.0000	0.0000	0.0000	0.0000	0.0163	0.0000
OTU_559	D_Fungi	0.0040	0.0009	0.0000	0.0000	0.0000	0.0000	0.0017	0.0011	0.0040	0.0037	0.0000	0.0040	0.0000	0.0000	0.0009	0.0010	0.0154	0.0010	0.0000	0.0000	0.0000	0.0025	0.0000	0.0045	0.0041	0.0016	0.0017	0.0010	0.0000	0.0059	0.0009	0.0000
OTU_560	G_Mycosphaerella	0.0010	0.0009	0.0000	0.0000	0.0000	0.0000	0.0000	0.0011	0.0000	0.0000	0.0000	0.0000	0.0000	0.0000	0.0045	0.0000	0.0044	0.1006	0.0067	0.0089	0.0916	0.0086	0.1050	0.1720	0.0136	0.0110	0.0305	0.0048	0.2545	0.0148	0.0181	0.0057
OTU_561	D_Fungi	0.0069	0.0009	0.0061	0.0089	0.0011	0.0076	0.0067	0.0054	0.0260	0.0037	0.0019	0.0000	0.0013	0.0268	0.0027	0.0122	0.0319	0.0120	0.0175	0.0194	0.0000	0.0000	0.0015	0.0090	0.0177	0.0047	0.0000	0.0038	0.0000	0.0000	0.0000	0.0000
OTU_562	D_Fungi	0.0000	0.0037	0.0012	0.0013	0.0022	0.0000	0.0017	0.0000	0.0010	0.0000	0.0019	0.0000	0.0039	0.0037	0.0036	0.0000	0.0022	0.0010	0.0027	0.0000	0.0015	0.0000	0.0015	0.0000	0.0000	0.0000	0.0034	0.0010	0.0000	0.0010	0.0000	0.0019
OTU_563	D_Fungi	0.0000	0.0000	0.0000	0.0000	0.0000	0.0000	0.0000	0.0000	0.0000	0.0075	0.0000	0.0000	0.0311	0.0024	0.0027	0.0041	0.0000	0.0000	0.0000	0.0000	0.0000	0.0000	0.0000	0.0000	0.0000	0.0000	0.0000	0.0000	0.0023	0.0030	0.0000	0.0000
OTU_564	D_Fungi	0.0010	0.0000	0.0000	0.0000	0.0834	0.0685	0.0429	0.0183	0.0030	0.0000	0.0000	0.0000	0.0000	0.0012	0.0036	0.0000	0.0000	0.0000	0.0000	0.0000	0.0015	0.0037	0.0000	0.0000	0.0000	0.0000	0.0000	0.0000	0.0023	0.0000	0.0000	0.0019
OTU_565	G_Rhizophagus	0.0000	0.0000	0.0024	0.0038	0.0556	0.0200	0.1144	0.1293	0.0060	0.0012	0.0065	0.0013	0.0673	0.0976	0.0099	0.0724	0.0000	0.0010	0.0000	0.0000	0.0000	0.0000	0.0000	0.0030	0.0000	0.0000	0.0000	0.0000	0.0000	0.0000	0.0000	0.0000
OTU_566	D_Fungi	0.0020	0.0000	0.0000	0.0000	0.0000	0.0000	0.0000	0.0000	0.0180	0.0249	0.0000	0.0040	0.0155	0.0000	0.0000	0.0010	0.0000	0.0000	0.0148	0.0045	0.0000	0.0000	0.0000	0.0000	0.0231	0.0000	0.0102	0.0010	0.0000	0.0000	0.0000	0.0019
OTU_567	D_Fungi	0.0000	0.0000	0.0000	0.0000	0.0000	0.0000	0.0000	0.0000	0.0000	0.0497	0.0037	0.0000	0.0155	0.0330	0.0287	0.0000	0.0000	0.0219	0.0000	0.0000	0.0000	0.0000	0.0015	0.0000	0.0000	0.0000	0.0000	0.0000	0.0000	0.0010	0.0000	0.0019
OTU_568	G_Zygowilliopsis	0.0000	0.0000	0.0000	0.0000	0.0056	0.0029	0.0008	0.0000	0.0000	0.0012	0.0149	0.0000	0.0000	0.0171	0.0000	0.0000	0.0000	0.0000	0.0000	0.0000	0.0000	0.0000	0.0000	0.0000	0.0000	0.0000	0.0000	0.0000	0.0000	0.0000	0.0000	0.0000
OTU_569	G_Claroideoglomus	0.0000	0.0000	0.0000	0.0000	0.0000	0.0010	0.0025	0.0000	0.0150	0.0025	0.0298	0.0000	0.0000	0.0000	0.0063	0.0031	0.0000	0.0010	0.0000	0.0000	0.0000	0.0000	0.0000	0.0000	0.0027	0.0000	0.0000	0.0010	0.0000	0.0000	0.0027	0.0038
OTU_570	G_Funneliformis	0.0020	0.0066	0.0024	0.1381	0.3357	0.2883	0.5284	0.2177	0.2499	0.0087	0.0373	0.0834	0.1837	0.6639	0.4060	0.3172	0.0011	0.0020	0.0013	0.0015	0.1003	0.1093	0.1065	0.0030	0.0095	0.0110	0.0102	0.0000	0.7113	0.0295	0.0815	0.1346
OTU_571	D_Fungi	0.0000	0.0000	0.0000	0.0013	0.0000	0.0000	0.0000	0.0000	0.0010	0.0000	0.0000	0.0027	0.0039	0.0049	0.0009	0.0031	0.0000	0.0000	0.0000	0.0000	0.0000	0.0012	0.0000	0.0000	0.0027	0.0016	0.0000	0.0000	0.0000	0.0000	0.0000	0.0000
OTU_572	D_Fungi	0.0010	0.0009	0.0048	0.0013	0.0044	0.0019	0.0042	0.0011	0.0050	0.0025	0.0047	0.0040	0.0026	0.0024	0.0054	0.0061	0.0088	0.0080	0.0081	0.0000	0.0102	0.0098	0.0044	0.0030	0.0082	0.0125	0.0017	0.0067	0.0080	0.0157	0.0063	0.0038
OTU_573	D_Fungi	0.0109	0.0037	0.0000	0.0025	0.0022	0.0000	0.0000	0.0399	0.0170	0.0000	0.0000	0.0027	0.0026	0.0012	0.0036	0.0143	0.0143	0.0000	0.0013	0.0015	0.0029	0.0012	0.0015	0.0075	0.0041	0.0000	0.0017	0.0019	0.0011	0.0000	0.0009	0.0133
OTU_574	G_Ascobolus	0.0000	0.0000	0.0061	0.0000	0.0000	0.0000	0.0000	0.0043	0.0000	0.0000	0.0000	0.0000	0.0000	0.0000	0.0000	0.2244	0.0000	0.0000	0.0175	0.0000	0.0000	0.0160	0.0000	0.1495	0.0299	0.0031	0.0424	0.3696	0.4454	0.0000	0.0000	0.0209
OTU_575	D_Fungi	0.0000	0.0000	0.0000	0.0000	0.0022	0.0000	0.0000	0.0032	0.0020	0.0050	0.0270	0.0000	0.0013	0.0024	0.0000	0.0000	0.0000	0.0000	0.0000	0.0000	0.0000	0.0000	0.0000	0.0000	0.0516	0.0000	0.0000	0.0000	0.0000	0.0000	0.0190	0.0000
OTU_576	D_Fungi	0.0030	0.0000	0.0036	0.0000	0.0000	0.0010	0.0008	0.0000	0.0010	0.0000	0.0000	0.0040	0.0000	0.0037	0.0000	0.0000	0.0110	0.0010	0.0000	0.0015	0.0015	0.0000	0.0000	0.0000	0.0014	0.0031	0.0000	0.0010	0.0011	0.0000	0.0009	0.0000
OTU_577	D_Fungi	0.0000	0.0037	0.0000	0.0013	0.0245	0.0114	0.0076	0.0000	0.0000	0.0000	0.0000	0.0000	0.0000	0.0000	0.0000	0.0000	0.0000	0.0000	0.0000	0.0000	0.0000	0.0000	0.0000	0.0000	0.0000	0.0000	0.0000	0.0000	0.0000	0.0000	0.0000	0.0000
OTU_578	G_Psilocybe	0.0010	0.0000	0.0000	0.0000	0.0000	0.0000	0.0000	0.0011	0.0010	0.0025	0.0000	0.0040	0.0000	0.0000	0.0054	0.0020	0.0000	0.0000	0.0000	0.0000	0.0000	0.0000	0.0000	0.0000	0.0000	0.0000	0.0000	0.0000	0.0000	0.0000	0.0000	0.0000
OTU_579	D_Fungi	0.0040	0.0009	0.0000	0.0000	0.0000	0.0000	0.0000	0.0345	0.0000	0.0012	0.0000	0.0000	0.0000	0.0085	0.0000	0.0245	0.0000	0.0000	0.0000	0.0000	0.0000	0.0246	0.0000	0.0000	0.0000	0.0000	0.0000	0.0000	0.0000	0.0000	0.0000	0.0000
OTU_580	G_Scytalidium	0.0069	0.1855	0.0012	0.0304	0.0011	0.0067	0.0034	0.0043	0.0000	0.0000	0.0019	0.0013	0.0000	0.0000	0.0000	0.0000	0.0417	0.0000	0.0013	0.0000	0.0116	0.0000	0.0000	0.0000	0.0082	0.0000	0.0000	0.0000	0.0000	0.0030	0.0000	0.0000
OTU_581	D_Fungi	0.0010	0.0037	0.0024	0.0000	0.0000	0.0000	0.0008	0.0011	0.0060	0.0012	0.0084	0.0094	0.0000	0.0024	0.0009	0.0000	0.0022	0.0000	0.0215	0.0074	0.0044	0.0000	0.0000	0.0000	0.0082	0.0000	0.0153	0.0019	0.0125	0.0049	0.0018	0.0038
OTU_582	D_Fungi	0.0159	0.0028	0.0000	0.0038	0.0033	0.0029	0.0067	0.0097	0.0050	0.0012	0.0000	0.0027	0.0013	0.0012	0.0009	0.0000	0.0275	0.0010	0.0027	0.0000	0.0044	0.0061	0.0000	0.0000	0.0054	0.0016	0.0051	0.0019	0.0023	0.0020	0.0018	0.0019
OTU_583	D_Fungi	0.0040	0.0009	0.0000	0.0000	0.0211	0.0000	0.0000	0.0000	0.0070	0.0037	0.0084	0.0054	0.0000	0.0024	0.0000	0.0000	0.0000	0.0010	0.0000	0.0000	0.0000	0.0000	0.0000	0.0000	0.0000	0.0110	0.0000	0.0000	0.0000	0.0000	0.0000	0.0000
OTU_584	O_Sordariales	0.0010	0.0000	0.0097	0.0000	0.1734	0.0000	0.0000	0.0054	0.0010	0.0000	0.0000	0.0578	0.0000	0.0000	0.0000	0.0000	0.0000	0.0000	0.0000	0.1817	0.0000	0.0000	0.0000	0.0733	0.0000	0.0063	0.0000	0.0000	0.0000	0.0000	0.0000	0.0000
OTU_585	D_Fungi	0.0040	0.0009	0.0000	0.0000	0.0044	0.0067	0.0059	0.0097	0.0010	0.0000	0.0000	0.0000	0.0013	0.0037	0.0036	0.0428	0.0154	0.0000	0.0013	0.0074	0.0058	0.0012	0.0029	0.0209	0.0014	0.0000	0.0000	0.0000	0.0000	0.0020	0.0072	0.0057
OTU_586	D_Fungi	0.0020	0.0000	0.0000	0.0025	0.0178	0.0000	0.0606	0.0334	0.0000	0.0000	0.0009	0.0242	0.0091	0.0000	0.0036	0.0000	0.0231	0.0000	0.0283	0.0000	0.0000	0.0233	0.0029	0.0000	0.0014	0.0000	0.0000	0.0000	0.0011	0.0069	0.0018	0.0019
OTU_587	D_Fungi	0.0069	0.0009	0.0012	0.0000	0.0022	0.0019	0.0042	0.0119	0.0190	0.0075	0.0019	0.0040	0.0039	0.0024	0.0054	0.0102	0.0077	0.0000	0.0000	0.0030	0.0029	0.0000	0.0000	0.0000	0.0082	0.0016	0.0017	0.0057	0.0023	0.0030	0.0081	0.0228
OTU_588	D_Fungi	0.0069	0.0000	0.0000	0.0000	0.0011	0.0029	0.0008	0.0011	0.0010	0.0000	0.0009	0.0013	0.0013	0.0012	0.0000	0.0051	0.0099	0.0010	0.0135	0.0030	0.0000	0.0037	0.0000	0.0045	0.0095	0.0078	0.0051	0.0019	0.0000	0.0020	0.0018	0.0057
OTU_589	G_Pyrenophora	0.0000	0.0019	0.0048	0.0025	0.0022	0.0029	2.0000	0.0011	0.0100	0.0012	0.0000	0.0013	0.0000	0.0061	0.0027	0.0010	0.0000	0.0000	0.0094	0.0045	0.0000	0.0000	0.0073	0.0000	0.0000	0.0000	0.0000	0.0010	0.0000	0.0000	0.0045	0.0000
OTU_590	G_Waitea	0.0000	0.0000	0.0000	0.0000	0.0044	0.0010	0.0000	0.0011	0.0040	0.0000	0.0000	0.0027	0.0039	0.0000	0.0054	0.0000	0.0033	0.0010	0.0027	0.1176	5.8948	0.0049	0.0044	0.0060	0.1155	0.0548	0.0746	0.0095	0.0000	0.0020	0.0009	0.0000
OTU_591	D_Fungi	0.0000	0.0000	0.0000	0.0000	0.0000	0.0000	0.0000	0.0022	0.0000	0.0012	0.0000	0.0000	0.0052	0.0049	0.0000	0.0031	0.0000	0.0000	0.0000	0.0000	0.0000	0.0000	0.0000	0.0000	0.0000	0.0000	0.0000	0.0000	0.0000	0.0000	0.0000	0.0000
OTU_592	C_Sordariomycetes	0.0000	0.0000	0.0024	0.0013	0.7547	0.0010	0.0000	0.0011	0.0000	0.0000	0.0000	0.0000	0.0388	0.0293	0.0502	0.0010	0.0000	0.0000	0.0000	0.0000	0.0000	0.0000	0.0000	0.0000	0.0449	0.0000	0.0000	0.0000	0.0250	0.0059	0.0127	0.1100
OTU_593	D_Fungi	0.0010	0.0000	0.0000	0.0000	0.0000	0.0000	0.0000	0.0043	0.0020	0.0050	0.0000	0.0013	0.0039	0.0061	0.0018	0.0000	0.0000	0.0000	0.0000	0.0015	0.0000	0.0000	0.0000	0.0000	0.0014	0.0000	0.0102	0.0000	0.0000	0.0020	0.0000	0.0000
OTU_594	G_Ramicandelaber	0.0020	0.0009	0.0000	0.0000	0.0022	0.0000	0.0000	0.0000	0.0000	0.0062	0.0019	0.0013	0.0039	0.0061	0.0036	0.0031	0.0033	0.0010	0.0000	0.0015	0.0058	0.0000	0.0000	0.0000	0.0000	0.0000	0.0034	0.0019	0.0011	0.0098	0.0063	0.0057
OTU_595	C_Chytridiomycetes	0.0030	0.0000	0.0000	0.0000	0.0078	0.0152	0.0025	0.0022	0.0000	0.0000	0.0000	0.0000	0.0065	0.0049	0.0009	0.0000	0.0000	0.0000	0.0000	0.0000	0.0102	0.0049	0.0000	0.0000	0.0000	0.0000	0.0000	0.0000	0.0193	0.0059	0.0344	0.0000
OTU_596	D_Fungi	0.0059	0.0019	0.0048	0.0013	0.0011	0.0038	0.0042	0.0043	0.0000	0.0000	0.0065	0.0013	0.0000	0.0000	0.0018	0.0010	0.0011	0.0020	0.0000	0.0015	0.0015	0.0000	0.0015	0.0045	0.0014	0.0016	0.0017	0.0010	0.0011	0.0000	0.0009	0.0019
OTU_597	D_Fungi	0.0000	0.0000	0.0000	0.0051	0.0000	0.0010	0.0000	0.0000	0.0250	0.0062	0.0075	0.0000	0.0052	0.0012	0.0000	0.0000	0.0000	0.0040	0.0000	0.0000	0.0000	0.0000	0.0000	0.0000	0.0041	0.0031	0.0017	0.0000	0.0102	0.0079	0.0036	0.0114
OTU_598	D_Fungi	0.0000	0.0000	0.0000	0.0000	0.0011	0.0048	0.0034	0.0075	0.0000	0.0000	0.0000	0.0013	0.0013	0.0037	0.0009	0.0000	0.0000	0.0000	0.0013	0.0000	0.0102	0.0012	0.0044	0.0045	0.0000	0.0016	0.0000	0.0000	0.0000	0.0000	0.0000	0.0038
OTU_599	D_Fungi	0.0010	0.0000	0.0024	0.0000	0.0000	0.0000	0.0000	0.0000	0.0100	0.0124	0.0065	0.0054	0.0013	0.0024	0.0018	0.0010	0.0000	0.0000	0.0000	0.0000	0.0000	0.0000	0.0000	0.0000	0.0122	0.0047	0.0017	0.0076	0.0045	0.0020	0.0100	0.0095
OTU_600	G_Myrmecridium	0.0000	0.0019	0.0000	0.0000	0.0000	0.0000	0.0000	0.0011	0.0040	0.0000	0.0009	0.0081	0.0181	0.0012	0.0000	0.0102	0.0000	0.0000	0.0000	0.0000	0.0000	0.0000	0.0000	0.0000	0.0000	0.0000	0.0000	0.0000	0.0000	0.0000	0.0000	0.0000
OTU_601	D_Fungi	0.0000	0.0000	0.0073	0.0000	0.0022	0.0076	0.0059	0.0032	0.0000	0.0025	0.0009	0.0000	0.0039	0.0110	0.0000	0.0041	0.0022	0.0000	0.0027	0.0015	0.0058	0.0000	0.0015	0.0000	0.0014	0.0000	0.0000	0.0076	0.0011	0.0030	0.0000	0.0076
OTU_602	P_Glomeromycota	0.0000	0.0000	0.0000	0.0000	0.0000	0.0086	0.0000	0.0000	0.0000	0.0000	0.0317	0.0013	0.0194	0.0000	0.0009	0.0082	0.0000	0.0000	0.0000	0.0000	0.0000	0.0000	0.0000	0.0000	0.0000	0.0000	0.0000	0.0000	0.0000	0.0000	0.0000	0.0000
OTU_603	D_Fungi	0.0208	0.0131	0.0678	0.0203	0.0389	0.0219	0.0387	0.0237	0.0100	0.0137	0.0093	0.0081	0.0091	0.0146	0.0134	0.0082	0.0033	0.0040	0.0121	0.0089	0.0058	0.0061	0.0015	0.0090	0.0054	0.0078	0.0034	0.0086	0.0205	0.0098	0.0100	0.0095
OTU_604	G_Exophiala	0.0000	0.0047	0.0012	0.0735	0.0233	0.0076	0.0008	0.0119	0.0060	0.0087	0.2154	0.0175	0.0181	0.0281	0.0143	0.0469	0.0022	0.0020	0.1562	0.0223	0.0087	0.0675	0.0831	0.1929	0.0095	0.0016	0.0288	0.0000	0.0023	0.0030	0.0018	0.0379
OTU_605	G_Stagonospora	0.0020	0.0000	0.0012	0.0000	0.0000	0.0010	0.0000	0.0140	0.0000	0.0012	0.0000	0.0027	0.0026	0.0024	0.0090	0.0000	0.0000	0.0010	0.0000	0.0000	0.0000	0.0000	0.0000	0.0000	0.0000	0.0000	0.0000	0.0000	0.0000	0.0000	0.0000	0.0000
OTU_606	D_Fungi	0.0000	0.0000	0.0000	0.0000	0.0022	0.0048	0.0067	0.0000	0.0000	0.0000	0.0000	0.0000	0.0000	0.0000	0.0045	0.0000	0.0351	0.0030	0.0000	0.1087	0.0015	0.0258	0.0117	0.0374	0.0000	0.0000	0.0000	0.0000	0.0011	0.0010	0.0009	0.0000
OTU_607	D_Fungi	0.0059	0.0000	0.0000	0.0013	0.0100	0.0133	0.0076	0.0000	0.0010	0.0025	0.0019	0.0027	0.0013	0.0000	0.0027	0.0020	0.0165	0.0020	0.0000	0.0015	0.0044	0.0098	0.0088	0.0090	0.0163	0.0047	0.0034	0.0000	0.0011	0.0010	0.0009	0.0038
OTU_608	G_Claroideoglomus	0.0000	0.0019	0.0000	0.0000	0.0078	0.0010	0.0034	0.0140	0.0000	0.0000	0.0000	0.0000	0.0000	0.0000	0.0000	0.0000	0.0000	0.0000	0.0013	0.0000	0.0015	0.0061	0.0015	0.0000	0.0000	0.0000	0.0000	0.0000	0.0000	0.0000	0.0000	0.0038
OTU_609	P_Ascomycota	0.0010	0.0019	0.0000	0.0000	0.0033	0.0019	0.0025	0.0022	0.0000	0.0000	0.0000	0.0000	0.0039	0.0000	0.0000	0.0000	0.0011	0.0090	0.0013	0.0045	0.0800	0.1596	0.0058	0.4187	0.0014	0.0000	0.0000	0.0000	0.0000	0.0000	0.0018	0.0000
OTU_610	D_Fungi	0.0119	0.0019	0.0000	0.0051	0.0056	0.0019	0.0076	0.0054	0.0000	0.0000	0.0000	0.0000	0.0000	0.0000	0.0000	0.0000	0.0220	0.0010	0.0000	0.0000	0.0058	0.0098	0.0000	0.0000	0.0014	0.0031	0.0000	0.0000	0.0000	0.0010	0.0000	0.0000
OTU_611	D_Fungi	0.0149	0.0000	0.0000	0.0000	0.0022	0.0000	0.0000	0.0172	0.0030	0.0025	0.0000	0.0000	0.0000	0.0000	0.0000	0.0010	0.0209	0.0000	0.0000	0.0000	0.0000	0.0000	0.0000	0.0015	0.0082	0.0000	0.0000	0.0000	0.0000	0.0000	0.0000	0.0095
OTU_612	G_Glomus	0.0010	0.0000	0.0000	0.0013	0.0089	0.0343	0.0067	0.1078	0.0030	0.0000	0.0000	0.0013	0.0427	0.0696	0.0143	0.0133	0.0000	0.0000	0.0067	0.0000	0.0000	0.0000	0.0131	0.0000	0.0027	0.0047	0.0000	0.0000	0.0000	0.0049	0.0009	0.0038
OTU_613	F_Herpotrichiellaceae	0.0000	0.0037	0.0061	0.0038	0.0000	0.0010	0.0000	0.0011	0.0000	0.0012	0.0000	0.0027	0.0000	0.0012	0.0000	0.0000	0.0044	0.0000	0.0000	0.0000	0.0000	0.0000	0.0000	0.0000	0.0000	0.0000	0.0017	0.0000	0.0023	0.0000	0.0000	0.0019
OTU_614	D_Fungi	0.0287	0.0000	0.0170	0.0000	0.0011	0.0010	0.0000	0.0000	0.0300	0.0000	0.0000	0.0040	0.0285	0.0000	0.0000	0.0000	0.0022	0.0149	0.0121	0.0164	0.0044	0.0000	0.0000	0.0075	0.0054	0.0000	0.0017	0.0000	0.0011	0.0010	0.0000	0.0000
OTU_615	D_Fungi	0.0010	0.0019	0.0012	0.0000	0.0033	0.0048	0.7665	0.0043	0.0000	0.0000	0.0000	0.0000	0.0000	0.0000	0.0000	0.0010	0.0000	0.0000	0.0000	0.0000	0.0000	0.0000	0.0015	0.0000	0.0000	0.0000	0.0000	0.0029	0.0000	0.0000	0.0018	0.0000
OTU_616	D_Fungi	0.0059	0.0019	0.0000	0.0013	0.0000	0.0000	0.0008	0.0000	0.0030	0.0025	0.0000	0.0013	0.0000	0.0000	0.0000	0.0031	0.0165	0.0030	0.0094	0.0060	0.0015	0.0049	0.0029	0.0030	0.0000	0.0000	0.0000	0.0000	0.0000	0.0000	0.0000	0.0038
OTU_617	G_Bensingtonia	0.0000	0.0000	0.0012	0.0000	0.0044	0.0019	0.0034	0.0011	0.0000	0.0000	0.0000	0.0013	0.0000	0.0024	0.0009	0.0000	0.0055	0.0110	0.0094	0.0104	0.0058	0.0209	0.0365	0.0239	0.0054	0.0016	0.0034	0.0000	0.0170	0.0059	0.0118	0.0038
OTU_618	C_Tremellomycetes	0.0020	0.0000	0.0000	0.0000	0.0011	0.0019	0.0034	0.0000	0.0000	0.0012	0.0000	0.0000	0.0000	0.0037	0.0000	0.0000	0.0000	0.0010	0.0000	0.0015	0.0000	0.0000	0.0029	0.0000	0.0000	0.0000	0.0000	0.0000	0.0011	0.0000	0.0000	0.0000
OTU_619	F_Ustilaginaceae	0.0020	0.0000	0.0000	0.0013	0.0000	0.0010	0.0000	0.0000	0.0000	0.0012	0.0028	0.0013	0.0026	0.0000	0.0018	0.0000	0.0000	0.0020	0.0000	0.0030	0.0073	0.0025	0.0306	0.0000	0.0000	0.0000	0.0034	0.0000	0.0023	0.0000	0.0000	0.0057
OTU_620	O_Pleosporales	0.0000	0.0037	0.0000	0.0013	0.0044	0.0000	0.0000	0.0000	0.0000	0.0000	0.0877	0.0000	0.0026	0.0024	0.0000	0.0000	0.0000	0.0000	0.0000	0.0000	0.0000	0.0000	0.0000	0.0000	0.0000	0.0000	0.0000	0.0000	0.0000	0.0000	0.0000	0.0000
OTU_621	O_Polyporales	0.0000	0.0028	0.0012	0.0000	0.0056	0.0000	0.0008	0.0011	0.0000	0.0037	0.0009	0.0013	0.0026	0.0000	0.0009	0.0000	0.0011	0.0000	0.0000	0.0000	0.0015	0.0025	0.0000	0.0000	0.0000	0.0016	0.0000	0.0000	0.0000	0.0010	0.0009	0.0019
OTU_622	D_Fungi	0.0089	0.0019	0.0000	0.0000	0.0000	0.0010	0.0034	0.0022	0.0000	0.0000	0.0000	0.0000	0.0000	0.0000	0.0000	0.0031	0.0044	0.0000	0.0000	0.0000	0.0000	0.0000	0.0000	0.0030	0.0014	0.0000	0.0000	0.0000	0.0011	0.0010	0.0000	0.0019
OTU_623	G_Volvariella	0.0030	0.0009	0.0024	0.0000	0.0144	0.0019	0.0017	0.0000	0.0030	0.0037	0.0028	0.0013	0.0052	0.0061	0.0134	0.0061	0.0000	0.0000	0.0000	0.0000	0.0000	0.0000	0.0000	0.0000	0.0000	0.0000	0.0000	0.0010	0.0011	0.0020	0.0000	0.0019
OTU_624	D_Fungi	0.0010	0.0000	0.0000	0.0013	0.0000	0.0000	0.0017	0.0000	0.0040	0.0000	0.0000	0.0027	0.0013	0.0037	0.0000	0.0010	0.0022	0.0000	0.0067	0.0268	0.0015	0.0000	0.0015	0.0030	0.0014	0.0000	0.0017	0.0010	0.0034	0.0049	0.0027	0.0038
OTU_625	D_Fungi	0.0040	0.0066	0.0024	0.0013	0.0033	0.0019	0.0025	0.0011	0.0040	0.0025	0.0009	0.0013	0.0000	0.0024	0.0000	0.0010	0.0077	0.0010	0.0027	0.0045	0.0029	0.0012	0.0015	0.0015	0.0014	0.0031	0.0051	0.0000	0.0000	0.0010	0.0000	0.0000
OTU_626	D_Fungi	0.0000	0.0000	0.0000	0.0000	0.0000	0.0000	0.0000	0.0011	0.0020	0.0000	0.0047	0.0027	0.0000	0.0000	0.0036	0.0000	0.0000	0.0000	0.0000	0.0000	0.0000	0.0000	0.0000	0.0000	0.0054	0.0000	0.0000	0.0000	0.0000	0.0000	0.0045	0.0000
OTU_627	G_Tetracladium	0.0040	0.0037	0.0981	0.0165	0.0011	0.0304	0.0017	0.0011	0.1880	0.1491	0.0065	0.0161	0.0000	0.0293	0.0072	0.0092	0.0088	0.0259	0.0067	0.0000	0.0015	0.0025	0.0000	0.0000	0.0870	0.0407	0.0068	0.0554	0.0023	0.0010	0.0000	0.0114
OTU_628	C_Glomeromycetes	0.0000	0.0000	0.0000	0.0000	0.0000	0.0000	0.0000	0.0000	0.0000	0.0000	0.0028	0.0000	0.0026	0.0000	0.0018	0.0000	0.0000	0.0000	0.0000	0.0000	0.0000	0.0000	0.0000	0.0000	0.0000	0.0000	0.0000	0.0000	0.0000	0.0000	0.0009	0.0000
OTU_629	G_Hannaella	0.0000	0.0000	0.0000	0.0013	0.0000	0.0000	0.0000	0.0000	0.0040	0.0012	0.0019	0.0027	0.0000	0.0000	0.0000	0.0000	0.0000	0.0000	0.0000	0.0000	0.0000	0.0000	0.0000	0.0000	0.0000	0.0000	0.0000	0.0000	0.0000	0.0000	0.0000	0.0000
OTU_630	D_Fungi	0.0000	0.0019	0.0000	0.0000	0.0022	0.0029	0.0000	0.0022	0.0000	0.0012	0.0009	0.0000	0.0039	0.0012	0.0018	0.0000	0.0011	0.0040	0.0027	0.0015	0.0000	0.0025	0.0044	0.0000	0.0014	0.0047	0.0034	0.0029	0.0011	0.0039	0.0054	0.0000
OTU_631	D_Fungi	0.0268	0.0094	0.0182	0.0190	0.0189	0.0114	0.0135	0.0237	0.0200	0.0199	0.0233	0.0363	0.0323	0.0281	0.0260	0.0153	0.0143	0.0149	0.0458	0.0313	0.0305	0.0147	0.0875	0.0553	0.0231	0.0313	0.0577	0.0344	0.0057	0.0089	0.0091	0.0303
OTU_632	G_Embellisia	0.0000	0.0000	0.0000	0.0000	0.0011	0.0000	0.0000	0.0000	0.0000	0.0000	0.0000	0.0000	0.0000	0.0000	0.0018	0.0041	0.0000	0.0000	0.0000	0.0000	0.0145	0.0074	0.0175	0.0329	0.0557	0.0438	0.0187	0.0019	0.0977	0.0886	0.0733	0.0588
OTU_633	P_Ascomycota	0.0000	0.0000	0.0000	0.0025	0.0011	0.0247	0.0050	0.0011	0.0000	0.0000	0.0000	0.0013	0.0000	0.0012	0.0000	0.0000	0.0000	0.0000	0.0000	0.0000	0.0000	0.0025	0.0000	0.0000	0.0000	0.0000	0.0000	0.0019	0.0000	0.0059	0.0000	0.0000
OTU_634	G_Chloridium	0.0010	0.0000	0.0000	0.0000	0.0000	0.0000	0.0000	0.0000	0.0000	0.0000	0.0000	0.0000	0.0388	0.0049	0.0045	0.0000	0.0000	0.0000	0.0000	0.0015	0.0000	0.0000	0.0000	0.0120	0.0000	0.0000	0.0000	0.0000	0.0011	0.0020	0.0027	0.0190
OTU_635	G_Cryptococcus	0.0000	0.0000	0.0000	0.0000	0.0000	0.0010	0.0000	0.0000	0.0060	0.0012	0.0000	0.0161	0.0000	0.0049	0.0000	0.0010	0.0000	0.0000	0.0000	0.0000	0.0000	0.0000	0.0000	0.0000	0.0000	0.0000	0.0000	0.0000	0.0000	0.0000	0.0000	0.0000
OTU_636	D_Fungi	0.0000	0.0000	0.0000	0.0025	0.0000	0.0000	0.0017	0.0000	0.0010	0.0012	0.0047	0.0027	0.0000	0.0000	0.0027	0.0000	0.0000	0.0000	0.0054	0.0030	0.0145	0.0098	0.0102	0.0120	0.0014	0.0078	0.0017	0.0000	0.0057	0.0039	0.0018	0.0095
OTU_637	D_Fungi	0.0020	0.0000	0.0024	0.0038	0.0033	0.0000	0.0008	0.0065	0.0090	0.0075	0.0009	0.0054	0.0039	0.0049	0.0054	0.0020	0.0011	0.0010	0.0027	0.0045	0.0015	0.0025	0.0015	0.0060	0.0027	0.0031	0.0000	0.0019	0.0000	0.0010	0.0072	0.0133
OTU_638	D_Fungi	0.0000	0.0000	0.0000	0.0000	0.0000	0.0000	0.0000	0.0000	0.0050	0.0000	0.0028	0.0013	0.0000	0.0085	0.0117	0.0010	0.0000	0.0020	0.0000	0.0015	0.0000	0.0000	0.0000	0.0434	0.0054	0.0000	0.0000	0.0048	0.0000	0.0000	0.0027	0.0000
OTU_639	D_Fungi	0.0129	0.0000	0.0012	0.0000	0.0000	0.0019	0.0000	0.0086	0.0020	0.0000	0.0000	0.0000	0.0000	0.0012	0.0000	0.0010	0.0000	0.0000	0.0000	0.0000	0.0000	0.0000	0.0000	0.0000	0.0000	0.0000	0.0000	0.0000	0.0000	0.0010	0.0000	0.0038
OTU_640	D_Fungi	0.0099	0.0037	0.0012	0.0025	0.0000	0.0010	0.0000	0.0097	0.0060	0.0025	0.0009	0.0094	0.0013	0.0024	0.0018	0.0082	0.0022	0.0000	0.0000	0.0000	0.0000	0.0012	0.0000	0.0045	0.0027	0.0000	0.0000	0.0010	0.0023	0.0030	0.0027	0.0057
OTU_641	D_Fungi	0.0000	0.0037	0.0000	0.0000	0.0000	0.0029	0.0000	0.0000	0.0060	0.0012	0.0009	0.0094	0.0000	0.0000	0.0000	0.0000	0.0000	0.0000	0.0000	0.0000	0.0000	0.0000	0.0000	0.0000	0.0000	0.0000	0.0000	0.0000	0.0000	0.0000	0.0000	0.0000
OTU_642	F_Pyronemataceae	0.0000	0.0000	0.0000	0.0000	0.0089	0.0019	0.0000	0.0011	0.0000	0.0012	0.0000	0.0000	0.0000	0.0037	0.0000	0.0000	0.0000	0.0010	0.0000	0.0000	0.0000	0.0000	0.0000	0.0000	0.0000	0.0000	0.0000	0.0000	0.0000	0.0000	0.0009	0.0000
OTU_643	G_Penicillium	0.0030	0.0019	0.0012	0.0000	0.0000	0.0000	0.0008	0.0000	0.0030	0.0012	0.0019	0.0013	0.0013	0.0073	0.0009	0.0000	0.0000	0.0010	0.0000	0.0000	0.0000	0.0000	0.0000	0.0015	0.0014	0.0000	0.0000	0.0010	0.0000	0.0000	0.0036	0.0000
OTU_644	D_Fungi	0.0208	0.0019	0.0024	0.0000	0.0033	0.0029	0.0025	0.0022	0.0090	0.0012	0.0000	0.0027	0.0013	0.0256	0.0009	0.0041	0.0000	0.0020	0.0040	0.0134	0.0000	0.0000	0.0000	0.0030	0.0000	0.0000	0.0000	0.0010	0.0000	0.0000	0.0000	0.0000
OTU_645	F_Filobasidiaceae	0.0000	0.0019	0.0012	0.0025	0.0144	0.0029	0.0008	0.0000	0.0040	0.0012	0.0047	0.0067	0.0000	0.0024	0.0027	0.0010	0.0000	0.0040	0.0081	0.0030	0.0073	0.0061	0.0160	0.0000	0.0068	0.0000	0.0000	0.0000	0.0000	0.0000	0.0036	0.0000
OTU_646	P_Ascomycota	0.0000	0.0000	0.0000	0.0025	0.0000	0.0010	0.0000	0.0000	0.0010	0.0000	0.0009	0.0054	0.0000	0.0012	0.0027	0.0020	0.0011	0.0010	0.0000	0.0015	0.0015	0.0012	0.0000	0.0015	0.0000	0.0000	0.0051	0.0038	0.0023	0.0020	0.0000	0.0038
OTU_647	D_Fungi	0.0050	0.0009	0.0012	0.0013	0.0011	0.0010	0.0000	0.0000	0.0010	0.0025	0.0000	0.0013	0.0026	0.0037	0.0000	0.0031	0.0000	0.0000	0.0013	0.0000	0.0029	0.0000	0.0000	0.0015	0.0014	0.0000	0.0000	0.0000	0.0000	0.0000	0.0009	0.0000
OTU_648	P_Ascomycota	0.0000	0.0000	0.0000	0.0000	0.0000	0.0000	0.0000	0.0000	0.0000	0.0099	0.0000	0.0054	0.0000	0.0049	0.0000	0.0010	0.0000	0.0000	0.0013	0.0000	0.0058	0.0000	0.0000	0.0000	0.0027	0.0000	0.0000	0.0000	0.0000	0.0049	0.0000	0.0000
OTU_649	D_Fungi	0.0119	0.0000	0.0000	0.0013	0.0000	0.0000	0.0000	0.0032	0.0000	0.0000	0.0000	0.0000	0.0000	0.0000	0.0000	0.0031	0.0099	0.0030	0.0000	0.0015	0.0000	0.0000	0.0000	0.0015	0.0068	0.0016	0.0017	0.0010	0.0011	0.0000	0.0000	0.0038
OTU_650	P_Ascomycota	0.0000	0.0009	0.0000	0.0000	0.0022	0.0000	0.0008	0.0000	0.0080	0.0000	0.0037	0.0645	0.0233	0.0000	0.0000	0.0000	0.0011	0.0000	0.0013	0.0134	0.0000	0.0000	0.0000	0.0000	0.0082	0.0016	0.0017	0.0000	0.1216	0.0000	0.0000	0.0000
OTU_651	G_Claroideoglomus	0.0000	0.0009	0.0012	0.0013	0.0567	0.0352	0.0538	0.0496	0.0140	0.0547	0.0177	0.0148	0.0272	0.0415	0.0457	0.0112	0.0022	0.0000	0.0000	0.0000	0.0029	0.0061	0.0029	0.0090	0.0027	0.0031	0.0000	0.0029	0.0080	0.0089	0.0181	0.0114
OTU_652	D_Fungi	0.0000	0.0000	0.0000	0.0000	0.0000	0.0000	0.0000	0.0000	0.0080	0.0000	0.0131	0.0000	0.0970	0.0000	0.0134	0.0000	0.0000	0.0000	0.0000	0.0000	0.0000	0.0000	0.0000	0.0000	0.0000	0.0000	0.0000	0.0000	0.0000	0.0000	0.0027	0.0076
OTU_653	O_Pleosporales	0.0000	0.0000	0.0000	0.0000	0.0000	0.0476	0.0000	0.0000	0.1030	0.0298	0.0009	0.0000	0.0000	0.0146	0.0009	0.0010	0.0000	0.0000	0.0000	0.0000	0.0000	0.0000	0.0000	0.0000	0.0000	0.0000	0.0000	0.0000	0.0000	0.0000	0.0000	0.0000
OTU_654	G_Ascobolus	0.0000	0.0000	0.0000	0.0038	0.1967	0.0000	0.0185	0.0183	0.0000	0.0000	0.0000	0.0000	0.0026	0.0024	0.0072	0.0000	0.0000	0.0000	0.0000	0.0000	0.0945	0.0012	0.0000	0.0000	0.0014	0.0000	0.0017	0.0000	0.0011	0.0030	0.0000	0.0000
OTU_655	D_Fungi	0.0069	0.0000	0.0000	0.0000	0.0056	0.0000	0.0034	0.0000	0.0000	0.0025	0.0019	0.0000	0.0000	0.0000	0.0018	0.0010	0.0143	0.0020	0.0000	0.0000	0.0029	0.0025	0.0000	0.0000	0.0000	0.0031	0.0000	0.0000	0.0011	0.0000	0.0009	0.0019
OTU_656	D_Fungi	0.0000	0.0000	0.0000	0.0013	0.0011	0.0048	0.0067	0.0011	0.0010	0.0000	0.0000	0.0000	0.0000	0.0085	0.0009	0.0020	0.0022	0.0020	0.0000	0.0015	0.0044	0.0025	0.0015	0.0015	0.0000	0.0063	0.0017	0.0057	0.0057	0.0010	0.0018	0.0076
OTU_657	D_Fungi	0.0010	0.0000	0.0024	0.0000	0.0056	0.0038	0.0050	0.0011	0.0000	0.0000	0.0009	0.0000	0.0026	0.0012	0.0009	0.0010	0.0055	0.0000	0.0000	0.0000	0.0029	0.0012	0.0015	0.0000	0.0000	0.0016	0.0000	0.0000	0.0011	0.0020	0.0009	0.0000
OTU_658	C_Chytridiomycetes	0.0000	0.0000	0.0000	0.0000	0.0000	0.0000	0.0000	0.0011	0.0000	0.0000	0.0000	0.0108	0.0233	0.0000	0.0000	0.0632	0.0000	0.0000	0.0337	0.0238	0.0000	0.0000	0.0029	0.0030	0.0000	0.0000	0.0000	0.0010	0.0000	0.0010	0.0000	0.0000
OTU_659	O_Pezizales	0.0000	0.0000	0.0000	0.0000	0.0011	0.0019	0.0000	0.1498	0.0000	0.0000	0.0000	0.0000	0.0168	0.0049	0.0000	0.0000	0.0000	0.0000	0.0000	0.0000	0.0058	0.0000	0.1488	0.0000	0.0000	0.0000	0.0000	0.0000	0.4329	0.0285	0.0027	0.0000
OTU_660	G_Mortierella	0.0020	0.0028	0.0000	0.0013	0.0011	0.0000	0.0008	0.0043	0.0020	0.0062	0.0009	0.0000	0.0000	0.0000	0.0027	0.0031	0.0022	0.0000	0.0040	0.0000	0.0015	0.0012	0.0000	0.0045	0.0041	0.0000	0.0085	0.0038	0.0000	0.0000	0.0036	0.0000
OTU_661	D_Fungi	0.0010	0.0009	0.0000	0.0013	0.0022	0.0029	0.0025	0.0065	0.0000	0.0012	0.0000	0.0013	0.0013	0.0012	0.0009	0.0000	0.0011	0.0000	0.0013	0.0030	0.0015	0.0000	0.0029	0.0045	0.0027	0.0016	0.0017	0.0019	0.0000	0.0000	0.0018	0.0000
OTU_662	D_Fungi	0.0000	0.0009	0.0000	0.0000	0.0000	0.0010	0.0025	0.0075	0.0000	0.0000	0.0000	0.0000	0.0000	0.0012	0.0036	0.0010	0.0011	0.0010	0.0000	0.0000	0.0015	0.0012	0.0029	0.0030	0.0000	0.0000	0.0000	0.0000	0.0000	0.0000	0.0000	0.0000
OTU_663	G_Funneliformis	0.0000	0.0037	0.0000	0.0000	0.0000	0.0495	0.0042	0.0065	0.0000	0.0000	0.0000	0.0000	0.0272	0.0012	0.0000	0.0000	0.0000	0.0000	0.0000	0.0000	0.0000	0.0000	0.0000	0.0000	0.0000	0.0000	0.0000	0.0000	0.0000	0.0000	0.0000	0.0000
OTU_664	G_Cladorrhinum	0.0010	0.0000	0.0000	0.0000	0.0011	0.0000	0.0017	0.0032	0.0030	0.0000	0.0000	0.0054	0.0000	0.0000	0.0000	0.0000	0.0011	0.0000	0.0000	0.0000	0.0015	0.0000	0.0000	0.0000	0.0014	0.0016	0.0000	0.0000	0.0011	0.0000	0.0000	0.0000
OTU_665	G_Mortierella	0.0020	0.0206	0.0024	0.0000	0.0000	0.0000	0.0000	0.0000	0.0000	0.0000	0.0009	0.0000	0.0026	0.0000	0.0000	0.0602	0.0000	0.0000	0.0000	0.0000	0.0000	0.0000	0.0000	0.0000	0.0000	0.0031	0.0000	0.0010	0.0045	0.0049	0.0000	0.0019
OTU_666	D_Fungi	0.0020	0.0000	0.0012	0.0000	0.0044	0.0010	0.0017	0.0032	0.0050	0.0000	0.0000	0.0000	0.0000	0.0000	0.0009	0.0020	0.0121	0.0010	0.0013	0.0030	0.0058	0.0000	0.0131	0.0045	0.0041	0.0047	0.0000	0.0000	0.0000	0.0010	0.0009	0.0000
OTU_667	D_Fungi	0.0010	0.0000	0.0000	0.0000	0.0100	0.0000	0.0017	0.0000	0.0000	0.0000	0.0112	0.0000	0.0000	0.0000	0.0000	0.0000	0.0000	0.0000	0.0000	0.0000	0.0044	0.0000	0.0000	0.0000	0.0000	0.0016	0.0000	0.0019	0.0000	0.0039	0.0000	0.0000
OTU_668	D_Fungi	0.0208	0.0000	0.0000	0.0000	0.0000	0.0086	0.0017	0.0183	0.0190	0.0000	0.0019	0.0000	0.0013	0.0012	0.0009	0.0010	0.0011	0.0000	0.0000	0.0000	0.0000	0.0000	0.0000	0.0015	0.0014	0.0000	0.0000	0.0000	0.0000	0.0000	0.0000	0.0057
OTU_669	D_Fungi	0.0010	0.0000	0.0000	0.0000	0.0000	0.0010	0.0008	0.0011	0.0010	0.0000	0.0000	0.0000	0.0000	0.0000	0.0000	0.0010	0.0022	0.0010	0.0242	0.0000	0.0044	0.0012	0.0015	0.0090	0.0095	0.0047	0.0017	0.0010	0.0011	0.0030	0.0081	0.0076
OTU_670	G_Puccinia	0.0000	0.0000	0.0000	0.0000	0.0033	0.0000	0.0000	0.0043	0.0030	0.0000	0.0000	0.0027	0.0026	0.0000	0.0000	0.0000	0.0044	0.0000	0.0000	0.0000	0.0015	0.0074	0.0073	0.0030	0.0014	0.0047	0.0017	0.0000	0.0068	0.0000	0.0000	0.0019
OTU_671	G_Diversispora	0.0000	0.0000	0.0000	0.0000	0.0067	0.0000	0.0042	0.0022	0.0000	0.0000	0.0009	0.0000	0.0220	0.0049	0.0036	0.0010	0.0000	0.0000	0.0000	0.0000	0.0000	0.0025	0.0000	0.0000	0.0014	0.0000	0.0000	0.0000	0.0023	0.0030	0.0109	0.0000
OTU_672	F_Pleosporaceae	0.0000	0.0000	0.0000	0.0051	0.0000	0.0000	0.0000	0.0000	0.0000	0.0000	0.0093	0.0054	0.0000	0.0049	0.0099	0.0010	0.0000	0.0000	0.0256	0.0000	0.0000	0.0000	0.0000	0.0000	0.0000	0.0000	0.0017	0.0000	0.0023	0.0000	0.0000	0.0000
OTU_673	G_Archaeospora	0.0000	0.0037	0.0073	0.0139	0.0011	0.0048	0.0000	0.0000	0.0060	0.0162	0.0009	0.0013	0.0078	0.0000	0.0090	0.0020	0.0000	0.0000	0.0000	0.0000	0.0000	0.0000	0.0000	0.0000	0.0000	0.0000	0.0017	0.0010	0.0080	0.0059	0.0018	0.0000
OTU_674	O_Diversisporales	0.0228	0.0000	0.0000	0.0000	0.0011	0.0048	0.0000	0.0129	0.0100	0.0000	0.0000	0.0000	0.0013	0.0024	0.0009	0.0020	0.0011	0.0000	0.0000	0.0000	0.0000	0.0000	0.0000	0.0000	0.0000	0.0000	0.0000	0.0000	0.0000	0.0000	0.0000	0.0019
OTU_675	D_Fungi	0.0000	0.0009	0.0000	0.0000	0.0200	0.0114	0.0210	0.0011	0.0000	0.0000	0.0000	0.0000	0.0000	0.0000	0.0000	0.0000	0.0000	0.0000	0.0000	0.0000	0.0000	0.0000	0.0000	0.0000	0.0000	0.0000	0.0000	0.0000	0.0000	0.0000	0.0000	0.0000
OTU_676	G_Mortierella	0.0139	0.0000	0.0000	0.0000	0.0000	0.0000	0.0000	0.0043	0.0130	0.0000	0.0028	0.0000	0.0000	0.0000	0.0000	0.0000	0.0000	0.0000	0.0000	0.0000	0.0000	0.0000	0.0000	0.0000	0.0000	0.0047	0.0017	0.0019	0.0000	0.0000	0.0000	0.0000
OTU_677	G_Cryptococcus	0.0030	0.0187	0.0012	0.0000	0.0289	0.0029	0.0000	0.0000	0.0000	0.0000	0.0019	0.0013	0.0000	0.0012	0.0000	0.0010	0.0000	0.0000	0.0013	0.0000	0.0000	0.0000	0.0015	0.0015	0.0027	0.0016	0.0000	0.0000	0.0000	0.0000	0.0000	0.0000
OTU_678	D_Fungi	0.0000	0.0000	0.0000	0.0000	0.0000	0.0000	0.0000	0.0000	0.0020	0.0075	0.0028	0.0000	0.0026	0.0049	0.0018	0.0000	0.0000	0.0000	0.0000	0.0000	0.0000	0.0000	0.0000	0.0000	0.0027	0.0031	0.0051	0.0038	0.0023	0.0089	0.0018	0.0038
OTU_679	D_Fungi	0.0000	0.0000	0.0000	0.0000	0.0000	0.0000	0.0000	0.0000	0.0000	0.0000	0.0056	0.0013	0.0091	0.0000	0.0000	0.0061	0.0000	0.0000	0.0000	0.0000	0.0000	0.0000	0.0000	0.0000	0.0000	0.0000	0.0000	0.0000	0.0000	0.0000	0.0000	0.0000
OTU_680	D_Fungi	0.0000	0.0009	0.0000	0.0000	0.0044	0.0019	0.0000	0.0000	0.0000	0.0000	0.0000	0.0000	0.0000	0.0000	0.0000	0.0000	0.0000	0.0000	0.0067	0.0000	0.0000	0.0123	0.0000	0.0000	0.0000	0.0000	0.0000	0.0000	0.0000	0.0000	0.0000	0.0000
OTU_681	P_Basidiomycota	0.0010	0.0000	0.0000	0.0000	0.0011	0.0010	0.0025	0.0000	0.0000	0.0000	0.0000	0.0013	0.0026	0.0000	0.0018	0.0000	0.0088	0.0159	0.0175	0.0238	0.0131	0.0393	0.0963	0.0224	0.0068	0.0031	0.0000	0.0010	0.0159	0.0030	0.0018	0.0019
OTU_682	D_Fungi	0.0000	0.0009	0.0000	0.0038	0.0000	0.0000	0.0034	0.0194	0.0000	0.0012	0.0000	0.0000	0.0000	0.0000	0.0000	0.0000	0.0000	0.0010	0.0000	0.0000	0.0000	0.0000	0.0015	0.0000	0.0000	0.0000	0.0000	0.0000	0.0000	0.0000	0.0000	0.0000
OTU_683	G_Kurtzmanomyces	0.0020	0.0009	0.0036	0.0038	0.0000	0.0038	0.0059	0.0022	0.0060	0.0000	0.0000	0.0000	0.0013	0.0000	0.0000	0.0000	0.0000	0.0020	0.0000	0.0000	0.0000	0.0025	0.0044	0.0015	0.0000	0.0000	0.0000	0.0010	0.0000	0.0010	0.0009	0.0000
OTU_684	C_Sordariomycetes	0.0000	0.0009	0.0000	0.0000	0.0000	0.0000	0.0000	0.0032	0.0040	0.0000	0.0000	0.0013	0.0000	0.0000	0.0018	0.0367	0.0055	0.0000	0.0040	0.0283	0.0015	0.0000	0.0000	0.0090	0.0000	0.0016	0.0017	0.0010	0.0000	0.0010	0.0036	0.0000
OTU_685	G_Glomus	0.0000	0.0000	0.0000	0.0000	0.0011	0.0000	0.0000	0.0000	0.0000	0.0149	0.0196	0.0000	0.0000	0.0000	0.0090	0.0010	0.0000	0.0000	0.0000	0.0000	0.0000	0.0000	0.0000	0.0000	0.0014	0.0000	0.0000	0.0000	0.0000	0.0000	0.0000	0.0000
OTU_686	D_Fungi	0.0059	0.0000	0.0121	0.0013	0.0033	0.0219	0.0185	0.0097	0.0040	0.0075	0.0047	0.0000	0.0116	0.0122	0.0125	0.0041	0.0209	0.0129	0.0795	0.0417	0.0291	0.0454	0.0656	0.0553	0.0068	0.0125	0.0119	0.0048	0.0091	0.0118	0.0072	0.0076
OTU_687	G_Glomus	0.0000	0.0000	0.0000	0.0000	0.0000	0.0029	0.0000	0.0000	0.0000	0.0000	0.0000	0.0000	0.0466	0.0000	0.0009	0.0143	0.0000	0.0000	0.0000	0.0000	0.0000	0.0000	0.0000	0.0000	0.0000	0.0000	0.0000	0.0000	0.0000	0.0000	0.0000	0.0000
OTU_688	C_Sordariomycetes	0.0000	0.0000	0.0000	0.0000	0.0000	0.0000	0.0000	0.0000	0.0010	0.0000	0.0000	0.0000	0.0194	0.0122	0.0036	0.0000	0.0000	0.0000	0.0000	0.0000	0.0000	0.0000	0.0000	0.0000	0.0014	0.0000	0.0000	0.0000	0.0000	0.0020	0.0000	0.0000
OTU_689	D_Fungi	0.0040	0.0009	0.0048	0.0000	0.0022	0.0010	0.0042	0.0011	0.0120	0.0099	0.0093	0.0054	0.0026	0.0000	0.0009	0.0041	0.0110	0.0030	0.0013	0.0045	0.0029	0.0074	0.0044	0.0000	0.0095	0.0078	0.0017	0.0067	0.0023	0.0089	0.0045	0.0076
OTU_690	D_Fungi	0.0000	0.0000	0.0000	0.0000	0.0000	0.0000	0.0000	0.0000	0.0000	0.0000	0.0000	0.0000	0.0052	0.0012	0.0045	0.0000	0.0000	0.0000	0.0000	0.0000	0.0000	0.0061	0.0000	0.0000	0.0095	0.0000	0.0000	0.0000	0.0000	0.0000	0.0000	0.0000
OTU_691	G_Glomus	0.0000	0.0000	0.0000	0.0000	0.0000	0.0048	0.0000	0.0000	0.0000	0.0025	0.0569	0.0000	0.0983	0.0024	0.0009	0.0479	0.0000	0.0000	0.0000	0.0000	0.0015	0.0000	0.0000	0.0000	0.0000	0.0000	0.0000	0.0000	0.0000	0.0000	0.0000	0.0000
OTU_692	G_Verticillium	0.0030	0.0000	0.0000	0.0038	0.0011	0.0000	0.0000	0.0011	0.0000	0.0000	0.0000	0.0054	0.0013	0.0012	0.0000	0.0000	0.0033	0.0010	0.0108	0.0104	0.0044	0.0025	0.0058	0.0120	0.0000	0.0000	0.0017	0.0048	0.0000	0.0000	0.0000	0.0000
OTU_693	G_Coprinellus	0.0000	0.0009	0.0000	0.0000	0.0011	0.0000	0.0000	0.0000	0.0000	0.0000	0.0270	0.0000	0.0026	0.0268	0.0108	0.0173	0.0000	0.0000	0.0000	0.0000	0.0000	0.0012	0.0058	0.0030	0.0150	0.0000	0.0000	0.0000	0.0000	0.0522	0.0561	0.0019
OTU_694	C_Glomeromycetes	0.0000	0.0000	0.0000	0.0000	0.0000	0.0000	0.0000	0.0000	0.0000	0.0000	0.0000	0.0000	0.0104	0.0037	0.0000	0.0031	0.0000	0.0000	0.0000	0.0000	0.0000	0.0000	0.0000	0.0000	0.0068	0.0000	0.0017	0.0000	0.0227	0.0000	0.0000	0.0000
OTU_695	D_Fungi	0.0030	0.0009	0.0000	0.0013	0.0011	0.0019	0.0000	0.0054	0.0000	0.0000	0.0019	0.0000	0.0000	0.0012	0.0000	0.0020	0.0011	0.0000	0.0000	0.0015	0.0000	0.0000	0.0015	0.0015	0.0000	0.0000	0.0000	0.0000	0.0011	0.0000	0.0009	0.0000
OTU_696	D_Fungi	0.0218	0.0197	0.0036	0.0101	0.0033	0.0162	0.0160	0.0313	0.1070	0.0646	0.0009	0.0027	0.0026	0.0012	0.0000	0.0010	0.0110	0.0169	0.0013	0.0000	0.0102	0.1228	0.0408	0.0882	0.0027	0.0078	0.0085	0.0000	0.0034	0.0010	0.0000	0.0019
OTU_697	G_Hydnomerulius	0.0000	0.0000	0.0000	0.0000	0.0111	0.0076	0.0034	0.0507	0.0000	0.0000	0.0000	0.0000	0.0000	0.0000	0.0000	0.0000	0.0000	0.0000	0.0000	0.0000	0.0000	0.0000	0.0000	0.0000	0.0000	0.0000	0.0000	0.0000	0.0000	0.0000	0.0000	0.0000
OTU_698	D_Fungi	0.0020	0.0000	0.0061	0.0000	0.0000	0.0019	0.0000	0.0022	0.0000	0.0000	0.0000	0.0000	0.0013	0.0037	0.0009	0.0092	0.0099	0.0000	0.0054	0.0030	0.0029	0.0000	0.0029	0.0015	0.0014	0.0016	0.0000	0.0019	0.0091	0.0030	0.0109	0.0095
OTU_699	G_Schizothecium	0.0000	0.0009	0.0000	0.0063	0.0000	0.0019	0.0000	0.0000	0.0010	0.0000	0.0000	0.0054	0.0000	0.0000	0.0000	0.0000	0.0000	0.0000	0.0000	0.0283	0.0015	0.0000	0.0000	0.0479	0.0014	0.0000	0.0000	0.0000	0.0000	0.0020	0.0000	0.0000
OTU_700	G_Claroideoglomus	0.0000	0.0000	0.0000	0.0000	0.0178	0.0190	0.0109	0.0453	0.0000	0.0000	0.0000	0.0000	0.0039	0.0000	0.0125	0.0010	0.0000	0.0000	0.0000	0.0000	0.0102	0.0172	0.0058	0.0075	0.0000	0.0016	0.0034	0.0000	0.0000	0.0000	0.0000	0.0114
OTU_701	D_Fungi	0.0010	0.0028	0.0000	0.0025	0.0000	0.0000	0.0000	0.0011	0.0000	0.0000	0.0000	0.0054	0.0026	0.0000	0.0000	0.0010	0.0011	0.0000	0.0054	0.0119	0.0000	0.0000	0.0000	0.0045	0.0000	0.0000	0.0068	0.0010	0.0000	0.0010	0.0000	0.0038
OTU_702	O_Xylariales	0.0020	0.0000	0.0000	0.0025	0.0011	0.0000	0.0050	0.0000	0.0030	0.0012	0.0028	0.0000	0.0000	0.0024	0.0000	0.0000	0.0011	0.0020	0.0000	0.0000	0.0000	0.0012	0.0000	0.0000	0.0027	0.0000	0.0034	0.0057	0.0011	0.0069	0.0009	0.0000
OTU_703	D_Fungi	0.0050	0.0028	0.0157	0.0000	0.0000	0.0000	0.0000	0.0011	0.0000	0.0000	0.0000	0.0000	0.0013	0.0000	0.0134	0.0010	0.0110	0.0010	0.0000	0.0000	0.0204	0.0012	0.0058	0.0000	0.0041	0.0031	0.0017	0.0019	0.0034	0.0059	0.0063	0.0057
OTU_704	G_Glomus	0.0000	0.0000	0.0012	0.0000	0.0056	0.0000	0.0000	0.0011	0.0000	0.0199	0.0140	0.0000	0.0000	0.0000	0.0081	0.0010	0.0000	0.0000	0.0000	0.0000	0.0000	0.0000	0.0000	0.0000	0.0014	0.0000	0.0000	0.0000	0.0102	0.0030	0.0000	0.0038
OTU_705	D_Fungi	0.0000	0.0028	0.0000	0.0114	0.0000	0.0000	0.0000	0.0022	0.0020	0.0000	0.0000	0.0040	0.0000	0.0000	0.0000	0.0000	0.0000	0.0060	0.0215	0.0566	0.0000	0.0000	0.0015	0.4800	0.0000	0.0000	0.0017	0.0000	0.0011	0.0551	0.0091	0.0000
OTU_706	D_Fungi	0.0159	0.0075	0.0000	0.0000	0.0478	0.0171	0.0067	0.0032	0.0050	0.0025	0.0420	0.0000	0.0336	0.0037	0.0565	0.0031	0.0011	0.0000	0.0000	0.0000	0.0000	0.0000	0.0000	0.0000	0.0014	0.0000	0.0017	0.0000	0.0102	0.0049	0.0036	0.0000
OTU_707	D_Fungi	0.0040	0.0000	0.0000	0.0013	0.0000	0.0000	0.0000	0.0000	0.0010	0.0012	0.0019	0.0000	0.0129	0.0037	0.0000	0.0000	0.0033	0.0010	0.0000	0.0000	0.0000	0.0012	0.0000	0.0000	0.0054	0.0016	0.0000	0.0000	0.0000	0.0118	0.0009	0.0493
OTU_708	O_Pleosporales	0.0000	0.0000	0.0000	0.0000	0.0000	0.0000	0.0000	0.0000	0.0000	0.0000	0.0009	0.0000	0.0582	0.0098	0.0627	0.0000	0.0000	0.0000	0.0000	0.0000	0.0000	0.0000	0.0000	0.0000	0.0109	0.0094	0.0000	0.0000	0.0080	0.0049	0.0308	0.0171
OTU_709	D_Fungi	0.0000	0.0019	0.0097	0.0063	0.0000	0.0000	0.0008	0.0011	0.0020	0.0012	0.0009	0.0013	0.0065	0.0037	0.0009	0.0010	0.0000	0.0000	0.0000	0.0000	0.0000	0.0012	0.0015	0.0000	0.0014	0.0031	0.0000	0.0019	0.0011	0.0030	0.0000	0.0000
OTU_710	G_Acremonium	0.0000	0.0103	0.0000	0.0038	0.0000	0.0000	0.0000	0.0000	0.0000	0.0000	0.0000	0.0094	0.0013	0.0000	0.0000	0.0000	0.0000	0.0010	0.0000	0.0015	0.0000	0.0000	0.0000	0.0060	0.0000	0.0000	0.0000	0.0000	0.0000	0.0010	0.0000	0.0000
OTU_711	D_Fungi	0.0139	0.0009	0.0012	0.0000	0.0011	0.0048	0.0000	0.0032	0.0000	0.0000	0.0000	0.0000	0.0000	0.0000	0.0000	0.0000	0.0011	0.0000	0.0013	0.0119	0.0000	0.0000	0.0000	0.0000	0.0014	0.0000	0.0017	0.0038	0.0000	0.0000	0.0000	0.0000
OTU_712	D_Fungi	0.0000	0.0000	0.0000	0.0000	0.0000	0.0000	0.0008	0.0011	0.0000	0.0037	0.0028	0.0000	0.0000	0.0012	0.0009	0.0000	0.0000	0.0000	0.0000	0.0000	0.0000	0.0049	0.0000	0.0000	0.0014	0.0000	0.0000	0.0000	0.0011	0.0030	0.0000	0.0000
OTU_713	G_Pichia	0.0000	0.0000	0.0000	0.0000	0.0022	0.0105	0.0008	0.0000	0.0000	0.0000	0.0000	0.0013	0.0000	0.0049	0.0018	0.0000	0.0000	0.0000	0.0000	0.0000	0.0000	0.0000	0.0000	0.0000	0.0000	0.0000	0.0000	0.0000	0.0000	0.0000	0.0000	0.0000
OTU_714	D_Fungi	0.0069	0.0000	0.0000	0.0000	0.0011	0.0010	0.0025	0.0022	0.0040	0.0000	0.0000	0.0000	0.0000	0.0012	0.0000	0.0000	0.0110	0.0000	0.0000	0.0000	0.0000	0.0000	0.0000	0.0015	0.0000	0.0000	0.0000	0.0000	0.0000	0.0000	0.0000	0.0000
OTU_715	D_Fungi	0.0000	0.0000	0.0000	0.0000	0.0011	0.0048	0.0168	0.0054	0.0000	0.0000	0.0000	0.0000	0.0000	0.0037	0.0000	0.0000	0.0011	0.0000	0.0027	0.0000	0.0000	0.0000	0.0044	0.0015	0.0014	0.0000	0.0000	0.0000	0.0034	0.0000	0.0000	0.0000
OTU_716	D_Fungi	0.0000	0.0000	0.0000	0.0000	0.0011	0.0000	0.0000	0.0011	0.0140	0.0062	0.0009	0.0000	0.0039	0.0012	0.0341	0.0000	0.0000	0.0000	0.0000	0.0000	0.0000	0.0000	0.0000	0.0000	0.0000	0.0000	0.0000	0.0000	0.0000	0.0010	0.0027	0.0000
OTU_717	D_Fungi	0.0010	0.0000	0.0000	0.0051	0.0000	0.0000	0.0000	0.0022	0.0010	0.0000	0.0000	0.0108	0.0000	0.0000	0.0009	0.0010	0.0000	0.0010	0.0054	0.0238	0.0000	0.0025	0.0000	0.0060	0.0000	0.0000	0.0034	0.0010	0.0000	0.0010	0.0018	0.0000
OTU_718	D_Fungi	0.0050	0.0000	0.0024	0.0025	0.0033	0.0048	0.0008	0.0011	0.0060	0.0000	0.0009	0.0000	0.0026	0.0012	0.0027	0.0010	0.0055	0.0010	0.0013	0.0000	0.0000	0.0012	0.0000	0.0000	0.0000	0.0016	0.0000	0.0000	0.0011	0.0059	0.0018	0.0057
OTU_719	O_Hypocreales	0.0010	0.0019	0.0000	0.0368	0.0000	0.0010	0.0008	0.0000	0.0000	0.0012	0.0000	0.0094	0.0000	0.0012	0.0000	0.0000	0.0000	0.0000	0.0013	0.0060	0.0000	0.0000	0.0000	0.0000	0.0000	0.0000	0.0017	0.0010	0.0000	0.0000	0.0000	0.0000
OTU_720	G_Pyrenochaeta	0.0000	0.0009	0.0000	0.0000	0.0000	0.0038	0.0008	0.0065	0.0020	0.0000	0.0000	0.0000	0.0026	0.0000	0.0018	0.0000	0.0000	0.0000	0.0000	0.0000	0.0000	0.0025	0.0015	0.0000	0.0000	0.0000	0.0000	0.0000	0.0000	0.0000	0.0000	0.0000
OTU_721	F_Sporormiaceae	0.0000	0.0000	0.0000	0.0000	0.0000	0.0000	0.0000	0.0000	0.0010	0.0000	0.0187	0.0040	0.0000	0.0012	0.0009	0.0041	0.0000	0.0000	0.0000	0.0000	0.0000	0.0000	0.0000	0.0000	0.0014	0.0000	0.0000	0.0019	0.0000	0.0000	0.0000	0.0000
OTU_722	D_Fungi	0.0000	0.0000	0.0000	0.0000	0.0000	0.0000	0.0000	0.0000	0.0000	0.0000	0.0000	0.0027	0.0000	0.0000	0.0036	0.0041	0.0000	0.0000	0.0000	0.0000	0.0000	0.0000	0.0000	0.0000	0.0000	0.0000	0.0000	0.0000	0.0000	0.0000	0.0000	0.0000
OTU_723	D_Fungi	0.0030	0.0009	0.0000	0.0000	0.0000	0.0000	0.0008	0.0011	0.0020	0.0062	0.0037	0.0000	0.0039	0.0024	0.0018	0.0051	0.0022	0.0000	0.0000	0.0000	0.0000	0.0000	0.0000	0.0000	0.0000	0.0000	0.0000	0.0000	0.0011	0.0000	0.0009	0.0000
OTU_724	P_Ascomycota	0.0050	0.0028	0.0303	0.0000	0.0011	0.0000	0.0345	0.0000	0.0000	0.0932	0.0000	0.0013	0.0000	0.0085	0.0000	0.0010	0.0121	0.0000	0.0000	0.0000	0.0015	0.0000	0.0058	0.0000	0.0000	0.0000	0.0000	0.0000	0.0000	0.0000	0.0000	0.0019
OTU_725	P_Ascomycota	0.0010	0.0019	0.0036	0.0000	0.0100	0.0010	0.0000	0.0000	0.0100	0.0012	0.0019	0.0040	0.0026	0.0024	0.0009	0.0061	0.0231	0.0279	0.0552	0.0015	0.0116	0.0025	0.0000	0.0000	0.0027	0.0031	0.0000	0.0057	0.0125	0.0020	0.0027	0.0076
OTU_726	P_Ascomycota	0.0000	0.0000	0.0000	0.0000	0.0000	0.0000	0.0000	0.0000	0.0000	0.0062	0.0028	0.0013	0.0026	0.0000	0.0000	0.0000	0.0000	0.0000	0.0000	0.0000	0.0000	0.0000	0.0000	0.0000	0.0000	0.0000	0.0000	0.0000	0.0000	0.0000	0.0000	0.0000
OTU_727	G_Dokmaia	0.0059	0.0000	0.0012	0.0000	0.0000	0.3235	0.0000	0.0000	0.0040	0.0050	0.0047	0.0000	0.0311	0.0061	0.0000	0.0000	0.0011	0.0000	0.0121	0.0045	0.0000	0.0012	0.0015	0.0030	0.0000	0.0016	0.0051	0.0057	0.0000	0.0000	0.0009	0.0000
OTU_728	G_Entrophospora	0.0000	0.0009	0.0000	0.0000	0.0111	0.0057	0.0017	0.0000	0.0000	0.0000	0.0000	0.0013	0.0000	0.0000	0.0000	0.0000	0.0000	0.0000	0.0027	0.0000	0.0000	0.0000	0.0015	0.0030	0.0000	0.0000	0.0000	0.0000	0.0000	0.0000	0.0000	0.0000
OTU_729	D_Fungi	0.0000	0.0000	0.0000	0.0000	0.0000	0.0000	0.0000	0.0000	0.0000	0.0000	0.0037	0.0000	0.0000	0.0000	0.0000	0.0041	0.0000	0.0000	0.0000	0.0000	0.0000	0.0037	0.0000	0.0000	0.0000	0.0000	0.0000	0.0000	0.0011	0.0000	0.0000	0.0000
OTU_730	D_Fungi	0.0169	0.0056	0.0133	0.0076	0.0056	0.0181	0.0118	0.0140	0.0220	0.0186	0.0187	0.0067	0.0220	0.0183	0.0170	0.0112	0.0176	0.0100	0.0215	0.0119	0.0233	0.0074	0.0263	0.0150	0.0217	0.0188	0.0203	0.0134	0.0409	0.0187	0.0136	0.0247
OTU_731	D_Fungi	0.0000	0.0000	0.0024	0.0000	0.0033	0.0000	0.0000	0.0000	0.0000	0.0000	0.0000	0.0000	0.0000	0.0012	0.0000	0.0000	0.0022	0.0000	0.0000	0.0000	0.0015	0.0221	0.0015	0.0000	0.0014	0.0047	0.0000	0.0010	0.0102	0.0000	0.0018	0.0000
OTU_732	G_Glomus	0.0000	0.0000	0.0291	0.0013	0.0000	0.0000	0.0143	0.0032	0.0000	0.0012	0.0000	0.0000	0.0272	0.0134	0.0009	0.0510	0.0000	0.0000	0.0000	0.0000	0.0000	0.0000	0.0000	0.0000	0.0000	0.0000	0.0000	0.0000	0.0057	0.0000	0.0000	0.0000
OTU_733	G_Leptosphaerulina	0.0000	0.0019	0.0000	0.0000	0.0000	0.0048	0.0000	0.0000	0.0030	0.0062	0.0009	0.0000	0.0000	0.0012	0.0000	0.0000	0.0000	0.0000	0.0000	0.0000	0.0029	0.0000	0.0000	0.0000	0.0000	0.0000	0.0051	0.0000	0.0023	0.0000	0.0000	0.0000
OTU_734	C_Glomeromycetes	0.0000	0.0000	0.0000	0.0013	0.0156	0.0038	0.0194	0.0269	0.0040	0.0087	0.0093	0.0013	0.0013	0.0024	0.0117	0.0153	0.0000	0.0000	0.0000	0.0000	0.0029	0.0086	0.0044	0.0060	0.0000	0.0000	0.0034	0.0105	0.0068	0.0128	0.0036	0.0114
OTU_735	O_Pleosporales	0.0010	0.0000	0.0012	0.0000	0.0022	0.0057	0.0379	0.0000	0.0000	0.0000	0.0000	0.0000	0.0000	0.0000	0.0063	0.0000	0.0000	0.0000	0.0000	0.0000	0.0000	0.0000	0.0000	0.0000	0.0000	0.0000	0.0000	0.0000	0.0000	0.0000	0.0000	0.0000
OTU_736	P_Ascomycota	0.0000	0.0000	0.0000	0.0038	0.0033	0.0000	0.0000	0.0000	0.0000	0.0037	0.0000	0.0000	0.0026	0.0000	0.0000	0.0000	0.0000	0.0000	0.0000	0.0000	0.0000	0.0000	0.0000	0.0000	0.0000	0.0000	0.0000	0.0000	0.0000	0.0000	0.0027	0.0000
OTU_737	D_Fungi	0.0010	0.0019	0.0000	0.0013	0.0000	0.0000	0.0008	0.0000	0.0040	0.0000	0.0019	0.0000	0.0013	0.0037	0.0009	0.0010	0.0044	0.0020	0.0027	0.0030	0.0015	0.0012	0.0000	0.0030	0.0027	0.0000	0.0000	0.0000	0.0011	0.0000	0.0036	0.0000
OTU_738	F_Diversisporaceae	0.1338	0.1818	0.0000	0.0025	0.0000	0.0000	0.0000	0.0022	0.0020	0.0000	0.0196	0.0000	0.0026	0.0000	0.0000	0.0000	0.0000	0.0000	0.0000	0.0000	0.0000	0.0000	0.0000	0.0000	0.0000	0.0000	0.0000	0.0000	0.0000	0.0000	0.0081	0.0000
OTU_739	D_Fungi	0.0020	0.0047	0.0024	0.0038	0.0000	0.0038	0.0008	0.0011	0.0160	0.0000	0.0019	0.0000	0.0000	0.0000	0.0009	0.0000	0.0022	0.0010	0.0000	0.0000	0.0000	0.0000	0.0000	0.0000	0.0000	0.0000	0.0000	0.0000	0.0000	0.0000	0.0000	0.0000
OTU_740	D_Fungi	0.0079	0.0009	0.0024	0.0013	0.0000	0.0000	0.0050	0.0000	0.0040	0.0000	0.0009	0.0013	0.0013	0.0012	0.0018	0.0000	0.0011	0.0000	0.0000	0.0000	0.0000	0.0000	0.0015	0.0000	0.0000	0.0031	0.0000	0.0019	0.0011	0.0030	0.0018	0.0000
OTU_741	D_Fungi	0.0040	0.0037	0.0012	0.0051	0.0056	0.0029	0.0076	0.0000	0.0000	0.0000	0.0000	0.0000	0.0000	0.0000	0.0000	0.0000	0.0077	0.0010	0.0000	0.0000	0.0044	0.0061	0.0000	0.0000	0.0014	0.0000	0.0017	0.0010	0.0000	0.0039	0.0018	0.0019
OTU_742	G_Spizellomyces	0.0020	0.0000	0.0012	0.0558	0.0000	0.0000	0.0000	0.0011	0.0000	0.0000	0.0000	0.0000	0.0000	0.0012	0.0027	0.0051	0.0033	0.0010	0.0000	0.0030	0.0029	0.0074	0.0058	0.0015	0.0027	0.0000	0.0000	0.0000	0.0011	0.0000	0.0000	0.0019
OTU_743	G_Sporobolomyces	0.0000	0.0000	0.0036	0.0025	0.0000	0.0000	0.0000	0.0000	0.0000	0.0000	0.0121	0.0000	0.0013	0.0000	0.0000	0.0000	0.0000	0.0000	0.0000	0.0000	0.0000	0.0000	0.0000	0.0000	0.0000	0.0000	0.0000	0.0000	0.0000	0.0000	0.0000	0.0000
OTU_744	P_Ascomycota	0.0000	0.0000	0.1405	0.0000	0.0011	0.0000	0.0042	0.0065	0.0010	0.0000	0.0075	0.0000	0.0026	0.0012	0.0000	0.1132	0.0000	0.0378	0.0000	0.0000	0.0029	0.0258	0.0000	0.0000	0.0014	0.0000	0.0000	0.0382	0.0045	0.0030	0.0380	0.0000
OTU_745	G_Pezizella	0.0000	0.0000	0.0000	0.0000	0.0011	0.0000	0.0025	0.0086	0.0000	0.0000	0.0000	0.0000	0.0013	0.0000	0.0000	0.0000	0.0176	0.0040	0.0417	0.0253	0.0029	0.0000	0.0656	0.0449	0.0095	0.0063	0.0170	0.0248	0.0034	0.0049	0.0091	0.0095
OTU_746	G_Glomus	0.0347	0.0000	0.0000	0.0000	0.0100	0.0029	0.0000	0.0043	0.0050	0.0249	0.0420	0.0323	0.0272	0.0256	0.0251	0.0653	0.0000	0.0000	0.0000	0.0000	0.0000	0.0000	0.0000	0.0000	0.0027	0.0000	0.0000	0.0000	0.0182	0.0000	0.0109	0.0000
OTU_747	G_Udeniomyces	0.0000	0.0000	0.0000	0.0000	0.0000	0.0000	0.0000	0.0000	0.0000	0.0000	0.0000	0.0054	0.0000	0.0000	0.0027	0.0000	0.0000	0.0000	0.0000	0.0000	0.0029	0.0098	0.0000	0.0000	0.0027	0.0000	0.0000	0.0010	0.0000	0.0000	0.0000	0.0000
OTU_748	D_Fungi	0.0030	0.0000	0.0000	0.0000	0.0022	0.0010	0.0034	0.0032	0.0060	0.0025	0.0009	0.0000	0.0000	0.0012	0.0000	0.0020	0.0066	0.0010	0.0013	0.0030	0.0000	0.0000	0.0058	0.0015	0.0014	0.0000	0.0000	0.0000	0.0000	0.0030	0.0045	0.0019
OTU_749	D_Fungi	0.0000	0.0000	0.0000	0.0000	0.0000	0.0000	0.0000	0.0000	0.0070	0.0037	0.0009	0.0309	0.0039	0.0012	0.0000	0.0010	0.0000	0.0000	0.0000	0.0000	0.0000	0.0000	0.0029	0.0015	0.0027	0.0000	0.0000	0.0029	0.0080	0.0000	0.0000	0.0019
OTU_750	G_Tricharina	0.0000	0.0000	0.0000	0.0000	0.0000	0.0000	0.0059	0.0000	0.0000	0.0000	0.0009	0.0013	0.0000	0.0000	0.0323	0.0000	0.0000	0.0000	0.0000	0.0000	0.0000	0.0000	0.0000	0.0000	0.0000	0.0000	0.0000	0.0000	0.0000	0.0000	0.0000	0.0000
OTU_751	D_Fungi	0.0000	0.0000	0.0048	0.0013	0.0000	0.0000	0.0034	0.0000	0.0000	0.0000	0.0000	0.0000	0.0000	0.0000	0.0000	0.0000	0.0000	0.0000	0.0000	0.0000	0.0000	0.0000	0.0000	0.0000	0.0000	0.0031	0.0017	0.0000	0.0000	0.0010	0.0000	0.0000
OTU_752	D_Fungi	0.0000	0.0000	0.0036	0.0000	0.0011	0.0000	0.0050	0.0000	0.0000	0.0000	0.0000	0.0040	0.0013	0.0000	0.0000	0.0010	0.0044	0.0030	0.0081	0.0328	0.0000	0.0061	0.0000	0.0105	0.0000	0.0000	0.0000	0.0000	0.0034	0.0000	0.0000	0.0038
OTU_753	G_Claroideoglomus	0.0000	0.0000	0.0000	0.0000	0.0100	0.0181	0.0286	0.0226	0.0000	0.0062	0.0000	0.0000	0.0000	0.0012	0.0000	0.0000	0.0000	0.0000	0.0000	0.0000	0.0058	0.0098	0.0015	0.0000	0.0014	0.0000	0.0017	0.0000	0.0000	0.0010	0.0000	0.0038
OTU_754	D_Fungi	0.0000	0.0000	0.0000	0.0000	0.0000	0.0010	0.0000	0.0000	0.0010	0.0000	0.0000	0.0108	0.0052	0.0024	0.0000	0.0020	0.0000	0.0000	0.0000	0.0000	0.0044	0.0000	0.0000	0.0000	0.0000	0.0063	0.0000	0.0010	0.0000	0.0000	0.0000	0.0000
OTU_755	D_Fungi	0.0020	0.0000	0.0012	0.0000	0.0000	0.0000	0.0000	0.0000	0.0000	0.0000	0.0000	0.0000	0.0000	0.0000	0.0000	0.0000	0.0000	0.0030	0.0081	0.0119	0.0000	0.0000	0.0131	0.0060	0.0095	0.0016	0.0017	0.0000	0.0000	0.0000	0.0009	0.0038
OTU_756	G_Mortierella	0.0000	0.0000	0.0000	0.0000	0.0000	0.0086	0.0008	0.0000	0.0000	0.0000	0.0000	0.0000	0.0000	0.0000	0.0000	0.0000	0.0000	0.0000	0.0000	0.6015	0.0015	0.0025	0.0000	0.1092	0.0000	0.0000	0.0000	0.0010	0.0000	0.0000	0.0000	0.0000
OTU_757	P_Ascomycota	0.0000	0.0019	0.0000	0.0013	0.0011	0.0010	0.0034	0.0000	0.0000	0.0037	0.0000	0.0000	0.0013	0.0012	0.0009	0.0010	0.0022	0.0000	0.0000	0.0030	0.0029	0.0025	0.0000	0.0000	0.0000	0.0016	0.0051	0.0000	0.0000	0.0020	0.0018	0.0019
OTU_758	O_Sordariales	0.0000	0.0047	0.0000	0.0000	0.0000	0.0000	0.0000	0.0022	0.0000	0.0000	0.0000	0.0000	0.0013	0.0000	0.0000	0.0000	0.1098	0.0090	0.0040	0.0015	0.0218	0.0111	0.0029	0.0000	0.0027	0.0000	0.0034	0.0468	0.0045	0.0167	0.0380	0.0019
OTU_759	P_Ascomycota	0.0000	0.0000	0.0000	0.0013	0.0000	0.0000	0.0000	0.0000	0.0020	0.0000	0.0000	0.0040	0.0000	0.0000	0.0009	0.0000	0.0000	0.0000	0.0000	0.0000	0.0000	0.0000	0.0000	0.0015	0.0014	0.0000	0.0017	0.0000	0.0023	0.0000	0.0000	0.0000
OTU_760	D_Fungi	0.0010	0.0019	0.0000	0.0000	0.0000	0.0000	0.0042	0.0000	0.0000	0.0000	0.0000	0.0000	0.0000	0.0000	0.0000	0.0000	0.0000	0.0000	0.0000	0.0000	0.0000	0.0000	0.0000	0.0000	0.0000	0.0000	0.0017	0.0076	0.0000	0.0000	0.0000	0.0000
OTU_761	D_Fungi	0.0000	0.0000	0.0000	0.0000	0.0000	0.0000	0.0000	0.0000	0.0190	0.0000	0.0000	0.0081	0.0065	0.0000	0.0000	0.0041	0.0000	0.0010	0.0000	0.0000	0.0000	0.0000	0.0000	0.0000	0.0000	0.0000	0.0000	0.0000	0.0000	0.0089	0.0009	0.0019
OTU_762	D_Fungi	0.0000	0.0000	0.0000	0.0000	0.0011	0.0019	0.0034	0.0000	0.0000	0.0000	0.0000	0.0000	0.0000	0.0000	0.0027	0.0000	0.0000	0.0000	0.0000	0.0000	0.0000	0.0000	0.0000	0.0000	0.0000	0.0000	0.0000	0.0000	0.0000	0.0000	0.0091	0.0000
OTU_763	D_Fungi	0.0000	0.0000	0.0000	0.0000	0.0000	0.0000	0.0000	0.0011	0.0280	0.0025	0.0009	0.0013	0.0026	0.0000	0.0009	0.0000	0.0000	0.0000	0.0000	0.0000	0.0000	0.0000	0.0000	0.0030	0.0014	0.0000	0.0000	0.0000	0.0000	0.0000	0.0000	0.0000
OTU_764	P_Basidiomycota	0.0000	0.0000	0.0000	0.0000	0.0000	0.0000	0.0000	0.0000	0.0000	0.0000	0.0000	0.0040	0.0039	0.0000	0.0000	0.0000	0.0000	0.0000	0.0000	0.0000	0.0000	0.0000	0.0000	0.0000	0.0000	0.0000	0.0000	0.0000	0.0000	0.0000	0.0000	0.0000
OTU_765	C_Sordariomycetes	0.0000	0.0009	0.0000	0.0051	0.0000	0.0000	0.0000	0.0000	0.0000	0.0000	0.0009	0.0027	0.0000	0.0000	0.0000	0.0000	0.0000	0.0000	0.0000	0.0030	0.0000	0.0000	0.0000	0.0538	0.0000	0.0000	0.0000	0.0000	0.0000	0.0502	0.0000	0.0000
OTU_766	G_Claroideoglomus	0.0000	0.0000	0.0000	0.0000	0.0011	0.0000	0.0109	0.0237	0.0000	0.0000	0.0000	0.0000	0.0013	0.0000	0.0000	0.0000	0.0000	0.0000	0.0000	0.0000	0.0000	0.0000	0.0000	0.0000	0.0000	0.0000	0.0000	0.0000	0.0000	0.0000	0.0000	0.0000
OTU_767	D_Fungi	0.0000	0.0000	0.0000	0.0000	0.0000	0.0000	0.0000	0.0000	0.0000	0.0087	0.0000	0.0013	0.0000	0.0000	0.0000	0.0020	0.0000	0.0000	0.0000	0.0000	0.0000	0.0000	0.0000	0.0000	0.0000	0.0000	0.0000	0.0000	0.0000	0.0000	0.0000	0.0000
OTU_768	F_Thelebolaceae	0.0010	0.0019	0.0000	0.0076	0.0000	0.0000	0.0000	0.0000	0.0000	0.0025	0.0009	0.0000	0.0000	0.0000	0.0000	0.0000	0.0000	0.0010	0.0000	0.3365	0.0683	0.0000	0.0000	0.0015	0.0000	6.9327	0.0102	0.0038	0.0034	0.0049	0.0054	0.0095
OTU_769	D_Fungi	0.0000	0.0000	0.0000	0.0000	0.0000	0.0000	0.0000	0.0000	0.0000	0.0000	0.0000	0.0000	0.0000	0.0000	0.0000	0.0000	0.0000	0.0000	0.0000	0.0000	0.0000	0.0000	0.0000	0.0000	0.0258	0.0000	0.0797	0.0315	0.0000	0.0000	0.0000	0.0702
OTU_770	D_Fungi	0.0030	0.0009	0.0000	0.0051	0.0022	0.0019	0.0008	0.0000	0.0090	0.0000	0.0000	0.0000	0.0000	0.0024	0.0000	0.0000	0.0011	0.0000	0.0000	0.0000	0.0000	0.0000	0.0000	0.0000	0.0054	0.0016	0.0000	0.0000	0.0000	0.0000	0.0018	0.0000
OTU_771	D_Fungi	0.0000	0.0000	0.0000	0.0000	0.0000	0.0000	0.0008	0.0000	0.0000	0.0000	0.0000	0.0000	0.0000	0.0000	0.0000	0.0031	0.0077	0.0010	0.0215	0.0060	0.0015	0.0037	0.0000	0.0075	0.0000	0.0031	0.0000	0.0000	0.0000	0.0000	0.0000	0.0019
OTU_772	D_Fungi	0.0000	0.0000	0.0000	0.0000	0.0189	0.0029	0.0008	0.0011	0.0000	0.0000	0.0000	0.0000	0.0000	0.0000	0.0000	0.0000	0.0000	0.0000	0.0000	0.0000	0.0000	0.0000	0.0000	0.0000	0.0000	0.0000	0.0000	0.0000	0.0000	0.0000	0.0000	0.0000
OTU_773	C_Agaricomycetes	0.0000	0.0000	0.0000	0.0000	0.0033	0.0000	0.0000	0.0000	0.0000	0.0000	0.0000	0.0000	0.0026	0.0061	0.0000	0.0010	0.0000	0.0000	0.0000	0.0000	0.0000	0.0049	0.0015	0.0030	0.0000	0.0000	0.0000	0.0000	0.0000	0.0207	0.0000	0.0000
OTU_774	C_Sordariomycetes	0.0000	0.0000	0.0000	0.0000	0.0000	0.0010	0.0177	0.0000	0.0000	0.0000	0.0009	0.0013	0.0000	0.0586	0.0000	0.0000	0.0099	0.0000	0.0000	0.0000	0.0102	0.0025	0.0102	0.0000	0.0000	0.0000	0.0000	0.0000	0.0000	0.0000	0.0000	0.0000
OTU_775	C_Sordariomycetes	0.0000	0.0000	0.0000	0.0000	0.0000	0.0000	0.1859	0.0000	0.0000	0.0000	0.0000	0.0000	0.0000	0.0000	0.0045	0.0000	0.0000	0.0000	0.0000	0.0000	0.0015	0.0000	0.0000	0.0000	0.0000	0.0000	0.0000	0.0000	0.0023	0.0000	0.0000	0.0000
OTU_776	D_Fungi	0.0000	0.0000	0.0024	0.0000	0.0089	0.0000	0.0050	0.0000	0.0000	0.0000	0.0000	0.0000	0.0000	0.0000	0.0000	0.0000	0.0022	0.0000	0.0000	0.0000	0.0000	0.0012	0.0015	0.0000	0.0000	0.0000	0.0000	0.0000	0.0000	0.0000	0.0009	0.0000
OTU_777	D_Fungi	0.0040	0.0019	0.0036	0.0025	0.0044	0.0048	0.0034	0.0172	0.0030	0.0025	0.0000	0.0000	0.0013	0.0012	0.0009	0.0010	0.0011	0.0000	0.0000	0.0000	0.0000	0.0012	0.0015	0.0000	0.0000	0.0000	0.0017	0.0010	0.0023	0.0020	0.0009	0.0038
OTU_778	G_Rhizophagus	0.0000	0.0000	0.0024	0.0000	0.0000	0.0000	0.0412	0.0054	0.0000	0.0000	0.0000	0.0000	0.0000	0.0000	0.0000	0.0000	0.0000	0.0000	0.0000	0.0000	0.0000	0.0000	0.0000	0.0000	0.0000	0.0000	0.0000	0.0000	0.0000	0.0010	0.0000	0.0000
OTU_779	D_Fungi	0.0000	0.0000	0.0000	0.0000	0.0000	0.0000	0.0000	0.0000	0.0000	0.0012	0.0093	0.0000	0.0039	0.0012	0.0000	0.0000	0.0000	0.0000	0.0000	0.0000	0.0000	0.0012	0.0000	0.0000	0.0082	0.0141	0.0051	0.0000	0.0102	0.0000	0.0000	0.0000
OTU_780	D_Fungi	0.0059	0.0028	0.0000	0.0013	0.0000	0.0019	0.0034	0.0022	0.0030	0.0012	0.0000	0.0000	0.0013	0.0000	0.0000	0.0031	0.0000	0.0000	0.0000	0.0015	0.0000	0.0012	0.0015	0.0045	0.0000	0.0000	0.0017	0.0019	0.0000	0.0000	0.0018	0.0076
OTU_781	D_Fungi	0.0020	0.0009	0.0000	0.0000	0.0067	0.0019	0.0000	0.0022	0.0020	0.0025	0.0000	0.0000	0.0000	0.0012	0.0000	0.0000	0.0000	0.0000	0.0000	0.0000	0.0015	0.0012	0.0000	0.0000	0.0095	0.0063	0.0068	0.0010	0.0011	0.0010	0.0009	0.0000
OTU_782	D_Fungi	0.0208	0.0047	0.0012	0.0013	0.0022	0.0057	0.0017	0.0172	0.0000	0.0000	0.0000	0.0000	0.0013	0.0000	0.0000	0.0000	0.0011	0.0000	0.0000	0.0000	0.0000	0.0000	0.0000	0.0000	0.0000	0.0000	0.0000	0.0000	0.0000	0.0000	0.0000	0.0000
OTU_783	D_Fungi	0.0020	0.0009	0.0048	0.0025	0.0000	0.0029	0.0000	0.0032	0.0030	0.0037	0.0000	0.0000	0.0026	0.0012	0.0018	0.0000	0.0011	0.0010	0.0081	0.0000	0.0000	0.0012	0.0015	0.0015	0.0014	0.0047	0.0051	0.0038	0.0000	0.0020	0.0027	0.0057
OTU_784	D_Fungi	0.0000	0.0000	0.0000	0.0000	0.0011	0.0000	0.0008	0.0000	0.0000	0.0000	0.0000	0.0027	0.0000	0.0000	0.0000	0.0000	0.0439	0.0149	0.0000	0.0000	0.0058	0.0098	0.0146	0.0045	0.0136	0.0031	0.0000	0.0124	0.0057	0.0000	0.0000	0.0000
OTU_785	O_Glomerales	0.0000	0.0000	0.0000	0.0000	0.0311	0.0067	0.0059	0.0269	0.0000	0.0025	0.0075	0.0000	0.0000	0.0049	0.0197	0.0010	0.0000	0.0000	0.0000	0.0000	0.0000	0.0037	0.0029	0.0000	0.0014	0.0047	0.0000	0.0010	0.0000	0.0128	0.0054	0.0076
OTU_786	C_Sordariomycetes	0.0020	0.0009	0.0000	0.0013	0.0011	0.0010	0.0008	0.0022	0.0010	0.0000	0.0000	0.0000	0.0039	0.0000	0.0000	0.0010	0.0000	0.0000	0.0000	0.0000	0.0000	0.0000	0.0000	0.0000	0.0000	0.0000	0.0000	0.0000	0.0000	0.0000	0.0000	0.0000
OTU_787	G_Conocybe	0.0000	0.0000	0.0000	0.0000	0.0011	0.0095	0.0000	0.0000	0.0000	0.0099	0.0000	0.0000	0.0000	0.0000	0.0009	0.0000	0.0000	0.0000	0.0027	0.0000	0.0000	0.0012	0.0117	0.0015	0.0000	0.0000	0.0000	0.0000	0.0011	0.0000	0.0000	0.0000
OTU_788	G_Glomus	0.0000	0.0000	0.0000	0.0051	0.0000	0.0019	0.0000	0.0000	0.0000	0.0000	0.0000	0.0000	0.0078	0.0000	0.0000	0.0000	0.0000	0.0000	0.0000	0.0000	0.0000	0.0000	0.0000	0.0000	0.0000	0.0000	0.0000	0.0000	0.0000	0.0000	0.0000	0.0000
OTU_789	D_Fungi	0.0010	0.0009	0.0000	0.0000	0.0011	0.0000	0.0000	0.0022	0.0000	0.0000	0.0000	0.0000	0.0000	0.0000	0.0000	0.0000	0.0011	0.0020	0.0000	0.0000	0.0000	0.0025	0.0000	0.0000	0.0000	0.0000	0.0000	0.0000	0.0000	0.0000	0.0000	0.0000
OTU_790	D_Fungi	0.0000	0.0000	0.0000	0.0000	0.0000	0.0000	0.0000	0.0000	0.0000	0.0000	0.0037	0.0067	0.0000	0.0000	0.0009	0.0000	0.0000	0.0030	0.0000	0.0000	0.0000	0.0000	0.0015	0.0000	0.0000	0.0016	0.0000	0.0000	0.0091	0.0108	0.0000	0.0019
OTU_791	D_Fungi	0.0139	0.0019	0.0000	0.0013	0.0011	0.0010	0.0042	0.0075	0.0060	0.0012	0.0019	0.0000	0.0013	0.0000	0.0018	0.0041	0.0143	0.0010	0.0000	0.0015	0.0029	0.0012	0.0029	0.0015	0.0027	0.0016	0.0000	0.0019	0.0034	0.0010	0.0018	0.0000
OTU_792	G_Glomus	0.0000	0.0000	0.0000	0.0000	0.0000	0.0000	0.0000	0.0000	0.0190	0.0000	0.0131	0.0000	0.0078	0.0012	0.0152	0.0000	0.0000	0.0000	0.0000	0.0000	0.0000	0.0000	0.0000	0.0000	0.0000	0.0031	0.0000	0.0000	0.0000	0.0000	0.0000	0.0019
OTU_793	P_Ascomycota	0.0000	0.0000	0.0000	0.0000	0.0000	0.0000	0.0000	0.0065	0.0000	0.0000	0.0000	0.1237	0.0039	0.0000	0.0009	0.0020	0.0000	0.0000	0.0000	0.0030	0.0000	0.0000	0.0015	0.0165	0.0000	0.0000	0.0017	0.0000	0.0000	0.0000	0.0000	0.0000
OTU_794	D_Fungi	0.0089	0.0000	0.0000	0.0000	0.0000	0.0000	0.0000	0.0086	0.0000	0.0000	0.0000	0.0000	0.0000	0.0000	0.0000	0.0000	0.0000	0.0000	0.0000	0.0000	0.0000	0.0000	0.0000	0.0000	0.0000	0.0000	0.0000	0.0000	0.0000	0.0000	0.0000	0.0000
OTU_795	D_Fungi	0.0000	0.0000	0.0012	0.0000	0.0000	0.0019	0.0000	0.0022	0.0000	0.0000	0.0000	0.0000	0.0000	0.0000	0.0000	0.0000	0.0000	0.0010	0.0000	0.0015	0.0000	0.0025	0.0000	0.0030	0.0000	0.0000	0.0000	0.0000	0.0000	0.0000	0.0000	0.0000
OTU_796	G_Phaeosphaeria	0.0000	0.0000	0.0000	0.0000	0.0011	0.0000	0.0008	0.0043	0.0000	0.0000	0.0000	0.0013	0.0000	0.0000	0.0000	0.0010	0.0000	0.0000	0.0310	0.0000	0.0000	0.0221	0.0015	0.0000	0.0000	0.0000	0.0000	0.0000	0.0011	0.0000	0.0000	0.0000
OTU_797	G_Veronaea	0.0000	0.0000	0.0000	0.0000	0.0000	0.0266	0.0000	0.0011	0.0000	0.0000	0.0000	0.0013	0.0000	0.0000	0.0000	0.0020	0.0044	0.0000	0.0040	0.0000	0.1018	0.0025	0.0088	0.0000	0.0014	0.0031	0.0017	0.0000	0.0000	0.0000	0.0000	0.0000
OTU_798	G_Thanatephorus	0.0000	0.0000	0.0000	0.0000	0.0000	0.0000	0.0000	0.0000	0.0000	0.0000	0.0000	0.0000	0.0375	0.0000	0.0018	0.0000	0.0000	0.0000	0.0000	0.0000	0.0015	0.0037	0.0160	0.0030	0.0000	0.0000	0.0000	0.0000	0.0000	0.0000	0.0000	0.0000
OTU_799	G_Claroideoglomus	0.0010	0.0000	0.0000	0.0000	0.0011	0.0657	0.0151	0.0269	0.0000	0.0000	0.0000	0.0000	0.0013	0.0000	0.0000	0.0010	0.0000	0.0000	0.0000	0.0000	0.0000	0.0221	0.0000	0.0000	0.0000	0.0000	0.0000	0.0000	0.0000	0.0010	0.0000	0.0000
OTU_800	P_Basidiomycota	0.0030	0.0066	0.0133	0.0013	0.0245	0.0495	0.0101	0.0032	0.0000	0.0012	0.0000	0.0000	0.0000	0.0024	0.0009	0.0000	0.0000	0.0000	0.0000	0.0000	0.0000	0.0025	0.0015	0.0015	0.0014	0.0047	0.0034	0.0010	0.0023	0.0010	0.0018	0.0000
OTU_801	G_Schizothecium	0.0000	0.0009	0.0000	0.0000	0.0033	0.0067	0.0000	0.0000	0.0010	0.0000	0.0000	0.0255	0.0000	0.0012	0.0009	0.0000	0.0000	0.0000	0.0000	0.0000	0.0000	0.0012	0.0000	0.0000	0.0014	0.0031	0.0000	0.0000	0.0011	0.0020	0.0000	0.0000
OTU_802	G_Melanophyllum	0.0000	0.0009	0.0012	0.0013	0.0000	0.0866	0.0008	0.0000	0.0010	0.0000	0.0000	0.0027	0.0013	0.0000	0.0000	0.0000	0.0000	0.0010	0.0000	0.0000	0.0000	0.0000	0.0000	0.0000	0.0000	0.0000	0.0000	0.0000	0.0000	0.0000	0.0000	0.0000
OTU_803	D_Fungi	0.0000	0.0000	0.0012	0.0000	0.0000	0.0000	0.0000	0.0000	0.0000	0.0000	0.0000	0.0027	0.0000	0.0000	0.0000	0.0000	0.0000	0.0000	0.0000	0.0000	0.0044	0.0037	0.0000	0.0015	0.0000	0.0000	0.0000	0.0010	0.0000	0.0000	0.0000	0.0000
OTU_804	F_Mortierellaceae	0.0000	0.0009	0.0000	0.0013	0.0000	0.0048	0.0000	0.0000	0.0000	0.0000	0.0000	0.0094	0.0013	0.0000	0.0000	0.0000	0.0000	0.0000	0.0000	0.0000	0.0000	0.0000	0.0000	0.0000	0.0000	0.0000	0.0000	0.0000	0.0011	0.0000	0.0000	0.0000
OTU_805	D_Fungi	0.0030	0.0000	0.0000	0.0013	0.0011	0.0029	0.0008	0.0032	0.0010	0.0025	0.0009	0.0000	0.0000	0.0012	0.0018	0.0010	0.0077	0.0010	0.0000	0.0000	0.0000	0.0000	0.0015	0.0000	0.0000	0.0016	0.0000	0.0000	0.0000	0.0010	0.0027	0.0019
OTU_806	O_Agaricales	0.0000	0.0000	0.0012	0.0000	0.0022	0.0038	0.0008	0.0000	0.0000	0.0012	0.0009	0.0000	0.0000	0.0012	0.0036	0.0010	0.0044	0.0010	0.0000	0.0000	0.0044	0.0000	0.0000	0.0000	0.0014	0.0000	0.0000	0.0029	0.0011	0.0069	0.0009	0.0019
OTU_807	O_Glomerales	0.0000	0.0000	0.0000	0.0000	0.0022	0.0019	0.0000	0.0011	0.0020	0.0000	0.0009	0.0000	0.0000	0.0000	0.0009	0.0000	0.0000	0.0000	0.0000	0.0000	0.0000	0.0000	0.0000	0.0000	0.0014	0.0016	0.0017	0.0000	0.0023	0.0000	0.0009	0.0019
OTU_808	D_Fungi	0.0000	0.0206	0.0000	0.0000	0.0000	0.0019	0.0000	0.0000	0.0000	0.0000	0.0000	0.0000	0.0000	0.0000	0.0000	0.0000	0.0000	0.0000	0.0000	0.0000	0.0000	0.0000	0.0000	0.0000	0.0000	0.0000	0.0000	0.0000	0.0000	0.0000	0.0000	0.0000
OTU_809	P_Ascomycota	0.0000	0.0009	0.0000	0.0000	0.0000	0.0000	0.0000	0.0011	0.0000	0.0000	0.0000	0.0027	0.0000	0.0000	0.0000	0.0000	0.0000	0.0010	0.0000	0.0194	0.0029	0.0049	0.0088	0.6326	0.1318	0.0063	0.0000	0.0000	0.0023	0.0000	0.0018	0.0019
OTU_810	D_Fungi	0.0000	0.0028	0.0012	0.0000	0.0089	0.0010	0.0000	0.0000	0.0000	0.0012	0.0000	0.0040	0.0000	0.0024	0.0000	0.0010	0.0000	0.0010	0.0000	0.0000	0.0000	0.0000	0.0000	0.0000	0.0000	0.0000	0.0068	0.0000	0.0000	0.0167	0.0027	0.0000
OTU_811	D_Fungi	0.0000	0.0000	0.0000	0.0000	0.0011	0.0038	0.0000	0.0011	0.0000	0.0000	0.0009	0.0000	0.0026	0.0000	0.0000	0.0000	0.0000	0.0000	0.0000	0.0000	0.0000	0.0000	0.0000	0.0000	0.0000	0.0000	0.0000	0.0019	0.0000	0.0000	0.0009	0.0000
OTU_812	G_Claroideoglomus	0.0000	0.0000	0.0000	0.0000	0.0044	0.0019	0.0000	0.0000	0.0010	0.0000	0.0000	0.0000	0.0026	0.0012	0.0009	0.0051	0.0022	0.0000	0.0000	0.0000	0.0000	0.0025	0.0000	0.0000	0.0014	0.0000	0.0000	0.0000	0.0000	0.0000	0.0045	0.0000
OTU_813	P_Ascomycota	0.0000	0.0000	0.0000	0.0000	0.0000	0.0010	0.0000	0.0000	0.0050	0.0075	0.0037	0.0511	0.0194	0.0171	0.0045	0.1050	0.0000	0.0000	0.0000	0.0000	0.0000	0.0000	0.0000	0.0000	0.0000	0.0000	0.0000	0.0000	0.0000	0.0010	0.0000	0.0000
OTU_814	G_Thanatephorus	0.0000	0.0000	0.0000	0.0013	0.0089	0.0000	0.0000	0.0000	0.0000	0.0000	0.0000	0.0000	0.0000	0.0037	0.0421	0.0000	0.0000	0.0000	0.0000	0.0000	0.0015	0.0012	0.0233	0.0000	0.0000	0.0000	0.0017	0.0000	0.0023	0.0207	0.0000	0.0284
OTU_815	D_Fungi	0.0000	0.0028	0.0157	0.0000	0.0011	0.0010	0.0000	0.0000	0.0020	0.0000	0.0000	0.0000	0.0000	0.0000	0.0000	0.0000	0.0000	0.0000	0.0000	0.0000	0.0000	0.0000	0.0000	0.0000	0.0000	0.0000	0.0000	0.0000	0.0000	0.0000	0.0000	0.0000
OTU_816	P_Basidiomycota	0.0020	0.0009	0.0266	0.0241	0.0067	0.0029	0.0774	0.0022	0.0030	0.0000	0.0000	0.0081	0.0013	0.0024	0.0000	0.0214	0.0033	0.0000	0.0000	0.0015	0.0174	0.0074	0.0000	0.0000	0.0000	0.0016	0.0017	0.0029	0.0000	0.0000	0.0072	0.0000
OTU_817	D_Fungi	0.0059	0.0000	0.0024	0.0025	0.0000	0.0000	0.0008	0.0043	0.0100	0.0075	0.0000	0.0000	0.0000	0.0000	0.0000	0.0000	0.0033	0.0010	0.0027	0.0030	0.0015	0.0000	0.0015	0.0045	0.0082	0.0031	0.0051	0.0019	0.0023	0.0000	0.0000	0.0019
OTU_818	D_Fungi	0.0000	0.0019	0.0000	0.0000	0.0000	0.0000	0.0000	0.0011	0.0060	0.0000	0.0009	0.0000	0.0000	0.0000	0.0000	0.0000	0.0000	0.0000	0.0000	0.0000	0.0000	0.0012	0.0000	0.0000	0.0000	0.0000	0.0000	0.0000	0.0000	0.0000	0.0000	0.0000
OTU_819	D_Fungi	0.0010	0.0000	0.0000	0.0000	0.0000	0.0010	0.0008	0.0000	0.0050	0.0012	0.0000	0.0000	0.0000	0.0000	0.0000	0.0010	0.0055	0.0000	0.0000	0.0000	0.0015	0.0000	0.0000	0.0000	0.0041	0.0016	0.0017	0.0010	0.0034	0.0030	0.0009	0.0057
OTU_820	F_Mortierellaceae	0.0000	0.0000	0.0000	0.0025	0.0000	0.0000	0.0000	0.0000	0.0000	0.0000	0.0000	0.0027	0.0000	0.0000	0.0000	0.0000	0.0000	0.0000	0.0081	0.0000	0.0000	0.0000	0.0000	0.0000	0.0000	0.0000	0.0000	0.0000	0.0000	0.0000	0.0000	0.0000
OTU_821	D_Fungi	0.0000	0.0009	0.0000	0.0000	0.1000	0.0010	0.0000	0.0000	0.0000	0.0000	0.0000	0.0000	0.0000	0.0012	0.0000	0.0000	0.0011	0.0020	0.0862	0.0015	0.0044	0.0761	0.5848	0.0015	0.0000	0.0000	0.0322	0.0000	0.0000	0.0030	0.0000	0.0019
OTU_822	D_Fungi	0.0040	0.0000	0.0000	0.0000	0.0022	0.0000	0.0000	0.0011	0.0000	0.0025	0.0000	0.0000	0.0000	0.0000	0.0009	0.0020	0.0011	0.0000	0.0000	0.0000	0.0000	0.0012	0.0000	0.0015	0.0014	0.0000	0.0000	0.0000	0.0000	0.0000	0.0000	0.0000
OTU_823	G_Funneliformis	0.0000	0.0019	0.0012	0.0051	0.1178	0.6499	0.0135	0.2048	0.0000	0.0000	0.0000	0.0000	0.0155	0.0049	0.0009	0.0000	0.0000	0.0000	0.0000	0.0000	0.0000	0.0012	0.0058	0.0030	0.0000	0.0000	0.0000	0.0000	0.0011	0.0020	0.0000	0.0019
OTU_824	D_Fungi	0.0000	0.0000	0.0012	0.0025	0.0000	0.0000	0.0000	0.0000	0.0080	0.0000	0.0009	0.0013	0.0013	0.0012	0.0081	0.0000	0.0000	0.0000	0.0000	0.0000	0.0000	0.0000	0.0000	0.0000	0.0014	0.0078	0.0034	0.0095	0.0023	0.0010	0.0009	0.0000
OTU_825	D_Fungi	0.0020	0.0000	0.0012	0.0025	0.0011	0.0010	0.0008	0.0000	0.0010	0.0000	0.0037	0.0013	0.0013	0.0000	0.0009	0.0010	0.0000	0.0000	0.0000	0.0000	0.0000	0.0000	0.0000	0.0015	0.0027	0.0016	0.0034	0.0000	0.0023	0.0030	0.0091	0.0038
OTU_826	D_Fungi	0.0010	0.0000	0.0012	0.0000	0.0178	0.0181	0.0328	0.0172	0.0040	0.0025	0.0000	0.0000	0.0026	0.0195	0.0036	0.0031	0.0011	0.0000	0.0013	0.0000	0.0015	0.0037	0.0000	0.0000	0.0041	0.0031	0.0000	0.0010	0.0125	0.0187	0.0018	0.0038
OTU_827	G_Glomus	0.0000	0.0000	0.0000	0.0000	0.0033	0.0000	0.0008	0.0000	0.0040	0.0000	0.0000	0.0000	0.0000	0.0049	0.0000	0.0000	0.0000	0.0000	0.0000	0.0000	0.0000	0.0000	0.0000	0.0000	0.0000	0.0000	0.0000	0.0000	0.0000	0.0000	0.0000	0.0000
OTU_828	D_Fungi	0.0000	0.0009	0.0000	0.0000	0.0011	0.0000	0.0000	0.0000	0.0070	0.0000	0.0000	0.0054	0.0129	0.0024	0.0000	0.0092	0.0000	0.0000	0.0000	0.0000	0.0000	0.0000	0.0000	0.0000	0.0014	0.0000	0.0000	0.0000	0.0000	0.0000	0.0000	0.0000
OTU_829	F_Pezizaceae	0.0000	0.0000	0.0000	0.0000	0.0056	0.0000	0.0000	0.0000	0.0020	0.0025	0.0000	0.0000	0.0000	0.0037	0.0018	0.0133	0.0000	0.0040	0.0000	0.0000	0.0000	0.0000	0.0000	0.0000	0.0027	0.0000	0.0068	0.0000	0.0023	0.0020	0.0000	0.0000
OTU_830	D_Fungi	0.0000	0.0000	0.0000	0.0000	0.0044	0.0000	0.0000	0.0000	0.0000	0.0000	0.0056	0.0000	0.0000	0.0000	0.0000	0.0000	0.0000	0.0000	0.0000	0.0000	0.0000	0.0000	0.0000	0.0000	0.0000	0.0000	0.0000	0.0000	0.0000	0.0000	0.0000	0.0000
OTU_831	P_Ascomycota	0.0000	0.0009	0.0230	0.0025	0.0000	0.0000	0.0000	0.0000	0.0030	0.0000	0.0009	0.0134	0.0000	0.0000	0.0000	0.0010	0.0000	0.0010	0.0027	0.0045	0.0015	0.0000	0.0088	0.0060	0.0000	0.0000	0.0017	0.0000	0.0011	0.0000	0.0000	0.0019
OTU_832	D_Fungi	0.0000	0.0000	0.0000	0.0000	0.0000	0.0000	0.0000	0.0000	0.0020	0.0062	0.0000	0.0013	0.0000	0.0000	0.0000	0.0000	0.0000	0.0000	0.0000	0.0000	0.0000	0.0000	0.0000	0.0000	0.0000	0.0000	0.0000	0.0000	0.0000	0.0000	0.0000	0.0000
OTU_833	G_Crocicreas	0.0040	0.0028	0.0061	0.0013	0.0011	0.0000	0.0017	0.0000	0.0000	0.0000	0.0000	0.0000	0.0000	0.0000	0.0000	0.0000	0.0000	0.0080	0.0283	0.0045	0.0015	0.0000	0.4156	0.0105	0.0000	0.0000	0.0000	0.0000	0.0000	0.0010	0.0000	0.0000
OTU_834	D_Fungi	0.0000	0.0000	0.0000	0.0000	0.0000	0.0000	0.0000	0.0000	0.0010	0.0075	0.0028	0.0255	0.0000	0.0000	0.0000	0.0000	0.0000	0.0697	0.0000	0.0000	0.0000	0.0000	0.0000	0.0000	0.0082	0.0000	0.0000	0.0010	0.0011	0.0000	0.0000	0.0019
OTU_835	D_Fungi	0.0059	0.0037	0.0012	0.0038	0.0022	0.0010	0.0050	0.0075	0.0210	0.0037	0.0047	0.0013	0.0000	0.0073	0.0018	0.0082	0.0154	0.0020	0.0013	0.0030	0.0044	0.0012	0.0088	0.0105	0.0095	0.0031	0.0017	0.0057	0.0023	0.0059	0.0027	0.0114
OTU_836	G_Olpidium_brassicae	0.0000	0.0000	0.0000	0.0000	0.0000	0.0000	0.0000	0.0000	0.0010	0.0025	0.0019	0.0040	0.0000	0.0000	0.0045	0.0000	0.0033	0.0000	0.0027	0.0074	0.0000	0.0000	0.0000	0.0015	0.0000	0.0016	0.0000	0.0000	0.0011	0.0030	0.0027	0.0000
OTU_837	G_Myrmecridium	0.0000	0.0037	0.0000	0.0000	0.0000	0.0000	0.0000	0.0000	0.0000	0.0000	0.0019	0.0027	0.0000	0.0000	0.0000	0.0000	0.0000	0.0000	0.0000	0.0000	0.0000	0.0000	0.0000	0.0000	0.0000	0.0000	0.0000	0.0000	0.0000	0.0000	0.0000	0.0000
OTU_838	D_Fungi	0.0000	0.0047	0.0000	0.0013	0.0011	0.0000	0.0017	0.0011	0.0030	0.0025	0.0000	0.0000	0.0000	0.0000	0.0000	0.0000	0.0011	0.0030	0.0027	0.0000	0.0000	0.0000	0.0015	0.0000	0.0000	0.0000	0.0000	0.0029	0.0045	0.0010	0.0000	0.0209
OTU_839	D_Fungi	0.0000	0.0009	0.0024	0.0000	0.0000	0.0010	0.0017	0.0000	0.0010	0.0050	0.0000	0.0013	0.0000	0.0012	0.0000	0.0000	0.0000	0.0000	0.0040	0.0030	0.0000	0.0000	0.0000	0.0000	0.0000	0.0016	0.0017	0.0038	0.0057	0.0030	0.0000	0.0057
OTU_840	D_Fungi	0.0000	0.0047	0.0012	0.0000	0.0000	0.0010	0.0008	0.0000	0.0040	0.0050	0.0000	0.0013	0.0026	0.0000	0.0000	0.0000	0.0022	0.0000	0.0000	0.0015	0.0015	0.0012	0.0000	0.0000	0.0068	0.0000	0.0000	0.0000	0.0011	0.0010	0.0009	0.0000
OTU_841	O_Glomerales	0.0000	0.0000	0.0000	0.0000	0.0000	0.0000	0.0000	0.0022	0.0000	0.0087	0.0000	0.0000	0.0052	0.0000	0.0224	0.0000	0.0000	0.0000	0.0000	0.0000	0.0015	0.0000	0.0000	0.0015	0.0014	0.0000	0.0034	0.0010	0.0000	0.0000	0.0000	0.0000
OTU_842	D_Fungi	0.0020	0.0019	0.0000	0.0000	0.0033	0.0000	0.0017	0.0022	0.0000	0.0000	0.0000	0.0013	0.0000	0.0000	0.0000	0.0000	0.0000	0.0000	0.0013	0.0000	0.0000	0.0025	0.0000	0.0000	0.0014	0.0000	0.0000	0.0000	0.0011	0.0020	0.0000	0.0000
OTU_843	G_Bionectria	0.0000	0.0019	0.0012	0.0000	0.0000	0.0000	0.0000	0.0011	0.0000	0.0000	0.0000	0.0000	0.0026	0.0049	0.0018	0.0000	0.0000	0.0010	0.0000	0.0000	0.0000	0.0000	0.0044	0.0105	0.0000	0.0000	0.0000	0.0019	0.0000	0.0000	0.0000	0.0000
OTU_844	D_Fungi	0.0030	0.0009	0.0000	0.0013	0.0000	0.0000	0.0000	0.0000	0.0020	0.0050	0.0000	0.0000	0.0000	0.0000	0.0009	0.0000	0.0044	0.0000	0.0000	0.0000	0.0000	0.0025	0.0000	0.0000	0.0095	0.0000	0.0000	0.0000	0.0011	0.0010	0.0009	0.0019
OTU_845	D_Fungi	0.0050	0.0019	0.0024	0.0000	0.0011	0.0000	0.0000	0.0000	0.0000	0.0000	0.0009	0.0000	0.0000	0.0000	0.0000	0.0000	0.0000	0.0010	0.0000	0.0000	0.0000	0.0000	0.0000	0.0000	0.0000	0.0000	0.0000	0.0000	0.0000	0.0000	0.0000	0.0000
OTU_846	D_Fungi	0.0000	0.0000	0.0000	0.0000	0.0011	0.0000	0.0000	0.0000	0.0000	0.0075	0.0056	0.0000	0.0207	0.0000	0.0099	0.0092	0.0000	0.0000	0.0000	0.0000	0.0000	0.0000	0.0000	0.0120	0.0000	0.0031	0.0000	0.0067	0.0011	0.0069	0.0163	0.0171
OTU_847	D_Fungi	0.0000	0.0000	0.0000	0.0000	0.0000	0.0000	0.0000	0.0000	0.0000	0.0162	0.0000	0.0000	0.0000	0.0000	0.0000	0.0000	0.0000	0.0000	0.0040	0.0030	0.0000	0.0074	0.0190	0.0000	0.0000	0.0000	0.0000	0.0000	0.0011	0.0118	0.0000	0.0000
OTU_848	G_Piptocephalis	0.0000	0.0009	0.0048	0.0025	0.0000	0.0000	0.0000	0.0000	0.0050	0.0037	0.0009	0.0000	0.0026	0.0000	0.0000	0.0010	0.0000	0.0000	0.0013	0.0015	0.0000	0.0000	0.0000	0.0000	0.0027	0.0063	0.0034	0.0019	0.0023	0.0020	0.0000	0.0038
OTU_849	D_Fungi	0.0000	0.0000	0.0000	0.0000	0.0000	0.0000	0.0000	0.0000	0.0010	0.0199	0.0037	0.0000	0.0000	0.0000	0.0000	0.0000	0.0000	0.0000	0.0013	0.1161	0.0000	0.0000	0.0000	0.0000	0.0000	0.0000	0.0000	0.0000	0.0000	0.0000	0.0000	0.0000
OTU_850	D_Fungi	0.0059	0.0000	0.0000	0.0000	0.0000	0.0000	0.0008	0.0000	0.0000	0.0000	0.0000	0.0000	0.0000	0.0000	0.0000	0.0010	0.0077	0.0000	0.0000	0.0000	0.0000	0.0025	0.0000	0.0000	0.0082	0.0000	0.0017	0.0000	0.0000	0.0000	0.0000	0.0019
OTU_851	F_Mortierellaceae	0.0000	0.0000	0.0000	0.0000	0.0000	0.0000	0.0000	0.0000	0.0000	0.0000	0.0000	0.0000	0.0000	0.0000	0.0000	0.0000	0.0000	0.0000	0.0013	0.0000	0.0015	0.0000	0.0000	0.0000	0.0014	0.0000	0.0000	0.0010	0.0080	0.0020	0.0000	0.0000
OTU_852	D_Fungi	0.0000	0.0000	0.0048	0.0000	0.0022	0.0000	0.0008	0.0000	0.0000	0.0000	0.0000	0.0000	0.0000	0.0000	0.0000	0.0000	0.0011	0.0000	0.0040	0.0015	0.0000	0.0037	0.0015	0.0000	0.0027	0.0000	0.0000	0.0000	0.0000	0.0000	0.0000	0.0000
OTU_853	G_Basidiobolus	0.0000	0.0000	0.0000	0.0000	0.0000	0.0143	0.0000	0.0000	0.0120	0.0000	0.0000	0.0000	0.0000	0.0000	0.0000	0.0000	0.0000	0.0000	0.0000	0.0000	0.0000	0.0000	0.0000	0.0000	0.0000	0.0000	0.0000	0.0000	0.0000	0.0000	0.0000	0.0152
OTU_854	D_Fungi	0.0010	0.0009	0.0036	0.0000	0.0000	0.0010	0.0008	0.0000	0.0010	0.0000	0.0000	0.0000	0.0039	0.0012	0.0000	0.0000	0.0011	0.0020	0.0000	0.0000	0.0000	0.0000	0.0058	0.0000	0.0027	0.0000	0.0034	0.0019	0.0011	0.0059	0.0009	0.0000
OTU_855	O_Agaricales	0.0000	0.0000	0.0000	0.0000	0.0000	0.0000	0.0000	0.0000	0.0020	1.3434	0.0065	0.0000	0.0039	0.0012	0.0000	0.0000	0.0000	0.0000	0.0000	0.0015	0.0000	0.0000	0.0000	0.0000	0.0014	0.0016	0.0017	0.0010	0.0000	0.0030	0.0000	0.0000
OTU_856	D_Fungi	0.0109	0.0019	0.0061	0.0063	0.0033	0.0067	0.0025	0.0022	0.0050	0.0012	0.0000	0.0000	0.0013	0.0037	0.0009	0.0000	0.0011	0.0000	0.0000	0.0000	0.0000	0.0000	0.0000	0.0000	0.0014	0.0000	0.0000	0.0029	0.0011	0.0020	0.0018	0.0019
OTU_857	D_Fungi	0.0040	0.0000	0.0000	0.0025	0.0011	0.0029	0.0008	0.0108	0.0050	0.0012	0.0009	0.0013	0.0000	0.0000	0.0000	0.0000	0.0132	0.0010	0.0067	0.0060	0.0015	0.0037	0.0073	0.0120	0.0014	0.0000	0.0034	0.0019	0.0000	0.0010	0.0009	0.0019
OTU_858	G_Archaeospora	0.0000	0.0000	0.0024	0.0101	0.0000	0.0010	0.0000	0.0000	0.0010	0.0050	0.0009	0.0000	0.0052	0.0012	0.0036	0.0020	0.0000	0.0000	0.0000	0.0000	0.0000	0.0000	0.0000	0.0000	0.0000	0.0000	0.0000	0.0000	0.0011	0.0000	0.0000	0.0000
OTU_859	F_Orbiliaceae	0.0000	0.0000	0.0000	0.0000	0.0000	0.0000	0.0000	0.0000	0.0000	0.0062	0.0000	0.0013	0.0000	0.0012	0.0000	0.0051	0.0000	0.0000	0.0000	0.0000	0.0000	0.0000	0.0000	0.0030	0.0000	0.0000	0.0000	0.0000	0.0000	0.0000	0.0000	0.0000
OTU_860	O_Pleosporales	0.0000	0.0009	0.0000	0.0000	0.0000	0.0010	0.0000	0.0011	0.0150	0.0211	0.0000	0.0000	0.0893	0.0049	0.0000	0.0031	0.0000	0.0000	0.0000	0.0000	0.0000	0.0000	0.0000	0.0000	0.0000	0.0000	0.0000	0.0000	0.0000	0.0000	0.0000	0.0000
OTU_861	P_Ascomycota	0.0000	0.0009	0.0000	0.0000	0.0000	0.0000	0.0000	0.0000	0.0000	0.0012	0.0019	0.0000	0.0000	0.0000	0.0000	0.0020	0.0000	0.0010	0.0000	0.0015	0.0000	0.0000	0.0000	0.0000	0.0000	0.0000	0.0034	0.0000	0.0000	0.0000	0.0000	0.0000
OTU_862	D_Fungi	0.0000	0.0000	0.0000	0.0013	0.0000	0.0000	0.0000	0.0000	0.0030	0.0025	0.0009	0.0000	0.0000	0.0000	0.0000	0.0041	0.0000	0.0000	0.0000	0.0000	0.0044	0.0000	0.0000	0.0030	0.0000	0.0016	0.0000	0.0000	0.0000	0.0030	0.0009	0.0000
OTU_863	P_Basidiomycota	0.0000	0.0000	0.0012	0.0000	0.0000	0.0000	0.0000	0.0000	0.0000	0.0000	0.0000	0.0027	0.0000	0.0000	0.0009	0.0071	0.0055	0.0020	0.0916	0.3484	0.0029	0.0012	0.0452	0.0598	0.0000	0.0031	0.0034	0.0038	0.0011	0.0000	0.0018	0.0000
OTU_864	D_Fungi	0.0030	0.0000	0.0000	0.0000	0.0044	0.0000	0.0000	0.0000	0.0000	0.0025	0.0000	0.0000	0.0000	0.0012	0.0000	0.0010	0.0000	0.0000	0.0000	0.0000	0.0000	0.0000	0.0000	0.0000	0.0000	0.0000	0.0000	0.0000	0.0000	0.0000	0.0000	0.0000
OTU_865	G_Ramicandelaber	0.0030	0.0009	0.0000	0.0000	0.0044	0.0019	0.0008	0.0032	0.0000	0.0012	0.0019	0.0000	0.0000	0.0012	0.0072	0.0020	0.0011	0.0000	0.0027	0.0089	0.0000	0.0000	0.0000	0.0150	0.0014	0.0016	0.0000	0.0057	0.0000	0.0010	0.0045	0.0000
OTU_866	G_Ramicandelaber	0.0010	0.0000	0.0012	0.0000	0.0033	0.0010	0.0008	0.0011	0.0030	0.0050	0.0009	0.0000	0.0013	0.0000	0.0000	0.0000	0.0000	0.0000	0.0000	0.0015	0.0000	0.0012	0.0000	0.0000	0.0000	0.0000	0.0000	0.0000	0.0000	0.0000	0.0009	0.0000
OTU_867	G_Truncatella	0.0000	0.0000	0.0000	0.0000	0.0022	0.0000	0.0000	0.0000	0.0000	0.0000	0.0000	0.0027	0.0000	0.0000	0.0000	0.0000	0.0000	0.0000	0.0000	0.0000	0.0000	0.0000	0.0000	0.0000	0.0000	0.0000	0.0000	0.0048	0.0000	0.0000	0.0000	0.0000
OTU_868	D_Fungi	0.0030	0.0000	0.0000	0.0013	0.0133	0.0010	0.0000	0.0000	0.0000	0.0000	0.0000	0.0000	0.0000	0.0000	0.0000	0.0000	0.0000	0.0000	0.0000	0.0000	0.0000	0.0000	0.0000	0.0000	0.0000	0.0000	0.0000	0.0000	0.0000	0.0000	0.0000	0.0000
OTU_869	G_Diversispora	0.0000	0.0000	0.0000	0.0000	0.0033	0.0000	0.0000	0.0000	0.0000	0.0000	0.0000	0.0000	0.0142	0.0000	0.0314	0.0000	0.0000	0.0110	0.0000	0.0000	0.0015	0.0000	0.0000	0.0000	0.0068	0.0000	0.0000	0.0000	0.0000	0.0000	0.0009	0.0000
OTU_870	D_Fungi	0.0000	0.0000	0.0000	0.0025	0.0011	0.0000	0.0008	0.0011	0.0040	0.0000	0.0028	0.0027	0.0000	0.0012	0.0000	0.0071	0.0033	0.0010	0.0013	0.0015	0.0000	0.0025	0.0088	0.0015	0.0027	0.0063	0.0017	0.0029	0.0034	0.0020	0.0018	0.0057
OTU_871	D_Fungi	0.0000	0.0000	0.0000	0.0000	0.0000	0.0019	0.0000	0.0000	0.0020	0.0012	0.0009	0.0027	0.0000	0.0000	0.0000	0.0051	0.0033	0.0020	0.0000	0.0000	0.0000	0.0000	0.0015	0.0015	0.0000	0.0000	0.0000	0.0000	0.0000	0.0000	0.0000	0.0000
OTU_872	G_Coprinellus	0.0000	0.0000	0.0000	0.0000	0.0011	0.0000	0.0017	0.0000	0.0000	0.0000	0.0000	0.0013	0.0000	0.0024	0.0018	0.0000	0.0011	0.0020	0.0000	0.0000	0.0073	0.0025	3.4170	0.0000	0.0815	0.1065	0.0526	0.0134	0.0011	0.0000	0.0054	0.0000
OTU_873	G_Dokmaia	0.0000	0.0000	0.0000	0.0000	0.0000	0.0000	0.0000	0.0000	0.0000	0.0087	0.0000	0.0000	0.0000	0.0000	0.0000	0.0031	0.0000	0.0000	0.0000	0.0000	0.0000	0.0000	0.0000	0.0000	0.0000	0.0000	0.0000	0.0000	0.0000	0.0000	0.0000	0.0000
OTU_874	D_Fungi	0.0000	0.0000	0.0000	0.0000	0.0000	0.0019	0.0000	0.0000	0.0000	0.0447	0.0000	0.0000	0.0000	0.0000	0.0000	0.0000	0.0000	0.0000	0.0000	0.0000	0.0000	0.0086	0.0000	0.0000	0.0000	0.0000	0.0678	0.0000	0.0000	0.0000	0.0000	0.0000
OTU_875	C_Sordariomycetes	0.0000	0.0000	0.0000	0.0000	0.0000	0.0000	0.0000	0.0000	0.0000	0.0708	0.0000	0.0000	0.3067	0.0110	0.0000	0.0000	0.0000	0.0000	0.0000	0.0000	0.0000	0.0000	0.0000	0.0000	0.0000	0.0000	0.0000	0.0000	0.0011	0.0000	0.0000	0.0000
OTU_876	P_Ascomycota	0.0069	0.0206	0.0036	0.0038	0.0011	0.0000	0.0008	0.0000	0.0000	0.0000	0.0019	0.0067	0.0000	0.0000	0.0000	0.0000	0.0011	0.0000	0.0000	0.0000	0.0000	0.0000	0.0000	0.0000	0.0000	0.0000	0.0000	0.0010	0.0000	0.0000	0.0000	0.0000
OTU_877	C_Agaricomycetes	0.0050	0.0000	0.0012	0.0000	0.0033	0.0000	0.0000	0.0000	0.0000	0.0000	0.0000	0.0013	0.0000	0.0012	0.0009	0.0000	0.0000	0.0020	0.0067	0.0000	0.0029	0.0000	0.0175	0.0060	0.0000	0.0000	0.0000	0.0000	0.0011	0.0039	0.0009	0.0000
OTU_878	D_Fungi	0.0040	0.0000	0.0000	0.0000	0.0000	0.0000	0.0000	0.0011	0.0050	0.0012	0.0000	0.0027	0.0000	0.0000	0.0000	0.0051	0.0022	0.0010	0.0013	0.0060	0.0015	0.0000	0.0044	0.0015	0.0027	0.0000	0.0000	0.0019	0.0011	0.0010	0.0000	0.0000
OTU_879	D_Fungi	0.0000	0.0000	0.0000	0.0000	0.0000	0.0000	0.0000	0.0000	0.0000	0.0000	0.0000	0.0000	0.0000	0.0000	0.0000	0.0000	0.0055	0.0080	0.0027	0.0104	0.0000	0.0012	0.0029	0.0015	0.0231	0.0031	0.0051	0.0019	0.0034	0.0049	0.0190	0.0057
OTU_880	G_Mortierella	0.0000	0.0000	0.0000	0.0000	0.0011	0.0000	0.0008	0.0000	0.0000	0.0000	0.0000	0.0027	0.0013	0.0000	0.0009	0.0031	0.0022	0.0000	0.0000	0.0000	0.0000	0.0000	0.0015	0.0000	0.0000	0.0000	0.0034	0.0000	0.0011	0.0000	0.0009	0.0038
OTU_881	C_Sordariomycetes	0.0000	0.0000	0.0000	0.0000	0.0044	0.0000	0.0000	0.0000	0.0000	0.0000	0.0028	0.0000	0.0000	0.0000	0.0000	0.0000	0.0000	0.0000	0.0000	0.0000	0.0000	0.0000	0.0000	0.0000	0.0000	0.0000	0.0000	0.0000	0.0000	0.0000	0.0000	0.0000
OTU_882	D_Fungi	0.0000	0.0000	0.0000	0.0000	0.0000	0.0000	0.0000	0.0000	0.0000	0.0000	0.0000	0.0000	0.0000	0.0000	0.0045	0.0082	0.0000	0.0000	0.0013	0.0000	0.0000	0.0000	0.0000	0.0105	0.0000	0.0000	0.0000	0.0000	0.0000	0.0010	0.0000	0.0000
OTU_883	D_Fungi	0.0000	0.0000	0.0000	0.0013	0.0011	0.0010	0.0000	0.0000	0.0000	0.0037	0.0037	0.0000	0.0000	0.0000	0.0036	0.0000	0.0000	0.0000	0.0000	0.0000	0.0000	0.0000	0.0000	0.0000	0.0000	0.0000	0.0017	0.0000	0.0000	0.0000	0.0000	0.0000
OTU_884	O_Sordariales	0.0000	0.0000	0.0000	0.0000	0.0000	0.0000	0.0000	0.0000	0.0020	0.0000	0.0000	0.0013	0.0000	0.0000	0.0000	0.0000	0.4427	0.0020	0.0000	0.0000	0.6498	0.0147	0.0000	0.0015	0.0353	0.0078	0.0136	0.0181	0.0000	0.1663	0.0000	0.0000
OTU_885	F_Diversisporaceae	0.0000	0.0000	0.0000	0.0000	0.0000	0.0000	0.0000	0.0000	0.0010	0.0000	0.0000	0.0000	0.0026	0.0000	0.0054	0.0000	0.0000	0.0060	0.0000	0.0000	0.0000	0.0000	0.0000	0.0000	0.0014	0.0000	0.0000	0.0000	0.0000	0.0000	0.0000	0.0000
OTU_886	G_Paecilomyces	0.0000	0.0000	0.0000	0.0013	0.0011	0.0000	0.0000	0.0000	0.0000	0.0000	0.0000	0.0054	0.0013	0.0012	0.0045	0.0010	0.0011	0.0060	0.0000	0.0060	0.0015	0.0000	0.0015	0.0060	0.0014	0.0016	0.0000	0.0010	0.0011	0.0108	0.0000	0.0038
OTU_887	C_Dothideomycetes	0.0000	0.0000	0.0000	0.0000	0.0000	0.0000	0.0000	0.0000	0.0040	0.0000	0.0000	0.0000	0.0000	0.0000	0.0000	0.0000	0.0000	0.0000	0.0000	0.0000	0.0000	0.0147	0.0029	0.0045	0.0000	0.0000	0.0000	0.0000	0.3079	0.0059	0.0009	0.0076
OTU_888	P_Ascomycota	0.0000	0.0000	0.0000	0.0000	0.0000	0.0000	0.0000	0.0000	0.0000	0.0000	0.0000	0.0000	0.0000	0.0195	0.0054	0.0010	0.0000	0.0000	0.0000	0.0000	0.0000	0.0000	0.0000	0.0000	0.0000	0.0000	0.0000	0.0000	0.0000	0.0000	0.0000	0.0000
OTU_889	D_Fungi	0.0020	0.0000	0.0000	0.0000	0.0000	0.0010	0.0000	0.0011	0.0040	0.0000	0.0000	0.0000	0.0000	0.0012	0.0000	0.0010	0.0000	0.0000	0.0000	0.0000	0.0000	0.0000	0.0000	0.0000	0.0000	0.0000	0.0000	0.0000	0.0000	0.0000	0.0000	0.0000
OTU_890	D_Fungi	0.0000	0.0000	0.0000	0.0000	0.0000	0.0000	0.0000	0.0000	0.0000	0.0000	0.0000	0.0000	0.0000	0.0012	0.0018	0.0020	0.0000	0.0000	0.0000	0.0000	0.0000	0.0000	0.0000	0.0000	0.0000	0.0000	0.0000	0.0000	0.0000	0.0000	0.0009	0.0000
OTU_891	G_Glomus	0.0000	0.0000	0.0000	0.0000	0.0000	0.0010	0.0000	0.0000	0.0000	0.0000	0.0000	0.0000	0.0168	0.0085	0.0027	0.0000	0.0000	0.0000	0.0000	0.0000	0.0000	0.0000	0.0000	0.0000	0.0000	0.0000	0.0000	0.0000	0.0000	0.0000	0.0000	0.0000
OTU_892	D_Fungi	0.0000	0.0000	0.0000	0.0000	0.0000	0.0000	0.0000	0.0000	0.0060	0.0000	0.0000	0.0000	0.0000	0.0000	0.0000	0.0000	0.0000	0.0000	0.0000	0.0000	0.0000	0.0000	0.0000	0.0000	0.0027	0.0000	0.0000	0.0000	0.0000	0.0000	0.0000	0.0000
OTU_893	O_Polyporales	0.0000	0.0000	0.0000	0.0000	0.0000	0.0000	0.0000	0.0000	0.0000	0.0000	0.0000	0.0000	0.0000	0.0061	0.0000	0.0000	0.0000	0.0000	0.0000	0.0000	0.0000	0.0049	0.0044	0.0000	0.0000	0.0000	0.0000	0.0000	0.0023	0.0000	0.0009	0.0000
OTU_894	D_Fungi	0.0159	0.0000	0.0000	0.0013	0.0011	0.0000	0.0008	0.0032	0.0090	0.0000	0.0019	0.0027	0.0026	0.0024	0.0000	0.0000	0.0154	0.0020	0.0027	0.0015	0.0015	0.0000	0.0044	0.0015	0.0027	0.0000	0.0000	0.0010	0.0000	0.0020	0.0027	0.0000
OTU_895	D_Fungi	0.0000	0.0000	0.0000	0.0000	0.0000	0.0000	0.0000	0.0000	0.0010	0.0000	0.0028	0.0000	0.0000	0.0000	0.0009	0.0214	0.0000	0.0000	0.0000	0.0000	0.0000	0.0000	0.0000	0.0000	0.0000	0.0000	0.0136	0.0010	0.0000	0.0000	0.0009	0.0000
OTU_896	G_Oidiodendron	0.0109	0.0000	0.0000	0.0000	0.0000	0.0019	0.0000	0.0000	0.0000	0.0000	0.0000	0.0000	0.0000	0.0000	0.0009	0.0071	0.0000	0.0020	0.0013	0.0060	0.0000	0.0012	0.0029	0.0045	0.0000	0.0000	0.0034	0.0010	0.0000	0.0000	0.0036	0.0000
OTU_897	F_Tubeufiaceae	0.0010	0.0000	0.0012	0.0000	0.0000	0.0000	0.0000	0.0000	0.0010	0.0000	0.0019	0.0027	0.0233	0.0000	0.0000	0.0184	0.0066	0.0010	0.0795	0.0060	0.0000	0.0000	0.0088	0.0179	0.0000	0.0000	0.0051	0.0076	0.0000	0.0000	0.0009	0.0076
OTU_898	F_Glomeraceae	0.0000	0.0000	0.0000	0.0000	0.0000	0.0000	0.0000	0.0011	0.0080	0.0000	0.0000	0.0000	0.0000	0.0000	0.0036	0.0000	0.0000	0.0000	0.0000	0.0000	0.0000	0.0000	0.0000	0.0000	0.0014	0.0000	0.0000	0.0000	0.0000	0.0000	0.0000	0.0209
OTU_899	D_Fungi	0.0040	0.0009	0.0000	0.0000	0.0011	0.0000	0.0000	0.0022	0.0030	0.0000	0.0000	0.0000	0.0000	0.0000	0.0000	0.0031	0.0165	0.0010	0.0000	0.0000	0.0000	0.0000	0.0000	0.0000	0.0014	0.0000	0.0000	0.0000	0.0000	0.0010	0.0000	0.0095
OTU_900	D_Fungi	0.0000	0.0000	0.0000	0.0000	0.0000	0.0000	0.0000	0.0000	0.0040	0.0000	0.0000	0.0000	0.0000	0.0000	0.0000	0.0000	0.0000	0.0000	0.0000	0.0000	0.0000	0.0000	0.0000	0.0030	0.0014	0.0031	0.0000	0.0010	0.0023	0.0000	0.0000	0.0019
OTU_901	D_Fungi	0.0000	0.0000	0.0000	0.0000	0.0000	0.0000	0.0000	0.0000	0.0000	0.0000	0.0037	0.0013	0.0000	0.0000	0.0000	0.0000	0.0000	0.0000	0.0000	0.0015	0.0000	0.0000	0.0000	0.0000	0.0027	0.0016	0.0000	0.0000	0.0364	0.0118	0.0000	0.0000
OTU_902	O_Agaricales	0.0000	0.0009	0.0000	0.0000	0.0000	0.0000	0.0000	0.0000	0.0000	0.0099	0.0000	0.0000	0.0078	0.0012	0.0054	0.0000	0.0000	0.0000	0.0000	0.0000	0.0000	0.0000	0.0000	0.0000	0.0000	0.0000	0.0000	0.0010	0.0000	0.0000	0.0009	0.0000
OTU_903	P_Basidiomycota	0.0000	0.0000	0.0000	0.0000	0.0000	0.0000	0.0000	0.0000	0.0070	0.0000	0.5595	0.0013	0.0013	0.0000	0.0054	0.0479	0.0000	0.0000	0.0000	0.0015	0.0000	0.0000	0.0000	0.0105	0.0000	0.0000	0.0390	0.0000	0.0000	0.0000	0.0000	0.0000
OTU_904	D_Fungi	0.0069	0.0000	0.0000	0.0000	0.0011	0.0010	0.0008	0.0054	0.0040	0.0012	0.0000	0.0013	0.0000	0.0024	0.0000	0.0000	0.0066	0.0020	0.0027	0.0015	0.0015	0.0012	0.0015	0.0030	0.0027	0.0016	0.0000	0.0010	0.0000	0.0020	0.0000	0.0038
OTU_905	G_Conocybe	0.0000	0.0000	0.0000	0.0000	0.0000	0.0000	0.0000	0.0000	0.0000	0.0000	0.0000	0.0000	0.0000	0.0000	0.0000	0.0000	0.0780	0.0000	0.0000	0.0000	0.0044	0.0000	0.0000	0.0030	0.0408	0.1081	0.0051	0.0000	0.0000	0.0000	0.0027	0.0000
OTU_906	D_Fungi	0.0020	0.0009	0.0000	0.0000	0.0000	0.0000	0.0000	0.0043	0.0060	0.0000	0.0000	0.0000	0.0000	0.0000	0.0000	0.0010	0.0110	0.0000	0.0000	0.0000	0.0000	0.0000	0.0000	0.0000	0.0027	0.0000	0.0017	0.0000	0.0000	0.0000	0.0000	0.0076
OTU_907	C_Tremellomycetes	0.0000	0.0000	0.0000	0.0000	0.0000	0.0000	0.0000	0.0000	0.0000	0.0037	0.0000	0.0000	0.0000	0.0000	0.0134	0.0000	0.0000	0.0000	0.0000	0.0000	0.0000	0.0000	0.0000	0.0000	0.0000	0.0000	0.0000	0.0000	0.0000	0.0000	0.0000	0.0000
OTU_908	G_Typhula	0.0030	0.0000	0.0000	0.0000	0.0000	0.0029	0.0000	0.0000	0.0000	0.0000	0.0000	0.0000	0.0000	0.0000	0.0125	0.0000	0.0000	0.0000	0.0000	0.0283	0.0000	0.0111	0.0000	0.0000	0.0000	0.0016	0.0034	0.0707	0.0034	0.0000	0.0045	0.0000
OTU_909	D_Fungi	0.0000	0.0000	0.0000	0.0000	0.0000	0.0000	0.0000	0.0000	0.0000	0.0000	0.0000	0.0000	0.0000	0.0000	0.0000	0.0000	0.0000	0.0000	0.0000	0.0000	0.0000	0.0000	0.0015	0.0000	0.0041	0.0031	0.0085	0.0038	0.0000	0.0000	0.0000	0.0000
OTU_910	D_Fungi	0.0000	0.0000	0.0000	0.0000	0.0000	0.0000	0.0000	0.0000	0.0000	0.0037	0.0000	0.0000	0.0013	0.0012	0.0466	0.0010	0.0000	0.0000	0.0000	0.0000	0.0000	0.0000	0.0000	0.0000	0.0000	0.0000	0.0000	0.0000	0.0000	0.0000	0.0000	0.0000
OTU_911	C_Agaricomycetes	0.0000	0.0000	0.0000	0.0000	0.0022	0.0000	0.0000	0.0000	0.0000	0.0000	0.0000	0.0000	0.0000	0.0000	0.0000	0.0000	0.0132	0.0080	0.0471	0.0015	0.0000	0.0074	0.0044	0.0105	0.0000	0.0000	0.0000	0.0000	0.0000	0.0000	0.0000	0.0000
OTU_912	D_Fungi	0.0000	0.0000	0.0000	0.0000	0.0000	0.0000	0.0000	0.0000	0.0010	0.0025	0.0000	0.0000	0.0013	0.0000	0.0009	0.0051	0.0000	0.0000	0.0000	0.0000	0.0000	0.0000	0.0044	0.0000	0.0095	0.0000	0.0017	0.0010	0.0000	0.0030	0.0000	0.0000
OTU_913	D_Fungi	0.0000	0.0000	0.0000	0.0000	0.0000	0.0000	0.0000	0.0000	0.0000	0.0000	0.0000	0.0000	0.0000	0.0000	0.0529	0.0051	0.0000	0.0000	0.0000	0.0000	0.0000	0.0000	0.0000	0.0000	0.0000	0.0031	0.0000	0.0038	0.0045	0.0000	0.0000	0.0000
OTU_914	D_Fungi	0.0000	0.0000	0.0000	0.0000	0.0000	0.0000	0.0008	0.0000	0.0120	0.0012	0.0000	0.0000	0.0233	0.0000	0.0242	0.0184	0.0000	0.0000	0.0000	0.0000	0.0000	0.0000	0.0000	0.0000	0.0000	0.0000	0.0000	0.0000	0.0000	0.0000	0.0000	0.0000
OTU_915	G_Crocicreas	0.0000	0.0000	0.0000	0.0000	0.0000	0.0000	0.0000	0.0000	0.0000	0.0000	0.0000	0.1654	0.0000	0.0000	0.1497	0.0000	0.0022	0.0010	0.0633	0.0119	0.0000	0.0000	0.0029	0.0000	0.0000	0.0000	0.0068	0.0000	0.0023	0.0010	0.0000	0.0019
OTU_916	G_Psathyrella	0.0010	0.0009	0.0000	0.0000	0.0011	0.0010	0.0008	0.0000	0.0100	0.0012	0.0037	0.0000	0.0000	0.0000	0.0000	0.0000	0.0011	0.0020	0.0013	0.0015	0.0015	0.0012	0.0073	0.0030	0.0014	0.0063	0.0102	0.0000	0.0068	0.0049	0.0072	0.0019
OTU_917	D_Fungi	0.0050	0.0009	0.0000	0.0013	0.0011	0.0010	0.0000	0.0022	0.0000	0.0012	0.0019	0.0000	0.0052	0.0024	0.0018	0.0000	0.0022	0.0000	0.0027	0.0015	0.0029	0.0025	0.0015	0.0015	0.0027	0.0000	0.0017	0.0000	0.0000	0.0000	0.0000	0.0038
OTU_918	D_Fungi	0.0000	0.0000	0.0000	0.0000	0.0000	0.0000	0.0000	0.0000	0.0000	0.0000	0.0000	0.0000	0.0168	0.0000	0.0197	0.0010	0.0000	0.0000	0.0000	0.0000	0.0000	0.0000	0.0000	0.0000	0.0000	0.0000	0.0000	0.0000	0.0034	0.0000	0.0009	0.0000
OTU_919	D_Fungi	0.0000	0.0000	0.0000	0.0000	0.0000	0.0000	0.0000	0.0000	0.0000	0.0000	0.0000	0.0000	0.0000	0.0000	0.0000	0.0000	0.0000	0.0000	0.0000	0.0000	0.0000	0.0000	0.0000	0.0000	0.0000	0.0016	0.0017	0.0000	0.0477	0.0000	0.0036	0.0019
OTU_920	G_Leucosporidiella	0.0000	0.0000	0.0000	0.0025	0.0011	0.0000	0.0000	0.0000	0.0010	0.0000	0.0000	0.0000	0.0000	0.0000	0.0000	0.0000	0.0022	0.0020	0.0000	0.0000	0.0058	0.0000	0.0044	0.0030	0.0068	0.0000	0.0017	0.0000	0.0182	0.0010	0.0018	0.0019
OTU_921	D_Fungi	0.0000	0.0000	0.0000	0.0000	0.0000	0.0000	0.0000	0.0000	0.0000	0.0000	0.0028	0.0000	0.0000	0.0000	0.0027	0.0000	0.0000	0.0000	0.0000	0.0045	0.0000	0.0000	0.0000	0.0000	0.0000	0.0000	0.0000	0.0010	0.0000	0.0000	0.0000	0.0000
OTU_922	G_Claroideoglomus	0.0000	0.0000	0.0000	0.0000	0.0000	0.0000	0.0000	0.0000	0.0040	0.0000	0.0000	0.0000	0.0155	0.0000	0.0036	0.0000	0.0000	0.0000	0.0000	0.0000	0.0000	0.0000	0.0015	0.0000	0.0000	0.0000	0.0000	0.0000	0.0011	0.0000	0.0000	0.0000
OTU_923	D_Fungi	0.0059	0.0000	0.0000	0.0000	0.0011	0.0010	0.0017	0.0011	0.0020	0.0025	0.0000	0.0000	0.0000	0.0012	0.0009	0.0010	0.0055	0.0000	0.0000	0.0000	0.0000	0.0000	0.0000	0.0000	0.0014	0.0000	0.0017	0.0019	0.0000	0.0010	0.0000	0.0019
OTU_924	F_Piptocephalidaceae	0.0000	0.0000	0.0000	0.0025	0.0000	0.0000	0.0000	0.0000	0.0050	0.0062	0.0009	0.0013	0.0039	0.0037	0.0000	0.0000	0.0000	0.0000	0.0000	0.0000	0.0000	0.0000	0.0000	0.0000	0.0000	0.0094	0.0034	0.0038	0.0000	0.0000	0.0000	0.0019
OTU_925	D_Fungi	0.0000	0.0000	0.0000	0.0000	0.0000	0.0000	0.0000	0.0000	0.0130	0.0000	0.0000	0.0000	0.0000	0.0000	0.0018	0.0000	0.0011	0.0000	0.0013	0.0223	0.0000	0.0012	0.0029	0.5847	0.0000	0.2255	0.0085	0.0048	0.0000	0.0020	0.0000	0.0057
OTU_926	D_Fungi	0.0000	0.0000	0.0000	0.0000	0.0000	0.0000	0.0000	0.0000	0.0000	0.0000	0.0009	0.0000	0.0000	0.0000	0.0045	0.0041	0.0000	0.0000	0.0000	0.0000	0.0000	0.0000	0.0000	0.0000	0.0000	0.0000	0.0000	0.0000	0.0000	0.0000	0.0000	0.0000
OTU_927	D_Fungi	0.0000	0.0009	0.0000	0.0000	0.0000	0.0000	0.0000	0.0000	0.0000	0.0000	0.0000	0.0000	0.0414	0.0024	0.0009	0.0010	0.0000	0.0000	0.0000	0.0000	0.0000	0.0000	0.0000	0.0254	0.0000	0.0000	0.0000	0.0000	0.0000	0.0000	0.0000	0.0019
OTU_928	D_Fungi	0.0050	0.0000	0.0000	0.0000	0.0000	0.0019	0.0017	0.0011	0.0030	0.0000	0.0000	0.0000	0.0000	0.0000	0.0000	0.0000	0.0066	0.0000	0.0013	0.0000	0.0029	0.0000	0.0015	0.0000	0.0000	0.0000	0.0000	0.0000	0.0000	0.0000	0.0000	0.0000
OTU_929	G_Tilletiopsis	0.0010	0.0000	0.0012	0.0013	0.0011	0.0000	0.0000	0.0000	0.0010	0.0000	0.0019	0.0000	0.0026	0.0012	0.0018	0.0000	0.0000	0.0000	0.0000	0.0030	0.0000	0.0000	0.0000	0.0000	0.0000	0.0016	0.0017	0.0010	0.0000	0.0000	0.0000	0.0000
OTU_930	G_Cladosporium	0.0000	0.0000	0.0000	0.0000	0.0000	0.0000	0.0000	0.0000	0.0020	0.0000	0.0000	0.0000	0.0013	0.0049	0.0009	0.0000	0.0000	0.0000	0.0013	0.0000	0.0000	0.0000	0.0000	0.0000	0.0000	0.0000	0.0000	0.0000	0.0000	0.0000	0.0000	0.0000
OTU_931	D_Fungi	0.0010	0.0000	0.0000	0.0013	0.0022	0.0010	0.0059	0.0054	0.0000	0.0000	0.0000	0.0000	0.0000	0.0000	0.0000	0.0000	0.0088	0.0030	0.0283	0.0179	0.0058	0.0049	0.0175	0.0434	0.0014	0.0000	0.0000	0.0000	0.0000	0.0000	0.0009	0.0019
OTU_932	C_Agaricomycetes	0.0000	0.0000	0.0000	0.0000	0.0056	0.0038	0.0050	0.0000	0.0000	0.0000	0.0037	0.0000	0.0000	0.0000	0.0000	0.0000	0.0000	0.0010	0.0000	0.0000	0.0000	0.0012	0.0015	0.0000	0.0000	0.0000	0.0000	0.0000	0.0000	0.0000	0.0000	0.0000
OTU_933	D_Fungi	0.0000	0.0000	0.0000	0.0013	0.0000	0.0000	0.0000	0.0086	0.0070	0.0000	0.0000	0.0000	0.0000	0.0012	0.0000	0.0000	0.0000	0.0000	0.0000	0.0000	0.0000	0.0000	0.0000	0.0000	0.0014	0.0000	0.0000	0.0000	0.0000	0.0000	0.0000	0.0000
OTU_934	D_Fungi	0.0010	0.0000	0.0000	0.0000	0.0111	0.0000	0.0017	0.0000	0.0000	0.0000	0.0000	0.0000	0.0000	0.0000	0.0000	0.0000	0.0000	0.0000	0.0000	0.0000	0.0029	0.0000	0.0000	0.0000	0.0000	0.0000	0.0000	0.0000	0.0000	0.0069	0.0000	0.0000
OTU_935	G_Volvopluteus	0.0010	0.0009	0.0000	0.0025	0.0000	0.0000	0.0050	0.0000	0.0000	0.0000	0.0009	0.0000	0.0013	0.0012	0.0000	0.0000	0.0044	0.0010	0.0000	0.0060	0.0058	0.0037	0.0102	0.0045	0.0000	0.0047	0.0000	0.0000	0.0011	0.0010	0.0000	0.0000
OTU_936	G_Ramicandelaber	0.0040	0.0000	0.0012	0.0000	0.0022	0.0000	0.0025	0.0043	0.0030	0.0037	0.0000	0.0000	0.0000	0.0012	0.0009	0.0031	0.0044	0.0000	0.0013	0.0030	0.0015	0.0012	0.0029	0.0015	0.0014	0.0031	0.0017	0.0019	0.0000	0.0039	0.0027	0.0019
OTU_937	D_Fungi	0.0000	0.0000	0.0000	0.0000	0.0000	0.0000	0.0000	0.0000	0.0320	0.0000	0.0000	0.0444	0.0052	0.0000	0.0000	0.0000	0.0000	0.0000	0.0000	0.0000	0.0000	0.0000	0.0000	0.0045	0.0000	0.0000	0.0000	0.0029	0.0000	0.0000	0.0000	0.0019
OTU_938	D_Fungi	0.0040	0.0009	0.0012	0.0013	0.0011	0.0038	0.0050	0.0054	0.0050	0.0025	0.0019	0.0027	0.0000	0.0024	0.0027	0.0010	0.0055	0.0040	0.0000	0.0015	0.0000	0.0000	0.0000	0.0000	0.0000	0.0000	0.0000	0.0010	0.0000	0.0020	0.0000	0.0019
OTU_939	D_Fungi	0.0040	0.0000	0.0000	0.0000	0.0067	0.0019	0.0084	0.0011	0.0030	0.0000	0.0009	0.0000	0.0000	0.0000	0.0000	0.0000	0.0011	0.0020	0.0000	0.0000	0.0087	0.0037	0.0088	0.0778	0.0000	0.0000	0.0017	0.0000	0.0000	0.0000	0.0000	0.0000
OTU_940	D_Fungi	0.0020	0.0019	0.0012	0.0025	0.0011	0.0010	0.0025	0.0011	0.0000	0.0000	0.0000	0.0000	0.0000	0.0000	0.0000	0.0000	0.0022	0.0010	0.0000	0.0000	0.0000	0.0000	0.0000	0.0000	0.0000	0.0000	0.0000	0.0000	0.0000	0.0000	0.0000	0.0000
OTU_941	D_Fungi	0.0089	0.0000	0.0000	0.0013	0.0011	0.0010	0.0017	0.0043	0.0000	0.0012	0.0000	0.0000	0.0000	0.0000	0.0000	0.0000	0.0044	0.0000	0.0000	0.0000	0.0015	0.0000	0.0000	0.0000	0.0014	0.0000	0.0000	0.0000	0.0000	0.0000	0.0000	0.0000
OTU_942	G_Arthrobotrys	0.0000	0.0009	0.0024	0.0025	0.0011	0.0019	0.0017	0.0237	0.0000	0.0000	0.0009	0.0000	0.0013	0.0049	0.0009	0.0010	0.0022	0.0020	0.0027	0.0060	0.0000	0.0025	0.0321	0.0105	0.0109	0.0016	0.0017	0.0010	0.0023	0.0020	0.0118	0.0000
OTU_943	P_Ascomycota	0.0010	0.0000	0.0000	0.0013	0.0000	0.0000	0.0000	0.0000	0.0010	0.0000	0.0019	0.0000	0.0000	0.0012	0.0009	0.0000	0.0000	0.0000	0.0000	0.0000	0.0102	0.0111	0.0058	0.0075	0.0000	0.0000	0.0000	0.0010	0.0000	0.0010	0.0027	0.0000
OTU_944	P_Glomeromycota	0.0000	0.0000	0.0000	0.0000	0.0022	0.0010	0.0025	0.0075	0.0000	0.0000	0.0000	0.0000	0.0013	0.0012	0.0018	0.0010	0.0000	0.0000	0.0013	0.0000	0.0000	0.0000	0.0044	0.0000	0.0000	0.0000	0.0000	0.0000	0.0000	0.0000	0.0000	0.0000
OTU_945	C_Glomeromycetes	0.0000	0.0000	0.0000	0.0000	0.0000	0.0000	0.0000	0.0075	0.0000	0.0000	0.0000	0.0013	0.0000	0.0049	0.0000	0.0000	0.0000	0.0000	0.0000	0.0000	0.0000	0.0000	0.0029	0.0000	0.0000	0.0000	0.0000	0.0000	0.0000	0.0010	0.0000	0.0000
OTU_946	G_Microdochium	0.0000	0.0000	0.0000	0.0089	0.0000	0.0000	0.0059	0.0119	0.0000	0.0000	0.0000	0.0000	0.0000	0.0000	0.0000	0.0000	0.0011	0.0000	0.0000	0.0000	0.0000	0.0000	0.0000	0.0000	0.0000	0.0000	0.0000	0.0000	0.0000	0.0000	0.0000	0.0000
OTU_947	D_Fungi	0.0010	0.0000	0.0000	0.0000	0.0000	0.0000	0.0000	0.0000	0.0000	0.0025	0.0019	0.0000	0.0000	0.0000	0.0000	0.0020	0.0055	0.0010	0.0013	0.0000	0.0000	0.0000	0.0000	0.0015	0.0041	0.0000	0.0000	0.0000	0.0000	0.0010	0.0000	0.0000
OTU_948	C_Agaricomycetes	0.0010	0.0084	0.0012	0.0013	0.0000	0.0019	0.0017	0.0205	0.0000	0.0025	0.0000	0.0000	0.0000	0.0073	0.0000	0.0000	0.0088	0.0169	0.0040	0.0089	0.0116	0.0000	0.0073	0.0105	0.0054	0.4933	0.1034	0.0926	0.0420	0.0020	0.0018	0.0000
OTU_949	F_Mortierellaceae	0.0000	0.0000	0.0000	0.0000	0.0000	0.0000	0.0000	0.0000	0.0000	0.0000	0.0308	0.0081	0.0000	0.0000	0.0000	0.0010	0.0000	0.0000	0.0027	0.0000	0.0000	0.0000	0.0015	0.0000	0.0000	0.0000	0.0000	0.0000	0.0000	0.0000	0.0009	0.0000
OTU_950	D_Fungi	0.0000	0.0000	0.0000	0.0000	0.0000	0.0010	0.0000	0.0000	0.0000	0.0025	0.0019	0.0000	0.0000	0.0012	0.0000	0.0000	0.0000	0.0000	0.0000	0.0015	0.0000	0.0012	0.0000	0.0000	0.0014	0.0016	0.0000	0.0019	0.0000	0.0030	0.0009	0.0000
OTU_951	D_Fungi	0.0000	0.0000	0.0000	0.0000	0.0000	0.0000	0.0000	0.0000	0.0560	0.0025	0.0009	0.0323	0.0000	0.0000	0.0000	0.0020	0.0000	0.0000	0.0000	0.0000	0.0000	0.0000	0.0000	0.0000	0.0000	0.0000	0.0000	0.0000	0.0000	0.0000	0.0000	0.0000
OTU_952	G_Absidia	0.0129	0.0019	0.0012	0.0013	0.0011	0.0010	0.0034	0.0011	0.0030	0.0000	0.0009	0.0027	0.0013	0.0000	0.0000	0.0000	0.0077	0.0080	0.0054	0.0000	0.0058	0.0025	0.0029	0.0165	0.0299	0.0110	0.0051	0.0057	0.0045	0.0010	0.0018	0.0038
OTU_953	G_Diversispora	0.0000	0.0000	0.0000	0.0000	0.0000	0.0000	0.0000	0.0011	0.0010	0.0000	0.0634	0.0000	0.0000	0.0000	0.0018	0.0000	0.0000	0.0000	0.0000	0.0000	0.0000	0.0037	0.0000	0.0000	0.0136	0.0000	0.0000	0.0143	0.0023	0.0000	0.0063	0.0000
OTU_954	G_Leptospora	0.0000	0.0000	0.0000	0.0013	0.0000	0.0000	0.0000	0.0022	0.0000	0.0000	0.0000	0.0000	0.0000	0.0000	0.0009	0.0000	0.0000	0.0000	0.0013	0.0000	0.0174	0.0381	0.0000	0.0000	0.0014	0.0000	0.0000	0.0000	0.0000	0.0010	0.0000	0.0000
OTU_955	D_Fungi	0.0000	0.0000	0.0000	0.0000	0.0000	0.0000	0.0017	0.0000	0.0000	0.0012	0.0009	0.0000	0.0000	0.0000	0.0045	0.0000	0.0000	0.0000	0.0013	0.0000	0.0015	0.0000	0.0015	0.0030	0.0000	0.0000	0.0000	0.0000	0.0000	0.0010	0.0018	0.0000
OTU_956	D_Fungi	0.0040	0.0009	0.0012	0.0000	0.0022	0.0019	0.0017	0.0032	0.0010	0.0062	0.0000	0.0000	0.0026	0.0000	0.0009	0.0010	0.0022	0.0010	0.0000	0.0000	0.0015	0.0012	0.0015	0.0000	0.0041	0.0000	0.0000	0.0000	0.0000	0.0010	0.0018	0.0000
OTU_957	G_Neosetophoma	0.0000	0.0000	0.0000	0.0000	0.0000	0.0000	0.0000	0.0183	0.0000	0.0012	0.0000	0.0000	0.0091	0.0012	0.0045	0.0071	0.0000	0.0000	0.0000	0.0000	0.0000	0.0000	0.0000	0.0000	0.0000	0.0000	0.0000	0.0000	0.0000	0.0000	0.0000	0.0000
OTU_958	P_Ascomycota	0.0000	0.0000	0.0000	0.0000	0.0000	0.0000	0.0008	0.0000	0.0120	0.0000	0.0000	0.0054	0.0000	0.0000	0.0018	0.0082	0.0000	0.0000	0.0000	0.0000	0.0044	0.0000	0.0073	0.0000	0.0109	0.0016	0.0017	0.0000	0.0000	0.0000	0.0009	0.0038
OTU_959	D_Fungi	0.0268	0.0000	0.0000	0.0000	0.0000	0.0019	0.0008	0.0194	0.0210	0.0000	0.0000	0.0000	0.0013	0.0012	0.0000	0.0010	0.0143	0.0000	0.0000	0.0045	0.0000	0.0000	0.0000	0.0075	0.0150	0.0000	0.0017	0.0000	0.0000	0.0000	0.0009	0.0057
OTU_960	G_Panaeolus	0.0020	0.0000	0.0000	0.0000	0.0000	0.0000	0.0000	0.0000	0.0010	0.0000	0.0000	0.0000	0.0052	0.0000	0.0000	0.0153	0.0011	0.0010	0.0040	0.0030	0.0015	0.0000	0.0000	0.0000	0.0313	0.0016	0.0034	0.0010	0.0000	0.0000	0.0000	0.0000
OTU_961	G_Schizothecium	0.0000	0.0000	0.0000	0.0000	0.0000	0.0000	0.0000	0.0000	0.0030	0.0000	0.0000	0.0054	0.0000	0.0012	0.0000	0.0082	0.0000	0.0000	0.0000	0.0000	0.0000	0.0000	0.0000	0.0000	0.0014	0.0000	0.0000	0.0000	0.0000	0.0000	0.0000	0.0000
OTU_962	G_Preussia	0.0000	0.0000	0.0000	0.0000	0.0000	0.0000	0.0000	0.0000	0.0000	0.0000	0.0000	0.0000	0.0116	0.0000	0.0081	0.0000	0.0000	0.0000	0.0000	0.0000	0.0000	0.0000	0.0000	0.0000	0.0000	0.0000	0.0000	0.0000	0.0023	0.0000	0.0000	0.0000
OTU_963	O_Pleosporales	0.0000	0.0000	0.0000	0.0000	0.0000	0.0010	0.0000	0.0000	0.0010	0.0000	0.0000	0.0000	0.0026	0.0061	0.0009	0.0000	0.0000	0.0000	0.0000	0.0000	0.0000	0.0000	0.0000	0.0000	0.0000	0.0000	0.0017	0.0000	0.0023	0.0000	0.0000	0.0000
OTU_964	F_Entolomataceae	0.0050	0.0019	0.0000	0.0000	0.0000	0.0000	0.0008	0.0000	0.0010	0.0000	0.0019	0.0000	0.0000	0.0012	0.0063	0.0000	0.0000	0.0000	0.0000	0.0000	0.0000	0.0000	0.0000	0.0000	0.0000	0.0000	0.0000	0.0000	0.0023	0.0000	0.0000	0.0019
OTU_965	G_Diversispora	0.0000	0.0000	0.0000	0.0000	0.0011	0.0000	0.0000	0.0000	0.0010	0.0000	0.0000	0.0000	0.0466	0.0024	0.0350	0.0000	0.0000	0.0508	0.0000	0.0000	0.0000	0.0000	0.0000	0.0000	0.0231	0.0000	0.0000	0.0000	0.0011	0.0000	0.0000	0.0000
OTU_966	D_Fungi	0.0000	0.0000	0.0000	0.0000	0.0000	0.0000	0.0000	0.0000	0.0130	0.0000	0.0009	0.5042	0.0000	0.0012	0.0000	0.1071	0.0000	0.0010	0.0229	0.0000	0.0000	0.0000	0.0000	0.0000	0.0000	0.0000	0.0000	0.0000	0.0000	0.0000	0.0000	0.0000
OTU_967	G_Preussia	0.0020	0.0037	0.0000	0.0013	0.0000	0.0000	0.0008	0.0000	0.0000	0.0025	0.0000	0.0000	0.0000	0.0000	0.0000	0.0020	0.0022	0.0000	0.0013	0.0000	0.0029	0.0000	0.0000	0.0060	0.0122	0.0063	0.0000	0.0029	0.0307	0.0020	0.0081	0.0000
OTU_968	G_Fellomyces	0.0000	0.0000	0.0000	0.0000	0.0000	0.0000	0.0000	0.0000	0.0010	0.0000	0.0000	0.0013	0.0168	0.0000	0.0000	0.0082	0.0000	0.0000	0.0000	0.0000	0.0000	0.0000	0.0000	0.0000	0.0000	0.0000	0.0000	0.0019	0.0000	0.0000	0.0009	0.0000
OTU_969	D_Fungi	0.0000	0.0000	0.0000	0.0000	0.0000	0.0000	0.0000	0.0000	0.0040	0.0012	0.0000	0.0013	0.0000	0.0000	0.0000	0.0010	0.0000	0.0000	0.0000	0.0000	0.0000	0.0000	0.0029	0.0000	0.0027	0.0000	0.0000	0.0000	0.0000	0.0000	0.0000	0.0019
OTU_970	G_Cystofilobasidium	0.0000	0.0000	0.0012	0.0000	0.0000	0.0000	0.0000	0.0000	0.0000	0.0000	0.0009	0.0108	0.0000	0.0024	0.0009	0.0000	0.0022	0.0000	0.0000	0.0030	0.0145	0.0000	0.0029	0.0015	0.0014	0.0000	0.0000	0.0000	0.0000	0.0059	0.0000	0.0019
OTU_971	D_Fungi	0.1279	0.0000	0.0000	0.0038	0.0011	0.0000	0.0000	0.0000	0.0000	0.0000	0.0000	0.0000	0.0000	0.0012	0.0000	0.0000	0.0000	0.0000	0.0000	0.0000	0.0000	0.0086	0.0000	0.0000	0.0000	0.0016	0.0000	0.0010	0.0477	0.0079	0.0290	0.0038
OTU_972	D_Fungi	0.0000	0.0000	0.0000	0.0000	0.0000	0.0000	0.0000	0.0000	0.0000	0.0025	0.0000	0.0054	0.0000	0.0000	0.0018	0.0000	0.0000	0.0000	0.0027	0.0000	0.0000	0.0000	0.0015	0.0030	0.0000	0.0016	0.0034	0.0029	0.0011	0.0020	0.0009	0.0000
OTU_973	D_Fungi	0.0010	0.0000	0.0000	0.0000	0.0000	0.0000	0.0000	0.0000	0.0400	0.0000	0.0000	0.0000	0.0479	0.0049	0.0000	0.0010	0.0000	0.0000	0.0000	0.0000	0.0000	0.0012	0.0000	0.0000	0.0014	0.0031	0.0051	0.0019	0.0000	0.0000	0.0000	0.0019
OTU_974	G_Glomus	0.0000	0.0000	0.0097	0.0000	0.1456	0.0086	0.0909	0.0075	0.1150	0.0000	0.0261	0.0121	0.0311	0.1916	0.0995	0.1713	0.0011	0.0000	0.0081	0.0015	0.0654	0.2235	0.1065	0.0179	0.0000	0.0094	0.0000	0.0057	0.0000	0.0020	0.0063	0.0000
OTU_975	G_Glomus	0.0000	0.0000	0.0012	0.0000	0.0000	0.0000	0.0008	0.0000	0.0590	0.0062	0.0028	0.0013	0.0013	0.0012	0.0036	0.0908	0.0000	0.0000	0.0000	0.0000	0.0000	0.0000	0.0000	0.0000	0.0041	0.0000	0.0000	0.0010	0.0011	0.0010	0.0009	0.0095
OTU_976	G_Pyrenophora	0.0000	0.0000	0.0000	0.0000	0.0000	0.0000	0.0008	0.0000	0.0270	0.0000	0.0056	0.0000	0.0000	0.0000	0.0063	0.0000	0.0000	0.0000	0.0000	0.0000	0.0015	0.0000	0.0044	0.0882	0.0000	0.0000	0.0000	0.0000	0.0068	0.0000	0.0000	0.0000
OTU_977	P_Ascomycota	0.0109	0.0000	0.0012	0.0000	0.0000	0.0010	0.0000	0.0000	0.0000	0.0000	0.0000	0.0000	0.0000	0.0000	0.0000	0.0010	0.0000	0.0000	0.0000	0.0000	0.0000	0.0000	0.0000	0.0000	0.0041	0.0000	0.0000	0.0000	0.0000	0.0000	0.0000	0.0038
OTU_978	D_Fungi	0.0089	0.0000	0.0000	0.0000	0.0000	0.0000	0.0008	0.0108	0.0020	0.0000	0.0000	0.0000	0.0000	0.0000	0.0000	0.0010	0.0011	0.0000	0.0000	0.0000	0.0000	0.0000	0.0000	0.0045	0.0014	0.0000	0.0000	0.0000	0.0000	0.0000	0.0000	0.0019
OTU_979	D_Fungi	0.0000	0.0009	0.0000	0.0000	0.0000	0.0000	0.0000	0.0022	0.0000	0.0000	0.0000	0.0000	0.0000	0.0000	0.0000	0.0000	0.0000	0.0000	0.0000	0.0000	0.0000	0.0000	0.0000	0.0000	0.0000	0.0000	0.0000	0.0000	0.0000	0.0000	0.0000	0.0000
OTU_980	D_Fungi	0.0020	0.0000	0.0012	0.0000	0.0000	0.0000	0.0017	0.0032	0.0010	0.0000	0.0000	0.0000	0.0000	0.0000	0.0000	0.0000	0.0000	0.0000	0.0000	0.0000	0.0000	0.0000	0.0000	0.0000	0.0000	0.0000	0.0000	0.0038	0.0000	0.0000	0.0000	0.0000
OTU_981	D_Fungi	0.0000	0.0000	0.0000	0.0000	0.0011	0.0010	0.0008	0.0032	0.0010	0.0000	0.0000	0.0000	0.0000	0.0000	0.0000	0.0000	0.0011	0.0000	0.0000	0.0000	0.0000	0.0000	0.0000	0.0000	0.0000	0.0000	0.0000	0.0000	0.0000	0.0000	0.0000	0.0000
OTU_982	D_Fungi	0.0050	0.0000	0.0000	0.0000	0.0011	0.0019	0.0008	0.0043	0.0010	0.0000	0.0000	0.0000	0.0000	0.0000	0.0009	0.0000	0.0011	0.0000	0.0000	0.0000	0.0000	0.0000	0.0000	0.0000	0.0014	0.0016	0.0000	0.0000	0.0000	0.0020	0.0000	0.0019
OTU_983	G_Zalerion	0.0000	0.0000	0.0000	0.0000	0.0000	0.0000	0.0000	0.0032	0.0000	0.0000	0.0000	0.0000	0.0000	0.0000	0.0000	0.0000	0.0000	0.0000	0.0000	0.0000	0.0000	0.0000	0.0000	0.0000	0.0000	0.0000	0.0000	0.0000	0.0000	0.0000	0.0000	0.0000
OTU_984	D_Fungi	0.0020	0.0000	0.0000	0.0013	0.0022	0.0010	0.0101	0.0022	0.0010	0.0000	0.0009	0.0000	0.0000	0.0024	0.0009	0.0000	0.0000	0.0000	0.0000	0.0000	0.0015	0.0012	0.0029	0.0015	0.0000	0.0000	0.0000	0.0000	0.0000	0.0030	0.0000	0.0019
OTU_985	D_Fungi	0.0000	0.0000	0.0000	0.0000	0.0000	0.0000	0.0000	0.0043	0.0000	0.0025	0.0000	0.0013	0.0013	0.0000	0.0000	0.0010	0.0000	0.0010	0.0027	0.0015	0.0000	0.0000	0.0000	0.0000	0.0000	0.0000	0.0000	0.0000	0.0000	0.0010	0.0000	0.0000
OTU_986	D_Fungi	0.0010	0.0000	0.0012	0.0013	0.0000	0.0019	0.0000	0.0011	0.0000	0.0000	0.0000	0.0000	0.0000	0.0000	0.0000	0.0000	0.0011	0.0020	0.0027	0.0015	0.0000	0.0012	0.0000	0.0000	0.0014	0.0000	0.0017	0.0000	0.0000	0.0000	0.0000	0.0019
OTU_987	D_Fungi	0.0000	0.0000	0.0000	0.0000	0.0022	0.0114	0.0008	0.0000	0.0000	0.0000	0.0000	0.0000	0.0388	0.0012	0.0000	0.0010	0.0000	0.0000	0.0000	0.0000	0.0000	0.0000	0.0000	0.0000	0.0041	0.0016	0.0000	0.0029	0.0114	0.0030	0.0009	0.0019
OTU_988	D_Fungi	0.0010	0.0019	0.0012	0.0000	0.0011	0.0000	0.0017	0.0022	0.0000	0.0000	0.0000	0.0000	0.0000	0.0012	0.0000	0.0000	0.0022	0.0000	0.0013	0.0000	0.0000	0.0000	0.0000	0.0000	0.0000	0.0000	0.0000	0.0019	0.0000	0.0010	0.0009	0.0000
OTU_989	D_Fungi	0.0000	0.0000	0.0000	0.0000	0.0000	0.0000	0.0000	0.0022	0.0000	0.0000	0.0000	0.0000	0.0000	0.0000	0.0000	0.0000	0.0022	0.0000	0.0000	0.0000	0.0000	0.0000	0.0015	0.0015	0.0014	0.0000	0.0000	0.0000	0.0000	0.0000	0.0000	0.0000
OTU_990	P_Chytridiomycota	0.0000	0.0009	0.0000	0.0000	0.0000	0.0000	0.0000	0.0022	0.0000	0.0012	0.0000	0.0000	0.0000	0.0000	0.0000	0.0000	0.0000	0.0000	0.0000	0.0000	0.0000	0.0000	0.0000	0.0000	0.0000	0.0000	0.0000	0.0000	0.0000	0.0000	0.0000	0.0000
OTU_991	D_Fungi	0.0010	0.0000	0.0000	0.0000	0.0000	0.0000	0.0008	0.0032	0.0010	0.0000	0.0000	0.0000	0.0000	0.0000	0.0000	0.0010	0.0000	0.0000	0.0013	0.0000	0.0000	0.0000	0.0000	0.0000	0.0000	0.0000	0.0000	0.0000	0.0011	0.0020	0.0000	0.0000
OTU_992	P_Ascomycota	0.0000	0.0000	0.0000	0.0000	0.0000	0.0000	0.0000	0.0032	0.0000	0.0000	0.0000	0.0013	0.0000	0.0000	0.0000	0.0000	0.0000	0.0000	0.0000	0.0000	0.0000	0.0000	0.0000	0.0000	0.0000	0.0000	0.0000	0.0000	0.0000	0.0000	0.0000	0.0000
OTU_993	G_Psathyrella	0.0000	0.0112	0.0000	0.0000	0.0000	0.0000	0.0000	0.0000	0.0000	0.0000	0.0000	0.0000	0.0000	0.0000	0.0000	0.0000	0.0000	0.0010	0.0000	0.0000	0.0000	0.0000	0.0000	0.0000	0.0000	0.0000	0.0000	0.0000	0.0000	0.0000	0.0000	0.0000
OTU_994	F_Psathyrellaceae	0.0000	0.0262	0.0000	0.0000	0.0000	0.0000	0.0008	0.0000	0.0000	0.0000	0.0000	0.0000	0.0013	0.0024	0.0000	0.0000	0.0000	0.0000	0.0000	0.0000	0.0000	0.0000	0.0000	0.0000	0.0000	0.0000	0.0068	0.0000	0.0000	0.0000	0.0000	0.0000
OTU_995	D_Fungi	0.0010	0.0000	0.0000	0.0000	0.0000	0.0000	0.0000	0.0032	0.0000	0.0000	0.0000	0.0000	0.0000	0.0000	0.0000	0.0000	0.0011	0.0000	0.0000	0.0000	0.0000	0.0000	0.0000	0.0000	0.0000	0.0000	0.0000	0.0000	0.0000	0.0000	0.0000	0.0000
OTU_996	G_Rhizophagus	0.0059	0.1537	0.0000	0.0013	0.0000	0.0000	0.0042	0.0011	0.0000	0.0000	0.0000	0.0000	0.0013	0.0000	0.0009	0.0010	0.1153	0.0000	0.0000	0.0000	0.0000	0.0000	0.0000	0.0015	0.0000	0.0000	0.0000	0.0000	0.0000	0.0000	0.0000	0.0000
OTU_997	G_Funneliformis	0.0000	0.0000	0.0000	0.0000	0.0000	0.0000	0.0000	0.0032	0.0000	0.0000	0.0000	0.0000	0.0000	0.0000	0.0000	0.0000	0.0000	0.0000	0.0000	0.0000	0.0000	0.0000	0.0088	0.0000	0.0014	0.0000	0.0000	0.0000	0.0000	0.0010	0.0000	0.0000
OTU_998	D_Fungi	0.0000	0.0150	0.0000	0.0000	0.0000	0.0000	0.0000	0.0000	0.0000	0.0000	0.0000	0.0000	0.0000	0.0000	0.0000	0.0000	0.0000	0.0000	0.0013	0.0000	0.0000	0.0000	0.0015	0.0000	0.0068	0.0000	0.0000	0.0000	0.0682	0.0000	0.0009	0.0000
OTU_999	D_Fungi	0.0000	0.0000	0.0000	0.0000	0.0000	0.0000	0.0000	0.0043	0.0000	0.0000	0.0000	0.0000	0.0000	0.0000	0.0000	0.0000	0.0000	0.0000	0.0000	0.0000	0.0000	0.0000	0.0000	0.0000	0.0014	0.0000	0.0000	0.0000	0.0000	0.0000	0.0000	0.0000
OTU_1000	D_Fungi	0.0000	0.0000	0.0000	0.0000	0.0000	0.0010	0.0000	0.0022	0.0000	0.0000	0.0000	0.0000	0.0000	0.0000	0.0000	0.0000	0.0000	0.0000	0.0000	0.0000	0.0000	0.0000	0.0000	0.0000	0.0000	0.0000	0.0000	0.0000	0.0000	0.0000	0.0000	0.0000
OTU_1001	G_Conocybe	0.0020	0.0141	0.0000	0.0000	0.0000	0.0000	0.0000	0.0022	0.0000	0.0000	0.0028	0.0000	0.0000	0.0000	0.0000	0.0000	0.0000	0.0000	0.0067	0.0000	0.0015	0.0012	0.0058	0.0000	0.0014	0.0016	0.0000	0.0000	0.0000	0.0049	0.0009	0.0019
OTU_1002	F_Pyronemataceae	0.0000	0.0796	0.0012	0.0013	0.0011	0.0000	0.0000	0.0000	0.0000	0.0000	0.0000	0.0000	0.0000	0.0000	0.0009	0.0000	0.0000	0.0000	0.0256	0.0000	0.0000	0.0000	0.0000	0.0000	0.0000	0.0000	0.0017	0.0000	0.0000	0.0020	0.2572	0.0000
OTU_1003	D_Fungi	0.0000	0.0000	0.0000	0.0000	0.0011	0.0019	0.0000	0.0000	0.0000	0.0000	0.0000	0.0000	0.0000	0.0000	0.0000	0.0000	0.0000	0.0000	0.0000	0.0000	0.0000	0.0000	0.0000	0.0000	0.0000	0.0000	0.0000	0.0000	0.0000	0.0000	0.0000	0.0000
OTU_1004	G_Claroideoglomus	0.0000	0.0000	0.0000	0.0000	0.0000	0.0333	0.0000	0.0000	0.0000	0.0000	0.0000	0.0000	0.0000	0.0000	0.0000	0.0000	0.0000	0.0000	0.0000	0.0000	0.0044	0.0000	0.0000	0.0000	0.0000	0.0000	0.0000	0.0000	0.0000	0.0000	0.0018	0.0000
OTU_1005	F_Glomeraceae	0.0000	0.0019	0.0000	0.0000	0.0000	0.0314	0.0000	0.0043	0.0000	0.0000	0.0000	0.0000	0.0116	0.0000	0.0000	0.0000	0.0000	0.0000	0.0000	0.0000	0.0000	0.0000	0.0000	0.0000	0.0000	0.0000	0.0000	0.0000	0.0011	0.0000	0.0000	0.0000
OTU_1006	P_Ascomycota	0.0000	0.0000	0.0000	0.0000	0.0000	0.0228	0.0017	0.0000	0.0000	0.0000	0.0000	0.0000	0.0000	0.0000	0.0000	0.0000	0.0000	0.0000	0.0000	0.0000	0.0000	0.0000	0.0000	0.0000	0.0000	0.0000	0.0000	0.0000	0.0000	0.0000	0.0000	0.0284
OTU_1007	P_Ascomycota	0.0010	0.0000	0.0000	0.0000	0.0000	0.0067	0.0000	0.0000	0.0000	0.0000	0.0000	0.0000	0.0000	0.0012	0.0009	0.0000	0.0000	0.0000	0.0000	0.0000	0.0000	0.0000	0.0000	0.0000	0.0000	0.0000	0.0000	0.0000	0.0000	0.0000	0.0000	0.0000
OTU_1008	D_Fungi	0.0000	0.0000	0.0000	0.0000	0.0000	0.0057	0.0000	0.0000	0.0000	0.0000	0.0000	0.0000	0.0000	0.0000	0.0000	0.0000	0.0000	0.0000	0.0000	0.0000	0.0000	0.0000	0.0000	0.0000	0.0000	0.0000	0.0000	0.0000	0.0000	0.0000	0.0000	0.0000
OTU_1009	G_Tricharina	0.0000	0.0000	0.0000	0.0000	0.0000	0.0086	0.0000	0.0000	0.0000	0.0000	0.0000	0.0000	0.0000	0.0012	0.0000	0.0000	0.0000	0.0000	0.0000	0.0000	0.0000	0.0000	0.0000	0.0000	0.0000	0.0000	0.0000	0.0000	0.0000	0.0000	0.0000	0.0000
OTU_1010	P_Ascomycota	0.0000	0.0000	0.0000	0.0000	0.0011	0.0048	0.0008	0.0000	0.0000	0.0012	0.0000	0.0000	0.0000	0.0000	0.0000	0.0000	0.0044	0.0000	0.0013	0.0015	0.0087	0.0012	0.0015	0.0030	0.0000	0.0000	0.0000	0.0000	0.0000	0.0000	0.0009	0.0019
OTU_1011	O_Helotiales	0.0000	0.0000	0.0000	0.0000	0.0000	0.0029	0.0000	0.0000	0.0000	0.0000	0.0000	0.0000	0.0013	0.0000	0.0000	0.0010	0.0000	0.0000	0.0013	0.0000	0.0000	0.0000	0.0000	0.0000	0.0000	0.0000	0.0000	0.0010	0.5522	0.0010	0.0000	0.0000
OTU_1012	P_Ascomycota	0.0000	0.0000	0.0000	0.0000	0.0011	0.0048	0.0000	0.0000	0.0000	0.0000	0.0000	0.0000	0.0013	0.0000	0.0000	0.0000	0.0000	0.0000	0.0000	0.0060	0.0073	0.0025	0.0117	0.0015	0.0000	0.0000	0.0000	0.0000	0.0000	0.0000	0.0000	0.0247
OTU_1013	D_Fungi	0.0000	0.0000	0.0000	0.0000	0.0000	0.0048	0.0008	0.0000	0.0010	0.0025	0.0009	0.0000	0.0000	0.0000	0.0000	0.0000	0.0000	0.0000	0.0377	0.0298	0.0000	0.0000	0.0015	0.0060	0.0000	0.0000	0.0000	0.0019	0.0000	0.0000	0.0000	0.0000
OTU_1014	G_Preussia	0.0000	0.0000	0.0000	0.0000	0.0000	0.0095	0.0673	0.0000	0.0000	0.0000	0.0009	0.0000	0.0000	0.0000	0.0009	0.0000	0.0000	0.0000	0.0000	0.0000	0.0000	0.0000	0.0029	0.0015	0.0054	0.0000	0.0000	0.0000	0.0000	0.0010	0.0000	0.0000
OTU_1015	G_Rhizoctonia	0.0000	0.0000	0.0000	0.0000	0.0000	0.0048	0.0008	0.0000	0.0000	0.0000	0.0000	0.0000	0.0000	0.0000	0.0000	0.0000	0.0000	0.0000	0.0000	0.0000	0.0000	0.0000	0.0000	0.0000	0.0000	0.0000	0.0000	0.0000	0.0000	0.0000	0.0000	0.0000
OTU_1016	D_Fungi	0.0000	0.0000	0.0000	0.0000	0.0000	0.0019	0.0000	0.0000	0.0000	0.0000	0.0000	0.0000	0.0000	0.0000	0.0000	0.0000	0.0000	0.0000	0.0000	0.0000	0.0000	0.0000	0.0000	0.0000	0.0000	0.0000	0.0000	0.0000	0.0000	0.0000	0.0000	0.0000
OTU_1017	C_Sordariomycetes	0.0000	0.0000	0.0000	0.0000	0.0000	0.0038	0.0000	0.0011	0.0000	0.0000	0.0000	0.0000	0.0000	0.0000	0.0000	0.0000	0.0000	0.0000	0.0000	0.0000	0.0000	0.0000	0.0000	0.0000	0.0000	0.0000	0.0000	0.0000	0.0000	0.0020	0.0000	0.0000
OTU_1018	D_Fungi	0.0000	0.0000	0.0000	0.0000	0.0000	0.0019	0.0000	0.0000	0.0000	0.0000	0.0000	0.0000	0.0000	0.0000	0.0000	0.0000	0.0000	0.0000	0.0000	0.0000	0.0000	0.0000	0.0000	0.0000	0.0000	0.0000	0.0000	0.0000	0.0000	0.0010	0.0000	0.0000
OTU_1019	D_Fungi	0.0030	0.0009	0.0000	0.0013	0.0000	0.0019	0.0008	0.0022	0.0010	0.0000	0.0000	0.0000	0.0000	0.0000	0.0000	0.0000	0.0022	0.0000	0.0000	0.0000	0.0000	0.0000	0.0000	0.0000	0.0000	0.0000	0.0000	0.0010	0.0000	0.0020	0.0000	0.0000
OTU_1020	D_Fungi	0.0000	0.0000	0.0000	0.0000	0.0011	0.0029	0.0000	0.0000	0.0000	0.0000	0.0000	0.0000	0.0000	0.0000	0.0000	0.0000	0.0000	0.0000	0.0000	0.0000	0.0000	0.0000	0.0000	0.0000	0.0000	0.0000	0.0000	0.0000	0.0000	0.0000	0.0000	0.0000
OTU_1021	F_Glomeraceae	0.0000	0.0000	0.0000	0.0000	0.0011	0.0019	0.0059	0.0000	0.0000	0.0000	0.0000	0.0000	0.0000	0.0000	0.0000	0.0000	0.0000	0.0000	0.0000	0.0000	0.0000	0.0000	0.0000	0.0000	0.0000	0.0000	0.0000	0.0000	0.0000	0.0000	0.0000	0.0000
OTU_1022	D_Fungi	0.0000	0.0000	0.0000	0.0000	0.0000	0.0019	0.0000	0.0011	0.0000	0.0012	0.0000	0.0000	0.0000	0.0000	0.0000	0.0010	0.0044	0.0000	0.0000	0.0015	0.0000	0.0000	0.0000	0.0015	0.0000	0.0000	0.0017	0.0000	0.0011	0.0000	0.0000	0.0000
OTU_1023	D_Fungi	0.0000	0.0000	0.0000	0.0000	0.0000	0.0019	0.0000	0.0000	0.0000	0.0012	0.0000	0.0000	0.0000	0.0000	0.0000	0.0000	0.0000	0.0000	0.0000	0.0000	0.0000	0.0000	0.0000	0.0000	0.0000	0.0000	0.0000	0.0000	0.0000	0.0000	0.0000	0.0000
OTU_1024	D_Fungi	0.0000	0.0000	0.0000	0.0000	0.0000	0.0029	0.0000	0.0000	0.0010	0.0000	0.0000	0.0000	0.0000	0.0000	0.0000	0.0000	0.0011	0.0000	0.0000	0.0000	0.0000	0.0025	0.0000	0.0000	0.0000	0.0016	0.0000	0.0000	0.0000	0.0000	0.0000	0.0000
OTU_1025	D_Fungi	0.0000	0.0000	0.0000	0.0000	0.0000	0.0019	0.0000	0.0011	0.0000	0.0000	0.0000	0.0000	0.0000	0.0000	0.0000	0.0000	0.0000	0.0000	0.0000	0.0000	0.0000	0.0000	0.0000	0.0000	0.0000	0.0000	0.0000	0.0000	0.0000	0.0000	0.0000	0.0000
OTU_1026	P_Ascomycota	0.0000	0.0000	0.0000	0.0013	0.0011	0.0019	0.0000	0.0000	0.0000	0.0000	0.0000	0.0013	0.0000	0.0000	0.0000	0.0000	0.0000	0.0000	0.0013	0.0015	0.0000	0.0000	0.0000	0.0015	0.0027	0.0016	0.0000	0.0010	0.0000	0.0010	0.0009	0.0000
OTU_1027	D_Fungi	0.0000	0.0019	0.0000	0.0000	0.0000	0.0029	0.0000	0.0022	0.0030	0.0000	0.0000	0.0000	0.0000	0.0000	0.0000	0.0000	0.0000	0.0000	0.0000	0.0000	0.0000	0.0000	0.0000	0.0000	0.0027	0.0031	0.0017	0.0000	0.0000	0.0000	0.0009	0.0000
OTU_1028	D_Fungi	0.0000	0.0000	0.0000	0.0000	0.0000	0.0029	0.0000	0.0000	0.0000	0.0000	0.0000	0.0000	0.0000	0.0000	0.0000	0.0000	0.0000	0.0000	0.0000	0.0000	0.0000	0.0000	0.0000	0.0000	0.0000	0.0000	0.0000	0.0000	0.0000	0.0000	0.0000	0.0000
OTU_1029	O_Glomerales	0.0010	0.0000	0.0000	0.0000	0.0000	0.0038	0.0379	0.0000	0.0000	0.0000	0.0000	0.0000	0.0000	0.0000	0.0000	0.0000	0.0000	0.0000	0.0000	0.0000	0.0000	0.0000	0.0058	0.0000	0.0000	0.0000	0.0000	0.0000	0.0000	0.0000	0.0000	0.0000
OTU_1030	G_Cladorrhinum	0.0000	0.0000	0.0000	0.0000	0.0000	0.0029	0.0017	0.0000	0.0000	0.0000	0.0000	0.0013	0.0000	0.0000	0.0000	0.0020	0.0000	0.0000	0.0000	0.0000	0.0000	0.0000	0.0000	0.0000	0.0000	0.0000	0.0000	0.0019	0.0000	0.0010	0.0000	0.0000
OTU_1031	D_Fungi	0.0020	0.0000	0.0000	0.0000	0.0000	0.0029	0.0017	0.0022	0.0000	0.0012	0.0000	0.0000	0.0000	0.0000	0.0000	0.0000	0.0011	0.0000	0.0013	0.0000	0.0000	0.0012	0.0000	0.0015	0.0000	0.0016	0.0017	0.0000	0.0000	0.0020	0.0009	0.0038
OTU_1032	D_Fungi	0.0000	0.0000	0.0000	0.0000	0.0000	0.0048	0.0042	0.0011	0.0000	0.0000	0.0000	0.0000	0.0000	0.0000	0.0000	0.0000	0.0000	0.0000	0.0000	0.0000	0.0000	0.0000	0.0000	0.0000	0.0000	0.0000	0.0000	0.0000	0.0000	0.0000	0.0000	0.0000
OTU_1033	P_Ascomycota	0.0000	0.0000	0.0000	0.0000	0.0000	0.0019	0.0000	0.0000	0.0000	0.0000	0.0000	0.0000	0.0000	0.0000	0.0000	0.0000	0.0000	0.0000	0.0000	0.0000	0.0000	0.0000	0.0000	0.0000	0.0000	0.0000	0.0000	0.0000	0.0000	0.0000	0.0000	0.0000
OTU_1034	G_Articulospora	0.0000	0.0000	0.0000	0.0000	0.0000	0.0000	0.0000	0.0000	0.0000	0.0000	0.0000	0.0000	0.0000	0.0000	0.0000	0.0133	0.0000	0.0000	0.0000	0.0000	0.0000	0.0000	0.0000	0.0000	0.0000	0.0000	0.0000	0.0000	0.0000	0.0000	0.0000	0.0000
OTU_1035	D_Fungi	0.0000	0.0000	0.0000	0.0000	0.0011	0.0000	0.0000	0.0000	0.0000	0.0012	0.0000	0.0000	0.0013	0.0000	0.0018	0.0000	0.0011	0.0000	0.0000	0.0000	0.0000	0.0000	0.0000	0.0000	0.0000	0.0000	0.0000	0.0000	0.0000	0.0010	0.0018	0.0000
OTU_1036	G_Ramicandelaber	0.0000	0.0000	0.0000	0.0000	0.0000	0.0000	0.0000	0.0000	0.0000	0.0000	0.0000	0.0000	0.0000	0.0000	0.0027	0.0000	0.0000	0.0000	0.0000	0.0000	0.0000	0.0000	0.0000	0.0000	0.0000	0.0000	0.0000	0.0000	0.0000	0.0000	0.0000	0.0000
OTU_1037	C_Agaricomycetes	0.0000	0.0000	0.0000	0.0000	0.0000	0.0000	0.0000	0.0000	0.0000	0.0000	0.0000	0.0000	0.0000	0.0000	0.0000	0.0153	0.0011	0.0030	0.3717	0.0000	0.0000	0.0012	0.0000	0.0105	0.0000	0.0000	0.0000	0.0000	0.0000	0.0000	0.0000	0.0000
OTU_1038	G_Conocybe	0.0000	0.0000	0.0000	0.0000	0.0000	0.0000	0.0000	0.0000	0.0000	0.0012	0.0000	0.0000	0.4593	0.0000	0.0009	0.0388	0.0000	0.0000	0.0000	0.0000	0.0000	0.0000	0.0000	0.0000	0.0000	0.0000	0.0000	0.0000	0.0000	0.0000	0.0000	0.0000
OTU_1039	D_Fungi	0.0000	0.0000	0.0000	0.0000	0.0000	0.0000	0.0000	0.0000	0.0000	0.0000	0.0000	0.0000	0.0000	0.0000	0.0018	0.0000	0.0000	0.0000	0.0000	0.0000	0.0000	0.0000	0.0000	0.0000	0.0000	0.0000	0.0000	0.0000	0.0000	0.0000	0.0000	0.0000
OTU_1040	D_Fungi	0.0000	0.0000	0.0000	0.0000	0.0000	0.0000	0.0000	0.0000	0.0000	0.0012	0.0000	0.0000	0.0000	0.0000	0.0018	0.0000	0.0000	0.0000	0.0000	0.0000	0.0000	0.0000	0.0000	0.0000	0.0000	0.0000	0.0017	0.0000	0.0000	0.0000	0.0000	0.0000
OTU_1041	G_Glomus	0.0000	0.0000	0.0000	0.0000	0.0000	0.0000	0.0000	0.0000	0.0000	0.0000	0.0000	0.0000	0.0000	0.0122	0.0018	0.0000	0.0000	0.0000	0.0000	0.0000	0.0000	0.0000	0.0000	0.0015	0.0000	0.0000	0.0000	0.0048	0.0000	0.0000	0.0045	0.0000
OTU_1042	G_Schizothecium	0.0000	0.0000	0.0000	0.0000	0.0000	0.0000	0.0000	0.0000	0.0000	0.0000	0.0000	0.0000	0.0000	0.0000	0.0000	0.0092	0.0000	0.0000	0.0000	0.0000	0.0000	0.0000	0.0000	0.0000	0.0000	0.0000	0.0000	0.0000	0.0000	0.0000	0.0000	0.0000
OTU_1043	C_Agaricomycetes	0.0000	0.0000	0.0000	0.0000	0.0000	0.0000	0.0000	0.0000	0.0000	0.0000	0.0000	0.0000	0.0000	0.0000	0.0000	0.0316	0.0000	0.0000	0.0000	0.0000	0.0000	0.0000	0.0000	0.0060	0.0000	0.0000	0.0000	0.0000	0.0000	0.0000	0.0000	0.0000
OTU_1044	C_Dothideomycetes	0.0000	0.0009	0.0000	0.0000	0.0000	0.0000	0.0000	0.0313	0.0000	0.0000	0.0000	0.0000	0.0000	0.0000	0.0000	0.0000	0.0000	0.0000	0.0000	0.0000	0.0000	0.0000	0.0000	0.0000	0.0000	0.0000	0.0000	0.0000	0.0000	0.0000	0.0000	0.0000
OTU_1045	D_Fungi	0.0000	0.0000	0.0000	0.0000	0.0000	0.0019	0.0034	0.0000	0.0000	0.0000	0.0000	0.0000	0.0000	0.0000	0.0000	0.0000	0.0000	0.0000	0.0000	0.0000	0.0000	0.0000	0.0000	0.0000	0.0000	0.0000	0.0000	0.0000	0.0000	0.0000	0.0000	0.0000
OTU_1046	C_Sordariomycetes	0.0000	0.0000	0.0000	0.0000	0.0000	0.0000	0.0000	0.0000	0.0000	0.0000	0.0000	0.0000	0.0000	0.0000	0.0009	0.0296	0.0000	0.0000	0.0000	0.0000	0.0000	0.0000	0.0000	0.0000	0.0000	0.0000	0.0000	0.0000	0.0000	0.0000	0.0000	0.0000
OTU_1047	D_Fungi	0.0000	0.0000	0.0000	0.0000	0.0000	0.0000	0.0000	0.0000	0.0000	0.0000	0.0000	0.0000	0.0000	0.0000	0.0000	0.0153	0.0154	0.0010	0.0000	0.0000	0.0000	0.0000	0.0015	0.0419	0.0082	0.0000	0.0000	0.0000	0.0000	0.0020	0.0000	0.0000
OTU_1048	D_Fungi	0.0000	0.0000	0.0000	0.0000	0.0000	0.0000	0.0000	0.0000	0.0000	0.0000	0.0000	0.0000	0.0000	0.0000	0.0000	0.0153	0.0000	0.0000	0.0000	0.0000	0.0000	0.0000	0.0000	0.0000	0.0000	0.0000	0.0000	0.0000	0.0000	0.0000	0.0000	0.0000
OTU_1049	G_Marasmius	0.0000	0.0000	0.0000	0.0000	0.0000	0.0000	0.0000	0.0000	0.0000	0.0186	0.0000	0.0000	0.0000	0.0000	0.0000	0.0724	0.0000	0.0000	0.0000	0.0000	0.0000	0.0000	0.0000	0.0000	0.0000	0.0000	0.0000	0.0000	0.0000	0.0000	0.0000	0.0000
OTU_1050	D_Fungi	0.0030	0.0000	0.0012	0.0013	0.0000	0.0010	0.0000	0.0022	0.0030	0.0000	0.0000	0.0000	0.0000	0.0012	0.0000	0.0041	0.0000	0.0010	0.0027	0.0060	0.0029	0.0000	0.0029	0.0015	0.0014	0.0000	0.0000	0.0010	0.0000	0.0010	0.0009	0.0019
OTU_1051	D_Fungi	0.0000	0.0000	0.0000	0.0013	0.0000	0.0000	0.0000	0.0000	0.0010	0.0000	0.0009	0.0000	0.0000	0.0012	0.0000	0.0031	0.0000	0.0000	0.0000	0.0000	0.0000	0.0000	0.0000	0.0015	0.0000	0.0000	0.0000	0.0000	0.0000	0.0000	0.0000	0.0000
OTU_1052	D_Fungi	0.0000	0.0000	0.0000	0.0000	0.0000	0.0010	0.0000	0.0000	0.0000	0.0012	0.0000	0.0000	0.0000	0.0000	0.0000	0.0092	0.0000	0.0000	0.0000	0.0000	0.0000	0.0000	0.0000	0.0000	0.0000	0.0000	0.0000	0.0000	0.0000	0.0000	0.0000	0.0000
OTU_1053	C_Sordariomycetes	0.0000	0.0000	0.0000	0.0000	0.0000	0.0000	0.0000	0.0000	0.0000	0.0000	0.0000	0.0000	0.0000	0.0000	0.0000	0.0082	0.0000	0.0000	0.0000	0.0000	0.0000	0.0000	0.0000	0.0000	0.0000	0.0000	0.0000	0.0000	0.0000	0.0010	0.0000	0.0000
OTU_1054	D_Fungi	0.0000	0.0000	0.0000	0.0000	0.0000	0.0000	0.0000	0.0000	0.0000	0.0000	0.0000	0.0000	0.0000	0.0000	0.0000	0.0092	0.0000	0.0000	0.0000	0.0000	0.0000	0.0000	0.0000	0.0000	0.0000	0.0000	0.0000	0.0000	0.0000	0.0000	0.0000	0.0000
OTU_1055	P_Glomeromycota	0.0000	0.0000	0.0000	0.0000	0.0000	0.0000	0.0000	0.0000	0.0130	0.0025	0.0000	0.0000	0.0000	0.0024	0.0000	0.0143	0.0000	0.0000	0.0000	0.0000	0.0000	0.0000	0.0000	0.0000	0.0000	0.0000	0.0000	0.0000	0.0000	0.0000	0.0000	0.0000
OTU_1056	P_Ascomycota	0.0000	0.0000	0.0000	0.0000	0.0000	0.0000	0.0000	0.0000	0.0080	0.0025	0.0000	0.0054	0.0000	0.0000	0.0000	0.0061	0.0000	0.0000	0.0000	0.0000	0.0000	0.0000	0.0000	0.0000	0.0000	0.0000	0.0000	0.0000	0.0000	0.0000	0.0000	0.0000
OTU_1057	D_Fungi	0.0000	0.0000	0.0000	0.0000	0.0000	0.0000	0.0000	0.0000	0.0000	0.0000	0.0000	0.0013	0.0000	0.0000	0.0000	0.0490	0.0000	0.0000	0.0013	0.0000	0.0000	0.0000	0.0000	0.0000	0.0000	0.0000	0.0000	0.0000	0.0000	0.0000	0.0000	0.0000
OTU_1058	G_Mortierella	1.0637	1.2303	1.1116	1.8631	1.2248	1.3616	0.6167	2.5091	2.9404	2.0108	9.9778	5.2503	6.1615	3.3708	5.2846	8.1385	0.8502	0.0488	0.0983	0.2427	0.0305	1.7472	0.0758	0.2841	2.0931	2.9613	3.5339	2.4953	2.3373	2.1257	6.4163	3.0362
OTU_1059	D_Fungi	0.0010	0.0000	0.0000	0.0025	0.0011	0.0000	0.0008	0.0000	0.0000	0.0000	0.0000	0.0013	0.0013	0.0000	0.0018	0.0000	0.0000	0.0010	0.0000	0.0000	0.0029	0.0000	0.0000	0.0000	0.0000	0.0000	0.0000	0.0000	0.0000	0.0000	0.0009	0.0000
OTU_1060	D_Fungi	0.0000	0.0000	0.0000	0.0000	0.0000	0.0000	0.0000	0.0000	0.0030	0.0000	0.0000	0.0013	0.0000	0.0000	0.0009	0.0041	0.0000	0.0010	0.0000	0.0045	0.0000	0.0000	0.0000	0.0060	0.0000	0.0000	0.0000	0.0000	0.0000	0.0000	0.0000	0.0019
OTU_1061	O_Hypocreales	0.0000	0.0019	0.0000	0.0013	0.0000	0.0000	0.0000	0.0000	0.0010	0.0000	0.0009	0.0000	0.0013	0.0024	0.0045	0.0051	0.0022	0.0000	0.0000	0.0030	0.0000	0.0000	0.0000	0.0000	0.0068	0.0063	0.0017	0.0000	0.0023	0.0000	0.0000	0.0000
OTU_1062	D_Fungi	0.0000	0.0000	0.0000	0.0000	0.0000	0.0000	0.0000	0.0000	0.0000	0.0000	0.0000	0.0000	0.0000	0.0000	0.0000	0.0031	0.0000	0.0000	0.0000	0.0000	0.0000	0.0000	0.0000	0.0000	0.0000	0.0000	0.0000	0.0000	0.0000	0.0000	0.0000	0.0000
OTU_1063	D_Fungi	0.0000	0.0000	0.0000	0.0000	0.0000	0.0000	0.0000	0.0000	0.0000	0.0000	0.0000	0.0000	0.0000	0.0000	0.0000	0.0051	0.0000	0.0000	0.0000	0.0000	0.0000	0.0000	0.0000	0.0000	0.0000	0.0000	0.0000	0.0000	0.0000	0.0000	0.0000	0.0000
OTU_1064	G_Cryptococcus	0.0000	0.0009	0.0012	0.0000	0.0000	0.0000	0.0017	0.0000	0.0000	0.0000	0.0028	0.0000	0.0000	0.0000	0.0000	0.0020	0.0000	0.0000	0.0000	0.0000	0.0000	0.0000	0.0015	0.0000	0.0000	0.0000	0.0000	0.0019	0.0000	0.0000	0.0000	0.0000
OTU_1065	D_Fungi	0.0050	0.0000	0.0000	0.0000	0.0000	0.0000	0.0017	0.0000	0.0000	0.0000	0.0000	0.0000	0.0000	0.0012	0.0000	0.0000	0.0000	0.0000	0.0000	0.0000	0.0000	0.0000	0.0000	0.0000	0.0000	0.0000	0.0000	0.0010	0.0000	0.0020	0.0000	0.0000
OTU_1066	G_Eurotium	0.0000	0.0000	0.0000	0.0013	0.0000	0.0000	0.0017	0.0000	0.0010	0.0000	0.0000	0.0000	0.0026	0.0000	0.0000	0.0000	0.0022	0.0000	0.0000	0.0015	0.0000	0.0000	0.0000	0.0015	0.0000	0.0000	0.0000	0.0019	0.0011	0.0010	0.0009	0.0019
OTU_1067	G_Cryptococcus	0.0000	0.0009	0.0000	0.0000	0.0000	0.0000	0.0017	0.0000	0.0000	0.0012	0.0000	0.0000	0.0000	0.0000	0.0000	0.0000	0.0000	0.0060	0.0000	0.0000	0.0029	0.0000	0.0015	0.0015	0.0000	0.0000	0.0000	0.0000	0.0000	0.0000	0.0000	0.0000
OTU_1068	G_Zalerion	0.0000	0.0000	0.0000	0.0000	0.0000	0.0000	0.0017	0.0000	0.0000	0.0000	0.0000	0.0000	0.0000	0.0000	0.0000	0.0000	0.0000	0.0000	0.0000	0.0000	0.0000	0.0000	0.0000	0.0000	0.0000	0.0000	0.0000	0.0000	0.0000	0.0000	0.0000	0.0000
OTU_1069	D_Fungi	0.0000	0.0000	0.0000	0.0000	0.0000	0.0000	0.0017	0.0000	0.0000	0.0000	0.0000	0.0000	0.0000	0.0000	0.0000	0.0010	0.0000	0.0000	0.0000	0.0000	0.0000	0.0000	0.0000	0.0000	0.0000	0.0000	0.0000	0.0000	0.0000	0.0000	0.0000	0.0000
OTU_1070	G_Claroideoglomus	0.0000	0.0000	0.0000	0.0000	0.0033	0.0200	0.0109	0.0086	0.0000	0.0050	0.0000	0.0000	0.0000	0.0000	0.0117	0.0020	0.0000	0.0000	0.0000	0.0000	0.0000	0.0061	0.0015	0.0000	0.0000	0.0000	0.0000	0.0000	0.0000	0.0000	0.0000	0.0000
OTU_1071	G_Cryptococcus	0.0000	0.0000	0.0000	0.0000	0.0000	0.0000	0.0025	0.0000	0.0000	0.0000	0.0000	0.0000	0.0000	0.0000	0.0000	0.0000	0.0000	0.0010	0.0000	0.0000	0.0000	0.0000	0.0000	0.0000	0.0000	0.0000	0.0000	0.0000	0.0000	0.0000	0.0000	0.0000
OTU_1072	D_Fungi	0.0000	0.0000	0.0000	0.0000	0.0000	0.0000	0.0017	0.0000	0.0000	0.0000	0.0000	0.0000	0.0000	0.0000	0.0000	0.0000	0.0011	0.0000	0.0000	0.0000	0.0015	0.0000	0.0000	0.0000	0.0041	0.0016	0.0017	0.0010	0.0000	0.0000	0.0018	0.0000
OTU_1073	G_Coprinopsis	0.0000	0.0000	0.0000	0.0000	0.0000	0.0000	0.0025	0.0000	0.0000	0.0000	0.0000	0.0013	0.0000	0.0012	0.0000	0.0000	0.0000	0.0000	0.0000	0.0015	0.0000	0.0012	0.0000	0.0000	0.0000	0.0016	0.0068	0.0000	0.0011	0.0000	0.0000	0.0000
OTU_1074	D_Fungi	0.0000	0.0009	0.0000	0.0000	0.0000	0.0000	0.0017	0.0000	0.0020	0.0000	0.0000	0.0013	0.0000	0.0000	0.0000	0.0000	0.0000	0.0000	0.0000	0.0000	0.0000	0.0000	0.0000	0.0015	0.0000	0.0000	0.0000	0.0000	0.0000	0.0000	0.0000	0.0000
OTU_1075	D_Fungi	0.0119	0.0019	0.0012	0.0051	0.0000	0.0029	0.0025	0.0043	0.0110	0.0012	0.0000	0.0054	0.0039	0.0024	0.0009	0.0041	0.0253	0.0110	0.0444	0.0328	0.0029	0.0074	0.0408	0.0284	0.0177	0.0172	0.0068	0.0067	0.0091	0.0000	0.0054	0.0095
OTU_1076	D_Fungi	0.0000	0.0000	0.0000	0.0000	0.0000	0.0000	0.0000	0.0022	0.0000	0.0000	0.0000	0.0000	0.0000	0.0000	0.0000	0.0000	0.0000	0.0000	0.0000	0.0030	0.0000	0.0000	0.0000	0.0000	0.0000	0.0000	0.0000	0.0000	0.0000	0.0000	0.0000	0.0000
OTU_1077	D_Fungi	0.0159	0.0009	0.0012	0.0013	0.0011	0.0000	0.0025	0.0022	0.0000	0.0000	0.0000	0.0000	0.0000	0.0000	0.0009	0.0020	0.0121	0.0030	0.0000	0.0030	0.0015	0.0000	0.0000	0.0015	0.0027	0.0016	0.0000	0.0010	0.0000	0.0000	0.0000	0.0000
OTU_1078	D_Fungi	0.0030	0.0000	0.0000	0.0000	0.0000	0.0000	0.0000	0.0065	0.0000	0.0000	0.0000	0.0000	0.0000	0.0000	0.0000	0.0000	0.0000	0.0000	0.0000	0.0000	0.0000	0.0000	0.0000	0.0000	0.0000	0.0000	0.0000	0.0000	0.0000	0.0000	0.0000	0.0000
OTU_1079	G_Heterobasidion	0.0000	0.0000	0.0012	0.0025	0.0033	0.0000	0.0017	0.0032	0.0010	0.0000	0.0000	0.0000	0.0013	0.0024	0.0000	0.0000	0.0000	0.0000	0.0000	0.0000	0.0000	0.0012	0.0000	0.0000	0.0000	0.0000	0.0017	0.0019	0.0023	0.0049	0.0036	0.0000
OTU_1080	F_Mortierellaceae	0.0000	0.0000	0.0012	0.0000	0.0000	0.0000	0.0017	0.0000	0.0000	0.0000	0.0000	0.0000	0.0000	0.0000	0.0000	0.0000	0.0000	0.0000	0.0000	0.0000	0.0000	0.0000	0.0000	0.0000	0.0000	0.0000	0.0000	0.0000	0.0000	0.0000	0.0000	0.0000
OTU_1081	P_Ascomycota	0.0010	0.0000	0.0000	0.0000	0.0011	0.0000	0.0017	0.0000	0.0000	0.0000	0.0000	0.0000	0.0000	0.0000	0.0000	0.0010	0.0011	0.0000	0.0000	0.0060	0.0000	0.0000	0.0015	0.0030	0.0000	0.0000	0.0000	0.0000	0.0000	0.0020	0.0009	0.0000
OTU_1082	D_Fungi	0.0000	0.0000	0.0000	0.0000	0.0000	0.0000	0.0017	0.0000	0.0000	0.0000	0.0000	0.0000	0.0000	0.0000	0.0000	0.0000	0.0000	0.0000	0.0000	0.0000	0.0000	0.0000	0.0000	0.0000	0.0000	0.0000	0.0000	0.0000	0.0000	0.0000	0.0000	0.0000
OTU_1083	D_Fungi	0.0000	0.0009	0.0000	0.0000	0.0044	0.0000	0.0025	0.0011	0.0020	0.0012	0.0000	0.0000	0.0013	0.0012	0.0009	0.0020	0.0022	0.0020	0.0000	0.0000	0.0000	0.0012	0.0000	0.0000	0.0000	0.0000	0.0000	0.0000	0.0034	0.0010	0.0009	0.0000
OTU_1084	D_Fungi	0.0000	0.0000	0.0000	0.0000	0.0000	0.0000	0.0000	0.0086	0.0030	0.0000	0.0000	0.0013	0.0000	0.0000	0.0000	0.0000	0.0000	0.0000	0.0000	0.0000	0.0000	0.0000	0.0000	0.0000	0.0000	0.0000	0.0000	0.0000	0.0000	0.0000	0.0000	0.0000
OTU_1085	D_Fungi	0.0010	0.0009	0.0000	0.0000	0.0000	0.0000	0.0017	0.0011	0.0000	0.0037	0.0009	0.0000	0.0000	0.0000	0.0000	0.0000	0.0000	0.0000	0.0000	0.0000	0.0000	0.0012	0.0000	0.0000	0.0014	0.0000	0.0000	0.0000	0.0000	0.0000	0.0009	0.0000
OTU_1086	O_Sporidiobolales	0.0000	0.0000	0.0000	0.0000	0.0011	0.0000	0.0017	0.0000	0.0000	0.0000	0.0000	0.0000	0.0000	0.0000	0.0000	0.0000	0.0000	0.0000	0.0000	0.0000	0.0000	0.0000	0.0000	0.0000	0.0000	0.0000	0.0000	0.0000	0.0011	0.0000	0.0000	0.0000
OTU_1087	G_Ramicandelaber	0.0050	0.0047	0.0000	0.0000	0.0089	0.0048	0.0034	0.0000	0.0100	0.0087	0.0000	0.0000	0.0065	0.0024	0.0018	0.0010	0.0077	0.0020	0.0000	0.0045	0.0015	0.0025	0.0160	0.0000	0.0082	0.0031	0.0051	0.0010	0.0045	0.0226	0.0100	0.0019
OTU_1088	P_Ascomycota	0.0000	0.0000	0.0000	0.0000	0.0000	0.0000	0.0017	0.0000	0.0000	0.0000	0.0000	0.0000	0.0000	0.0000	0.0000	0.0000	0.0000	0.0000	0.0000	0.0000	0.0000	0.0000	0.0000	0.0000	0.0000	0.0000	0.0000	0.0000	0.0000	0.0000	0.0000	0.0019
OTU_1089	G_Dactylella	0.0010	0.0009	0.0000	0.0000	0.0000	0.0000	0.0000	0.0129	0.0000	0.0000	0.0000	0.0000	0.0000	0.0000	0.0000	0.0000	0.0000	0.0000	0.0000	0.0000	0.0000	0.0000	0.0000	0.0000	0.0000	0.0000	0.0000	0.0000	0.0000	0.0000	0.0000	0.0000
OTU_1090	D_Fungi	0.0000	0.0000	0.0000	0.0000	0.0000	0.0000	0.0000	0.0216	0.0000	0.0000	0.0000	0.0000	0.0000	0.0012	0.0000	0.0000	0.0000	0.0000	0.0000	0.0000	0.0000	0.0000	0.0000	0.0030	0.0000	0.0000	0.0000	0.0000	0.0000	0.0000	0.0036	0.0000
OTU_1091	D_Fungi	0.0377	0.0000	0.0000	0.0000	0.0000	0.0000	0.0059	0.0000	0.0000	0.0000	0.0000	0.0000	0.0000	0.0000	0.0000	0.0000	0.0000	0.0010	0.0040	0.0030	0.0044	0.0000	0.0146	0.0030	0.0014	0.0016	0.0034	0.0000	0.0000	0.0000	0.0000	0.0000
OTU_1092	C_Glomeromycetes	0.0010	0.0000	0.0000	0.0000	0.0333	0.0181	0.0648	0.0733	0.0000	0.0298	0.0270	0.0040	0.0129	0.0256	0.0170	0.0377	0.0000	0.0000	0.0000	0.0000	0.0145	0.0012	0.0088	0.0000	0.0068	0.0125	0.0068	0.0201	0.0114	0.0394	0.0371	0.0474
OTU_1093	D_Fungi	0.0050	0.0028	0.0097	0.0051	0.0056	0.0019	0.0042	0.0032	0.0040	0.0000	0.0019	0.0040	0.0039	0.0012	0.0009	0.0031	0.0088	0.0050	0.0108	0.0045	0.0000	0.0012	0.0102	0.0090	0.0000	0.0031	0.0034	0.0019	0.0000	0.0010	0.0009	0.0019
OTU_1094	D_Fungi	0.0000	0.0000	0.0000	0.0013	0.0022	0.0010	0.0749	0.0000	0.0000	0.0000	0.0000	0.0000	0.0013	0.0000	0.0000	0.0000	0.0000	0.0000	0.0000	0.0000	0.0087	0.0000	0.0000	0.0000	0.0014	0.0000	0.0017	0.0000	0.0205	0.0020	0.0018	0.0000
OTU_1095	G_Glomus	0.0000	0.0000	0.0000	0.0000	0.0044	0.0000	0.0000	0.0000	0.0000	0.0000	0.0000	0.0000	0.0000	0.0000	0.0027	0.0000	0.0000	0.0000	0.0000	0.0000	0.0000	0.0000	0.0000	0.0000	0.0000	0.0000	0.0000	0.0038	0.0000	0.0000	0.0009	0.0000
OTU_1096	D_Fungi	0.0000	0.0000	0.0000	0.0000	0.0022	0.0000	0.0000	0.0000	0.0000	0.0000	0.0000	0.0000	0.0000	0.0000	0.0000	0.0000	0.0000	0.0000	0.0000	0.0000	0.0000	0.0000	0.0000	0.0000	0.0000	0.0000	0.0000	0.0000	0.0000	0.0000	0.0000	0.0000
OTU_1097	D_Fungi	0.0010	0.0000	0.0000	0.0000	0.0022	0.0010	0.0008	0.0011	0.0020	0.0012	0.0000	0.0027	0.0013	0.0000	0.0000	0.0000	0.0000	0.0020	0.0013	0.0030	0.0029	0.0025	0.0015	0.0000	0.0000	0.0000	0.0000	0.0019	0.0023	0.0010	0.0009	0.0000
OTU_1098	D_Fungi	0.0000	0.0000	0.0000	0.0000	0.0022	0.0000	0.0000	0.0000	0.0000	0.0000	0.0000	0.0013	0.0000	0.0000	0.0000	0.0000	0.0000	0.0000	0.0000	0.0000	0.0000	0.0000	0.0000	0.0000	0.0014	0.0031	0.0000	0.0000	0.0011	0.0000	0.0000	0.0000
OTU_1099	D_Fungi	0.0287	0.0028	0.0000	0.0000	0.0000	0.0000	0.0008	0.0000	0.0000	0.0000	0.0000	0.0000	0.0000	0.0000	0.0000	0.0000	0.0000	0.0000	0.0000	0.0000	0.0000	0.0000	0.0000	0.0000	0.0000	0.0000	0.0000	0.0000	0.0000	0.0000	0.0000	0.0000
OTU_1100	G_Meyerozyma	0.0198	0.0000	0.0000	0.0000	0.0000	0.0000	0.0000	0.0000	0.0000	0.0000	0.0000	0.0000	0.0000	0.0000	0.0000	0.0000	0.0000	0.0000	0.0000	0.0000	0.0000	0.0000	0.0000	0.0000	0.0000	0.0000	0.0000	0.0019	0.0000	0.0000	0.0000	0.0000
OTU_1101	D_Fungi	0.0367	0.0000	0.0000	0.0000	0.0000	0.0029	0.0000	0.0054	0.0270	0.0000	0.0000	0.0000	0.0000	0.0000	0.0009	0.0031	0.0000	0.0000	0.0000	0.0000	0.0000	0.0000	0.0000	0.0000	0.0014	0.0000	0.0000	0.0000	0.0000	0.0000	0.0009	0.0076
OTU_1102	D_Fungi	0.0099	0.0000	0.0000	0.0000	0.0000	0.0000	0.0000	0.0000	0.0000	0.0000	0.0000	0.0000	0.0000	0.0000	0.0000	0.0000	0.0000	0.0000	0.0000	0.0000	0.0000	0.0000	0.0000	0.0000	0.0000	0.0000	0.0000	0.0000	0.0000	0.0000	0.0000	0.0000
OTU_1103	G_Mortierella	2.1600	1.0270	1.3550	0.8035	2.4007	1.2627	1.1687	1.1705	0.6319	0.6027	1.0509	2.6823	0.5771	5.0892	3.1263	3.4696	1.3994	0.0289	0.0660	0.0506	0.0436	1.2033	0.0394	0.0553	0.9310	1.4955	2.3893	2.5049	0.7272	2.1375	2.8306	2.2132
OTU_1104	G_Mucor	0.0000	0.0037	0.0000	0.0013	0.0000	0.0000	0.0000	0.0011	0.0030	0.0000	0.0019	0.0000	0.0013	0.0012	0.0000	0.0020	0.0000	0.0000	0.0000	0.0000	0.0000	0.0000	0.0000	0.0000	0.0000	0.0000	0.0000	0.0000	0.0000	0.0000	0.0000	0.0000
OTU_1105	D_Fungi	0.0000	0.0019	0.0000	0.0000	0.0000	0.0000	0.0000	0.0000	0.0000	0.0000	0.0000	0.0000	0.0000	0.0000	0.0018	0.0000	0.0000	0.0000	0.0000	0.0000	0.0000	0.0000	0.0000	0.0000	0.0000	0.0000	0.0000	0.0000	0.0000	0.0000	0.0000	0.0000
OTU_1106	C_Leotiomycetes	0.0050	0.0028	0.0000	0.0000	0.0011	0.0010	0.0000	0.0011	0.0000	0.0000	0.0000	0.0013	0.0000	0.0000	0.0000	0.0000	0.0000	0.0000	0.0000	0.0000	0.0000	0.0000	0.0000	0.0000	0.0000	0.0000	0.0000	0.0000	0.0000	0.0000	0.0000	0.0000
OTU_1107	G_Mortierella	0.0010	0.0037	0.0000	0.0000	0.0000	0.0000	0.0000	0.0000	0.0070	0.0000	0.0000	0.0000	0.0000	0.0000	0.0000	0.0000	0.0000	0.0000	0.0000	0.0000	0.0000	0.0000	0.0000	0.0000	0.0000	0.0000	0.0000	0.0000	0.0000	0.0020	0.0000	0.0000
OTU_1108	D_Fungi	0.0000	0.0028	0.0000	0.0000	0.0033	0.0000	0.0008	0.0000	0.0000	0.0000	0.0000	0.0000	0.0000	0.0000	0.0000	0.0000	0.0000	0.0000	0.0000	0.0000	0.0058	0.0000	0.0000	0.0359	0.0000	0.0000	0.0000	0.0000	0.0000	0.0000	0.0000	0.0000
OTU_1109	P_Ascomycota	0.0010	0.0056	0.0000	0.0000	0.0000	0.0000	0.0008	0.0000	0.0000	0.0000	0.0000	0.0000	0.0000	0.0000	0.0000	0.0000	0.0000	0.0000	0.0013	0.0015	0.0000	0.0000	0.0000	0.0000	0.0000	0.0031	0.0000	0.0000	0.0000	0.0000	0.0000	0.0000
OTU_1110	G_Pterula	0.0000	0.0019	0.0000	0.0000	0.0011	0.0000	0.0000	0.0000	0.0000	0.0000	0.0000	0.0000	0.0000	0.0000	0.0000	0.0000	0.0000	0.4950	0.0000	0.0000	0.0000	0.0000	0.3981	0.0015	0.0000	0.0000	0.0000	0.0000	0.0000	0.0000	0.0000	0.0000
OTU_1111	F_Chaetomiaceae	0.0000	0.0019	0.0000	0.0000	0.0011	0.0000	0.0000	0.0000	0.0000	0.0000	0.0000	0.0027	0.0000	0.0012	0.0009	0.0000	0.0000	0.0000	0.0000	0.0015	0.0000	0.0000	0.0000	0.0000	0.0000	0.0000	0.0000	0.0000	0.0011	0.0010	0.0000	0.0000
OTU_1112	D_Fungi	0.0000	0.0019	0.0000	0.0000	0.0000	0.0000	0.0000	0.0000	0.0010	0.0012	0.0009	0.0000	0.0000	0.0012	0.0009	0.0000	0.0000	0.0000	0.0000	0.0000	0.0000	0.0000	0.0000	0.0000	0.0000	0.0000	0.0000	0.0000	0.0000	0.0000	0.0000	0.0000
OTU_1113	P_Ascomycota	0.0000	0.0028	0.0000	0.0000	0.0011	0.0000	0.0000	0.0000	0.0000	0.0012	0.0000	0.0000	0.0000	0.0000	0.0000	0.0000	0.0011	0.0000	0.0121	0.0000	0.0087	0.0012	0.0015	0.0060	0.0014	0.0000	0.0000	0.0000	0.0000	0.0000	0.0000	0.0000
OTU_1114	D_Fungi	0.0010	0.0028	0.0000	0.0013	0.0000	0.0000	0.0008	0.0032	0.0000	0.0000	0.0000	0.0000	0.0000	0.0000	0.0000	0.0000	0.0011	0.0000	0.0000	0.0000	0.0000	0.0000	0.0000	0.0000	0.0000	0.0000	0.0000	0.0000	0.0000	0.0000	0.0000	0.0000
OTU_1115	G_Amphinema	0.0000	0.0056	0.0000	0.0000	0.0000	0.0000	0.0000	0.0000	0.0000	0.0000	0.0000	0.0000	0.0000	0.0000	0.0000	0.0000	0.0000	0.0000	0.0000	0.0000	0.0000	0.0000	0.0000	0.0000	0.0000	0.0000	0.0000	0.0010	0.0000	0.0000	0.0018	0.0000
OTU_1116	G_Zopfiella	0.0000	0.0019	0.0000	0.0000	0.0000	0.0000	0.0000	0.0000	0.0000	0.0000	0.0000	0.0000	0.0000	0.0000	0.0000	0.0000	0.0000	0.0000	0.0000	0.0000	0.0000	0.0000	0.0000	0.0000	0.0000	0.0000	0.0000	0.0000	0.0000	0.0000	0.0000	0.0000
OTU_1117	D_Fungi	0.0079	0.0028	0.0000	0.0013	0.0000	0.0010	0.0008	0.0022	0.0020	0.0099	0.0000	0.0000	0.0013	0.0012	0.0018	0.0000	0.0011	0.0020	0.0013	0.0045	0.0015	0.0000	0.0015	0.0105	0.0027	0.0031	0.0017	0.0019	0.0000	0.0010	0.0000	0.0000
OTU_1118	D_Fungi	0.0000	0.0066	0.0036	0.0013	0.0011	0.0010	0.0000	0.0000	0.0000	0.0000	0.0000	0.0000	0.0000	0.0000	0.0009	0.0010	0.0022	0.0020	0.0013	0.0015	0.0015	0.0025	0.0000	0.0000	0.0000	0.0000	0.0000	0.0000	0.0011	0.0098	0.0000	0.0000
OTU_1119	P_Ascomycota	0.0000	0.0019	0.0000	0.0000	0.0000	0.0000	0.0000	0.0011	0.0000	0.0000	0.0000	0.0000	0.0013	0.0000	0.0000	0.0010	0.0011	0.0000	0.0000	0.0000	0.0000	0.0000	0.0015	0.0000	0.0014	0.0000	0.0034	0.0067	0.0023	0.0049	0.0063	0.0019
OTU_1120	G_Arthrobotrys	0.0010	0.0019	0.0000	0.0000	0.0000	0.0000	0.0000	0.0000	0.0000	0.0000	0.0000	0.0000	0.0000	0.0000	0.0000	0.0000	0.0000	0.0000	0.0094	0.0000	0.0000	0.0000	0.0000	0.0015	0.0000	0.0000	0.0000	0.0019	0.0057	0.0000	0.0000	0.0019
OTU_1121	G_Hypholoma	0.0010	0.0019	0.0024	0.0000	0.0011	0.0019	0.0008	0.0000	0.0010	0.0000	0.0000	0.0013	0.0000	0.0000	0.0000	0.0000	0.0011	0.0020	0.0013	0.0000	0.0029	0.0000	0.0015	0.0015	0.0027	0.0000	0.0000	0.0029	0.0011	0.0010	0.0018	0.0038
OTU_1122	D_Fungi	0.0000	0.0019	0.0000	0.0013	0.0000	0.0000	0.0000	0.0000	0.0000	0.0000	0.0000	0.0000	0.0000	0.0012	0.0000	0.0000	0.0000	0.0000	0.0000	0.0000	0.0000	0.0000	0.0000	0.0000	0.0000	0.0000	0.0000	0.0000	0.0000	0.0000	0.0000	0.0000
OTU_1123	D_Fungi	0.0020	0.0019	0.0121	0.0000	0.0000	0.0000	0.0000	0.0000	0.0000	0.0012	0.0000	0.0000	0.0000	0.0000	0.0000	0.0000	0.0000	0.0000	0.0000	0.0000	0.0000	0.0000	0.0000	0.0000	0.0000	0.0000	0.0000	0.0000	0.0000	0.0000	0.0000	0.0000
OTU_1124	C_Sordariomycetes	0.0010	0.0037	0.0000	0.0013	0.0000	0.0000	0.0008	0.0011	0.0010	0.0000	0.0009	0.0000	0.0000	0.0000	0.0000	0.0000	0.0011	0.0000	0.0000	0.0030	0.0000	0.0012	0.0000	0.0000	0.0000	0.0000	0.0000	0.0000	0.0000	0.0000	0.0009	0.0019
OTU_1125	C_Agaricomycetes	0.0050	0.0000	0.0678	0.0000	0.0000	0.0000	0.0000	0.0011	0.0130	0.0000	0.0019	0.0054	0.0013	0.0000	0.0000	0.0000	0.0066	0.0000	0.0000	0.0000	0.0000	0.0000	0.0000	0.0000	0.0014	0.0000	0.0068	0.3705	0.0000	0.1496	0.0036	0.0019
OTU_1126	G_Lophiostoma	0.0000	0.0000	0.0073	0.0000	0.0000	0.0000	0.0000	0.0000	0.0000	0.0000	0.0000	0.0000	0.0000	0.0000	0.0000	0.0000	0.0000	0.0000	0.0000	0.0000	0.0000	0.0000	0.0000	0.0000	0.0000	0.0000	0.0000	0.0000	0.0000	0.0010	0.0000	0.0000
OTU_1127	G_Thelephora	0.0000	0.0019	0.0000	0.0000	0.0000	0.0010	0.0008	0.0000	0.0000	0.0000	0.0000	0.0000	0.0000	0.0000	0.0000	0.0000	0.0000	0.0000	0.0000	0.0000	0.0000	0.0000	0.0000	0.0000	0.0000	0.0016	0.0000	0.0000	0.0000	0.0000	0.0000	0.0000
OTU_1128	D_Fungi	0.0010	0.0019	0.0000	0.0000	0.0000	0.0000	0.0008	0.0011	0.0020	0.0000	0.0000	0.0000	0.0000	0.0012	0.0000	0.0000	0.0022	0.0000	0.0027	0.0000	0.0000	0.0012	0.0029	0.0000	0.0000	0.0000	0.0000	0.0000	0.0023	0.0020	0.0018	0.0000
OTU_1129	D_Fungi	0.0000	0.0000	0.0036	0.0000	0.0000	0.0000	0.0000	0.0000	0.0000	0.0000	0.0000	0.0000	0.0000	0.0000	0.0009	0.0000	0.0000	0.0000	0.0000	0.0000	0.0000	0.0000	0.0000	0.0000	0.0000	0.0000	0.0000	0.0000	0.0000	0.0000	0.0000	0.0000
OTU_1130	D_Fungi	0.0000	0.0000	0.0097	0.0000	0.0000	0.0000	0.0000	0.0000	0.0000	0.0000	0.0009	0.0000	0.0000	0.0000	0.0000	0.0000	0.0000	0.0000	0.0000	0.0015	0.0000	0.0000	0.0000	0.0000	0.0000	0.0000	0.0017	0.0019	0.0023	0.0000	0.0000	0.0019
OTU_1131	C_Sordariomycetes	0.0000	0.0009	0.0000	0.0025	0.0000	0.0029	0.0000	0.0000	0.0000	0.0012	0.0000	0.0000	0.0000	0.0000	0.0000	0.0000	0.0000	0.0000	0.0027	0.0000	0.0000	0.0012	0.0029	0.0000	0.0000	0.0000	0.0017	0.0000	0.0000	0.0010	0.0000	0.0000
OTU_1132	F_Pleosporaceae	0.0000	0.0000	0.0000	0.0000	0.0000	0.0019	0.0000	0.0000	0.0000	0.0000	0.0000	0.0000	0.0000	0.0000	0.0000	0.0000	0.0000	0.0000	0.0000	0.0000	0.0000	0.0000	0.0000	0.0000	0.0000	0.0000	0.0000	0.0000	0.0000	0.0000	0.0000	0.0000
OTU_1133	D_Fungi	0.0030	0.0009	0.0000	0.0000	0.0000	0.0019	0.0000	0.0032	0.0010	0.0000	0.0019	0.0000	0.0000	0.0012	0.0009	0.0020	0.0132	0.0020	0.0054	0.0000	0.0000	0.0037	0.0000	0.0000	0.0122	0.0000	0.0017	0.0010	0.0011	0.0049	0.0018	0.0152
OTU_1134	D_Fungi	0.0010	0.0028	0.0000	0.0000	0.0000	0.0029	0.0000	0.0011	0.0010	0.0000	0.0000	0.0000	0.0013	0.0000	0.0000	0.0020	0.0011	0.0000	0.0000	0.0045	0.0000	0.0000	0.0000	0.0015	0.0000	0.0016	0.0000	0.0000	0.0000	0.0000	0.0000	0.0000
OTU_1135	P_Ascomycota	0.0010	0.0000	0.0000	0.0000	0.0000	0.0019	0.0000	0.0000	0.0000	0.0000	0.0000	0.0000	0.0013	0.0000	0.0036	0.0020	0.0000	0.0000	0.0013	0.0000	0.0000	0.0000	0.0000	0.0000	0.0000	0.0000	0.0000	0.0000	0.0000	0.0000	0.0000	0.0000
OTU_1136	C_Sordariomycetes	0.0000	0.0000	0.0000	0.0000	0.4857	0.0010	0.7775	0.0000	0.0000	0.0000	0.0000	0.0000	0.0013	0.0012	0.0000	0.0000	0.0000	0.0000	0.0000	0.0000	0.0015	0.0000	0.0015	0.0000	0.0000	0.0000	0.0000	0.0000	0.0000	0.0000	0.0018	0.0000
OTU_1137	P_Ascomycota	0.0000	0.0000	0.0000	0.0000	0.0000	0.0019	0.0000	0.0000	0.0000	0.0000	0.0000	0.0000	0.0026	0.0000	0.0000	0.0000	0.0000	0.0000	0.0000	0.0000	0.0000	0.0000	0.0000	0.0000	0.0000	0.0000	0.0000	0.0000	0.0023	0.0000	0.0009	0.0000
OTU_1138	D_Fungi	0.0010	0.0019	0.0000	0.0025	0.0011	0.0019	0.0008	0.0000	0.0000	0.0000	0.0000	0.0000	0.0000	0.0012	0.0000	0.0000	0.0011	0.0020	0.0000	0.0000	0.0015	0.0012	0.0000	0.0000	0.0000	0.0000	0.0000	0.0000	0.0011	0.0000	0.0009	0.0019
OTU_1139	D_Fungi	0.0000	0.0000	0.0000	0.0000	0.0011	0.0000	0.0135	0.0011	0.0000	0.0000	0.0000	0.0000	0.0000	0.0000	0.0000	0.0000	0.0000	0.0000	0.0000	0.0000	0.0000	0.0000	0.0000	0.0000	0.0000	0.0000	0.0000	0.0000	0.0000	0.0000	0.0000	0.0000
OTU_1140	G_Rhizophagus	0.0000	0.0000	0.0000	0.0000	0.0022	0.0000	0.0395	0.0022	0.0000	0.0000	0.0000	0.0000	0.0000	0.0024	0.0009	0.0000	0.0000	0.0000	0.0000	0.0000	0.0000	0.0000	0.0000	0.0000	0.0000	0.0000	0.0000	0.0000	0.0000	0.0020	0.0000	0.0000
OTU_1141	G_Schizothecium	0.0000	0.0000	0.0000	0.0000	0.0000	0.0000	0.0210	0.0000	0.0000	0.0000	0.0000	0.0000	0.0000	0.0012	0.0000	0.0000	0.0000	0.0000	0.0000	0.0000	0.0000	0.0000	0.0000	0.0000	0.0000	0.0000	0.0000	0.0000	0.0000	0.0000	0.0000	0.0000
OTU_1142	F_Ceratobasidiaceae	0.0000	0.0000	0.0000	0.0000	0.0022	0.0000	0.0185	0.0000	0.0000	0.0000	0.0000	0.0000	0.0000	0.0012	0.0000	0.0000	0.0000	0.0000	0.0000	0.0000	0.0000	0.0000	0.0000	0.0000	0.0000	0.0000	0.0000	0.0000	0.0000	0.0000	0.0000	0.0000
OTU_1143	D_Fungi	0.0000	0.0000	0.0000	0.0000	0.0011	0.0000	0.0050	0.0000	0.0000	0.0000	0.0000	0.0000	0.0000	0.0000	0.0009	0.0000	0.0033	0.0020	0.0013	0.0000	0.0000	0.0000	0.0029	0.0000	0.0014	0.0000	0.0017	0.0010	0.0023	0.0000	0.0000	0.0000
OTU_1144	D_Fungi	0.0000	0.0000	0.0000	0.0000	0.0000	0.0010	0.0025	0.0000	0.0000	0.0000	0.0000	0.0000	0.0000	0.0000	0.0000	0.0000	0.0000	0.0000	0.0000	0.0000	0.0000	0.0000	0.0000	0.0000	0.0000	0.0000	0.0000	0.0000	0.0000	0.0000	0.0000	0.0000
OTU_1145	D_Fungi	0.0010	0.0000	0.0000	0.0000	0.0000	0.0000	0.0050	0.0000	0.0000	0.0000	0.0000	0.0000	0.0000	0.0012	0.0000	0.0000	0.0000	0.0000	0.0000	0.0000	0.0000	0.0000	0.0000	0.0000	0.0014	0.0000	0.0000	0.0000	0.0000	0.0000	0.0000	0.0000
OTU_1146	G_Arthrinium	0.0000	0.0000	0.0000	0.0000	0.0011	0.0000	0.0034	0.0000	0.0000	0.0000	0.0000	0.0000	0.0000	0.0012	0.0000	0.0000	0.0000	0.0020	0.0000	0.0000	0.0000	0.0000	0.0000	0.0000	0.0000	0.0000	0.0000	0.0000	0.0000	0.0000	0.0000	0.0000
OTU_1147	D_Fungi	0.0040	0.0009	0.0012	0.0013	0.0011	0.0019	0.0050	0.0011	0.0010	0.0037	0.0009	0.0054	0.0000	0.0012	0.0000	0.0020	0.0242	0.0020	0.0000	0.0000	0.0015	0.0037	0.0000	0.0015	0.0041	0.0016	0.0034	0.0019	0.0011	0.0059	0.0045	0.0038
OTU_1148	D_Fungi	0.0010	0.0000	0.0012	0.0000	0.0011	0.0000	0.0034	0.0022	0.0010	0.0000	0.0000	0.0000	0.0000	0.0000	0.0000	0.0010	0.0000	0.0010	0.0000	0.0000	0.0029	0.0037	0.0073	0.0090	0.0000	0.0000	0.0000	0.0000	0.0000	0.0020	0.0000	0.0000
OTU_1149	D_Fungi	0.0000	0.0000	0.0000	0.0013	0.0000	0.0000	0.0067	0.0000	0.0000	0.0000	0.0000	0.0000	0.0000	0.0000	0.0000	0.0000	0.0000	0.0000	0.0000	0.0000	0.0000	0.0000	0.0102	0.0000	0.0027	0.0000	0.0000	0.0000	0.0011	0.0010	0.0000	0.0095
OTU_1150	D_Fungi	0.0010	0.0000	0.0000	0.0013	0.0011	0.0010	0.0050	0.0011	0.0000	0.0000	0.0028	0.0000	0.0000	0.0000	0.0009	0.0010	0.0000	0.0000	0.0000	0.0000	0.0000	0.0000	0.0000	0.0000	0.0000	0.0000	0.0000	0.0000	0.0000	0.0000	0.0000	0.0000
OTU_1151	D_Fungi	0.0000	0.0009	0.0000	0.0000	0.0089	0.0029	0.0101	0.0000	0.0020	0.0000	0.0000	0.0013	0.0013	0.0012	0.0000	0.0000	0.0000	0.0000	0.0000	0.0000	0.0000	0.0000	0.0000	0.0000	0.0000	0.0000	0.0000	0.0000	0.0000	0.0000	0.0000	0.0000
OTU_1152	D_Fungi	0.0000	0.0000	0.0000	0.0000	0.0000	0.0000	0.0034	0.0022	0.0010	0.0000	0.0000	0.0000	0.0013	0.0012	0.0009	0.0000	0.0000	0.0000	0.0000	0.0000	0.0000	0.0000	0.0000	0.0000	0.0014	0.0000	0.0000	0.0000	0.0000	0.0020	0.0018	0.0000
OTU_1153	C_Glomeromycetes	0.0000	0.0000	0.0000	0.0013	0.0256	0.0257	0.0244	0.0129	0.0140	0.0211	0.0093	0.0040	0.0207	0.0146	0.0170	0.0041	0.0000	0.0000	0.0000	0.0000	0.0029	0.0012	0.0044	0.0015	0.0014	0.0000	0.0034	0.0029	0.0057	0.0030	0.0145	0.0019
OTU_1154	P_Ascomycota	0.0000	0.0000	0.0000	0.0000	0.0000	0.0000	0.0025	0.0000	0.0000	0.0000	0.0000	0.0000	0.0000	0.0000	0.0000	0.0000	0.0000	0.0000	0.0000	0.0000	0.0000	0.0000	0.0000	0.0000	0.0000	0.0000	0.0000	0.0000	0.0011	0.0000	0.0000	0.0000
OTU_1155	D_Fungi	0.0000	0.0000	0.0000	0.0000	0.0000	0.0000	0.0034	0.0000	0.0000	0.0000	0.0000	0.0000	0.0000	0.0000	0.0000	0.0000	0.0000	0.0000	0.0000	0.0000	0.0000	0.0000	0.0000	0.0000	0.0000	0.0000	0.0000	0.0000	0.0000	0.0000	0.0000	0.0000
OTU_1156	D_Fungi	0.0000	0.0000	0.0000	0.0000	0.0000	0.0000	0.0034	0.0000	0.0000	0.0000	0.0000	0.0000	0.0000	0.0000	0.0000	0.0000	0.0000	0.0000	0.0000	0.0000	0.0000	0.0000	0.0000	0.0000	0.0000	0.0000	0.0000	0.0000	0.0000	0.0000	0.0000	0.0000
OTU_1157	D_Fungi	0.0000	0.0047	0.0000	0.0000	0.0000	0.0000	0.0000	0.0000	0.0000	0.0000	0.0000	0.0000	0.0000	0.0000	0.0000	0.0000	0.0000	0.0000	0.0000	0.0000	0.0000	0.0000	0.0000	0.0000	0.0000	0.0000	0.0000	0.0000	0.0000	0.0000	0.0000	0.0000
OTU_1158	D_Fungi	0.0000	0.0000	0.0000	0.0000	0.0289	0.0000	0.0000	0.0000	0.0000	0.0000	0.0000	0.0000	0.0000	0.0000	0.0000	0.0000	0.0011	0.0000	0.0000	0.0000	0.0073	0.0000	0.0000	0.0000	0.0014	0.0000	0.0000	0.0000	0.0000	0.0000	0.0000	0.0000
OTU_1159	G_Funneliformis	0.0000	0.0019	0.0000	0.0025	0.1234	0.0152	0.0715	0.0334	0.0000	0.0099	0.0047	0.0013	0.0336	0.0159	0.0923	0.0000	0.0000	0.0000	0.0000	0.0000	0.1250	0.0651	0.0000	0.0000	0.0761	0.0251	0.0034	0.1900	0.0193	0.2234	0.0244	0.0360
OTU_1160	D_Fungi	0.0000	0.0000	0.0000	0.0000	0.0033	0.0010	0.0000	0.0000	0.0000	0.0000	0.0000	0.0000	0.0000	0.0000	0.0000	0.0000	0.0000	0.0000	0.0000	0.0000	0.0000	0.0000	0.0000	0.0000	0.0000	0.0000	0.0000	0.0000	0.0000	0.0000	0.0000	0.0000
OTU_1161	P_Basidiomycota	0.0000	0.0000	0.0000	0.0000	0.0433	0.0000	0.0000	0.0000	0.0000	0.0162	0.0000	0.0000	0.0000	0.0000	0.0000	0.0000	0.0000	0.0000	0.0000	0.0000	0.0000	0.0000	0.0000	0.0000	0.0000	0.0000	0.0000	0.0000	0.0000	0.0581	0.0000	0.0000
OTU_1162	P_Ascomycota	0.0000	0.0000	0.0000	0.0000	0.0089	0.0000	0.0000	0.0000	0.0000	0.0000	0.0000	0.0000	0.0000	0.0000	0.0000	0.0000	0.0000	0.0000	0.0000	0.0000	0.0000	0.0000	0.0000	0.0000	0.0000	0.0000	0.0000	0.0000	0.0000	0.0000	0.0000	0.0000
OTU_1163	D_Fungi	0.0000	0.0000	0.0000	0.0025	0.0044	0.0000	0.0000	0.0000	0.0010	0.0000	0.0000	0.0000	0.0000	0.0000	0.0000	0.0000	0.0011	0.0000	0.0121	0.0164	0.0000	0.0000	0.0044	0.0000	0.0000	0.0000	0.0017	0.0019	0.0000	0.0000	0.0000	0.0000
OTU_1164	G_Coprinopsis	0.0030	0.0000	0.0000	0.0000	0.0200	0.0000	0.0000	0.0000	0.0000	0.0000	0.0000	0.0000	0.0000	0.0000	0.0000	0.0000	0.0000	0.0000	0.0000	0.0000	0.0000	0.0000	0.0000	0.0000	0.0000	0.0000	0.0000	0.0000	0.0000	0.0000	0.0000	0.0000
OTU_1165	D_Fungi	0.0000	0.0000	0.0000	0.0000	0.0245	0.0000	0.0000	0.0000	0.0000	0.0000	0.0000	0.0000	0.0000	0.0000	0.0000	0.0000	0.0000	0.0000	0.0000	0.0000	0.0000	0.0000	0.0000	0.0000	0.0000	0.0000	0.0000	0.0000	0.0000	0.0000	0.0009	0.0000
OTU_1166	D_Fungi	0.0000	0.0000	0.0000	0.0000	0.0067	0.0000	0.0000	0.0000	0.0000	0.0000	0.0000	0.0000	0.0000	0.0000	0.0000	0.0000	0.0000	0.0000	0.0000	0.0000	0.0000	0.0000	0.0000	0.0000	0.0000	0.0000	0.0000	0.0000	0.0000	0.0000	0.0000	0.0000
OTU_1167	P_Chytridiomycota	0.0000	0.0000	0.0000	0.0000	0.0078	0.0010	0.0000	0.0011	0.0000	0.0000	0.0000	0.0000	0.0000	0.0024	0.0000	0.0000	0.0000	0.0000	0.0000	0.0000	0.0000	0.0000	0.0000	0.0000	0.0000	0.0000	0.0000	0.0000	0.0000	0.0089	0.0000	0.0019
OTU_1168	G_Malassezia	0.0010	0.0000	0.0024	0.0000	0.0044	0.0000	0.0000	0.0000	0.0000	0.0000	0.0009	0.0000	0.0000	0.0000	0.0000	0.0010	0.0000	0.0000	0.0000	0.0030	0.0000	0.0000	0.0000	0.0015	0.0000	0.0016	0.0000	0.0010	0.0114	0.0010	0.0027	0.0038
OTU_1169	D_Fungi	0.0010	0.0000	0.0000	0.0000	0.0033	0.0000	0.0000	0.0000	0.0000	0.0000	0.0000	0.0000	0.0000	0.0000	0.0000	0.0000	0.0000	0.0000	0.0000	0.0000	0.0000	0.0000	0.0000	0.0000	0.0014	0.0000	0.0000	0.0000	0.0000	0.0020	0.0000	0.0152
OTU_1170	P_Ascomycota	0.0000	0.0000	0.0000	0.0000	0.0022	0.0000	0.0000	0.0000	0.0000	0.0000	0.0000	0.0000	0.0000	0.0000	0.0000	0.0000	0.0000	0.0000	0.0000	0.0000	0.0000	0.0000	0.0000	0.0000	0.0000	0.0000	0.0000	0.0000	0.0000	0.0000	0.0000	0.0000
OTU_1171	G_Hyphodontia	0.0000	0.0000	0.0000	0.0013	0.0044	0.0000	0.0000	0.0000	0.0000	0.0000	0.0000	0.0000	0.0000	0.0000	0.0000	0.0000	0.0000	0.0000	0.0000	0.0000	0.0000	0.0000	0.0000	0.0000	0.0000	0.0000	0.0000	0.0000	0.0000	0.0000	0.0000	0.0000
OTU_1172	D_Fungi	0.0000	0.0009	0.0000	0.0013	0.0022	0.0000	0.0000	0.0000	0.0030	0.0000	0.0000	0.0000	0.0013	0.0000	0.0009	0.0000	0.0000	0.0000	0.0000	0.0000	0.0000	0.0000	0.0000	0.0000	0.0000	0.0000	0.0000	0.0000	0.0000	0.0000	0.0009	0.0000
OTU_1173	O_Sporidiobolales	0.0000	0.0000	0.0000	0.0000	0.0022	0.0010	0.0000	0.0000	0.0000	0.0000	0.0000	0.0000	0.0013	0.0000	0.0000	0.0000	0.0000	0.0000	0.0000	0.0000	0.0000	0.0012	0.0000	0.0000	0.0000	0.0000	0.0000	0.0000	0.0011	0.0000	0.0000	0.0000
OTU_1174	D_Fungi	0.0000	0.0000	0.0000	0.0000	0.0022	0.0010	0.0000	0.0022	0.0000	0.0000	0.0000	0.0000	0.0000	0.0000	0.0009	0.0010	0.0000	0.0000	0.0000	0.0000	0.0015	0.0000	0.0015	0.0000	0.0000	0.0000	0.0000	0.0000	0.0011	0.0000	0.0000	0.0000
OTU_1175	F_Pyronemataceae	0.0010	0.0000	0.0000	0.0013	0.0033	0.0010	0.0000	0.0000	0.0000	0.0000	0.0000	0.0000	0.0013	0.0000	0.0000	0.0000	0.0000	0.0000	0.0000	0.0000	0.0000	0.0000	0.0000	0.0000	0.0000	0.0000	0.0000	0.0000	0.0000	0.0000	0.0000	0.0000
OTU_1176	G_Coprinellus	0.0020	0.0009	0.0000	0.0013	0.0022	0.0029	0.0000	0.0000	0.0020	0.0000	0.0009	0.0027	0.0000	0.0000	0.0000	0.0000	0.0000	0.0010	0.0013	0.0000	0.0000	0.0000	0.0000	0.0015	0.0041	0.0000	0.0000	0.0010	0.0011	0.0010	0.0000	0.0000
OTU_1177	D_Fungi	0.0000	0.0000	0.0000	0.0000	0.0022	0.0000	0.0008	0.0000	0.0000	0.0000	0.0000	0.0000	0.0000	0.0000	0.0000	0.0010	0.0000	0.0000	0.0000	0.0000	0.0000	0.0000	0.0000	0.0000	0.0000	0.0000	0.0000	0.0000	0.0000	0.0000	0.0000	0.0000
OTU_1178	D_Fungi	0.0010	0.0000	0.0000	0.0000	0.0022	0.0000	0.0000	0.0000	0.0010	0.0000	0.0009	0.0000	0.0000	0.0000	0.0000	0.0000	0.0011	0.0000	0.0000	0.0000	0.0000	0.0000	0.0000	0.0000	0.0000	0.0000	0.0000	0.0000	0.0000	0.0000	0.0000	0.0000
OTU_1179	D_Fungi	0.0000	0.0000	0.0000	0.0000	0.0056	0.0000	0.0000	0.0000	0.0000	0.0000	0.0000	0.0000	0.0000	0.0000	0.0000	0.0000	0.0000	0.0000	0.0000	0.0000	0.0000	0.0000	0.0000	0.0000	0.0000	0.0000	0.0000	0.0000	0.0000	0.0000	0.0000	0.0000
OTU_1180	D_Fungi	0.0000	0.0000	0.0000	0.0000	0.0022	0.0000	0.0000	0.0000	0.0010	0.0000	0.0019	0.0000	0.0000	0.0024	0.0018	0.0000	0.0000	0.0000	0.0000	0.0030	0.0000	0.0000	0.0000	0.0000	0.0014	0.0000	0.0000	0.0000	0.0011	0.0000	0.0072	0.0000
OTU_1181	G_Ramicandelaber	0.0000	0.0000	0.0000	0.0000	0.0044	0.0000	0.0017	0.0000	0.0000	0.0012	0.0000	0.0000	0.0013	0.0000	0.0000	0.0000	0.0077	0.0000	0.0013	0.0000	0.0015	0.0012	0.0029	0.0000	0.0014	0.0000	0.0000	0.0000	0.0023	0.0010	0.0000	0.0019
OTU_1182	D_Fungi	0.0030	0.0028	0.0012	0.0000	0.0033	0.0000	0.0008	0.0000	0.0000	0.0000	0.0000	0.0000	0.0000	0.0012	0.0000	0.0000	0.0000	0.0000	0.0000	0.0000	0.0000	0.0000	0.0000	0.0000	0.0000	0.0000	0.0000	0.0000	0.0000	0.0000	0.0000	0.0000
OTU_1183	D_Fungi	0.0000	0.0000	0.0000	0.0000	0.0000	0.0000	0.0000	0.0000	0.0030	0.0000	0.0000	0.0000	0.0000	0.0000	0.0000	0.0041	0.0000	0.0000	0.0000	0.0000	0.0000	0.0000	0.0000	0.0000	0.0000	0.0000	0.0000	0.0000	0.0000	0.0000	0.0000	0.0000
OTU_1184	D_Fungi	0.0000	0.0000	0.0000	0.0000	0.0000	0.0000	0.0000	0.0000	0.0000	0.0000	0.0000	0.0000	0.0000	0.0024	0.0000	0.0000	0.0000	0.0000	0.0000	0.0000	0.0000	0.0000	0.0000	0.0000	0.0000	0.0000	0.0017	0.0000	0.0000	0.0000	0.0009	0.0000
OTU_1185	D_Fungi	0.0000	0.0000	0.0000	0.0000	0.0000	0.0000	0.0000	0.0022	0.0010	0.0000	0.0000	0.0000	0.0000	0.0024	0.0000	0.0010	0.0033	0.0010	0.0027	0.0000	0.0015	0.0012	0.0073	0.0030	0.0082	0.0016	0.0000	0.0000	0.0011	0.0010	0.0027	0.0019
OTU_1186	D_Fungi	0.0040	0.0000	0.0000	0.0000	0.0000	0.0000	0.0017	0.0032	0.0020	0.0000	0.0000	0.0000	0.0000	0.0024	0.0009	0.0000	0.0000	0.0000	0.0000	0.0000	0.0000	0.0012	0.0000	0.0000	0.0014	0.0000	0.0000	0.0000	0.0000	0.0000	0.0000	0.0019
OTU_1187	G_Conocybe	0.0000	0.0000	0.0000	0.0000	0.0000	0.0000	0.0000	0.0000	0.0000	0.0000	0.0000	0.0000	0.0000	0.0037	0.0000	0.0000	0.0000	0.0000	0.0000	0.0000	0.0000	0.0000	0.0000	0.0000	0.0000	0.0000	0.0000	0.0000	0.0000	0.0000	0.0000	0.0000
OTU_1188	D_Fungi	0.0000	0.0000	0.0000	0.0000	0.0011	0.0000	0.0000	0.0000	0.0000	0.0000	0.0000	0.0013	0.0000	0.0024	0.0000	0.0000	0.0011	0.0000	0.0000	0.0000	0.0000	0.0000	0.0015	0.0000	0.0000	0.0000	0.0000	0.0000	0.0000	0.0000	0.0000	0.0000
OTU_1189	D_Fungi	0.0000	0.0000	0.0000	0.0000	0.0000	0.0000	0.0000	0.0000	0.0000	0.0000	0.0000	0.0000	0.0000	0.0024	0.0054	0.0000	0.0000	0.0000	0.0000	0.0000	0.0000	0.0000	0.0000	0.0000	0.0000	0.0000	0.0000	0.0000	0.0011	0.0010	0.0000	0.0000
OTU_1190	G_Typhula	0.0000	0.0000	0.0000	0.0000	0.0000	0.0000	0.0008	0.0000	0.0000	0.0000	0.0000	0.0000	0.0026	0.0000	0.4338	0.0000	0.0000	0.0000	0.0000	0.0000	0.0000	0.0000	0.0000	0.0000	0.0000	0.0000	0.0000	0.0000	0.0000	0.0000	0.0000	0.0000
OTU_1191	C_Agaricomycetes	0.0000	0.0000	0.0000	0.0000	0.0011	0.0000	0.0008	0.0000	0.0000	0.0000	0.0000	0.0000	0.0000	0.0037	0.0000	0.0000	0.0000	0.0000	0.0000	0.0000	0.0029	0.0000	0.0000	0.0000	0.0014	0.0000	0.0000	0.0019	0.0034	0.0000	0.0000	0.0000
OTU_1192	D_Fungi	0.0030	0.0000	0.0000	0.0025	0.0000	0.0010	0.0008	0.0011	0.0000	0.0025	0.0056	0.0054	0.0026	0.0024	0.0000	0.0020	0.0022	0.0010	0.0013	0.0104	0.0044	0.0012	0.0204	0.0105	0.0027	0.0016	0.0000	0.0010	0.0023	0.0020	0.0000	0.0095
OTU_1193	D_Fungi	0.0069	0.0000	0.0000	0.0000	0.0000	0.0000	0.0000	0.0000	0.0000	0.0000	0.0000	0.0000	0.0000	0.0000	0.0000	0.0000	0.0000	0.0010	0.0000	0.0000	0.0000	0.0000	0.0000	0.0000	0.0014	0.0000	0.0000	0.0010	0.0011	0.0000	0.0009	0.0000
OTU_1194	D_Fungi	0.0050	0.0000	0.0012	0.0000	0.0000	0.0000	0.0000	0.0000	0.0000	0.0000	0.0000	0.0000	0.0000	0.0000	0.0000	0.0000	0.0000	0.0000	0.0000	0.0000	0.0000	0.0000	0.0000	0.0000	0.0000	0.0000	0.0000	0.0000	0.0000	0.0000	0.0000	0.0000
OTU_1195	D_Fungi	0.0020	0.0000	0.0000	0.0000	0.0000	0.0010	0.0000	0.0011	0.0030	0.0000	0.0000	0.0013	0.0000	0.0000	0.0000	0.0010	0.0000	0.0010	0.0013	0.0030	0.0000	0.0000	0.0029	0.0045	0.0014	0.0000	0.0000	0.0010	0.0000	0.0000	0.0000	0.0000
OTU_1196	D_Fungi	0.0000	0.0000	0.0000	0.0000	0.0000	0.0000	0.0000	0.0000	0.0000	0.0000	0.0000	0.0000	0.0000	0.0024	0.0000	0.0000	0.0000	0.0000	0.0000	0.0000	0.0000	0.0000	0.0000	0.0000	0.0000	0.0000	0.0000	0.0000	0.0000	0.0010	0.0000	0.0000
OTU_1197	P_Ascomycota	0.0000	0.0000	0.0000	0.0000	0.0000	0.0000	0.0000	0.0011	0.0000	0.0000	0.0000	0.0040	0.0026	0.0012	0.0081	0.0000	0.0000	0.0000	0.0000	0.0000	0.0000	0.0000	0.0000	0.0000	0.0000	0.0000	0.0000	0.0000	0.0000	0.0000	0.0000	0.0000
OTU_1198	P_Glomeromycota	0.0030	0.0000	0.0000	0.0000	0.0011	0.0000	0.0000	0.0000	0.0080	0.0000	0.0000	0.0000	0.0000	0.0000	0.0063	0.0000	0.0000	0.0000	0.0000	0.0000	0.0000	0.0000	0.0000	0.0000	0.0054	0.0000	0.0000	0.0000	0.0000	0.0010	0.0000	0.0645
OTU_1199	G_Claroideoglomus	0.0000	0.0000	0.0000	0.0000	0.0011	0.0000	0.0000	0.0000	0.0010	0.0000	0.0047	0.0000	0.0116	0.0000	0.0108	0.0000	0.0000	0.0000	0.0000	0.0000	0.0000	0.0000	0.0000	0.0000	0.0000	0.0000	0.0000	0.0000	0.0000	0.0000	0.0000	0.0038
OTU_1200	G_Mortierella	0.0000	0.0000	0.0000	0.0000	0.0000	0.0000	0.0000	0.0000	0.0000	0.0012	0.0009	0.0000	0.0000	0.0000	0.0072	0.0000	0.0000	0.0000	0.0000	0.0000	0.0000	0.0000	0.0117	0.0015	0.0000	0.0016	0.0000	0.0000	0.0000	0.0000	0.0000	0.0000
OTU_1201	P_Ascomycota	0.0000	0.0000	0.0000	0.0000	0.0000	0.0000	0.0000	0.0000	0.0000	0.0000	0.0000	0.0000	0.0000	0.0000	0.0072	0.0000	0.0000	0.0000	0.0040	0.0045	0.0000	0.0000	0.0044	0.0120	0.0000	0.0000	0.0000	0.0000	0.0000	0.0167	0.0000	0.0000
OTU_1202	D_Fungi	0.0000	0.0000	0.0000	0.0000	0.0000	0.0000	0.0000	0.0000	0.0000	0.0000	0.0000	0.0000	0.0013	0.0012	0.0090	0.0000	0.0000	0.0000	0.0000	0.0000	0.0000	0.0000	0.0000	0.0000	0.0000	0.0000	0.0000	0.0000	0.0057	0.0020	0.0018	0.0019
OTU_1203	G_Phaeosphaeria	0.0000	0.0000	0.0000	0.0000	0.0000	0.0000	0.0000	0.0000	0.0000	0.0000	0.0000	0.0000	0.0013	0.0000	0.0045	0.0000	0.0000	0.0000	0.0000	0.0000	0.0000	0.0000	0.0000	0.0000	0.0000	0.0000	0.0000	0.0000	0.0000	0.0000	0.0000	0.0000
OTU_1204	P_Ascomycota	0.0000	0.0009	0.0000	0.0000	0.0000	0.0000	0.0000	0.0000	0.0000	0.0000	0.0000	0.0013	0.0000	0.0000	0.0045	0.0000	0.0033	0.0000	0.0081	0.0104	0.0015	0.0000	0.0015	0.0015	0.0000	0.0016	0.0000	0.0000	0.0000	0.0000	0.0000	0.0000
OTU_1205	D_Fungi	0.0000	0.0000	0.0000	0.0000	0.0000	0.0000	0.0000	0.0000	0.0000	0.0000	0.0000	0.0000	0.0000	0.0000	0.0090	0.0000	0.0000	0.0000	0.0000	0.0000	0.0087	0.0000	0.0000	0.0000	0.0000	0.0016	0.0000	0.0000	0.0000	0.0000	0.0000	0.0000
OTU_1206	G_Basidiobolus	0.0000	0.0000	0.0000	0.0000	0.0000	0.0000	0.0000	0.0000	0.0110	0.0000	0.0000	0.0000	0.0000	0.0037	0.0000	0.0000	0.0000	0.0000	0.0000	0.0000	0.0000	0.0000	0.0000	0.0000	0.0000	0.0000	0.0000	0.0000	0.0000	0.0000	0.0000	0.0948
OTU_1207	D_Fungi	0.0000	0.0000	0.0000	0.0000	0.0000	0.0000	0.0000	0.0000	0.0010	0.0037	0.0019	0.0000	0.0039	0.0049	0.0009	0.0000	0.0000	0.0000	0.0000	0.0000	0.0000	0.0000	0.0000	0.0000	0.0041	0.0000	0.0085	0.0000	0.0307	0.0098	0.0000	0.0000
OTU_1208	D_Fungi	0.0000	0.0000	0.0000	0.0013	0.0000	0.0010	0.0000	0.0000	0.0040	0.0025	0.0019	0.0013	0.0000	0.0024	0.0000	0.0000	0.0000	0.0000	0.0013	0.0000	0.0000	0.0000	0.0029	0.0000	0.0054	0.0000	0.0000	0.0019	0.0000	0.0010	0.0000	0.0000
OTU_1209	D_Fungi	0.0000	0.0000	0.0000	0.0000	0.0000	0.0000	0.0000	0.0000	0.0000	0.0000	0.0000	0.0000	0.0013	0.0037	0.0009	0.0000	0.0000	0.0000	0.0000	0.0000	0.0000	0.0000	0.0000	0.0000	0.0014	0.0000	0.0000	0.0000	0.0000	0.0010	0.0009	0.0000
OTU_1210	G_Tranzscheliella	0.0000	0.0000	0.0012	0.0000	0.0011	0.0000	0.0000	0.0000	0.0000	0.0000	0.0009	0.0000	0.0000	0.0024	0.0009	0.0000	0.0000	0.0010	0.0000	0.0000	0.0015	0.0000	0.0000	0.0000	0.0000	0.0000	0.0000	0.0000	0.0000	0.0000	0.0000	0.0000
OTU_1211	D_Fungi	0.0000	0.0000	0.0000	0.0000	0.0000	0.0000	0.0000	0.0000	0.0000	0.0000	0.0000	0.0000	0.0000	0.0024	0.0000	0.0000	0.0000	0.0000	0.0000	0.0000	0.0000	0.0000	0.0000	0.0000	0.0000	0.0000	0.0000	0.0000	0.0000	0.0000	0.0000	0.0000
OTU_1212	D_Fungi	0.0000	0.0000	0.0000	0.0000	0.0000	0.0000	0.0000	0.0000	0.0000	0.0000	0.0000	0.0000	0.0000	0.0024	0.0000	0.0000	0.0000	0.0000	0.0000	0.0000	0.0000	0.0000	0.0000	0.0000	0.0000	0.0000	0.0000	0.0000	0.0000	0.0000	0.0000	0.0000
OTU_1213	D_Fungi	0.0079	0.0000	0.0000	0.0000	0.0000	0.0000	0.0000	0.0000	0.0000	0.0012	0.0000	0.0013	0.0000	0.0000	0.0000	0.0000	0.0000	0.0000	0.0000	0.0000	0.0000	0.0000	0.0015	0.0030	0.0000	0.0000	0.0000	0.0000	0.0000	0.0000	0.0000	0.0000
OTU_1214	G_Schizothecium	0.0079	0.0000	0.0000	0.0000	0.0000	0.0000	0.0000	0.0000	0.0000	0.0000	0.0000	0.0000	0.0000	0.0000	0.0000	0.0000	0.0000	0.0000	0.0000	0.0000	0.0000	0.0000	0.0000	0.0000	0.0000	0.0000	0.0000	0.0010	0.0000	0.0000	0.0000	0.0000
OTU_1215	F_Pichiaceae	0.0040	0.0000	0.0000	0.0000	0.0000	0.0000	0.0000	0.0000	0.0000	0.0000	0.0000	0.0000	0.0000	0.0000	0.0000	0.0000	0.0000	0.0000	0.0000	0.0000	0.0000	0.0000	0.0000	0.0000	0.0000	0.0000	0.0000	0.0000	0.0000	0.0000	0.0000	0.0000
OTU_1216	D_Fungi	0.0030	0.0009	0.0000	0.0000	0.0000	0.0000	0.0000	0.0000	0.0010	0.0012	0.0000	0.0000	0.0000	0.0000	0.0000	0.0010	0.0000	0.0000	0.0000	0.0000	0.0000	0.0000	0.0000	0.0000	0.0000	0.0000	0.0000	0.0010	0.0000	0.0000	0.0000	0.0000
OTU_1217	D_Fungi	0.0020	0.0000	0.0000	0.0000	0.0022	0.0000	0.0000	0.0032	0.0000	0.0012	0.0000	0.0000	0.0013	0.0012	0.0000	0.0000	0.0000	0.0000	0.0000	0.0000	0.0000	0.0000	0.0000	0.0000	0.0000	0.0000	0.0000	0.0000	0.0000	0.0000	0.0000	0.0000
OTU_1218	D_Fungi	0.0030	0.0000	0.0000	0.0000	0.0000	0.0000	0.0000	0.0000	0.0000	0.0000	0.0000	0.0000	0.0000	0.0000	0.0009	0.0000	0.0000	0.0000	0.0000	0.0000	0.0000	0.0000	0.0000	0.0000	0.0000	0.0000	0.0000	0.0000	0.0000	0.0000	0.0000	0.0000
OTU_1219	O_Entomophthorales	0.0020	0.0000	0.0000	0.0000	0.0000	0.0000	0.0000	0.0000	0.0000	0.0000	0.0000	0.0000	0.0000	0.0000	0.0000	0.0000	0.0000	0.0000	0.0000	0.0000	0.0000	0.0000	0.0000	0.0000	0.0000	0.0000	0.0000	0.0000	0.0000	0.0000	0.0000	0.0000
OTU_1220	D_Fungi	0.0040	0.0000	0.0000	0.0000	0.0000	0.0000	0.0000	0.0000	0.0000	0.0000	0.0000	0.0000	0.0000	0.0000	0.0000	0.0051	0.0000	0.0000	0.0000	0.0000	0.0000	0.0000	0.0000	0.0000	0.0014	0.0000	0.0000	0.0000	0.0000	0.0000	0.0000	0.0000
OTU_1221	D_Fungi	0.0218	0.0028	0.0012	0.0025	0.0056	0.0019	0.0017	0.0043	0.0010	0.0075	0.0121	0.0081	0.0026	0.0024	0.0009	0.0041	0.0011	0.0020	0.0000	0.0000	0.0029	0.0037	0.0000	0.0000	0.0027	0.0094	0.0000	0.0057	0.0068	0.0148	0.0109	0.0000
OTU_1222	D_Fungi	0.0020	0.0000	0.0000	0.0000	0.0000	0.0000	0.0000	0.0000	0.0000	0.0000	0.0000	0.0000	0.0000	0.0000	0.0000	0.0000	0.0000	0.0000	0.0000	0.0000	0.0000	0.0000	0.0015	0.0000	0.0000	0.0000	0.0170	0.0000	0.0011	0.0000	0.0000	0.0000
OTU_1223	D_Fungi	0.0069	0.0009	0.0012	0.0051	0.0022	0.0010	0.0000	0.0000	0.0030	0.0000	0.0000	0.0040	0.0039	0.0024	0.0009	0.0010	0.0066	0.0010	0.0000	0.0000	0.0015	0.0000	0.0073	0.0075	0.0000	0.0000	0.0000	0.0095	0.0023	0.0020	0.0009	0.0000
OTU_1224	D_Fungi	0.0020	0.0000	0.0000	0.0000	0.0000	0.0000	0.0000	0.0000	0.0000	0.0000	0.0000	0.0000	0.0000	0.0000	0.0000	0.0000	0.0000	0.0000	0.0000	0.0000	0.0000	0.0000	0.0000	0.0000	0.0000	0.0000	0.0000	0.0000	0.0000	0.0000	0.0000	0.0000
OTU_1225	G_Conidiobolus	0.0099	0.0000	0.0000	0.0000	0.0000	0.0000	0.0000	0.0000	0.0000	0.0000	0.0000	0.0000	0.0000	0.0000	0.0000	0.0000	0.0000	0.0000	0.0000	0.0000	0.0000	0.0000	0.0000	0.0030	0.0014	0.0000	0.0000	0.0010	0.0000	0.0020	0.0000	0.0000
OTU_1226	G_Volvariella	0.0040	0.0000	0.0000	0.0000	0.0000	0.0000	0.0000	0.0000	0.0000	0.0000	0.0000	0.0000	0.0000	0.0000	0.0000	0.0000	0.0000	0.0000	0.0000	0.0000	0.0000	0.0000	0.0000	0.0000	0.0000	0.0000	0.0000	0.0000	0.0000	0.0000	0.0000	0.0000
OTU_1227	C_Agaricomycetes	0.0099	0.0000	0.0000	0.0000	0.0000	0.0000	0.0000	0.0000	0.0000	0.0000	0.0000	0.0000	0.0000	0.0000	0.0000	0.0000	0.0000	0.0000	0.0000	0.0000	0.0000	0.0000	0.0000	0.0000	0.0000	0.0000	0.0000	0.0000	0.0000	0.0000	0.0000	0.0000
OTU_1228	P_Basidiomycota	0.0040	0.0000	0.0000	0.0013	0.0000	0.0000	0.0017	0.0022	0.0000	0.0000	0.0000	0.0000	0.0000	0.0000	0.0000	0.0000	0.0000	0.0000	0.0000	0.0000	0.0000	0.0000	0.0000	0.0000	0.0000	0.0000	0.0000	0.0000	0.0000	0.0000	0.0000	0.0000
OTU_1229	D_Fungi	0.0000	0.0000	0.0000	0.0000	0.0000	0.0000	0.0000	0.0000	0.0000	0.0000	0.0000	0.0000	0.0013	0.0000	0.0000	0.0000	0.0000	0.0000	0.0121	0.0015	0.0000	0.0000	0.0000	0.0015	0.0000	0.0000	0.0000	0.0000	0.0000	0.0000	0.0000	0.0000
OTU_1230	D_Fungi	0.0000	0.0000	0.0000	0.0000	0.0000	0.0000	0.0000	0.0000	0.0030	0.0000	0.0000	0.0040	0.0000	0.0000	0.0000	0.0010	0.0011	0.0060	0.0296	0.0208	0.0000	0.0000	0.0044	0.0045	0.0027	0.0016	0.0017	0.0000	0.0080	0.0010	0.0009	0.0038
OTU_1231	D_Fungi	0.0010	0.0000	0.0000	0.0000	0.0000	0.0000	0.0000	0.0000	0.0020	0.0000	0.0000	0.0040	0.0000	0.0000	0.0000	0.0000	0.0132	0.0000	0.0215	0.0060	0.0044	0.0012	0.0015	0.0060	0.0054	0.0016	0.0017	0.0010	0.0023	0.0010	0.0027	0.0019
OTU_1232	D_Fungi	0.0000	0.0000	0.0012	0.0000	0.0000	0.0000	0.0000	0.0000	0.0010	0.0000	0.0019	0.0013	0.0013	0.0256	0.0000	0.0000	0.0011	0.0000	0.0081	0.0000	0.0000	0.0000	0.0015	0.0000	0.0014	0.0031	0.0068	0.0038	0.0011	0.0000	0.0009	0.0000
OTU_1233	G_Cystofilobasidium	0.0000	0.0000	0.0000	0.0000	0.0000	0.0000	0.0000	0.0000	0.0000	0.0012	0.0000	0.0000	0.0000	0.0073	0.0000	0.0000	0.0000	0.0030	0.0000	0.0000	0.0015	0.0000	0.0015	0.0045	0.0000	0.0000	0.0000	0.0000	0.0000	0.0010	0.0009	0.0000
OTU_1234	G_Articulospora	0.0000	0.0000	0.0000	0.0000	0.0000	0.0000	0.0000	0.0000	0.0000	0.0000	0.0000	0.0000	0.0000	0.0085	0.0000	0.0000	0.0000	0.0000	0.0000	0.0000	0.0000	0.0000	0.0000	0.0000	0.0000	0.0000	0.0000	0.0000	0.0000	0.0000	0.0009	0.0000
OTU_1235	G_Coniophora	0.0000	0.0000	0.0000	0.0000	0.0000	0.0000	0.0000	0.0000	0.0000	0.0000	0.0000	0.0000	0.0000	0.0085	0.0000	0.0000	0.0000	0.0000	0.0013	0.0000	0.0000	0.0000	0.0000	0.0000	0.0000	0.0000	0.0000	0.0000	0.0000	0.0000	0.0000	0.0000
OTU_1236	G_Glomus	0.0000	0.0000	0.0000	0.0000	0.0011	0.0000	0.0000	0.0000	0.0000	0.0000	0.0000	0.0013	0.0000	0.0110	0.0000	0.0000	0.0000	0.0000	0.0000	0.0000	0.0000	0.0000	0.0000	0.0000	0.0000	0.0000	0.0000	0.0048	0.0068	0.0000	0.0009	0.0038
OTU_1237	D_Fungi	0.0000	0.0000	0.0000	0.0000	0.0000	0.0000	0.0000	0.0000	0.0000	0.0000	0.0000	0.0000	0.0000	0.0037	0.0000	0.0000	0.0000	0.0000	0.0000	0.0000	0.0000	0.0000	0.0000	0.0000	0.0000	0.0000	0.0000	0.0000	0.0000	0.0000	0.0000	0.0000
OTU_1238	G_Pyrenochaeta	0.0000	0.0000	0.0000	0.0000	0.0000	0.0000	0.0000	0.0000	0.0010	0.0000	0.0000	0.0000	0.0000	0.0000	0.0000	0.0000	0.0099	0.0000	0.0135	0.0000	0.0000	0.0000	0.0015	0.0045	0.0000	0.0000	0.0000	0.0000	0.0000	0.0000	0.0000	0.0000
OTU_1239	D_Fungi	0.0000	0.0000	0.0000	0.0000	0.0000	0.0000	0.0000	0.0000	0.0000	0.0000	0.0000	0.0000	0.0000	0.0000	0.0000	0.0000	0.0000	0.0000	0.0108	0.0000	0.0000	0.0012	0.0000	0.0000	0.0000	0.0000	0.0000	0.0000	0.0000	0.0000	0.0009	0.0000
OTU_1240	C_Agaricomycetes	0.0000	0.0000	0.0012	0.0114	0.0000	0.0000	0.0000	0.0000	0.0000	0.0012	0.0000	0.0094	0.0000	0.0000	0.0000	0.0000	0.0000	0.0000	0.0269	0.0015	0.0000	0.0000	0.0131	0.0000	0.0014	0.0000	0.0000	0.0048	0.0114	0.0059	0.0045	0.0038
OTU_1241	D_Fungi	0.0000	0.0000	0.0000	0.0000	0.0000	0.0000	0.0000	0.0000	0.0000	0.0000	0.0000	0.0000	0.0000	0.0000	0.0000	0.0000	0.0000	0.0000	0.0175	0.0000	0.0000	0.0000	0.0029	0.0000	0.0000	0.0000	0.0000	0.0000	0.0000	0.0000	0.0000	0.0000
OTU_1242	G_Peziza	0.0000	0.0000	0.0000	0.0000	0.0000	0.0000	0.0000	0.0000	0.0000	0.0000	0.0000	0.0000	0.0000	0.0195	0.0000	0.0000	0.0000	0.0000	0.0000	0.0015	0.0000	0.0000	0.0000	0.0000	0.0000	0.0000	0.0000	0.0000	0.0000	0.0000	0.0000	0.0000
OTU_1243	G_Peziza	0.0000	0.0000	0.0000	0.0000	0.0000	0.0000	0.0008	0.0011	0.0010	0.0000	0.0000	0.0000	0.0000	0.0183	0.0000	0.0000	0.0000	0.0000	0.0000	0.0000	0.0000	0.0000	0.0000	0.0000	0.0000	0.0000	0.0000	0.0000	0.0000	0.0000	0.0000	0.0000
OTU_1244	G_Candida	0.0000	0.0000	0.0000	0.0000	0.0000	0.0000	0.0000	0.0000	0.0000	0.0000	0.0000	0.0000	0.0000	0.0098	0.0000	0.0000	0.0000	0.0000	0.0000	0.0000	0.0000	0.0000	0.0000	0.0000	0.0000	0.0000	0.0000	0.0000	0.0000	0.0000	0.0000	0.0000
OTU_1245	P_Ascomycota	0.0000	0.0000	0.0000	0.0000	0.0000	0.0000	0.0000	0.0000	0.0000	0.0000	0.0000	0.0013	0.0000	0.0110	0.0000	0.0000	0.0000	0.0000	0.0000	0.0000	0.0000	0.0000	0.0000	0.0000	0.0000	0.0000	0.0848	0.0000	0.0000	0.0000	0.0000	0.0000
OTU_1246	P_Basidiomycota	0.0000	0.0000	0.0000	0.0000	0.0000	0.0000	0.0000	0.0000	0.0010	0.0000	0.0000	0.0000	0.0000	0.0317	0.0000	0.0000	0.0000	0.0000	0.0000	0.0000	0.0000	0.0000	0.0000	0.0000	0.0000	0.0000	0.0000	0.0000	0.0000	0.0000	0.0000	0.0000
OTU_1247	D_Fungi	0.0000	0.0000	0.0000	0.0000	0.0000	0.0000	0.0000	0.0000	0.0000	0.0000	0.0000	0.0000	0.0000	0.0000	0.0242	0.0000	0.0000	0.0000	0.0000	0.0000	0.0000	0.0000	0.0000	0.0000	0.0000	0.0000	0.0000	0.0000	0.0000	0.0000	0.0036	0.0000
OTU_1248	G_Discostroma	0.0000	0.0000	0.0000	0.0000	0.0000	0.0000	0.0000	0.0000	0.0000	0.0000	0.0000	0.0000	0.0000	0.0000	0.0197	0.0000	0.0000	0.0000	0.0000	0.0000	0.0000	0.0000	0.0015	0.0000	0.0000	0.0000	0.0000	0.0000	0.0000	0.0000	0.0000	0.0000
OTU_1249	P_Ascomycota	0.0000	0.0000	0.0000	0.0025	0.0000	0.0000	0.0000	0.0000	0.0000	0.0000	0.0000	0.0000	0.0000	0.0024	0.0179	0.0000	0.0000	0.0000	0.0000	0.0060	0.0000	0.0000	0.0175	0.0000	0.0000	0.0000	0.0017	0.0000	0.0045	0.0000	0.0000	0.0000
OTU_1250	D_Fungi	0.0030	0.0009	0.0000	0.0000	0.0000	0.0000	0.0000	0.0011	0.0030	0.0000	0.0000	0.0000	0.0000	0.0000	0.0000	0.0000	0.0011	0.0000	0.0000	0.0000	0.0000	0.0000	0.0000	0.0000	0.0000	0.0000	0.0000	0.0000	0.0000	0.0000	0.0000	0.0019
OTU_1251	D_Fungi	0.0000	0.0000	0.0000	0.0000	0.0000	0.0000	0.0000	0.0000	0.0000	0.0000	0.0000	0.0000	0.0000	0.0037	0.0000	0.0000	0.0000	0.0000	0.0000	0.0000	0.0000	0.0000	0.0000	0.0000	0.0000	0.0000	0.0000	0.0000	0.0000	0.0020	0.0000	0.0019
OTU_1252	D_Fungi	0.0000	0.0000	0.0000	0.0000	0.0000	0.0000	0.0000	0.0000	0.0000	0.0000	0.0000	0.0000	0.0000	0.0024	0.0000	0.0000	0.0000	0.0000	0.0000	0.0000	0.0000	0.0000	0.0000	0.0000	0.0000	0.0000	0.0000	0.0000	0.0000	0.0000	0.0000	0.0000
OTU_1253	D_Fungi	0.0000	0.0009	0.0000	0.0000	0.0000	0.0000	0.0000	0.0000	0.0020	0.0012	0.0000	0.0000	0.0000	0.0024	0.0000	0.0000	0.0000	0.0010	0.0000	0.0000	0.0000	0.0000	0.0000	0.0000	0.0000	0.0000	0.0000	0.0010	0.0011	0.0000	0.0000	0.0000
OTU_1254	O_Agaricales	0.0010	0.0009	0.0000	0.0000	0.0000	0.0000	0.0000	0.0000	0.0030	1.8094	0.0000	0.0013	0.0000	0.0146	0.0009	0.0000	0.0000	0.0000	0.0000	0.0000	0.0000	0.0000	0.0000	0.0000	0.0000	0.0016	0.0000	0.0000	0.0068	0.0344	0.0000	0.0019
OTU_1255	D_Fungi	0.0059	0.0000	0.0000	0.0000	0.0000	0.0000	0.0000	0.0011	0.0000	0.0000	0.0000	0.0000	0.0000	0.0000	0.0000	0.0000	0.0011	0.0000	0.0000	0.0000	0.0000	0.0000	0.0000	0.0000	0.0000	0.0000	0.0000	0.0000	0.0000	0.0000	0.0000	0.0000
OTU_1256	D_Fungi	0.0059	0.0000	0.0000	0.0000	0.0011	0.0000	0.0025	0.0022	0.0000	0.0012	0.0000	0.0000	0.0000	0.0012	0.0018	0.0000	0.0000	0.0000	0.0000	0.0000	0.0000	0.0012	0.0000	0.0000	0.0014	0.0016	0.0000	0.0000	0.0023	0.0020	0.0000	0.0000
OTU_1257	D_Fungi	0.0069	0.0028	0.0000	0.0013	0.0011	0.0010	0.0008	0.0022	0.0010	0.0012	0.0000	0.0000	0.0013	0.0000	0.0027	0.0000	0.0033	0.0000	0.0000	0.0000	0.0015	0.0000	0.0000	0.0000	0.0014	0.0016	0.0000	0.0000	0.0000	0.0010	0.0000	0.0000
OTU_1258	D_Fungi	0.0020	0.0000	0.0000	0.0000	0.0000	0.0000	0.0000	0.0000	0.0010	0.0000	0.0000	0.0000	0.0013	0.0000	0.0000	0.0000	0.0000	0.0000	0.0000	0.0000	0.0000	0.0000	0.0000	0.0000	0.0000	0.0000	0.0000	0.0000	0.0000	0.0000	0.0000	0.0000
OTU_1259	D_Fungi	0.0020	0.0000	0.0000	0.0013	0.0000	0.0000	0.0000	0.0022	0.0010	0.0000	0.0000	0.0000	0.0000	0.0000	0.0000	0.0000	0.0000	0.0000	0.0000	0.0000	0.0000	0.0000	0.0015	0.0015	0.0000	0.0016	0.0000	0.0019	0.0011	0.0049	0.0000	0.0038
OTU_1260	D_Fungi	0.0030	0.0000	0.0000	0.0000	0.0000	0.0000	0.0000	0.0000	0.0020	0.0000	0.0000	0.0000	0.0026	0.0000	0.0000	0.0000	0.0022	0.0000	0.0000	0.0000	0.0000	0.0000	0.0000	0.0000	0.0000	0.0000	0.0000	0.0000	0.0000	0.0000	0.0000	0.0019
OTU_1261	P_Ascomycota	0.0020	0.0000	0.0000	0.0000	0.0000	0.0000	0.0000	0.0000	0.0000	0.0000	0.0000	0.0000	0.0000	0.0000	0.0000	0.0000	0.0000	0.0000	0.0000	0.0000	0.0000	0.0000	0.0000	0.0000	0.0000	0.0000	0.0000	0.0000	0.0000	0.0000	0.0000	0.0000
OTU_1262	D_Fungi	0.0000	0.0000	0.0000	0.0000	0.0000	0.0000	0.0000	0.0000	0.0000	0.0037	0.0000	0.0000	0.0013	0.0012	0.0009	0.0000	0.0000	0.0000	0.0000	0.0000	0.0015	0.0000	0.0000	0.0000	0.0000	0.0000	0.0000	0.0000	0.0000	0.0000	0.0000	0.0000
OTU_1263	D_Fungi	0.0000	0.0000	0.0000	0.0000	0.0000	0.0000	0.0000	0.0000	0.0000	0.0025	0.0000	0.0000	0.0000	0.0000	0.0000	0.0000	0.0000	0.0000	0.0000	0.0000	0.0000	0.0000	0.0000	0.0000	0.0000	0.0000	0.0000	0.0000	0.0000	0.0000	0.0000	0.0000
OTU_1264	D_Fungi	0.0000	0.0000	0.0000	0.0000	0.0000	0.0000	0.0000	0.0000	0.0050	0.0050	0.0000	0.0000	0.0000	0.0000	0.0000	0.0000	0.0000	0.0000	0.0000	0.0000	0.0000	0.0000	0.0000	0.0000	0.0000	0.0016	0.0000	0.0000	0.0000	0.0000	0.0000	0.0000
OTU_1265	D_Fungi	0.0000	0.0000	0.0000	0.0000	0.0022	0.0000	0.0000	0.0000	0.0000	0.0025	0.0009	0.0000	0.0065	0.0049	0.0054	0.0000	0.0000	0.0000	0.0000	0.0000	0.0029	0.0000	0.0000	0.0000	0.0068	0.0016	0.0000	0.0019	0.0023	0.0059	0.0009	0.0076
OTU_1266	D_Fungi	0.0000	0.0000	0.0000	0.0000	0.0000	0.0010	0.0000	0.0000	0.0030	0.0025	0.0000	0.0000	0.0000	0.0000	0.0009	0.0000	0.0000	0.0010	0.0000	0.0000	0.0015	0.0000	0.0000	0.0000	0.0014	0.0000	0.0000	0.0000	0.0000	0.0000	0.0000	0.0000
OTU_1267	D_Fungi	0.0000	0.0000	0.0000	0.0000	0.0000	0.0000	0.0000	0.0000	0.0000	0.0025	0.0000	0.0013	0.0000	0.0012	0.0000	0.0010	0.0055	0.0000	0.0000	0.0000	0.0015	0.0000	0.0015	0.0000	0.0014	0.0000	0.0017	0.0000	0.0000	0.0010	0.0000	0.0019
OTU_1268	D_Fungi	0.0010	0.0000	0.0000	0.0000	0.0011	0.0000	0.0000	0.0032	0.0080	0.0075	0.0000	0.0323	0.0000	0.0000	0.0000	0.0020	0.0000	0.0000	0.0027	0.0015	0.0000	0.0012	0.0000	0.0030	0.0041	0.0000	0.0000	0.0010	0.0000	0.0000	0.0018	0.0019
OTU_1269	C_Agaricomycetes	0.0000	0.0000	0.0000	0.0000	0.0000	0.0000	0.0000	0.0000	0.0000	0.0124	0.0000	0.0000	0.0000	0.0000	0.0000	0.0000	0.0011	0.0070	0.0215	0.0000	0.0000	0.0000	0.0000	0.0000	0.0000	0.1159	0.0373	0.0010	0.0000	0.0000	0.0000	0.0000
OTU_1270	D_Fungi	0.0000	0.0000	0.0000	0.0000	0.0000	0.0000	0.0000	0.0000	0.0000	0.0050	0.0000	0.0000	0.0000	0.0000	0.0000	0.0000	0.0011	0.0000	0.0000	0.0744	0.0015	0.0000	0.0015	0.0000	0.0000	0.0000	0.0000	0.0000	0.0000	0.0000	0.0000	0.0000
OTU_1271	F_Onygenaceae	0.0030	0.0000	0.0000	0.0000	0.0000	0.0000	0.0008	0.0000	0.0000	0.0025	0.0000	0.0000	0.0039	0.0000	0.0009	0.0000	0.0011	0.0000	0.0027	0.0000	0.0015	0.0000	0.0015	0.0000	0.0014	0.0016	0.0000	0.0010	0.0000	0.0000	0.0009	0.0000
OTU_1272	D_Fungi	0.0000	0.0000	0.0000	0.0000	0.0000	0.0000	0.0000	0.0000	0.0000	0.0000	0.0000	0.0000	0.0000	0.0012	0.0027	0.0000	0.0000	0.0000	0.0000	0.0000	0.0000	0.0000	0.0000	0.0000	0.0000	0.0000	0.0000	0.0000	0.0000	0.0000	0.0000	0.0000
OTU_1273	D_Fungi	0.0000	0.0019	0.0000	0.0000	0.0000	0.0000	0.0000	0.0000	0.0000	0.0012	0.0009	0.0000	0.0000	0.0000	0.0018	0.0000	0.0000	0.0000	0.0000	0.0000	0.0000	0.0000	0.0000	0.0000	0.0000	0.0000	0.0000	0.0000	0.0000	0.0000	0.0000	0.0000
OTU_1274	D_Fungi	0.0000	0.0000	0.0000	0.0000	0.0000	0.0000	0.0000	0.0000	0.0000	0.0000	0.0000	0.0000	0.0039	0.0012	0.0018	0.0010	0.0000	0.0000	0.0000	0.0000	0.0000	0.0000	0.0000	0.0000	0.0000	0.0000	0.0000	0.0000	0.0023	0.0010	0.0000	0.0000
OTU_1275	D_Fungi	0.0000	0.0000	0.0000	0.0000	0.0000	0.0000	0.0000	0.0000	0.0000	0.0000	0.0009	0.0000	0.0000	0.0000	0.0018	0.0000	0.0000	0.0000	0.0000	0.0000	0.0000	0.0000	0.0000	0.0000	0.0000	0.0000	0.0000	0.0000	0.0000	0.0000	0.0000	0.0000
OTU_1276	G_Nectria	0.0000	0.0000	0.0000	0.0000	0.0000	0.0000	0.0000	0.0000	0.0000	0.0025	0.0000	0.0013	0.0000	0.0000	0.0000	0.0000	0.0000	0.0000	0.0000	0.0000	0.0000	0.0000	0.0000	0.0000	0.0000	0.0000	0.0000	0.0000	0.0000	0.0000	0.0009	0.0000
OTU_1277	G_Pilaira	0.0000	0.0000	0.0000	0.0000	0.0000	0.0000	0.0000	0.0000	0.0000	0.0025	0.0000	0.0000	0.0000	0.0000	0.0000	0.0000	0.0000	0.0000	0.0000	0.0000	0.0000	0.0000	0.0000	0.0000	0.0000	0.0000	0.0000	0.0000	0.0000	0.0000	0.0000	0.0000
OTU_1278	O_Chaetothyriales	0.0000	0.0000	0.0000	0.0000	0.0000	0.0000	0.0000	0.0000	0.0010	0.0025	0.0000	0.0000	0.0000	0.0000	0.0000	0.0000	0.0000	0.0000	0.0000	0.0000	0.0000	0.0000	0.0000	0.0000	0.0000	0.0000	0.0000	0.0000	0.0000	0.0000	0.0000	0.0000
OTU_1279	D_Fungi	0.0000	0.0000	0.0000	0.0000	0.0000	0.0000	0.0000	0.0000	0.0000	0.0050	0.0000	0.0000	0.0000	0.0000	0.0000	0.0000	0.0000	0.0000	0.0000	0.0000	0.0000	0.0000	0.0000	0.0000	0.0000	0.0000	0.0000	0.0000	0.0000	0.0000	0.0000	0.0057
OTU_1280	D_Fungi	0.0010	0.0000	0.0000	0.0000	0.0000	0.0010	0.0000	0.0000	0.0060	0.0273	0.0326	0.0000	0.0013	0.0000	0.0000	0.0000	0.0000	0.0010	0.0000	0.0000	0.0000	0.0000	0.0044	0.0000	0.0000	0.0000	0.0034	0.0000	0.0023	0.0138	0.0199	0.0019
OTU_1281	F_Diversisporaceae	0.0000	0.0000	0.0000	0.0000	0.0000	0.0000	0.0000	0.0000	0.0000	0.0012	0.0103	0.0000	0.0000	0.0000	0.0009	0.0000	0.0000	0.0000	0.0000	0.0000	0.0000	0.0000	0.0000	0.0000	0.0014	0.0000	0.0000	0.0019	0.0000	0.0000	0.0000	0.0000
OTU_1282	D_Fungi	0.0000	0.0000	0.0000	0.0000	0.0000	0.0000	0.0000	0.0000	0.0000	0.0025	0.0000	0.0000	0.0000	0.0000	0.0000	0.0000	0.0000	0.0000	0.0000	0.0000	0.0000	0.0000	0.0000	0.0000	0.0000	0.0000	0.0000	0.0000	0.0000	0.0000	0.0000	0.0000
OTU_1283	D_Fungi	0.0000	0.0000	0.0000	0.0000	0.0000	0.0000	0.0000	0.0000	0.0000	0.0025	0.0000	0.0108	0.0000	0.0024	0.0000	0.0010	0.0000	0.0000	0.0000	0.0000	0.0000	0.0000	0.0000	0.0000	0.0000	0.0000	0.0000	0.0000	0.0000	0.0000	0.0000	0.0000
OTU_1284	D_Fungi	0.0000	0.0000	0.0000	0.0000	0.0000	0.0000	0.0000	0.0000	0.0000	0.0025	0.0000	0.0000	0.0000	0.0000	0.0000	0.0000	0.0000	0.0000	0.0000	0.0000	0.0000	0.0000	0.0000	0.0000	0.0000	0.0000	0.0000	0.0000	0.0000	0.0000	0.0000	0.0000
OTU_1285	D_Fungi	0.0000	0.0000	0.0000	0.0000	0.0000	0.0000	0.0000	0.0000	0.0000	0.0099	0.0000	0.0013	0.0000	0.0000	0.0000	0.0000	0.0000	0.0000	0.0054	0.0015	0.0000	0.0000	0.0029	0.0000	0.0122	0.0016	0.0034	0.0105	0.0000	0.0000	0.0000	0.0000
OTU_1286	D_Fungi	0.0000	0.0000	0.0000	0.0000	0.0000	0.0000	0.0000	0.0000	0.0000	0.0037	0.0000	0.0000	0.0000	0.0000	0.0000	0.0000	0.0000	0.0000	0.0000	0.0000	0.0000	0.0000	0.0000	0.0000	0.0014	0.0000	0.0000	0.0000	0.0466	0.0010	0.0000	0.0000
OTU_1287	P_Ascomycota	0.0000	0.0000	0.0000	0.0000	0.0000	0.0000	0.0000	0.0000	0.0000	0.0037	0.0000	0.0000	0.0000	0.0000	0.0000	0.0000	0.0000	0.0000	0.0000	0.0000	0.0000	0.0000	0.0000	0.0000	0.0000	0.0000	0.0000	0.0000	0.0000	0.0000	0.0000	0.0000
OTU_1288	D_Fungi	0.0000	0.0000	0.0000	0.0000	0.0000	0.0000	0.0000	0.0000	0.0000	0.0037	0.0000	0.0000	0.0000	0.0000	0.0000	0.0000	0.0000	0.0000	0.0000	0.0000	0.0000	0.0000	0.0000	0.0000	0.0000	0.0000	0.0000	0.0000	0.0000	0.0010	0.0000	0.0000
OTU_1289	D_Fungi	0.0020	0.0000	0.0000	0.0013	0.0000	0.0000	0.0000	0.0011	0.0060	0.0037	0.0000	0.0000	0.0013	0.0012	0.0000	0.0000	0.0000	0.0000	0.0027	0.0149	0.0000	0.0000	0.0015	0.0000	0.0027	0.0031	0.0017	0.0019	0.0000	0.0000	0.0000	0.0171
OTU_1290	G_Preussia	0.0000	0.0000	0.0000	0.0000	0.0000	0.0000	0.0000	0.0000	0.0000	0.0025	0.0000	0.0000	0.0000	0.0000	0.0000	0.0010	0.0000	0.0000	0.0054	0.0000	0.0000	0.0000	0.0000	0.0000	0.0000	0.0000	0.0000	0.0000	0.0000	0.0000	0.0000	0.0000
OTU_1291	D_Fungi	0.0000	0.0000	0.0000	0.0000	0.0000	0.0000	0.0000	0.0011	0.0010	0.0012	0.0000	0.0013	0.0013	0.0000	0.0018	0.0000	0.0000	0.0000	0.0000	0.0000	0.0000	0.0000	0.0015	0.0015	0.0000	0.0016	0.0068	0.0019	0.0000	0.0039	0.0018	0.0019
OTU_1292	D_Fungi	0.0000	0.0000	0.0000	0.0000	0.0000	0.0000	0.0000	0.0000	0.0000	0.0000	0.0000	0.0000	0.0000	0.0000	0.0018	0.0000	0.0000	0.0000	0.0000	0.0000	0.0000	0.0000	0.0000	0.0000	0.0000	0.0000	0.0000	0.0000	0.0000	0.0000	0.0000	0.0000
OTU_1293	D_Fungi	0.0020	0.0000	0.0000	0.0000	0.0000	0.0000	0.0000	0.0000	0.0010	0.0012	0.0000	0.0000	0.0000	0.0000	0.0018	0.0000	0.0000	0.0000	0.0000	0.0000	0.0000	0.0000	0.0000	0.0000	0.0000	0.0016	0.0017	0.0010	0.0023	0.0000	0.0009	0.0000
OTU_1294	G_Ceratobasidium	0.0000	0.0000	0.0000	0.0000	0.0000	0.0000	0.0000	0.0000	0.0000	0.0000	0.0000	0.0000	0.0000	0.0000	0.0036	0.0000	0.0000	0.0000	0.0000	0.0000	0.0000	0.0000	0.0000	0.0000	0.0000	0.0000	0.0000	0.0000	0.0000	0.0000	0.0000	0.0000
OTU_1295	P_Glomeromycota	0.0000	0.0000	0.0000	0.0000	0.0000	0.0000	0.0000	0.0000	0.0080	0.0000	0.0009	0.0000	0.0013	0.0000	0.0036	0.0000	0.0000	0.0000	0.0000	0.0000	0.0000	0.0000	0.0000	0.0000	0.0000	0.0016	0.0000	0.0000	0.0000	0.0000	0.0000	0.0000
OTU_1296	G_Ceratobasidium	0.0000	0.0000	0.0000	0.0000	0.0000	0.0000	0.0000	0.0000	0.0000	0.0000	0.0000	0.0000	0.0000	0.0000	0.0018	0.0000	0.0000	0.0000	0.0000	0.0000	0.0000	0.0000	0.0000	0.0000	0.0000	0.0000	0.0017	0.0000	0.0000	0.0000	0.0000	0.0000
OTU_1297	D_Fungi	0.0000	0.0000	0.0012	0.0000	0.0011	0.0000	0.0025	0.0000	0.0020	0.0012	0.0065	0.0000	0.0000	0.0012	0.0063	0.0020	0.0033	0.0000	0.0000	0.0000	0.0000	0.0000	0.0000	0.0000	0.0027	0.0000	0.0000	0.0000	0.0000	0.0000	0.0009	0.0000
OTU_1298	D_Fungi	0.0000	0.0009	0.0000	0.0000	0.0000	0.0000	0.0000	0.0000	0.0020	0.0000	0.0000	0.0054	0.0000	0.0000	0.0009	0.0041	0.0000	0.0000	0.0000	0.0015	0.0000	0.0000	0.0000	0.0000	0.0000	0.0000	0.0000	0.0000	0.0000	0.0000	0.0000	0.0000
OTU_1299	F_Orbiliaceae	0.0000	0.0000	0.0000	0.0000	0.0000	0.0000	0.0000	0.0000	0.0000	0.0000	0.0000	0.0000	0.0000	0.0000	0.0000	0.0041	0.0000	0.0000	0.0000	0.0000	0.0000	0.0000	0.0102	0.0000	0.0000	0.0000	0.0000	0.0000	0.0000	0.0000	0.0000	0.0000
OTU_1300	G_Diversispora	0.0000	0.0000	0.0000	0.0000	0.0033	0.0000	0.0000	0.0000	0.0010	0.0000	0.0037	0.0027	0.0168	0.0024	0.0027	0.0000	0.0000	0.0000	0.0000	0.0000	0.0000	0.0012	0.0000	0.0000	0.0000	0.0016	0.0000	0.0000	0.0034	0.0010	0.0009	0.0000
OTU_1301	D_Fungi	0.0030	0.0019	0.0000	0.0000	0.0011	0.0029	0.0008	0.0011	0.0020	0.0000	0.0000	0.0000	0.0000	0.0000	0.0045	0.0000	0.0143	0.0020	0.0000	0.0000	0.0000	0.0025	0.0015	0.0000	0.0109	0.0047	0.0017	0.0010	0.0011	0.0039	0.0018	0.0095
OTU_1302	D_Fungi	0.0000	0.0000	0.0000	0.0000	0.0000	0.0000	0.0000	0.0000	0.0010	0.0012	0.0000	0.0013	0.0000	0.0000	0.0027	0.0000	0.0000	0.0000	0.0000	0.0000	0.0000	0.0000	0.0000	0.0000	0.0041	0.0000	0.0000	0.0000	0.0000	0.0030	0.0000	0.0000
OTU_1303	C_Dothideomycetes	0.0000	0.0000	0.0000	0.0000	0.0000	0.0000	0.0000	0.0011	0.0000	0.0000	0.0000	0.0000	0.0000	0.0000	0.0018	0.0010	0.0000	0.0000	0.0000	0.0000	0.0029	0.0000	0.0000	0.0000	0.0000	0.0000	0.0000	0.0000	0.0000	0.0000	0.0000	0.0000
OTU_1304	G_Ramicandelaber	0.0000	0.0000	0.0000	0.0000	0.0000	0.0000	0.0000	0.0000	0.0000	0.0000	0.0000	0.0000	0.0000	0.0000	0.0027	0.0020	0.0000	0.0000	0.0000	0.0000	0.0000	0.0000	0.0000	0.0000	0.0000	0.0000	0.0000	0.0000	0.0000	0.0000	0.0000	0.0000
OTU_1305	D_Fungi	0.0000	0.0000	0.0000	0.0000	0.0000	0.0000	0.0000	0.0022	0.0020	0.0000	0.0000	0.0000	0.0000	0.0024	0.0036	0.0000	0.0033	0.0010	0.0000	0.0000	0.0000	0.0012	0.0000	0.0000	0.0000	0.0000	0.0000	0.0000	0.0000	0.0000	0.0000	0.0000
OTU_1306	O_Xylariales	0.0000	0.0000	0.0000	0.0013	0.0000	0.0000	0.0008	0.0000	0.0000	0.0000	0.0000	0.0000	0.0000	0.0000	0.0018	0.0000	0.0000	0.0000	0.0000	0.0000	0.0000	0.0012	0.0000	0.0015	0.0000	0.0000	0.0000	0.0019	0.0011	0.0000	0.0000	0.0000
OTU_1307	D_Fungi	0.0000	0.0000	0.0012	0.0000	0.0000	0.0000	0.0000	0.0011	0.0000	0.0000	0.0000	0.0000	0.0000	0.0000	0.0018	0.0000	0.0000	0.0000	0.0000	0.0000	0.0000	0.0000	0.0000	0.0000	0.0000	0.0000	0.0000	0.0000	0.0000	0.0000	0.0000	0.0000
OTU_1308	G_Cladosporium	0.0000	0.0000	0.0000	0.0000	0.0000	0.0000	0.0000	0.0000	0.0000	0.0000	0.0000	0.0000	0.0000	0.0000	0.0018	0.0000	0.0000	0.0000	0.0000	0.0000	0.0000	0.0000	0.0000	0.0000	0.0000	0.0000	0.0000	0.0000	0.0000	0.0000	0.0009	0.0000
OTU_1309	P_Ascomycota	0.0000	0.0000	0.0000	0.0000	0.0000	0.0000	0.0000	0.0000	0.0000	0.0000	0.0000	0.0000	0.0000	0.0000	0.0018	0.0000	0.0000	0.0000	0.0000	0.0000	0.0000	0.0000	0.0000	0.0000	0.0000	0.0000	0.0000	0.0000	0.0000	0.0000	0.0000	0.0000
OTU_1310	G_Dioszegia	0.0000	0.0000	0.0000	0.0000	0.0000	0.0000	0.0000	0.0000	0.0000	0.0000	0.0000	0.0000	0.0000	0.0000	0.0018	0.0000	0.0000	0.0000	0.0000	0.0000	0.0000	0.0000	0.0000	0.0000	0.0000	0.0000	0.0000	0.0000	0.0000	0.0000	0.0000	0.0000
OTU_1311	D_Fungi	0.0000	0.0000	0.0000	0.0000	0.0000	0.0000	0.0000	0.0000	0.0000	0.0000	0.0000	0.0000	0.0000	0.0000	0.0018	0.0000	0.0000	0.0000	0.0000	0.0000	0.0000	0.0000	0.0000	0.0000	0.0000	0.0000	0.0000	0.0000	0.0000	0.0000	0.0000	0.0000
OTU_1312	C_Sordariomycetes	0.0000	0.0000	0.0000	0.0013	0.0000	0.0000	0.0000	0.0011	0.0000	0.0000	0.0000	0.0013	0.0000	0.0000	0.0018	0.0010	0.0000	0.0000	0.0000	0.0000	0.0000	0.0000	0.0000	0.0000	0.0000	0.0000	0.0000	0.0000	0.0057	0.0000	0.0018	0.0000
OTU_1313	G_Ramicandelaber	0.0000	0.0000	0.0000	0.0000	0.0000	0.0000	0.0000	0.0000	0.0000	0.0000	0.0037	0.0000	0.0000	0.0012	0.0045	0.0000	0.0000	0.0010	0.0000	0.0000	0.0000	0.0000	0.0000	0.0000	0.0000	0.0000	0.0000	0.0029	0.0011	0.0000	0.0009	0.0000
OTU_1314	D_Fungi	0.0030	0.0000	0.0000	0.0000	0.0000	0.0000	0.0000	0.0000	0.7948	0.0000	0.0009	0.0013	0.0013	0.0024	0.0036	0.0000	0.0000	0.0000	0.0013	0.0000	0.0000	0.0000	0.0000	0.0000	0.0041	0.0016	0.0000	0.0000	0.0000	0.0000	0.0000	0.0000
OTU_1315	G_Daldinia	0.0000	0.0000	0.0000	0.0000	0.0000	0.0000	0.0000	0.0000	0.0000	0.0000	0.0000	0.0000	0.0000	0.0000	0.0027	0.0000	0.0000	0.0000	0.0000	0.0000	0.0000	0.0000	0.0000	0.0000	0.0000	0.0000	0.0000	0.0000	0.0000	0.0000	0.0000	0.0000
OTU_1316	D_Fungi	0.0000	0.0000	0.0000	0.0000	0.0000	0.0000	0.0000	0.0000	0.0000	0.0000	0.0000	0.0000	0.0000	0.0000	0.0072	0.0020	0.0000	0.0000	0.0000	0.0000	0.0000	0.0000	0.0000	0.0000	0.0000	0.0000	0.0000	0.0000	0.0000	0.0000	0.0000	0.0000
OTU_1317	G_Paraphoma	0.0000	0.0000	0.0024	0.0000	0.0000	0.0010	0.0000	0.0000	0.0000	0.0000	0.0000	0.0000	0.0000	0.0024	0.0018	0.0000	0.0000	0.0000	0.0000	0.0000	0.0000	0.0000	0.0000	0.0000	0.0000	0.0000	0.0000	0.0000	0.0000	0.0000	0.0000	0.0000
OTU_1318	D_Fungi	0.0000	0.0000	0.0000	0.0000	0.0000	0.0000	0.0000	0.0000	0.0000	0.0000	0.0000	0.0000	0.0000	0.0000	0.0027	0.0000	0.0000	0.0000	0.0000	0.0000	0.0000	0.0000	0.0000	0.0000	0.0014	0.0016	0.0017	0.0000	0.0045	0.0049	0.0018	0.0019
OTU_1319	G_Clitopilus	0.0000	0.0000	0.0000	0.0000	0.0000	0.0000	0.0000	0.0000	0.0000	0.0000	0.0000	0.0000	0.0052	0.0012	0.0027	0.0000	0.0000	0.0000	0.0000	0.0000	0.0465	0.0000	0.0015	0.0000	0.0054	0.0000	0.0000	0.0000	0.0068	0.0039	0.0072	0.0000
OTU_1320	D_Fungi	0.0000	0.0000	0.0000	0.0000	0.0000	0.0010	0.0008	0.0011	0.0000	0.0000	0.0000	0.0000	0.0000	0.0012	0.0018	0.0000	0.0000	0.0000	0.0067	0.0015	0.0000	0.0000	0.0000	0.0030	0.0000	0.0000	0.0017	0.0010	0.0000	0.0020	0.0000	0.0038
OTU_1321	D_Fungi	0.0000	0.0000	0.0000	0.0000	0.0000	0.0000	0.0000	0.0000	0.0000	0.0000	0.0000	0.0000	0.0000	0.0000	0.0036	0.0000	0.0000	0.0000	0.0000	0.0000	0.0000	0.0000	0.0000	0.0000	0.0000	0.0000	0.0017	0.0000	0.0000	0.0758	0.0000	0.0114
OTU_1322	D_Fungi	0.0000	0.0000	0.0000	0.0013	0.0000	0.0000	0.0008	0.0000	0.0010	0.0025	0.0000	0.0000	0.0000	0.0000	0.0000	0.0000	0.0000	0.0000	0.0000	0.0000	0.0000	0.0000	0.0000	0.0000	0.0000	0.0000	0.0000	0.0000	0.0000	0.0000	0.0000	0.0000
OTU_1323	P_Ascomycota	0.0020	0.0009	0.0012	0.0000	0.0000	0.0000	0.0017	0.0011	0.0000	0.0000	0.0000	0.0013	0.0013	0.0000	0.0009	0.0000	0.0000	0.0010	0.0000	0.0000	0.0015	0.0000	0.0015	0.0015	0.0027	0.0031	0.0000	0.0000	0.0011	0.0000	0.0000	0.0000
OTU_1324	D_Fungi	0.0069	0.0009	0.0012	0.0000	0.0011	0.0000	0.0008	0.0065	0.0060	0.0025	0.0000	0.0013	0.0013	0.0049	0.0000	0.0010	0.0055	0.0010	0.0027	0.0045	0.0015	0.0012	0.0000	0.0060	0.0014	0.0016	0.0000	0.0019	0.0000	0.0030	0.0036	0.0057
OTU_1325	G_Oxyporus	0.0040	0.0000	0.0000	0.0000	0.0000	0.0000	0.0000	0.0011	0.0000	0.0000	0.0000	0.0000	0.0000	0.0000	0.0000	0.0000	0.0000	0.0000	0.0000	0.0000	0.0000	0.0000	0.0000	0.0000	0.0000	0.0000	0.0000	0.0000	0.0000	0.0000	0.0000	0.0000
OTU_1326	P_Basidiomycota	0.0030	0.0000	0.0000	0.0000	0.0000	0.0000	0.0000	0.0000	0.0000	0.0000	0.0000	0.0000	0.0000	0.0000	0.0000	0.0000	0.0011	0.0000	0.0000	0.0000	0.0000	0.0000	0.0000	0.0000	0.0000	0.0000	0.0000	0.0000	0.0000	0.0000	0.0000	0.0000
OTU_1327	D_Fungi	0.0040	0.0000	0.0000	0.0000	0.0000	0.0000	0.0000	0.0043	0.0010	0.0000	0.0000	0.0000	0.0000	0.0000	0.0000	0.0000	0.0000	0.0000	0.0000	0.0000	0.0000	0.0000	0.0000	0.0000	0.0000	0.0000	0.0000	0.0000	0.0000	0.0000	0.0000	0.0000
OTU_1328	D_Fungi	0.0030	0.0000	0.0000	0.0000	0.0000	0.0000	0.0000	0.0000	0.0000	0.0000	0.0000	0.0000	0.0000	0.0000	0.0000	0.0000	0.0011	0.0000	0.0000	0.0000	0.0000	0.0000	0.0000	0.0000	0.0000	0.0000	0.0000	0.0000	0.0000	0.0000	0.0000	0.0000
OTU_1329	D_Fungi	0.0030	0.0000	0.0000	0.0000	0.0000	0.0000	0.0000	0.0000	0.0000	0.0000	0.0000	0.0000	0.0000	0.0000	0.0000	0.0000	0.0000	0.0000	0.0000	0.0000	0.0000	0.0000	0.0000	0.0000	0.0000	0.0000	0.0000	0.0000	0.0000	0.0000	0.0000	0.0000
OTU_1330	D_Fungi	0.0000	0.0000	0.0000	0.0000	0.0011	0.0000	0.0000	0.0000	0.0000	0.0000	0.0000	0.0000	0.0000	0.0012	0.0000	0.0020	0.0022	0.0010	0.0000	0.0000	0.0000	0.0012	0.0015	0.0000	0.0014	0.0000	0.0000	0.0000	0.0000	0.0000	0.0000	0.0000
OTU_1331	C_Sordariomycetes	0.0000	0.0000	0.0000	0.0000	0.0000	0.0000	0.0000	0.0000	0.0000	0.0000	0.0000	0.0000	0.0000	0.0000	0.0000	0.0020	0.0000	0.0000	0.0000	0.0000	0.0000	0.0000	0.0000	0.0000	0.0000	0.0000	0.0000	0.0000	0.0011	0.0000	0.0000	0.0000
OTU_1332	O_Glomerales	0.0000	0.0000	0.0000	0.0000	0.0000	0.0000	0.0000	0.0000	0.0000	0.0000	0.0000	0.0000	0.0000	0.0012	0.0000	0.0020	0.0000	0.0000	0.0000	0.0000	0.0000	0.0000	0.0000	0.0000	0.0000	0.0000	0.0000	0.0000	0.0000	0.0010	0.0000	0.0000
OTU_1333	D_Fungi	0.0010	0.0000	0.0000	0.0000	0.0000	0.0000	0.0000	0.0011	0.0000	0.0000	0.0000	0.0000	0.0000	0.0012	0.0000	0.0020	0.0000	0.0000	0.0000	0.0000	0.0000	0.0000	0.0000	0.0000	0.0000	0.0016	0.0017	0.0000	0.0000	0.0000	0.0000	0.0000
OTU_1334	D_Fungi	0.0040	0.0000	0.0000	0.0000	0.0000	0.0000	0.0000	0.0000	0.0030	0.0000	0.0000	0.0000	0.0000	0.0000	0.0000	0.0010	0.0033	0.0000	0.0000	0.0000	0.0015	0.0000	0.0000	0.0045	0.0027	0.0000	0.0000	0.0000	0.0000	0.0010	0.0000	0.0019
OTU_1335	D_Fungi	0.0050	0.0009	0.0000	0.0000	0.0000	0.0000	0.0000	0.0000	0.0000	0.0000	0.0000	0.0013	0.0000	0.0000	0.0000	0.0000	0.0000	0.0010	0.0000	0.0000	0.0015	0.0000	0.0000	0.0000	0.0041	0.0000	0.0068	0.0000	0.0000	0.0010	0.0000	0.0000
OTU_1336	G_Chloridium	0.0000	0.0000	0.0000	0.0000	0.0000	0.0000	0.0000	0.0000	0.0000	0.0000	0.0000	0.0000	0.0000	0.0000	0.0000	0.0020	0.0022	0.0010	0.0027	0.0000	0.0000	0.0000	0.0000	0.0090	0.0000	0.0000	0.0000	0.0010	0.0000	0.0000	0.0000	0.0000
OTU_1337	D_Fungi	0.0040	0.0000	0.0000	0.0000	0.0000	0.0000	0.0000	0.0000	0.0000	0.0000	0.0000	0.0000	0.0000	0.0000	0.0000	0.0000	0.0000	0.0000	0.0000	0.0000	0.0000	0.0000	0.0000	0.0015	0.0000	0.0000	0.0000	0.0000	0.0000	0.0000	0.0000	0.0000
OTU_1338	D_Fungi	0.0030	0.0000	0.0000	0.0000	0.0000	0.0000	0.0000	0.0000	0.0000	0.0000	0.0000	0.0000	0.0000	0.0000	0.0000	0.0000	0.0000	0.0000	0.0000	0.0000	0.0000	0.0000	0.0000	0.0000	0.0000	0.0000	0.0000	0.0000	0.0000	0.0000	0.0000	0.0000
OTU_1339	D_Fungi	0.0020	0.0000	0.0000	0.0000	0.0000	0.0000	0.0000	0.0000	0.0000	0.0000	0.0000	0.0000	0.0000	0.0000	0.0000	0.0000	0.0000	0.0000	0.0000	0.0000	0.0000	0.0000	0.0000	0.0000	0.0000	0.0000	0.0000	0.0000	0.0000	0.0000	0.0000	0.0000
OTU_1340	G_Paraphoma	0.0030	0.0000	0.0000	0.0000	0.0000	0.0000	0.0000	0.0000	0.0000	0.0000	0.0000	0.0000	0.0000	0.0000	0.0000	0.0000	0.0000	0.0000	0.0000	0.0000	0.0000	0.0000	0.0000	0.0000	0.0000	0.0000	0.0000	0.0000	0.0000	0.0000	0.0000	0.0000
OTU_1341	D_Fungi	0.0040	0.0009	0.0000	0.0000	0.0011	0.0000	0.0008	0.0022	0.0000	0.0000	0.0000	0.0000	0.0000	0.0000	0.0000	0.0010	0.0022	0.0000	0.0000	0.0045	0.0015	0.0000	0.0000	0.0015	0.0014	0.0000	0.0000	0.0010	0.0011	0.0000	0.0018	0.0057
OTU_1342	D_Fungi	0.0030	0.0009	0.0000	0.0013	0.0000	0.0000	0.0008	0.0000	0.0020	0.0000	0.0000	0.0013	0.0013	0.0000	0.0000	0.0010	0.0033	0.0000	0.0013	0.0000	0.0000	0.0000	0.0015	0.0045	0.0068	0.0031	0.0000	0.0010	0.0011	0.0030	0.0000	0.0019
OTU_1343	C_Agaricomycetes	0.0030	0.0000	0.0000	0.0013	0.0000	0.0000	0.0000	0.0000	0.0000	0.0012	0.0037	0.0000	0.0000	0.0000	0.0000	0.0000	0.0000	0.0000	0.0000	0.0000	0.0000	0.0000	0.0000	0.0000	0.0000	0.0000	0.0000	0.0000	0.0000	0.0000	0.0000	0.0000
OTU_1344	D_Fungi	0.0020	0.0000	0.0000	0.0000	0.0000	0.0000	0.0000	0.0011	0.0040	0.0012	0.0000	0.0000	0.0000	0.0012	0.0000	0.0000	0.0022	0.0000	0.0013	0.0015	0.0000	0.0000	0.0000	0.0000	0.0000	0.0000	0.0000	0.0000	0.0000	0.0030	0.0009	0.0057
OTU_1345	D_Fungi	0.0020	0.0009	0.0000	0.0000	0.0000	0.0000	0.0000	0.0011	0.0000	0.0000	0.0000	0.0000	0.0000	0.0000	0.0009	0.0000	0.0000	0.0000	0.0000	0.0000	0.0000	0.0000	0.0000	0.0030	0.0000	0.0000	0.0000	0.0000	0.0000	0.0000	0.0000	0.0000
OTU_1346	D_Fungi	0.0050	0.0000	0.0000	0.0000	0.0011	0.0000	0.0008	0.0000	0.0010	0.0000	0.0000	0.0000	0.0000	0.0000	0.0000	0.0010	0.0055	0.0000	0.0000	0.0000	0.0000	0.0000	0.0000	0.0030	0.0014	0.0016	0.0000	0.0000	0.0000	0.0020	0.0036	0.0019
OTU_1347	D_Fungi	0.0020	0.0000	0.0000	0.0000	0.0000	0.0000	0.0000	0.0000	0.0000	0.0000	0.0000	0.0000	0.0000	0.0000	0.0000	0.0000	0.0000	0.0000	0.0000	0.0000	0.0000	0.0000	0.0000	0.0000	0.0000	0.0000	0.0000	0.0000	0.0000	0.0000	0.0000	0.0000
OTU_1348	D_Fungi	0.0020	0.0000	0.0000	0.0000	0.0000	0.0000	0.0000	0.0000	0.0000	0.0012	0.0000	0.0000	0.0000	0.0000	0.0000	0.0000	0.0000	0.0000	0.0000	0.0000	0.0000	0.0000	0.0000	0.0000	0.0000	0.0000	0.0000	0.0000	0.0011	0.0000	0.0009	0.0000
OTU_1349	D_Fungi	0.0030	0.0000	0.0000	0.0000	0.0000	0.0000	0.0000	0.0000	0.0000	0.0000	0.0000	0.0000	0.0000	0.0000	0.0000	0.0000	0.0000	0.0000	0.0000	0.0000	0.0000	0.0000	0.0000	0.0000	0.0014	0.0000	0.0000	0.0000	0.0000	0.0000	0.0000	0.0000
OTU_1350	D_Fungi	0.0020	0.0000	0.0000	0.0000	0.0000	0.0000	0.0000	0.0000	0.0000	0.0000	0.0000	0.0000	0.0000	0.0000	0.0000	0.0010	0.0011	0.0000	0.0000	0.0000	0.0000	0.0000	0.0000	0.0000	0.0000	0.0000	0.0000	0.0000	0.0000	0.0010	0.0000	0.0000
OTU_1351	D_Fungi	0.0020	0.0019	0.0000	0.0000	0.0000	0.0010	0.0000	0.0011	0.0000	0.0012	0.0000	0.0013	0.0000	0.0000	0.0000	0.0000	0.0044	0.0010	0.0013	0.0030	0.0015	0.0000	0.0000	0.0000	0.0000	0.0000	0.0017	0.0000	0.0000	0.0000	0.0000	0.0000
OTU_1352	G_Trichosporon	0.0020	0.0000	0.0000	0.0000	0.0000	0.0000	0.0000	0.0000	0.0000	0.0000	0.0000	0.0000	0.0000	0.0000	0.0000	0.0000	0.0000	0.0000	0.0000	0.0000	0.0000	0.0000	0.0000	0.0000	0.0014	0.0000	0.0000	0.0000	0.0000	0.0000	0.0000	0.0000
OTU_1353	D_Fungi	0.0000	0.0000	0.0000	0.0000	0.0000	0.0000	0.0008	0.0011	0.0020	0.0000	0.0009	0.0013	0.0013	0.0000	0.0000	0.0020	0.0000	0.0000	0.0000	0.0000	0.0000	0.0000	0.0000	0.0000	0.0000	0.0000	0.0000	0.0000	0.0000	0.0000	0.0000	0.0000
OTU_1354	O_Sordariales	0.0000	0.0000	0.0000	0.0000	0.0000	0.0000	0.0000	0.0000	0.0000	0.0000	0.0000	0.0000	0.0000	0.0000	0.0000	0.0041	0.0000	0.0000	0.0000	0.0000	0.0000	0.0000	0.0000	0.0000	0.0000	0.0000	0.0000	0.0000	0.0000	0.0000	0.0000	0.0000
OTU_1355	D_Fungi	0.0000	0.0000	0.0000	0.0013	0.0022	0.0029	0.0008	0.0054	0.0010	0.0000	0.0000	0.0000	0.0000	0.0000	0.0000	0.0020	0.0044	0.0000	0.0000	0.0000	0.0000	0.0000	0.0015	0.0000	0.0000	0.0000	0.0000	0.0010	0.0000	0.0030	0.0000	0.0038
OTU_1356	G_Chaetosphaeria	0.0010	0.0000	0.0000	0.0000	0.0000	0.0000	0.0000	0.0011	0.0000	0.0000	0.0000	0.0013	0.0000	0.0000	0.0000	0.0031	0.0022	0.0000	0.0067	0.0164	0.0000	0.0000	0.0015	0.1062	0.0000	0.0000	0.0000	0.0000	0.0000	0.0000	0.0000	0.0000
OTU_1357	D_Fungi	0.0010	0.0000	0.0000	0.0013	0.0011	0.0000	0.0000	0.0000	0.0010	0.0000	0.0000	0.0000	0.0013	0.0000	0.0000	0.0020	0.0000	0.0010	0.0000	0.0015	0.0000	0.0000	0.0000	0.0000	0.0027	0.0016	0.0000	0.0010	0.0000	0.0010	0.0000	0.0038
OTU_1358	D_Fungi	0.0000	0.0000	0.0000	0.0000	0.0011	0.0000	0.0000	0.0000	0.0010	0.0000	0.0000	0.0000	0.0000	0.0000	0.0000	0.0020	0.0011	0.0000	0.0000	0.0000	0.0000	0.0000	0.0000	0.0000	0.0000	0.0000	0.0000	0.0000	0.0000	0.0000	0.0000	0.0000
OTU_1359	G_Claroideoglomus	0.0000	0.0000	0.0000	0.0000	0.0078	0.0000	0.0076	0.0000	0.0190	0.0050	0.0037	0.0000	0.0052	0.0012	0.0000	0.0000	0.0000	0.0000	0.0000	0.0000	0.0000	0.0012	0.0000	0.0000	0.0000	0.0000	0.0000	0.0000	0.0057	0.0000	0.0072	0.0000
OTU_1360	G_Thelephora	0.0000	0.0000	0.0000	0.0000	0.0000	0.0000	0.0000	0.0000	0.0000	0.0025	0.0000	0.0000	0.0000	0.0000	0.0018	0.0010	0.0000	0.0010	0.0000	0.0015	0.0000	0.0000	0.0000	0.0000	0.0000	0.0000	0.0000	0.0000	0.0000	0.0000	0.0000	0.0000
OTU_1361	D_Fungi	0.0000	0.0000	0.0012	0.0000	0.0000	0.0000	0.0000	0.0000	0.0000	0.0050	0.0009	0.0013	0.0013	0.0000	0.0000	0.0010	0.0011	0.0030	0.0000	0.0089	0.0087	0.0049	0.0117	0.0120	0.0000	0.0016	0.0000	0.0000	0.0011	0.0010	0.0036	0.0000
OTU_1362	D_Fungi	0.0010	0.0000	0.0000	0.0000	0.0000	0.0000	0.0000	0.0000	0.0010	0.0037	0.0000	0.0000	0.0000	0.0000	0.0000	0.0010	0.0022	0.0000	0.0054	0.0000	0.0000	0.0012	0.0044	0.0000	0.0027	0.0016	0.0017	0.0029	0.0000	0.0010	0.0009	0.0057
OTU_1363	P_Ascomycota	0.0000	0.0000	0.0000	0.0000	0.0000	0.0000	0.0000	0.0000	0.0000	0.0025	0.0000	0.0013	0.0000	0.0012	0.0000	0.0000	0.0000	0.0000	0.0000	0.0000	0.0000	0.0000	0.0015	0.0000	0.0000	0.0000	0.0000	0.0000	0.0000	0.0000	0.0018	0.0000
OTU_1364	D_Fungi	0.0000	0.0000	0.0000	0.0000	0.0000	0.0000	0.0000	0.0000	0.0000	0.0000	0.0000	0.0000	0.0000	0.0000	0.0000	0.0020	0.0000	0.0000	0.0000	0.0000	0.0000	0.0000	0.0000	0.0000	0.0000	0.0000	0.0000	0.0000	0.0000	0.0000	0.0000	0.0000
OTU_1365	D_Fungi	0.0000	0.0009	0.0000	0.0000	0.0022	0.0000	0.0000	0.0000	0.0000	0.0000	0.0000	0.0000	0.0000	0.0000	0.0000	0.0031	0.0033	0.0010	0.0013	0.0030	0.0000	0.0025	0.0029	0.0000	0.0014	0.0000	0.0017	0.0000	0.0045	0.0000	0.0027	0.0019
OTU_1366	D_Fungi	0.0000	0.0000	0.0000	0.0000	0.0000	0.0000	0.0000	0.0000	0.0000	0.0000	0.0000	0.0000	0.0000	0.0000	0.0009	0.0020	0.0000	0.0000	0.0000	0.0000	0.0000	0.0000	0.0000	0.0045	0.0000	0.0000	0.0000	0.0000	0.0000	0.0000	0.0000	0.0019
OTU_1367	D_Fungi	0.0000	0.0000	0.0000	0.0000	0.0000	0.0000	0.0000	0.0011	0.0000	0.0000	0.0000	0.0000	0.0000	0.0000	0.0000	0.0041	0.0033	0.0010	0.0000	0.0000	0.0015	0.0000	0.0000	0.0015	0.0014	0.0000	0.0000	0.0000	0.0000	0.0000	0.0000	0.0038
OTU_1368	D_Fungi	0.0020	0.0000	0.0036	0.0000	0.0000	0.0010	0.0017	0.0011	0.0030	0.0075	0.0037	0.0000	0.0026	0.0024	0.0000	0.0041	0.0011	0.0000	0.0000	0.0060	0.0015	0.0025	0.0015	0.0000	0.0000	0.0000	0.0000	0.0010	0.0034	0.0000	0.0036	0.0038
OTU_1369	D_Fungi	0.0000	0.0000	0.0000	0.0000	0.0000	0.0000	0.0000	0.0000	0.0000	0.0298	0.0000	0.0000	0.0000	0.0000	0.0000	0.0000	0.0000	0.0000	0.0000	0.0000	0.0000	0.0000	0.0000	0.0000	0.0394	0.0016	0.0034	0.0000	0.0000	0.0000	0.0000	0.0000
OTU_1370	D_Fungi	0.0010	0.0000	0.0000	0.0000	0.0000	0.0000	0.0000	0.0000	0.0000	0.0000	0.0000	0.0000	0.0000	0.0000	0.0000	0.0020	0.0000	0.0000	0.0000	0.0000	0.0000	0.0000	0.0000	0.0000	0.0000	0.0000	0.0000	0.0000	0.0000	0.0000	0.0000	0.0000
OTU_1371	D_Fungi	0.0000	0.0000	0.0000	0.0013	0.0011	0.0000	0.0008	0.0000	0.0010	0.0025	0.0009	0.0000	0.0000	0.0000	0.0009	0.0020	0.0011	0.0040	0.0013	0.0000	0.0000	0.0000	0.0029	0.0030	0.0000	0.0016	0.0000	0.0000	0.0023	0.0030	0.0009	0.0038
OTU_1372	D_Fungi	0.0020	0.0028	0.0000	0.0000	0.0000	0.0000	0.0000	0.0011	0.0000	0.0000	0.0000	0.0000	0.0013	0.0012	0.0009	0.0031	0.0022	0.0000	0.0013	0.0000	0.0000	0.0012	0.0044	0.0030	0.0014	0.0000	0.0000	0.0000	0.0000	0.0020	0.0009	0.0038
OTU_1373	D_Fungi	0.0000	0.0000	0.0000	0.0000	0.0000	0.0000	0.0000	0.0000	0.0000	0.0000	0.0000	0.0000	0.0000	0.0000	0.0000	0.0020	0.0000	0.0000	0.0000	0.0000	0.0000	0.0000	0.0000	0.0000	0.0000	0.0000	0.0000	0.0000	0.0000	0.0000	0.0000	0.0000
OTU_1374	O_Hypocreales	0.0010	0.0000	0.0012	0.0000	0.0000	0.0000	0.0000	0.0000	0.0010	0.0012	0.0009	0.0013	0.0000	0.0000	0.0000	0.0020	0.0000	0.0000	0.0000	0.0000	0.0015	0.0000	0.0000	0.0000	0.0000	0.0000	0.0000	0.0000	0.0000	0.0000	0.0000	0.0000
OTU_1375	C_Sordariomycetes	0.0000	0.0000	0.0000	0.0000	0.0000	0.0000	0.0000	0.0000	0.0000	0.0000	0.0000	0.0000	0.0000	0.0000	0.0000	0.0020	0.0000	0.0000	0.0013	0.0000	0.0000	0.0000	0.0029	0.0000	0.0027	0.0031	0.0000	0.0010	0.0000	0.0000	0.0000	0.0000
OTU_1376	D_Fungi	0.0000	0.0000	0.0000	0.0000	0.0000	0.0000	0.0000	0.0000	0.0950	0.0000	0.0000	0.0000	0.0000	0.0012	0.0009	0.0000	0.0000	0.0000	0.0000	0.0000	0.0000	0.0000	0.0000	0.0000	0.0000	0.0000	0.0000	0.0000	0.0011	0.0000	0.0000	0.0000
OTU_1377	D_Fungi	0.0010	0.0000	0.0000	0.0000	0.0000	0.0000	0.0000	0.0000	1.1487	0.0012	0.0009	0.0000	0.0039	0.0000	0.0009	0.0000	0.0000	0.0000	0.0013	0.0000	0.0000	0.0000	0.0000	0.0000	0.0014	0.0063	0.0000	0.0000	0.0000	0.0000	0.0000	0.0000
OTU_1378	O_Pleosporales	0.0000	0.0000	0.0000	0.0000	0.0000	0.0000	0.0000	0.0000	0.0390	0.0000	0.0000	0.0000	0.0000	0.0000	0.0000	0.0000	0.0000	0.0000	0.0000	0.0000	0.0000	0.0209	0.0073	0.0075	0.0014	0.0000	0.0000	0.0000	0.0000	0.0000	0.0000	0.0000
OTU_1379	F_Pyronemataceae	0.0000	0.0000	0.0000	0.0000	0.0000	0.0000	0.0000	0.0000	0.0000	0.0000	0.0000	0.0000	0.0026	0.0000	0.0000	0.0000	0.0000	0.0000	0.0000	0.0000	0.0000	0.0000	0.0000	0.0000	0.0000	0.0031	0.0068	0.0000	0.0000	0.0000	0.0000	0.0000
OTU_1380	D_Fungi	0.0000	0.0000	0.0000	0.0000	0.0000	0.0000	0.0008	0.0000	0.0010	0.0012	0.0000	0.0000	0.0026	0.0000	0.0000	0.0000	0.0000	0.0000	0.0000	0.0000	0.0000	0.0012	0.0000	0.0000	0.0000	0.0000	0.0000	0.0000	0.0000	0.0000	0.0000	0.0000
OTU_1381	D_Fungi	0.0000	0.0000	0.0000	0.0000	0.0000	0.0000	0.0000	0.0000	0.0000	0.0000	0.0000	0.0000	0.0026	0.0000	0.0000	0.0000	0.0000	0.0000	0.0000	0.0000	0.0000	0.0000	0.0000	0.0000	0.0000	0.0000	0.0000	0.0000	0.0011	0.0000	0.1032	0.0095
OTU_1382	D_Fungi	0.0000	0.0000	0.0000	0.0000	0.0000	0.0000	0.0000	0.0000	0.0000	0.0000	0.0000	0.0000	0.0026	0.0012	0.0000	0.0000	0.0000	0.0000	0.0000	0.0015	0.0000	0.0000	0.0000	0.0000	0.0000	0.0000	0.0000	0.0000	0.0000	0.0000	0.0000	0.0000
OTU_1383	D_Fungi	0.0000	0.0000	0.0000	0.0000	0.0011	0.0010	0.0008	0.0000	0.0000	0.0000	0.0000	0.0000	0.0026	0.0000	0.0018	0.0000	0.0000	0.0000	0.0000	0.0000	0.0000	0.0000	0.0000	0.0000	0.0000	0.0000	0.0000	0.0000	0.0000	0.0010	0.0000	0.0000
OTU_1384	G_Glomus	0.0000	0.0000	0.0000	0.0013	0.0000	0.0000	0.0000	0.0000	0.0000	0.0000	0.0000	0.0000	0.0039	0.0000	0.0009	0.0000	0.0000	0.0000	0.0000	0.0000	0.0000	0.0000	0.0000	0.0000	0.0000	0.0000	0.0000	0.0000	0.0000	0.0000	0.0000	0.0000
OTU_1385	G_Ceratobasidium	0.0000	0.0000	0.0000	0.0000	0.0000	0.0000	0.0000	0.0000	0.0000	0.0000	0.0000	0.0000	0.0052	0.0012	0.0000	0.0000	0.0000	0.0000	0.0000	0.0000	0.0015	0.0000	0.0000	0.0000	0.0000	0.0000	0.0000	0.0000	0.0000	0.0000	0.0000	0.0000
OTU_1386	P_Ascomycota	0.0000	0.0000	0.0000	0.0000	0.0000	0.0000	0.0000	0.0000	0.0010	0.0025	0.0000	0.0000	0.0129	0.0000	0.0000	0.0010	0.0000	0.0000	0.0000	0.0000	0.0000	0.0000	0.0000	0.0000	0.0000	0.0000	0.0000	0.0000	0.0000	0.0000	0.0000	0.0000
OTU_1387	D_Fungi	0.0010	0.0000	0.0000	0.0000	0.0000	0.0000	0.0000	0.0000	0.0000	0.0000	0.0000	0.0000	0.0311	0.0000	0.0000	0.0000	0.0000	0.0000	0.0000	0.0000	0.0000	0.0000	0.0000	0.0000	0.0054	0.0000	0.0000	0.0000	0.0045	0.0000	0.0000	0.0000
OTU_1388	G_Basidiobolus	0.0000	0.0000	0.0000	0.0000	0.0000	0.0000	0.0000	0.0000	0.0000	0.0000	0.0000	0.0000	0.0298	0.0000	0.0000	0.0000	0.0000	0.0199	0.0000	0.0000	0.0000	0.0000	0.0000	0.0000	0.0000	0.0000	0.0000	0.0000	0.0000	0.0000	0.0000	0.0057
OTU_1389	D_Fungi	0.0000	0.0000	0.0000	0.0000	0.0000	0.0000	0.0000	0.0000	0.0000	0.0000	0.0000	0.0000	0.0104	0.0000	0.0000	0.0000	0.0000	0.0000	0.0000	0.0000	0.0000	0.0000	0.0000	0.0000	0.0000	0.0000	0.0000	0.0000	0.0000	0.0000	0.0000	0.0000
OTU_1390	G_Entrophospora	0.0000	0.0000	0.0000	0.0000	0.0000	0.0000	0.0000	0.0000	0.0000	0.0000	0.0000	0.0013	0.0168	0.0000	0.0000	0.0000	0.0000	0.0000	0.0000	0.0000	0.0000	0.0000	0.0394	0.0000	0.0000	0.0016	0.0000	0.0000	0.0000	0.0000	0.0000	0.0000
OTU_1391	D_Fungi	0.0000	0.0000	0.0000	0.0000	0.0000	0.0000	0.0000	0.0022	0.0020	0.0000	0.0000	0.0013	0.0026	0.0000	0.0000	0.0020	0.0000	0.0000	0.0000	0.0015	0.0000	0.0000	0.0029	0.0000	0.0014	0.0000	0.0000	0.0000	0.0011	0.0010	0.0000	0.0000
OTU_1392	D_Fungi	0.0000	0.0000	0.0000	0.0000	0.0000	0.0000	0.0000	0.0000	0.0000	0.0000	0.0000	0.0000	0.0026	0.0012	0.0009	0.0020	0.0000	0.0000	0.0000	0.0000	0.0000	0.0012	0.0000	0.0000	0.0041	0.0047	0.0000	0.0000	0.0034	0.0039	0.0009	0.0000
OTU_1393	G_Terfezia	0.0000	0.0000	0.0000	0.0000	0.0000	0.0000	0.0000	0.0000	0.0000	0.0000	0.0000	0.0000	0.0181	0.0000	0.0000	0.0000	0.0000	0.0000	0.0000	0.0000	0.0000	0.0012	0.0000	0.0000	0.0000	0.0000	0.0000	0.0000	0.0000	0.0000	0.0000	0.0000
OTU_1394	D_Fungi	0.0000	0.0000	0.0000	0.0000	0.0000	0.0000	0.0000	0.0000	0.0000	0.0000	0.0000	0.0000	0.0026	0.0012	0.0000	0.0010	0.0033	0.0010	0.0000	0.0000	0.0015	0.0000	0.0000	0.0000	0.0000	0.0000	0.0000	0.0000	0.0011	0.0039	0.0000	0.0000
OTU_1395	G_Cryptococcus	0.0000	0.0000	0.0012	0.0000	0.0000	0.0000	0.0000	0.0000	0.0000	0.0000	0.0019	0.0000	0.0000	0.0000	0.0000	0.0000	0.0000	0.0000	0.0000	0.0000	0.0000	0.0000	0.0000	0.0000	0.0000	0.0000	0.0000	0.0000	0.0000	0.0000	0.0000	0.0000
OTU_1396	C_Chytridiomycetes	0.0000	0.0000	0.0000	0.0000	0.0000	0.0010	0.0000	0.0000	0.0000	0.0012	0.0019	0.0000	0.0000	0.0000	0.0000	0.0000	0.0000	0.0000	0.0000	0.0000	0.0000	0.0000	0.0000	0.0000	0.0000	0.0016	0.0000	0.0000	0.0000	0.0010	0.0000	0.0000
OTU_1397	D_Fungi	0.0000	0.0000	0.0000	0.0000	0.0000	0.0000	0.0000	0.0000	0.0000	0.0000	0.0037	0.0000	0.0000	0.0000	0.0000	0.0000	0.0000	0.0000	0.0067	0.0000	0.0000	0.0012	0.0000	0.0000	0.0041	0.0031	0.0000	0.0000	0.0000	0.0000	0.0000	0.0000
OTU_1398	D_Fungi	0.0000	0.0000	0.0000	0.0013	0.0000	0.0000	0.0000	0.0000	0.0020	0.0000	0.0009	0.1681	0.0013	0.0000	0.0009	0.0010	0.0000	0.0000	0.0000	0.0000	0.0000	0.0000	0.0000	0.0000	0.0000	0.0000	0.0000	0.0000	0.0000	0.0000	0.0000	0.0000
OTU_1399	G_Monosporascus	0.0000	0.0000	0.0000	0.0000	0.0000	0.0000	0.0000	0.0000	0.0010	0.0000	0.0009	0.0538	0.0013	0.0000	0.0000	0.0000	0.0000	0.0020	0.0000	0.0000	0.0000	0.0000	0.0000	0.0000	0.0204	0.2459	0.0034	0.0306	0.0614	1.3611	0.0000	0.0000
OTU_1400	D_Fungi	0.0000	0.0000	0.0000	0.0000	0.0011	0.0000	0.0000	0.0000	0.0000	0.0000	0.0028	0.0000	0.0026	0.0000	0.0000	0.0000	0.0000	0.0000	0.0000	0.0000	0.0000	0.0000	0.0000	0.0000	0.0014	0.0000	0.0000	0.0000	0.0000	0.0039	0.0000	0.0000
OTU_1401	G_Coprinellus	0.0000	0.0000	0.0000	0.0000	0.0000	0.0010	0.0000	0.0000	0.0000	0.0000	0.0037	0.0000	0.0000	0.0000	0.0000	0.0000	0.0000	0.0000	0.0013	0.0000	0.0015	0.0000	0.0000	0.0000	0.0000	0.0000	0.0000	0.0000	0.0000	0.0000	0.0000	0.0000
OTU_1402	D_Fungi	0.0000	0.0000	0.0000	0.0000	0.0000	0.0000	0.0000	0.0000	0.0000	0.0000	0.0028	0.0000	0.0000	0.0000	0.0000	0.0000	0.0000	0.0000	0.0000	0.0000	0.0000	0.0000	0.0000	0.0000	0.0000	0.0000	0.0000	0.0000	0.0000	0.0000	0.0000	0.0000
OTU_1403	P_Ascomycota	0.0000	0.0000	0.0000	0.0000	0.0000	0.0000	0.0000	0.0000	0.0000	0.0000	0.0037	0.0000	0.0000	0.0000	0.0000	0.0000	0.0000	0.0000	0.0000	0.0000	0.0000	0.0000	0.0000	0.0000	0.0000	0.0000	0.0000	0.0000	0.0000	0.0000	0.0000	0.0000
OTU_1404	G_Cladosporium	0.0000	0.0000	0.0000	0.0013	0.0011	0.0000	0.0000	0.0000	0.0000	0.0000	0.0019	0.0013	0.0000	0.0000	0.0000	0.0020	0.0000	0.0000	0.0000	0.0000	0.0000	0.0000	0.0000	0.0000	0.0000	0.0000	0.0000	0.0010	0.0000	0.0010	0.0027	0.0000
OTU_1405	D_Fungi	0.0000	0.0000	0.0000	0.0000	0.0000	0.0000	0.0000	0.0000	0.0000	0.0000	0.0000	0.0000	0.0026	0.0000	0.0000	0.0000	0.0000	0.0000	0.0000	0.0000	0.0000	0.0000	0.0000	0.0000	0.0000	0.0000	0.0000	0.0000	0.0023	0.0000	0.0000	0.0000
OTU_1406	G_Blumeria	0.0020	0.0000	0.0000	0.0000	0.0000	0.0010	0.0000	0.0000	0.0000	0.0000	0.0000	0.0000	0.0026	0.0000	0.0000	0.0000	0.0000	0.0000	0.0000	0.0000	0.0000	0.0000	0.0000	0.0000	0.0014	0.0000	0.0000	0.0000	0.0000	0.0000	0.0000	0.0000
OTU_1407	D_Fungi	0.0000	0.0000	0.0000	0.0000	0.0000	0.0000	0.0000	0.0000	0.0000	0.0012	0.0009	0.0000	0.0026	0.0012	0.0000	0.0000	0.0000	0.0000	0.0000	0.0000	0.0000	0.0000	0.0000	0.0000	0.0014	0.0000	0.0000	0.0000	0.0000	0.0000	0.0000	0.0000
OTU_1408	G_Beauveria	0.0000	0.0000	0.0000	0.0000	0.0000	0.0000	0.0000	0.0000	0.0000	0.0012	0.0000	0.0000	0.0026	0.0000	0.0000	0.0000	0.0000	0.0000	0.0000	0.0000	0.0000	0.0000	0.0000	0.0105	0.0000	0.0016	0.0000	0.0000	0.0000	0.0010	0.0009	0.0000
OTU_1409	D_Fungi	0.0000	0.0000	0.0000	0.0000	0.0000	0.0000	0.0000	0.0000	0.0020	0.0000	0.0000	0.0000	0.0026	0.0000	0.0009	0.0000	0.0000	0.0000	0.0000	0.0000	0.0000	0.0000	0.0000	0.0000	0.0000	0.0000	0.0000	0.0000	0.0000	0.0000	0.0000	0.0000
OTU_1410	D_Fungi	0.0000	0.0000	0.0000	0.0000	0.0000	0.0000	0.0000	0.0000	0.0030	0.0000	0.0000	0.0000	0.0026	0.0000	0.0009	0.0000	0.0000	0.0000	0.0000	0.0000	0.0000	0.0000	0.0000	0.0000	0.0000	0.0000	0.0000	0.0000	0.0000	0.0000	0.0000	0.0000
OTU_1411	D_Fungi	0.0000	0.0000	0.0000	0.0000	0.0000	0.0000	0.0000	0.0000	0.0000	0.0000	0.0000	0.0000	0.0026	0.0000	0.0018	0.0000	0.0000	0.0000	0.0000	0.0000	0.0000	0.0000	0.0000	0.0000	0.0000	0.0000	0.0000	0.0000	0.0011	0.0000	0.0000	0.0000
OTU_1412	C_Sordariomycetes	0.0000	0.0000	0.0000	0.0013	0.0000	0.0000	0.0000	0.0000	0.0000	0.0012	0.0009	0.0013	0.0026	0.0000	0.0000	0.0000	0.0022	0.0000	0.0000	0.0015	0.0000	0.0000	0.0044	0.0105	0.0014	0.0141	0.0187	0.0076	0.0034	0.0039	0.0009	0.0038
OTU_1413	G_Marasmius	0.0000	0.0000	0.0000	0.0000	0.0000	0.0000	0.0000	0.0000	0.0000	0.0000	0.0000	0.0000	0.0026	0.0000	0.0000	0.0000	0.0000	0.0000	0.0000	0.0000	0.0000	0.0000	0.0000	0.0000	0.0000	0.0000	0.0000	0.0000	0.0000	0.0000	0.0000	0.0000
OTU_1414	P_Basidiomycota	0.0000	0.0000	0.0000	0.0000	0.0000	0.0000	0.0000	0.0011	0.0000	0.0000	0.0019	0.0000	0.0000	0.0000	0.0009	0.0000	0.0000	0.0000	0.0000	0.0000	0.0000	0.0000	0.0000	0.0105	0.0000	0.0000	0.0000	0.0000	0.0000	0.0000	0.0009	0.0000
OTU_1415	D_Fungi	0.0000	0.0000	0.0000	0.0051	0.0000	0.0000	0.0000	0.0000	0.0010	0.0000	0.0037	0.0000	0.0000	0.0000	0.0000	0.0000	0.0000	0.0000	0.0000	0.0000	0.0000	0.0000	0.0000	0.0000	0.0000	0.0000	0.0000	0.0000	0.0000	0.0000	0.0000	0.0000
OTU_1416	G_Mortierella	0.0010	0.0131	0.0097	0.0038	0.0122	0.0076	0.0067	0.0086	0.0060	0.0124	0.0056	0.0094	0.0091	0.0098	0.0099	0.0153	0.0033	0.0010	0.0013	0.0000	0.0015	0.0025	0.0044	0.0000	0.0027	0.0031	0.0000	0.0038	0.0057	0.0030	0.0027	0.0038
OTU_1417	G_Bullera	0.0000	0.0000	0.0000	0.0000	0.0000	0.0000	0.0000	0.0000	0.0020	0.0025	0.0000	0.0000	0.0026	0.0000	0.0000	0.0000	0.0000	0.0000	0.0000	0.0000	0.0000	0.0000	0.0000	0.0000	0.0000	0.0000	0.0000	0.0000	0.0000	0.0000	0.0000	0.0000
OTU_1418	C_Sordariomycetes	0.0000	0.0000	0.0012	0.0000	0.0000	0.0000	0.0008	0.0000	0.0000	0.0000	0.0000	0.0000	0.0052	0.0000	0.0000	0.0000	0.0000	0.0000	0.0000	0.0000	0.0000	0.0000	0.0000	0.0000	0.0000	0.0000	0.0000	0.0000	0.0000	0.0000	0.0000	0.0000
OTU_1419	D_Fungi	0.0020	0.0028	0.0000	0.0025	0.0011	0.0000	0.0000	0.0000	0.0040	0.0037	0.0065	0.0000	0.0000	0.0000	0.0000	0.0010	0.0000	0.0020	0.0013	0.0060	0.0000	0.0025	0.0000	0.0000	0.0027	0.0000	0.0000	0.0010	0.0011	0.0020	0.0009	0.0019
OTU_1420	D_Fungi	0.0000	0.0000	0.0000	0.0000	0.0000	0.0000	0.0000	0.0000	0.0000	0.0000	0.0019	0.0000	0.0013	0.0012	0.0000	0.0000	0.0000	0.0000	0.0000	0.0000	0.0000	0.0000	0.0000	0.0000	0.0000	0.0000	0.0000	0.0000	0.0000	0.0000	0.0009	0.0000
OTU_1421	D_Fungi	0.0010	0.0000	0.0000	0.0000	0.0000	0.0000	0.0000	0.0000	0.0000	0.0000	0.0000	0.0000	0.0013	0.0000	0.0000	0.0000	0.0011	0.0000	0.0283	0.0015	0.0015	0.0037	0.0088	0.0120	0.0204	0.0094	0.0000	0.0019	0.0057	0.0030	0.0009	0.0000
OTU_1422	D_Fungi	0.0000	0.0000	0.0000	0.0000	0.0000	0.0000	0.0000	0.0000	0.0000	0.0000	0.0000	0.0000	0.0000	0.0000	0.0000	0.0000	0.0000	0.0030	0.0000	0.0000	0.0000	0.0000	0.0058	0.0000	0.0000	0.0000	0.0000	0.0000	0.0000	0.0000	0.0000	0.0000
OTU_1423	G_Bullera	0.0000	0.0000	0.0000	0.0000	0.0000	0.0000	0.0008	0.0000	0.0010	0.0000	0.0000	0.0013	0.0013	0.0000	0.0009	0.0000	0.0000	0.0000	0.0000	0.0000	0.0015	0.0012	0.0088	0.0030	0.0000	0.0000	0.0000	0.0000	0.0000	0.0000	0.0009	0.0000
OTU_1424	G_Funneliformis	0.0000	0.0000	0.0000	0.0000	0.0000	0.0000	0.0000	0.0011	0.0000	0.0000	0.0000	0.0000	0.0000	0.0000	0.0000	0.0000	0.0000	0.0000	0.0000	0.0000	0.0000	0.0000	0.0102	0.0000	0.0000	0.0000	0.0000	0.0000	0.0000	0.0000	0.0000	0.0000
OTU_1425	D_Fungi	0.0000	0.0000	0.0000	0.0000	0.0000	0.0000	0.0000	0.0000	0.0000	0.0000	0.0000	0.0000	0.0000	0.0000	0.0000	0.0000	0.0000	0.0000	0.0027	0.0223	0.0015	0.0000	0.0073	0.0000	0.0000	0.0000	0.0000	0.0000	0.0000	0.0000	0.0000	0.0000
OTU_1426	C_Sordariomycetes	0.0000	0.0000	0.0000	0.0000	0.0000	0.0000	0.0000	0.0000	0.0000	0.0000	0.0000	0.0000	0.0000	0.0000	0.0000	0.0000	0.0000	0.0000	0.0000	0.0000	0.0000	0.0000	0.0073	0.0000	0.0000	0.0000	0.0000	0.0000	0.0000	0.0000	0.0000	0.0000
OTU_1427	D_Fungi	0.0010	0.0009	0.0000	0.0000	0.0033	0.0010	0.0000	0.0011	0.0010	0.0025	0.0000	0.0000	0.0052	0.0000	0.0009	0.0000	0.0011	0.0010	0.0000	0.0000	0.0015	0.0012	0.0000	0.0015	0.0014	0.0000	0.0017	0.0000	0.0011	0.0010	0.0000	0.0019
OTU_1428	G_Trichosporon	0.0000	0.0000	0.0000	0.0013	0.0022	0.0000	0.0000	0.0000	0.0000	0.0000	0.0000	0.0000	0.0052	0.0000	0.0009	0.0010	0.0000	0.0010	0.0027	0.0000	0.0015	0.0000	0.0000	0.0000	0.0027	0.0000	0.0000	0.0000	0.0000	0.0039	0.0009	0.0000
OTU_1429	D_Fungi	0.0000	0.0000	0.0000	0.0000	0.0000	0.0000	0.0000	0.0000	0.0000	0.0000	0.0000	0.0000	0.0052	0.0000	0.0000	0.0000	0.0000	0.0000	0.0000	0.0000	0.0015	0.0000	0.0000	0.0000	0.0000	0.0000	0.0000	0.0000	0.0000	0.0000	0.0000	0.0000
OTU_1430	C_Chytridiomycetes	0.0000	0.0000	0.0000	0.0000	0.0000	0.0000	0.0000	0.0000	0.0040	0.0000	0.0000	0.0000	0.0026	0.0000	0.0000	0.0000	0.0000	0.0000	0.0000	0.0000	0.0000	0.0000	0.0000	0.0000	0.0000	0.0000	0.0017	0.0000	0.0000	0.0000	0.0000	0.0000
OTU_1431	D_Fungi	0.0000	0.0000	0.0000	0.0000	0.0011	0.0000	0.0000	0.0000	0.0000	0.0000	0.0000	0.0000	0.0026	0.0000	0.0000	0.0000	0.0000	0.0000	0.0000	0.0000	0.0000	0.0000	0.0000	0.0000	0.0000	0.0000	0.0000	0.0000	0.0000	0.0000	0.0000	0.0000
OTU_1432	D_Fungi	0.0000	0.0000	0.0000	0.0000	0.0000	0.0000	0.0000	0.0000	0.0000	0.0000	0.0000	0.0000	0.0026	0.0000	0.0000	0.0000	0.0000	0.0000	0.0000	0.0000	0.0000	0.0000	0.0000	0.0000	0.0000	0.0000	0.0000	0.0000	0.0023	0.0000	0.0000	0.0000
OTU_1433	D_Fungi	0.0000	0.0009	0.0012	0.0000	0.0011	0.0010	0.0000	0.0000	0.0000	0.0000	0.0009	0.0000	0.0026	0.0000	0.0000	0.0000	0.0000	0.0000	0.0000	0.0000	0.0000	0.0000	0.0000	0.0000	0.0000	0.0000	0.0000	0.0000	0.0034	0.0000	0.0000	0.0000
OTU_1434	O_Agaricales	0.0000	0.0000	0.0000	0.0000	0.0000	0.0000	0.0000	0.0000	0.0040	0.0000	0.0000	0.0000	0.0401	0.0037	0.0000	0.0000	0.0000	0.0000	0.0000	0.0000	0.0000	0.0000	0.0000	0.0000	0.0000	0.0000	0.0000	0.0000	0.0011	0.0010	0.0000	0.0000
OTU_1435	D_Fungi	0.0000	0.0000	0.0000	0.0000	0.0000	0.0000	0.0000	0.0000	0.0000	0.0000	0.0000	0.0027	0.0000	0.0000	0.0000	0.0000	0.0000	0.0000	0.0000	0.0000	0.0000	0.0000	0.0000	0.0000	0.0000	0.0000	0.0000	0.0000	0.0000	0.0000	0.0000	0.0000
OTU_1436	D_Fungi	0.0000	0.0000	0.0000	0.0000	0.0000	0.0000	0.0000	0.0000	0.0000	0.0000	0.0000	0.0000	0.0091	0.0000	0.0000	0.0000	0.0000	0.0000	0.0000	0.0000	0.0000	0.0000	0.0000	0.0000	0.0150	0.0000	0.0000	0.0000	0.0750	0.0010	0.0000	0.0000
OTU_1437	D_Fungi	0.0000	0.0000	0.0000	0.0000	0.0011	0.0000	0.0000	0.0022	0.0000	0.0000	0.0000	0.0000	0.0039	0.0000	0.0009	0.0010	0.0000	0.0000	0.0000	0.0000	0.0000	0.0000	0.0000	0.0000	0.0014	0.0000	0.0017	0.0000	0.0000	0.0010	0.0009	0.0000
OTU_1438	G_Conocybe	0.0000	0.0000	0.0012	0.0000	0.0000	0.0000	0.0000	0.0022	0.0010	0.0012	0.0009	0.0000	0.0608	0.0000	0.0000	0.0000	0.0000	0.0000	0.0000	0.0104	0.0000	0.0000	0.0000	0.0015	0.0000	0.0000	0.0000	0.0000	0.0000	0.0000	0.0009	0.0000
OTU_1439	C_Sordariomycetes	0.0000	0.0009	0.0000	0.0000	0.0000	0.0000	0.0000	0.0000	0.0010	0.0000	0.0000	0.0000	0.0621	0.0012	0.0000	0.0000	0.0000	0.0000	0.0000	0.0000	0.0000	0.0000	0.0000	0.0000	0.0000	0.0094	0.0000	0.0000	0.0386	0.0010	0.0036	0.0057
OTU_1440	D_Fungi	0.0000	0.0000	0.0000	0.0000	0.0000	0.0000	0.0000	0.0000	0.0000	0.0000	0.0000	0.0000	0.0569	0.0000	0.0000	0.0000	0.0000	0.0000	0.0000	0.0000	0.0000	0.0000	0.0000	0.0000	0.0122	0.0000	0.0000	0.0010	0.0011	0.0000	0.0000	0.0019
OTU_1441	D_Fungi	0.0000	0.0000	0.0012	0.0000	0.0000	0.0000	0.0000	0.0000	0.0000	0.0000	0.0000	0.0000	0.0065	0.0000	0.0000	0.0000	0.0000	0.0000	0.0000	0.0000	0.0000	0.0000	0.0000	0.0000	0.0000	0.0000	0.0000	0.0000	0.0000	0.0000	0.0009	0.0000
OTU_1442	G_Claroideoglomus	0.0010	0.0000	0.0000	0.0000	0.0089	0.0010	0.0042	0.0000	0.0350	0.0025	0.0009	0.0000	0.0052	0.0024	0.0027	0.0010	0.0000	0.0000	0.0000	0.0000	0.0000	0.0000	0.0000	0.0000	0.0000	0.0000	0.0000	0.0000	0.0136	0.0000	0.0036	0.0000
OTU_1443	D_Fungi	0.0000	0.0000	0.0000	0.0000	0.0000	0.0000	0.0000	0.0000	0.0000	0.0000	0.0000	0.0013	0.0065	0.0000	0.0000	0.0020	0.0000	0.0000	0.0000	0.0000	0.0000	0.0000	0.0000	0.0000	0.0000	0.0000	0.0034	0.0000	0.0000	0.0000	0.0000	0.0000
OTU_1444	C_Agaricomycetes	0.0000	0.0000	0.0000	0.0000	0.0000	0.0000	0.0000	0.0000	0.0000	0.0000	0.0000	0.0000	0.0155	0.0000	0.0000	0.0000	0.0000	0.0000	0.0000	0.0000	0.0000	0.0000	0.0000	0.0000	0.0000	0.0000	0.0000	0.0000	0.0000	0.0000	0.0000	0.0000
OTU_1445	D_Fungi	0.0000	0.0000	0.0000	0.0000	0.0022	0.0000	0.0000	0.0011	0.0010	0.0000	0.0000	0.0000	0.0052	0.0037	0.0009	0.0010	0.0143	0.0020	0.0000	0.0000	0.0044	0.0000	0.0102	0.0075	0.0014	0.0000	0.0000	0.0000	0.0068	0.0010	0.0045	0.0038
OTU_1446	D_Fungi	0.0000	0.0000	0.0000	0.0000	0.0000	0.0010	0.0008	0.0011	0.0000	0.0000	0.0000	0.0000	0.0078	0.0000	0.0018	0.0010	0.0000	0.0000	0.0000	0.0000	0.0000	0.0000	0.0015	0.0000	0.0000	0.0000	0.0000	0.0000	0.0000	0.0000	0.0000	0.0000
OTU_1447	D_Fungi	0.0000	0.0000	0.0000	0.0000	0.0011	0.0000	0.0000	0.0000	0.0000	0.0000	0.0000	0.0000	0.0052	0.0024	0.0000	0.0000	0.0000	0.0000	0.0000	0.0000	0.0000	0.0000	0.0000	0.0000	0.0000	0.0000	0.0000	0.0000	0.0000	0.0000	0.0000	0.0000
OTU_1448	D_Fungi	0.0000	0.0000	0.0000	0.0000	0.0000	0.0000	0.0000	0.0000	0.0000	0.0000	0.0093	0.0000	0.0013	0.0000	0.0000	0.0000	0.0000	0.0000	0.0000	0.0000	0.0000	0.0000	0.0000	0.0000	0.0000	0.0000	0.0000	0.0000	0.0011	0.0000	0.0000	0.0000
OTU_1449	D_Fungi	0.0000	0.0000	0.0000	0.0000	0.0000	0.0000	0.0000	0.0000	0.0000	0.0000	0.0000	0.0000	0.0000	0.0000	0.0000	0.0000	0.0000	0.0000	0.0000	0.0000	0.0000	0.0074	0.0000	0.0000	0.0000	0.0000	0.0000	0.0000	0.0000	0.0000	0.0000	0.0000
OTU_1450	D_Fungi	0.0000	0.0009	0.0000	0.0025	0.0000	0.0000	0.0000	0.0022	0.0010	0.0000	0.0000	0.0013	0.0000	0.0012	0.0000	0.0000	0.0011	0.0000	0.0013	0.0000	0.0015	0.0037	0.0000	0.0000	0.0000	0.0016	0.0000	0.0000	0.0000	0.0000	0.0000	0.0000
OTU_1451	D_Fungi	0.0000	0.0000	0.0000	0.0000	0.0000	0.0000	0.0000	0.0000	0.0000	0.0000	0.0000	0.0000	0.0000	0.0000	0.0000	0.0000	0.0000	0.0000	0.0000	0.0000	0.0000	0.0025	0.0000	0.0000	0.0000	0.0000	0.0000	0.0000	0.0000	0.0000	0.0000	0.0000
OTU_1452	P_Ascomycota	0.0000	0.0000	0.0000	0.0000	0.0011	0.0000	0.0000	0.0000	0.0000	0.0000	0.0000	0.0000	0.0000	0.0012	0.0000	0.0000	0.0066	0.0020	0.0000	0.0000	0.0000	0.0025	0.0000	0.0000	0.0027	0.0000	0.0000	0.0019	0.0000	0.0000	0.0000	0.0000
OTU_1453	P_Chytridiomycota	0.0000	0.0000	0.0000	0.0013	0.0000	0.0000	0.0000	0.0000	0.0000	0.0000	0.0000	0.0000	0.0000	0.0000	0.0000	0.0000	0.0000	0.0000	0.0000	0.0000	0.0029	0.0160	0.0000	0.0000	0.0054	0.0000	0.0017	0.0000	0.0000	0.0000	0.0000	0.0000
OTU_1454	C_Agaricomycetes	0.0000	0.0000	0.0000	0.0000	0.0000	0.0000	0.0000	0.0000	0.0000	0.0000	0.0000	0.0000	0.0000	0.0000	0.0000	0.0000	0.0000	0.0000	0.0000	0.0000	0.0000	0.0160	0.0000	0.0000	0.0000	0.0000	0.0000	0.0000	0.0000	0.0000	0.0000	0.0000
OTU_1455	G_Oculimacula	0.0000	0.0000	0.0000	0.0000	0.0000	0.0000	0.0000	0.0000	0.0000	0.0000	0.0000	0.0000	0.0000	0.0000	0.0000	0.0000	0.0000	0.0020	0.0027	0.0000	0.0029	0.0233	0.0029	0.0015	0.0027	0.0000	0.0000	0.0000	0.0080	0.0000	0.0000	0.1290
OTU_1456	G_Ustilago	0.0000	0.0009	0.0000	0.0000	0.0022	0.0010	0.0000	0.0022	0.0000	0.0025	0.0009	0.0000	0.0000	0.0012	0.0000	0.0000	0.0022	0.0000	0.0013	0.0000	0.0000	0.0025	0.0000	0.0000	0.0000	0.0016	0.0000	0.0000	0.0034	0.0000	0.0036	0.0019
OTU_1457	D_Fungi	0.0000	0.0000	0.0000	0.0000	0.0000	0.0000	0.0000	0.0000	0.0020	0.0000	0.0000	0.0000	0.0000	0.0000	0.0000	0.0000	0.0000	0.0000	0.0000	0.0000	0.0000	0.0000	0.0000	0.0000	0.0000	0.0000	0.0000	0.0000	0.0000	0.0000	0.0000	0.0000
OTU_1458	D_Fungi	0.0010	0.0009	0.0000	0.0000	0.0011	0.0010	0.0008	0.0022	0.0040	0.0000	0.0000	0.0013	0.0000	0.0000	0.0009	0.0000	0.0000	0.0020	0.0013	0.0000	0.0000	0.0000	0.0000	0.0030	0.0054	0.0016	0.0000	0.0000	0.0000	0.0039	0.0036	0.0057
OTU_1459	D_Fungi	0.0000	0.0009	0.0000	0.0000	0.0000	0.0000	0.0000	0.0011	0.0020	0.0000	0.0000	0.0000	0.0000	0.0012	0.0009	0.0010	0.0000	0.0000	0.0000	0.0000	0.0000	0.0000	0.0029	0.0015	0.0000	0.0000	0.0000	0.0000	0.0000	0.0010	0.0009	0.0000
OTU_1460	F_Tremellaceae	0.0000	0.0000	0.0000	0.0000	0.0011	0.0000	0.0008	0.0000	0.0000	0.0000	0.0000	0.0000	0.0000	0.0000	0.0000	0.0010	0.0000	0.0000	0.0000	0.0000	0.0015	0.0049	0.0029	0.0000	0.0041	0.0000	0.0000	0.0000	0.0011	0.0049	0.0000	0.0000
OTU_1461	D_Fungi	0.0030	0.0019	0.0000	0.0000	0.0000	0.0019	0.0017	0.0000	0.0020	0.0037	0.0056	0.0000	0.0000	0.0000	0.0000	0.0000	0.0000	0.0030	0.0000	0.0000	0.0044	0.0037	0.0000	0.0000	0.0014	0.0000	0.0000	0.0000	0.0011	0.0000	0.0009	0.0000
OTU_1462	C_Agaricomycetes	0.0000	0.0000	0.0000	0.0000	0.0000	0.0000	0.0000	0.0000	0.0000	0.0000	0.0000	0.0000	0.0000	0.0000	0.0000	0.0000	0.0000	0.0000	0.0000	0.0000	0.0000	0.0037	0.0000	0.0000	0.0000	0.0000	0.0000	0.0000	0.0000	0.0000	0.0000	0.0000
OTU_1463	C_Chytridiomycetes	0.0000	0.0000	0.0000	0.0000	0.0000	0.0000	0.0000	0.0000	0.0030	0.0012	0.0000	0.0000	0.0000	0.0000	0.0000	0.0000	0.0000	0.0000	0.0000	0.0000	0.0000	0.0000	0.0000	0.0000	0.0041	0.0000	0.0000	0.0000	0.0011	0.0000	0.0000	0.0000
OTU_1464	D_Fungi	0.0000	0.0000	0.0000	0.0000	0.0000	0.0000	0.0000	0.0000	0.0020	0.0000	0.0000	0.0000	0.0000	0.0000	0.0000	0.0000	0.0000	0.0000	0.0000	0.0000	0.0000	0.0012	0.0000	0.0000	0.0000	0.0000	0.0000	0.0000	0.0000	0.0000	0.0000	0.0000
OTU_1465	D_Fungi	0.0000	0.0000	0.0000	0.0000	0.0000	0.0000	0.0000	0.0000	0.0020	0.0000	0.0000	0.0000	0.0000	0.0000	0.0000	0.0000	0.0000	0.0000	0.0000	0.0000	0.0000	0.0000	0.0000	0.0000	0.0000	0.0000	0.0000	0.0000	0.0000	0.0000	0.0000	0.0038
OTU_1466	G_Ramicandelaber	0.0040	0.0009	0.0000	0.0000	0.0011	0.0010	0.0008	0.0000	0.0050	0.0099	0.0000	0.0000	0.0000	0.0012	0.0000	0.0000	0.0000	0.0000	0.0000	0.0000	0.0000	0.0000	0.0000	0.0015	0.0014	0.0000	0.0000	0.0000	0.0000	0.0000	0.0000	0.0000
OTU_1467	D_Fungi	0.0000	0.0028	0.0000	0.0000	0.0000	0.0000	0.0000	0.0000	0.0000	0.0000	0.0000	0.0000	0.0000	0.0000	0.0000	0.0000	0.0011	0.0000	0.0000	0.0000	0.0000	0.0049	0.0000	0.0000	0.0041	0.0016	0.0000	0.0000	0.0000	0.0000	0.0000	0.0000
OTU_1468	D_Fungi	0.0000	0.0000	0.0012	0.0000	0.0000	0.0000	0.0000	0.0000	0.0000	0.0000	0.0009	0.0000	0.0000	0.0000	0.0000	0.0000	0.0000	0.0000	0.0000	0.0000	0.0000	0.0074	0.0000	0.0000	0.0000	0.0000	0.0000	0.0000	0.0000	0.0000	0.0000	0.0000
OTU_1469	D_Fungi	0.0000	0.0000	0.0000	0.0000	0.0000	0.0000	0.0000	0.0000	0.0030	0.0000	0.0000	0.0000	0.0013	0.0000	0.0000	0.0000	0.0000	0.0000	0.0000	0.0000	0.0000	0.0000	0.0000	0.0000	0.0000	0.0000	0.0000	0.0000	0.0000	0.0000	0.0000	0.0000
OTU_1470	D_Fungi	0.0000	0.0000	0.0000	0.0000	0.0000	0.0010	0.0000	0.0000	0.0030	0.0000	0.0000	0.0000	0.0000	0.0000	0.0000	0.0000	0.0000	0.0000	0.0013	0.0000	0.0000	0.0000	0.0000	0.0000	0.0000	0.0000	0.0000	0.0000	0.0000	0.0000	0.0000	0.0000
OTU_1471	D_Fungi	0.0000	0.0000	0.0000	0.0013	0.0000	0.0000	0.0000	0.0000	0.0060	0.0037	0.0000	0.0000	0.0000	0.0012	0.0000	0.0010	0.0011	0.0000	0.0000	0.0000	0.0000	0.0000	0.0029	0.0000	0.0014	0.0000	0.0017	0.0000	0.0000	0.0000	0.0000	0.0000
OTU_1472	G_Scedosporium	0.0010	0.0009	0.0012	0.0000	0.0011	0.0019	0.0000	0.0000	0.0020	0.0000	0.0009	0.0013	0.0013	0.0000	0.0000	0.0000	0.0000	0.0000	0.0000	0.0000	0.0000	0.0000	0.0029	0.0000	0.0000	0.0016	0.0000	0.0038	0.0000	0.0010	0.0018	0.0000
OTU_1473	P_Ascomycota	0.0000	0.0009	0.0000	0.0000	0.0000	0.0010	0.0000	0.0000	0.0090	0.0000	0.0000	0.0000	0.0000	0.0000	0.0000	0.0000	0.0000	0.0000	0.0000	0.0000	0.0000	0.0000	0.0000	0.0000	0.0000	0.0000	0.0000	0.0000	0.0000	0.0020	0.0009	0.0000
OTU_1474	D_Fungi	0.0010	0.0000	0.0000	0.0000	0.0011	0.0000	0.0000	0.0000	0.0060	0.0037	0.0112	0.0000	0.0000	0.0000	0.0000	0.0000	0.0000	0.0000	0.0000	0.0000	0.0000	0.0000	0.0000	0.0000	0.0000	0.0000	0.0000	0.0000	0.0000	0.0000	0.0000	0.0000
OTU_1475	D_Fungi	0.0000	0.0000	0.0000	0.0000	0.0000	0.0000	0.0000	0.0000	0.0080	0.0000	0.0000	0.0000	0.0000	0.0000	0.0000	0.0000	0.0000	0.0000	0.0000	0.0000	0.0000	0.0000	0.0000	0.0000	0.0014	0.0000	0.0000	0.0000	0.0000	0.0000	0.0000	0.0000
OTU_1476	D_Fungi	0.0000	0.0000	0.0024	0.0000	0.0000	0.0000	0.0000	0.0000	0.0120	0.0050	0.0009	0.0081	0.0000	0.0000	0.0027	0.0000	0.0000	0.0000	0.0000	0.0000	0.0000	0.0000	0.0000	0.0000	0.0000	0.0000	0.0000	0.0000	0.0000	0.0049	0.0000	0.0000
OTU_1477	F_Ceratostomataceae	0.0000	0.0000	0.0000	0.0000	0.0000	0.0000	0.0000	0.0000	0.0050	0.0000	0.0000	0.0000	0.0000	0.0000	0.0000	0.0010	0.0000	0.0000	0.0000	0.0000	0.0000	0.0000	0.0000	0.0015	0.0000	0.0000	0.0000	0.0000	0.0000	0.0000	0.0000	0.0000
OTU_1478	G_Glomus	0.0000	0.0000	0.0000	0.0000	0.0000	0.0000	0.0000	0.0000	0.0160	0.0000	0.0000	0.0000	0.0000	0.0000	0.0000	0.0031	0.0000	0.0000	0.0000	0.0000	0.0000	0.0000	0.0000	0.0000	0.0000	0.0000	0.0000	0.0000	0.0000	0.0000	0.0000	0.0019
OTU_1479	G_Tetragoniomyces	0.0000	0.0000	0.0000	0.0000	0.0000	0.0000	0.0000	0.0000	0.0050	0.0000	0.0000	0.0013	0.0000	0.0000	0.0000	0.0000	0.0000	0.0000	0.0000	0.0000	0.0000	0.0000	0.0000	0.0000	0.0000	0.0000	0.0000	0.0000	0.0000	0.0000	0.0000	0.0000
OTU_1480	D_Fungi	0.0000	0.0000	0.0000	0.0000	0.0000	0.0000	0.0000	0.0000	0.0070	0.0000	0.0000	0.0000	0.0000	0.0000	0.0000	0.0000	0.0000	0.0000	0.0000	0.0000	0.0000	0.0012	0.0015	0.0000	0.0000	0.0016	0.0000	0.0010	0.0000	0.0020	0.0000	0.0000
OTU_1481	C_Dothideomycetes	0.0000	0.0000	0.0000	0.0000	0.0000	0.0000	0.0000	0.0000	0.0000	0.0000	0.0000	0.0000	0.0013	0.0000	0.0000	0.0000	0.0000	0.0020	0.0000	0.0000	0.0000	0.1228	0.0015	0.0000	0.0000	0.0000	0.0000	0.0000	0.0000	0.0000	0.0000	0.0000
OTU_1482	D_Fungi	0.0000	0.0000	0.0000	0.0000	0.0011	0.0010	0.0000	0.0000	0.0020	0.0000	0.0009	0.0000	0.0026	0.0000	0.0009	0.0000	0.0000	0.0000	0.0000	0.0000	0.0000	0.0000	0.0000	0.0000	0.0000	0.0000	0.0000	0.0029	0.0000	0.0000	0.0009	0.0000
OTU_1483	D_Fungi	0.0010	0.0000	0.0000	0.0000	0.0000	0.0000	0.0000	0.0000	0.0030	0.0000	0.0019	0.0000	0.0013	0.0000	0.0000	0.0000	0.0088	0.0010	0.0000	0.0015	0.0000	0.0000	0.0000	0.0000	0.0027	0.0000	0.0017	0.0000	0.0000	0.0000	0.0000	0.0019
OTU_1484	P_Ascomycota	0.0000	0.0000	0.0000	0.0000	0.0000	0.0000	0.0000	0.0000	0.0000	0.0000	0.0000	0.0000	0.0000	0.0000	0.0000	0.0000	0.0000	0.0000	0.0000	0.0060	0.0160	0.0381	0.0044	0.0239	0.0000	0.0000	0.0000	0.0000	0.0000	0.0000	0.0000	0.0000
OTU_1485	D_Fungi	0.0000	0.0000	0.0000	0.0000	0.0000	0.0000	0.0000	0.0000	0.0000	0.0000	0.0000	0.0000	0.0000	0.0000	0.0000	0.0000	0.0000	0.0010	0.0000	0.0000	0.0000	0.1277	0.0015	0.0000	0.0000	0.0000	0.0000	0.0000	0.0000	0.0000	0.0000	0.0000
OTU_1486	D_Fungi	0.0000	0.0000	0.0000	0.0000	0.0000	0.0000	0.0000	0.0000	0.0000	0.0000	0.0000	0.0000	0.0000	0.0000	0.0000	0.0000	0.0000	0.0000	0.0000	0.0000	0.0000	0.1596	0.0000	0.0000	0.0000	0.0000	0.0000	0.0000	0.0000	0.0000	0.0000	0.0000
OTU_1487	D_Fungi	0.0000	0.0000	0.0000	0.0000	0.0000	0.0000	0.0000	0.0000	0.0000	0.0000	0.0000	0.0000	0.0000	0.0000	0.0000	0.0000	0.0000	0.0010	0.0000	0.0000	0.0000	0.1142	0.0015	0.0015	0.0000	0.0000	0.0000	0.0000	0.0000	0.0000	0.0000	0.0000
OTU_1488	P_Ascomycota	0.0000	0.0000	0.0012	0.0000	0.0000	0.0000	0.0017	0.0011	0.0000	0.0000	0.0000	0.0000	0.0000	0.0000	0.0009	0.0000	0.0011	0.0000	0.0000	0.0000	0.0189	0.0430	0.0248	0.0030	0.0014	0.0000	0.0017	0.0000	0.0034	0.0000	0.0000	0.0000
OTU_1489	D_Fungi	0.0000	0.0000	0.0000	0.0000	0.0000	0.0000	0.0000	0.0000	0.0000	0.0000	0.0000	0.0000	0.0000	0.0000	0.0000	0.0000	0.0000	0.0000	0.0000	0.0000	0.0000	0.1166	0.0015	0.0015	0.0000	0.0000	0.0000	0.0000	0.0000	0.0000	0.0000	0.0000
OTU_1490	P_Ascomycota	0.0000	0.0000	0.0000	0.0000	0.0000	0.0000	0.0000	0.0000	0.0000	0.0000	0.0000	0.0000	0.0000	0.0000	0.0000	0.0000	0.0000	0.0000	0.0013	0.0000	0.0000	0.3573	0.0000	0.0015	0.0000	0.0000	0.0000	0.0000	0.0000	0.0000	0.0000	0.0000
OTU_1491	D_Fungi	0.0000	0.0000	0.0000	0.0000	0.0000	0.0000	0.0000	0.0000	0.0020	0.0000	0.0000	0.0000	0.0000	0.0000	0.0000	0.0000	0.0000	0.0000	0.0000	0.0000	0.0000	0.0000	0.0000	0.0000	0.0000	0.0000	0.0000	0.0000	0.0000	0.0000	0.0000	0.0000
OTU_1492	F_Hypocreaceae	0.0020	0.0328	0.0000	0.0089	0.0033	0.0057	0.0017	0.0032	0.0000	0.0000	0.0000	0.0067	0.0000	0.0000	0.0000	0.0000	0.0011	0.0010	0.0000	0.0030	0.0029	0.0012	0.0015	0.0553	0.0000	0.0031	0.0017	0.0010	0.0000	0.0030	0.0009	0.0000
OTU_1493	P_Ascomycota	0.0000	0.0000	0.0000	0.0000	0.0000	0.0000	0.0000	0.0000	0.0000	0.0000	0.0000	0.0027	0.0000	0.0000	0.0000	0.0000	0.0000	0.0000	0.0000	0.0000	0.0000	0.0000	0.0000	0.0000	0.0000	0.0000	0.0000	0.0000	0.0000	0.0000	0.0000	0.0000
OTU_1494	G_Kernia	0.0010	0.0019	0.0000	0.0000	0.0011	0.0000	0.0000	0.0000	0.0000	0.0000	0.0000	0.0027	0.0000	0.0000	0.0000	0.0000	0.0000	0.0000	0.0000	0.0030	0.0000	0.0000	0.0000	0.0030	0.0000	0.0016	0.0000	0.0000	0.0000	0.0010	0.0000	0.0000
OTU_1495	D_Fungi	0.0000	0.0000	0.0000	0.0000	0.0000	0.0000	0.0000	0.0000	0.0000	0.0000	0.0000	0.0027	0.0000	0.0000	0.0000	0.0010	0.0000	0.0000	0.0000	0.0000	0.0000	0.0000	0.0000	0.0000	0.0000	0.0000	0.0000	0.0000	0.0000	0.0000	0.0000	0.0000
OTU_1496	P_Glomeromycota	0.0149	0.0000	0.0012	0.0025	0.0278	0.0000	0.0109	0.0086	0.0470	0.1305	0.0606	0.0686	0.0298	0.0647	0.0448	0.1050	0.0000	0.0000	0.0013	0.0000	0.0000	0.0000	0.0044	0.0015	0.0082	0.0000	0.0000	0.0057	0.0114	0.0059	0.0045	0.0057
OTU_1497	D_Fungi	0.0000	0.0000	0.0000	0.0000	0.0000	0.0000	0.0000	0.0000	0.0040	0.0000	0.0000	0.0040	0.0013	0.0012	0.0000	0.0020	0.0000	0.0000	0.0000	0.0000	0.0000	0.0000	0.0000	0.0000	0.0000	0.0016	0.0000	0.0000	0.0000	0.0000	0.0000	0.0019
OTU_1498	D_Fungi	0.0000	0.0000	0.0000	0.0000	0.0000	0.0000	0.0000	0.0000	0.0000	0.0000	0.0000	0.0027	0.0000	0.0000	0.0000	0.0000	0.0000	0.0000	0.0000	0.0000	0.0000	0.0000	0.0000	0.0000	0.0000	0.0000	0.0000	0.0000	0.0000	0.0000	0.0000	0.0000
OTU_1499	D_Fungi	0.0000	0.0000	0.0000	0.0000	0.0000	0.0000	0.0000	0.0000	0.0000	0.0000	0.0000	0.0081	0.0000	0.0012	0.0000	0.0010	0.0000	0.0000	0.0000	0.0000	0.0000	0.0000	0.0000	0.0030	0.0000	0.0000	0.0034	0.0000	0.0000	0.0000	0.0000	0.0000
OTU_1500	O_Helotiales	0.0000	0.0000	0.0000	0.0000	0.0011	0.0000	0.0000	0.0000	0.0010	0.0000	0.0000	0.0040	0.0000	0.0000	0.0000	0.0010	0.0011	0.0000	0.0000	0.0000	0.0000	0.0000	0.0000	0.0000	0.0000	0.0000	0.0017	0.0000	0.0000	0.0010	0.0009	0.0000
OTU_1501	O_Pleosporales	0.0000	0.0000	0.0000	0.0000	0.0000	0.0000	0.0000	0.0000	0.0000	0.0000	0.0000	0.0081	0.0000	0.0000	0.0000	0.0000	0.0000	0.0000	0.0000	0.0000	0.0000	0.0000	0.0000	0.0000	0.0000	0.0000	0.0000	0.0000	0.0000	0.0000	0.0000	0.0000
OTU_1502	P_Basidiomycota	0.0000	0.0000	0.0000	0.0000	0.0000	0.0010	0.0008	0.0000	0.0000	0.0000	0.0009	0.0027	0.0000	0.0000	0.0000	0.0000	0.0022	0.0010	0.0000	0.0000	0.0000	0.0000	0.0000	0.0000	0.0000	0.0000	0.0000	0.0000	0.0000	0.0000	0.0009	0.0000
OTU_1503	G_Exophiala	0.0000	0.0000	0.0000	0.0000	0.0000	0.0000	0.0000	0.0000	0.0000	0.0000	0.0000	0.0040	0.0000	0.0000	0.0009	0.0000	0.0000	0.0000	0.0000	0.0000	0.0000	0.0000	0.0000	0.0000	0.0000	0.0000	0.0000	0.0000	0.0000	0.0000	0.0000	0.0000
OTU_1504	D_Fungi	0.0000	0.0000	0.0000	0.0000	0.0000	0.0000	0.0000	0.0000	0.0010	0.0000	0.0037	0.0000	0.0000	0.0000	0.0000	0.0000	0.0000	0.0000	0.0000	0.0000	0.0000	0.0000	0.0015	0.0000	0.0000	0.0000	0.0000	0.0019	0.0000	0.0000	0.0000	0.0038
OTU_1505	G_Rhizophagus	0.0020	0.0768	0.0000	0.0000	0.0022	0.0029	0.0084	0.0000	0.0000	0.0025	0.0056	0.0013	0.0000	0.0000	0.0009	0.0010	0.0494	0.0000	0.0000	0.0000	0.0000	0.0000	0.0000	0.0000	0.0000	0.0000	0.0000	0.0000	0.0000	0.0010	0.0000	0.0000
OTU_1506	G_Conocybe	0.0000	0.0000	0.0000	0.0000	0.0000	0.0000	0.0008	0.0000	0.0000	0.0000	0.0009	0.0027	0.0000	0.0000	0.0000	0.0000	0.0000	0.0010	0.0000	0.0000	0.0000	0.0000	0.0000	0.0000	0.0014	0.0031	0.0034	0.0000	0.0000	0.0039	0.0000	0.0000
OTU_1507	F_Nectriaceae	0.0000	0.0000	0.0012	0.0000	0.0000	0.0000	0.0000	0.0000	0.0010	0.0000	0.0000	0.0027	0.0000	0.0000	0.0000	0.0010	0.0000	0.0000	0.0000	0.0000	0.0000	0.0000	0.0000	0.0000	0.0027	0.0000	0.0017	0.0000	0.0000	0.0000	0.0000	0.0000
OTU_1508	O_Ustilaginales	0.0000	0.0000	0.0000	0.0000	0.0000	0.0000	0.0000	0.0000	0.0000	0.0000	0.0019	0.0054	0.0013	0.0000	0.0000	0.0000	0.0000	0.0000	0.0000	0.0000	0.0000	0.0000	0.0000	0.0000	0.0000	0.0000	0.0000	0.0000	0.0000	0.0000	0.0000	0.0000
OTU_1509	G_Schizothecium	0.0000	0.0000	0.0000	0.0000	0.0000	0.0000	0.0000	0.0000	0.0000	0.0000	0.0000	0.0027	0.0000	0.0000	0.0000	0.0000	0.0000	0.0000	0.0000	0.0000	0.0000	0.0000	0.0000	0.0000	0.0000	0.0000	0.0000	0.0010	0.0000	0.0000	0.0000	0.0000
OTU_1510	D_Fungi	0.0000	0.0000	0.0000	0.0000	0.0000	0.0000	0.0000	0.0000	0.0000	0.0000	0.0000	0.0027	0.0000	0.0012	0.0000	0.0000	0.0000	0.0000	0.0000	0.0000	0.0000	0.0000	0.0000	0.0000	0.0000	0.0000	0.0000	0.0000	0.0000	0.0000	0.0000	0.0000
OTU_1511	D_Fungi	0.0000	0.0000	0.0000	0.0000	0.0000	0.0000	0.0000	0.0000	0.0000	0.0000	0.0000	0.0027	0.0000	0.0000	0.0000	0.0000	0.0000	0.0000	0.0000	0.0000	0.0000	0.0000	0.0000	0.0000	0.0000	0.0000	0.0000	0.0000	0.0000	0.0000	0.0000	0.0000
OTU_1512	G_Schizothecium	0.0000	0.0000	0.0000	0.0000	0.0000	0.0000	0.0000	0.0000	0.0000	0.0000	0.0000	0.0188	0.0000	0.0000	0.0000	0.0000	0.0000	0.0000	0.0000	0.0000	0.0000	0.0000	0.0000	0.0000	0.0000	0.0000	0.0000	0.0000	0.0000	0.0000	0.0000	0.0000
OTU_1513	D_Fungi	0.0000	0.0000	0.0000	0.0000	0.0000	0.0000	0.0000	0.0000	0.0030	0.0000	0.0000	0.0013	0.0000	0.0000	0.0000	0.0010	0.0000	0.0000	0.0013	0.0015	0.0000	0.0000	0.0000	0.0000	0.0000	0.0000	0.0000	0.0000	0.0000	0.0000	0.0000	0.0000
OTU_1514	C_Chytridiomycetes	0.0000	0.0000	0.0000	0.0000	0.0000	0.0000	0.0000	0.0000	0.0040	0.0000	0.0000	0.0000	0.0000	0.0000	0.0000	0.0000	0.0000	0.0000	0.0000	0.0015	0.0000	0.0000	0.0000	0.0000	0.0000	0.0000	0.0000	0.0000	0.0000	0.0000	0.0000	0.0000
OTU_1515	D_Fungi	0.0000	0.0000	0.0000	0.0000	0.0000	0.0000	0.0000	0.0000	0.0020	0.0000	0.0000	0.0000	0.0000	0.0000	0.0000	0.0000	0.0000	0.0000	0.0000	0.0000	0.0000	0.0000	0.0000	0.0000	0.0000	0.0000	0.0000	0.0000	0.0000	0.0000	0.0000	0.0000
OTU_1516	D_Fungi	0.0000	0.0000	0.0000	0.0000	0.0000	0.0000	0.0000	0.0000	0.0020	0.0000	0.0000	0.0000	0.0000	0.0000	0.0000	0.0020	0.0000	0.0000	0.0000	0.0000	0.0000	0.0000	0.0000	0.0000	0.0000	0.0000	0.0000	0.0000	0.0000	0.0000	0.0000	0.0000
OTU_1517	D_Fungi	0.0000	0.0000	0.0000	0.0000	0.0000	0.0000	0.0000	0.0000	0.0020	0.0000	0.0000	0.0000	0.0000	0.0000	0.0000	0.0000	0.0000	0.0000	0.0000	0.0000	0.0000	0.0000	0.0000	0.0000	0.0000	0.0000	0.0000	0.0000	0.0000	0.0000	0.0000	0.0000
OTU_1518	D_Fungi	0.0000	0.0000	0.0000	0.0000	0.0000	0.0000	0.0000	0.0000	0.0020	0.0000	0.0000	0.0000	0.0000	0.0000	0.0000	0.0000	0.0000	0.0000	0.0000	0.0000	0.0000	0.0000	0.0000	0.0000	0.0000	0.0000	0.0000	0.0000	0.0000	0.0000	0.0000	0.0000
OTU_1519	D_Fungi	0.0000	0.0000	0.0000	0.0000	0.0000	0.0000	0.0000	0.0000	0.0070	0.0025	0.0009	0.0013	0.0000	0.0000	0.0009	0.0000	0.0000	0.0000	0.0000	0.0015	0.0000	0.0000	0.0204	0.0015	0.0000	0.0031	0.0017	0.0000	0.0000	0.0000	0.0000	0.1100
OTU_1520	O_Pleosporales	0.0000	0.0000	0.0000	0.0000	0.0000	0.0010	0.0017	0.0000	0.0020	0.0012	0.0019	0.0013	0.0000	0.0000	0.0000	0.0000	0.0033	0.0000	0.0000	0.0000	0.0015	0.0000	0.0015	0.0015	0.0014	0.0016	0.0000	0.0010	0.0011	0.0000	0.0009	0.0000
OTU_1521	P_Ascomycota	0.0000	0.0000	0.0000	0.0000	0.0000	0.0000	0.0000	0.0000	0.0030	0.0000	0.0000	0.0000	0.0000	0.0000	0.0000	0.0000	0.0000	0.0000	0.0000	0.0000	0.0000	0.0000	0.0000	0.0000	0.0000	0.0000	0.0000	0.0019	0.0000	0.0000	0.0000	0.0000
OTU_1522	D_Fungi	0.0000	0.0009	0.0000	0.0000	0.0000	0.0000	0.0000	0.0000	0.0030	0.0000	0.0000	0.0000	0.0000	0.0000	0.0000	0.0010	0.0000	0.0000	0.0000	0.0000	0.0000	0.0000	0.0000	0.0000	0.0000	0.0000	0.0000	0.0000	0.0000	0.0000	0.0000	0.0000
OTU_1523	D_Fungi	0.0000	0.0000	0.0000	0.0000	0.0000	0.0000	0.0000	0.0011	0.0020	0.0000	0.0000	0.0000	0.0000	0.0000	0.0000	0.0000	0.0000	0.0000	0.0000	0.0000	0.0000	0.0000	0.0000	0.0000	0.0000	0.0000	0.0000	0.0000	0.0000	0.0000	0.0000	0.0000
OTU_1524	D_Fungi	0.0020	0.0009	0.0000	0.0000	0.0000	0.0000	0.0008	0.0000	0.0040	0.0000	0.0000	0.0000	0.0000	0.0000	0.0009	0.0010	0.0022	0.0000	0.0000	0.0015	0.0000	0.0000	0.0000	0.0000	0.0000	0.0000	0.0000	0.0000	0.0000	0.0000	0.0009	0.0000
OTU_1525	F_Orbiliaceae	0.0000	0.0000	0.0000	0.0000	0.0000	0.0000	0.0000	0.0000	0.0000	0.0000	0.0000	0.0054	0.0000	0.0000	0.0000	0.0000	0.0000	0.0000	0.0000	0.0000	0.0000	0.0000	0.0000	0.0000	0.0000	0.0000	0.0000	0.0010	0.0000	0.0000	0.0000	0.0000
OTU_1526	D_Fungi	0.0000	0.0000	0.0000	0.0000	0.0000	0.0000	0.0000	0.0000	0.0010	0.0000	0.0009	0.0027	0.0013	0.0000	0.0000	0.0010	0.0000	0.0000	0.0000	0.0000	0.0015	0.0012	0.0000	0.0000	0.0014	0.0000	0.0000	0.0000	0.0045	0.0020	0.0009	0.0000
OTU_1527	P_Ascomycota	0.0000	0.0009	0.0000	0.1014	0.0000	0.0000	0.0000	0.0000	0.0000	0.0000	0.0000	0.0054	0.0000	0.0000	0.0000	0.0000	0.0000	0.0000	0.0000	0.0015	0.0000	0.0000	0.0000	0.0972	0.0000	0.0000	0.0000	0.0000	0.0000	0.0000	0.0000	0.0000
OTU_1528	D_Fungi	0.0000	0.0000	0.0000	0.0000	0.0000	0.0000	0.0000	0.0000	0.0000	0.0000	0.0000	0.0202	0.0039	0.0000	0.0000	0.0020	0.0000	0.0010	0.2343	0.0328	0.0000	0.0000	0.0583	0.0912	0.0000	0.0000	0.0000	0.0000	0.0000	0.0177	0.0000	0.0095
OTU_1529	D_Fungi	0.0000	0.0000	0.0000	0.0000	0.0000	0.0000	0.0000	0.0000	0.0000	0.0000	0.0000	0.0054	0.0000	0.0000	0.0000	0.0020	0.0000	0.0000	0.0000	0.0000	0.0000	0.0000	0.0000	0.0000	0.0000	0.0000	0.0000	0.0000	0.0000	0.0000	0.0000	0.0000
OTU_1530	G_Sarocladium	0.0000	0.0009	0.0000	0.0013	0.0000	0.0000	0.0000	0.0000	0.0000	0.0000	0.0000	0.0054	0.0000	0.0000	0.0000	0.0000	0.0000	0.0000	0.0000	0.0000	0.0000	0.0000	0.0000	0.0000	0.0000	0.0000	0.0000	0.0000	0.0000	0.0010	0.0000	0.0000
OTU_1531	D_Fungi	0.0010	0.0000	0.0000	0.0000	0.0000	0.0000	0.0000	0.0000	0.0050	0.0000	0.0019	0.0054	0.0013	0.0024	0.0009	0.0020	0.0000	0.0000	0.0054	0.0134	0.0000	0.0000	0.0029	0.0000	0.0000	0.0000	0.0000	0.0010	0.0045	0.0030	0.0009	0.0000
OTU_1532	D_Fungi	0.0000	0.0000	0.0000	0.0000	0.0000	0.0000	0.0000	0.0000	0.0030	0.0000	0.0000	0.0000	0.0000	0.0000	0.0000	0.0000	0.0022	0.0000	0.0000	0.0000	0.0000	0.0000	0.0000	0.0000	0.0000	0.0000	0.0000	0.0000	0.0000	0.0000	0.0000	0.0019
OTU_1533	D_Fungi	0.0000	0.0000	0.0000	0.0000	0.0000	0.0000	0.0000	0.0000	0.0040	0.0000	0.0000	0.0000	0.0000	0.0000	0.0000	0.0000	0.0000	0.0000	0.0000	0.0000	0.0000	0.0000	0.0000	0.0000	0.0000	0.0000	0.0000	0.0000	0.0000	0.0010	0.0000	0.0000
OTU_1534	D_Fungi	0.0050	0.0000	0.0000	0.0000	0.0000	0.0010	0.0008	0.0000	0.0040	0.0000	0.0000	0.0000	0.0000	0.0000	0.0000	0.0000	0.0077	0.0010	0.0000	0.0000	0.0000	0.0000	0.0000	0.0000	0.0014	0.0000	0.0000	0.0000	0.0000	0.0000	0.0009	0.0057
OTU_1535	G_Stagonospora	0.0000	0.0000	0.0000	0.0000	0.0000	0.0000	0.0000	0.0000	0.0030	0.0000	0.0000	0.0013	0.0013	0.0000	0.0000	0.0010	0.0000	0.0000	0.0000	0.0000	0.0000	0.0000	0.0000	0.0000	0.0000	0.0000	0.0000	0.0000	0.0000	0.0000	0.0000	0.0000
OTU_1536	P_Ascomycota	0.0000	0.0000	0.0000	0.0063	0.0000	0.0000	0.0000	0.0000	0.0020	0.0000	0.0009	0.0000	0.0000	0.0000	0.0000	0.0000	0.0000	0.0010	0.0000	0.0000	0.0000	0.0025	0.0015	0.0045	0.0027	0.0000	0.0000	0.0000	0.0023	0.0010	0.0027	0.0095
OTU_1537	D_Fungi	0.0000	0.0000	0.0000	0.0000	0.0000	0.0000	0.0000	0.0022	0.0030	0.0000	0.0009	0.0000	0.0000	0.0000	0.0009	0.0000	0.0000	0.0000	0.0000	0.0000	0.0000	0.0000	0.0000	0.0000	0.0000	0.0000	0.0000	0.0000	0.0000	0.0000	0.0000	0.0000
OTU_1538	G_Trichoderma	0.0000	0.0000	0.0000	0.0000	0.0000	0.0000	0.0000	0.0000	0.0000	0.0000	0.0000	0.0040	0.0000	0.0000	0.0000	0.0000	0.0000	0.0000	0.0000	0.0000	0.0000	0.0000	0.0000	0.0135	0.0000	0.0000	0.0000	0.0000	0.0000	0.0000	0.0000	0.0000
OTU_1539	G_Piptocephalis	0.0010	0.0000	0.0000	0.0000	0.0011	0.0000	0.0000	0.0000	0.0030	0.0000	0.0028	0.0054	0.0026	0.0012	0.0009	0.0020	0.0011	0.0020	0.0054	0.0089	0.0000	0.0000	0.0117	0.0015	0.0054	0.0000	0.0017	0.0019	0.0023	0.0010	0.0036	0.0000
OTU_1540	G_Thyrostroma	0.0000	0.0000	0.0000	0.0000	0.0000	0.0000	0.0000	0.0000	0.0000	0.0000	0.0000	0.0000	0.0000	0.0000	0.0000	0.0000	0.0000	0.0000	0.0000	0.0000	0.0000	0.0000	0.0219	0.0000	0.0000	0.0000	0.0000	0.0000	0.0000	0.0000	0.0000	0.0000
OTU_1541	D_Fungi	0.0010	0.0000	0.0000	0.0013	0.0011	0.0000	0.0017	0.0011	0.0000	0.0000	0.0000	0.0000	0.0000	0.0000	0.0000	0.0000	0.0000	0.0000	0.0000	0.0000	0.0000	0.0025	0.0000	0.0000	0.0000	0.0000	0.0000	0.0010	0.0000	0.0000	0.0009	0.0000
OTU_1542	D_Fungi	0.0000	0.0000	0.0000	0.0000	0.0000	0.0000	0.0000	0.0000	0.0000	0.0000	0.0000	0.0000	0.0000	0.0000	0.0000	0.0000	0.0000	0.0000	0.0000	0.0000	0.0000	0.0037	0.0000	0.0000	0.0000	0.0000	0.0000	0.0000	0.0000	0.0000	0.0000	0.0000
OTU_1543	D_Fungi	0.0000	0.0019	0.0000	0.0000	0.0000	0.0000	0.0000	0.0000	0.0020	0.0000	0.0009	0.0000	0.0013	0.0000	0.0000	0.0000	0.0000	0.0000	0.0000	0.0000	0.0131	0.0049	0.0015	0.0000	0.0027	0.0000	0.0017	0.0000	0.0034	0.0010	0.0036	0.0000
OTU_1544	C_Microbotryomycetes	0.0000	0.0000	0.0000	0.0000	0.0000	0.0000	0.0008	0.0000	0.0000	0.0000	0.0000	0.0013	0.0013	0.0012	0.0018	0.0000	0.0000	0.0000	0.0013	0.0000	0.0029	0.0025	0.0088	0.0015	0.0000	0.0000	0.0000	0.0000	0.0045	0.0069	0.0027	0.0019
OTU_1545	D_Fungi	0.0000	0.0000	0.0000	0.0025	0.0000	0.0010	0.0000	0.0000	0.0010	0.0000	0.0000	0.0000	0.0000	0.0000	0.0000	0.0000	0.0033	0.0030	0.0013	0.0000	0.0073	0.0037	0.0029	0.0000	0.0000	0.0000	0.0000	0.0000	0.0000	0.0020	0.0009	0.0000
OTU_1546	G_Coprinus	0.0000	0.0000	0.0000	0.0000	0.0000	0.0000	0.0000	0.0000	0.0000	0.0000	0.0000	0.0000	0.0000	0.0000	0.0000	0.0000	0.0000	0.0000	0.0000	0.0000	0.0029	0.0025	0.0000	0.0000	0.0000	0.0000	0.0000	0.0000	0.0000	0.0039	0.0000	0.0000
OTU_1547	D_Fungi	0.0000	0.0000	0.0000	0.0000	0.0000	0.0000	0.0008	0.0000	0.0000	0.0000	0.0000	0.0000	0.0000	0.0000	0.0000	0.0000	0.0000	0.0000	0.0000	0.0000	0.0000	0.0025	0.0000	0.0015	0.0000	0.0000	0.0000	0.0000	0.0000	0.0000	0.0000	0.0000
OTU_1548	D_Fungi	0.0000	0.0000	0.0000	0.0000	0.0000	0.0000	0.0000	0.0000	0.0000	0.0012	0.0000	0.0000	0.0000	0.0000	0.0000	0.0000	0.0000	0.0000	0.0000	0.0000	0.0000	0.0037	0.0000	0.0000	0.0000	0.0000	0.0000	0.0000	0.0011	0.0000	0.0000	0.0000
OTU_1549	D_Fungi	0.0000	0.0000	0.0000	0.0000	0.0000	0.0000	0.0000	0.0000	0.0000	0.0000	0.0000	0.0000	0.0000	0.0000	0.0000	0.0010	0.0000	0.0000	0.0848	0.0060	0.0000	0.0000	0.0277	0.0120	0.0014	0.0016	0.0000	0.0000	0.0000	0.0000	0.0000	0.0038
OTU_1550	G_Tetracladium	2.5615	2.3473	2.4847	2.7174	2.9387	1.6205	1.9815	1.1931	1.7836	2.0431	1.3484	1.6739	1.4608	1.8404	1.1813	1.3238	2.3352	5.6949	2.8617	2.0190	1.1252	1.6121	2.6630	1.8125	2.1991	1.9857	0.0051	1.5805	1.4589	2.5528	2.8143	1.7751
OTU_1551	D_Fungi	0.0010	0.0009	0.0073	0.0000	0.0011	0.0010	0.0000	0.0011	0.0000	0.0000	0.0009	0.0000	0.0013	0.0000	0.0009	0.0010	0.0000	0.0010	0.0054	0.0000	0.0015	0.0123	0.0015	0.0015	0.0027	0.0047	0.0034	0.0000	0.0034	0.0010	0.0045	0.0019
OTU_1552	G_Geastrum	0.0000	0.0000	0.0024	0.0000	0.0000	0.0000	0.0000	0.0000	0.0000	0.0000	0.0000	0.0000	0.0000	0.0000	0.0000	0.0000	0.0000	0.0000	0.0000	0.0000	0.0000	0.0000	0.0000	0.0000	0.0000	0.0031	0.0000	0.0000	0.0000	0.0000	0.0000	0.0000
OTU_1553	G_Fusicolla	0.0000	0.0000	0.0024	0.0000	0.0000	0.0000	0.0000	0.0000	0.0000	0.0000	0.0000	0.0000	0.0000	0.0000	0.0000	0.0000	0.0000	0.0000	0.0000	0.0000	0.0000	0.0000	0.0000	0.0000	0.0000	0.0000	0.0000	0.0000	0.0000	0.0000	0.0000	0.0000
OTU_1554	D_Fungi	0.0000	0.0000	0.0036	0.0000	0.0000	0.0000	0.0000	0.0000	0.0000	0.0000	0.0000	0.0000	0.0000	0.0000	0.0000	0.0010	0.0000	0.0000	0.0013	0.0000	0.0000	0.0012	0.0000	0.0000	0.0000	0.0000	0.0000	0.0000	0.0000	0.0000	0.0000	0.0000
OTU_1555	G_Cryptococcus	0.0000	0.0000	0.0036	0.0000	0.0000	0.0000	0.0000	0.0000	0.0000	0.0000	0.0009	0.0000	0.0000	0.0000	0.0000	0.0000	0.0000	0.0000	0.0000	0.0000	0.0000	0.0000	0.0000	0.0000	0.0000	0.0000	0.0000	0.0000	0.0000	0.0000	0.0000	0.0000
OTU_1556	O_Auriculariales	0.0000	0.0000	0.0061	0.0000	0.0000	0.0000	0.0000	0.0000	0.0000	0.0000	0.0000	0.0000	0.0000	0.0000	0.0000	0.0000	0.0000	0.0000	0.0000	0.0000	0.0000	0.0000	0.0000	0.0000	0.0000	0.0000	0.0000	0.0000	0.0000	0.0000	0.0036	0.0000
OTU_1557	F_Trichocomaceae	0.0000	0.0000	0.0000	0.0025	0.0000	0.0000	0.0000	0.0000	0.0000	0.0000	0.0000	0.0013	0.0000	0.0000	0.0000	0.0000	0.0000	0.0000	0.0000	0.0000	0.0000	0.0000	0.0000	0.0060	0.0000	0.0000	0.0000	0.0000	0.0000	0.0000	0.0000	0.0000
OTU_1558	P_Ascomycota	0.0000	0.0000	0.0000	0.0025	0.0000	0.0000	0.0000	0.0000	0.0000	0.0000	0.0009	0.0000	0.0000	0.0000	0.0000	0.0000	0.0000	0.0000	0.0000	0.0000	0.0015	0.0000	0.0000	0.0000	0.0000	0.0000	0.0017	0.0000	0.0000	0.0000	0.0000	0.0000
OTU_1559	D_Fungi	0.0010	0.0000	0.0000	0.0025	0.0000	0.0000	0.0000	0.0000	0.0000	0.0000	0.0000	0.0000	0.0000	0.0000	0.0000	0.0000	0.0000	0.0000	0.0000	0.0000	0.0000	0.0000	0.0000	0.0000	0.0000	0.0000	0.0000	0.0000	0.0000	0.0000	0.0000	0.0000
OTU_1560	F_Hypocreaceae	0.0000	0.0019	0.0000	0.0000	0.0000	0.0000	0.0000	0.0000	0.0000	0.0000	0.0000	0.0013	0.0000	0.0000	0.0009	0.0000	0.0000	0.0000	0.0000	0.0000	0.0000	0.0000	0.0000	0.0000	0.0000	0.0000	0.0017	0.0000	0.0000	0.0000	0.0000	0.0000
OTU_1561	G_Mortierella	0.0010	0.0028	0.0000	0.0013	0.0000	0.0000	0.0008	0.0011	0.0030	0.0000	0.0000	0.0000	0.0000	0.0000	0.0000	0.0000	0.0000	0.0020	0.0000	0.0000	0.0000	0.0000	0.0000	0.0000	0.0014	0.0016	0.0000	0.0000	0.0057	0.0010	0.0000	0.0000
OTU_1562	G_Hannaella	0.0000	0.0000	0.0000	0.0025	0.0011	0.0000	0.0000	0.0000	0.0000	0.0025	0.0009	0.0013	0.0000	0.0000	0.0009	0.0000	0.0000	0.0000	0.0000	0.0000	0.0000	0.0000	0.0000	0.0000	0.0000	0.0000	0.0000	0.0000	0.0000	0.0000	0.0000	0.0000
OTU_1563	F_Agaricaceae	0.0000	0.0000	0.0000	0.0025	0.0000	0.0000	0.0000	0.0000	0.0000	0.0000	0.0000	0.0000	0.0000	0.0000	0.0000	0.0000	0.0000	0.0000	0.0000	0.0000	0.0000	0.0000	0.0000	0.0000	0.0000	0.0000	0.0000	0.0000	0.0000	0.0000	0.0000	0.0000
OTU_1564	D_Fungi	0.0010	0.0000	0.0000	0.0089	0.0000	0.0000	0.0000	0.0011	0.0010	0.0000	0.0000	0.0000	0.0013	0.0000	0.0000	0.0000	0.0000	0.0000	0.0000	0.0015	0.0000	0.0000	0.0000	0.0000	0.0082	0.0000	0.0000	0.0000	0.0000	0.0000	0.0000	0.0000
OTU_1565	F_Orbiliaceae	0.0000	0.0000	0.0000	0.0051	0.0000	0.0000	0.0000	0.0000	0.0000	0.0000	0.0000	0.0000	0.0000	0.0000	0.0000	0.0000	0.0000	0.0000	0.0000	0.0000	0.0000	0.0000	0.0000	0.0000	0.0000	0.0000	0.0000	0.0000	0.0000	0.0000	0.0000	0.0000
OTU_1566	D_Fungi	0.0000	0.0000	0.0000	0.0025	0.0000	0.0000	0.0000	0.0000	0.0000	0.0000	0.0000	0.0000	0.0000	0.0000	0.0000	0.0000	0.0000	0.0000	0.0000	0.0000	0.0000	0.0000	0.0000	0.0000	0.0000	0.0000	0.0000	0.0000	0.0000	0.0000	0.0000	0.0000
OTU_1567	D_Fungi	0.0000	0.0000	0.0000	0.0025	0.0011	0.0019	0.0008	0.0011	0.0000	0.0012	0.0000	0.0013	0.0000	0.0000	0.0000	0.0000	0.0022	0.0010	0.0000	0.0000	0.0000	0.0000	0.0000	0.0000	0.0000	0.0000	0.0000	0.0000	0.0000	0.0000	0.0000	0.0000
OTU_1568	G_Waitea	0.1269	0.0009	0.0194	0.4461	0.0067	0.0038	0.0084	0.4807	0.0000	0.0025	0.0000	0.0471	0.0052	0.0683	0.0188	0.0010	0.0011	0.0040	0.0027	1.8493	1.7183	0.4789	0.0088	0.0030	0.0313	0.3445	0.0254	0.0029	0.2977	0.0118	0.0009	0.0038
OTU_1569	D_Fungi	0.0000	0.0000	0.0024	0.0000	0.0000	0.0000	0.0000	0.0000	0.0020	0.0000	0.0009	0.0000	0.0000	0.0000	0.0000	0.0000	0.0000	0.0000	0.0000	0.0000	0.0000	0.0000	0.0000	0.0000	0.0000	0.0000	0.0000	0.0000	0.0000	0.0000	0.0000	0.0000
OTU_1570	G_Microbotryum	0.0000	0.0000	0.0024	0.0000	0.0000	0.0000	0.0000	0.0000	0.0000	0.0000	0.0000	0.0000	0.0000	0.0000	0.0000	0.0000	0.0000	0.0000	0.0000	0.0000	0.0000	0.0000	0.0000	0.0000	0.0000	0.0000	0.0000	0.0000	0.0000	0.0000	0.0000	0.0000
OTU_1571	P_Ascomycota	0.0000	0.0000	0.0073	0.0000	0.0000	0.0000	0.0000	0.0000	0.0000	0.0000	0.0000	0.0000	0.0000	0.0000	0.0000	0.0000	0.0000	0.0000	0.0000	0.0000	0.0000	0.0000	0.0000	0.0000	0.0000	0.0000	0.0000	0.0000	0.0000	0.0000	0.0000	0.0000
OTU_1572	D_Fungi	0.0000	0.0000	0.0000	0.0000	0.0000	0.0000	0.0000	0.0000	0.0000	0.0000	0.0000	0.0000	0.0000	0.0000	0.0000	0.0000	0.0000	0.0000	0.0000	0.0000	0.0000	0.0000	0.0044	0.0000	0.0014	0.0000	0.0000	0.0000	0.0000	0.0000	0.0000	0.0000
OTU_1573	P_Ascomycota	0.0000	0.0000	0.0000	0.0000	0.0000	0.0000	0.0000	0.0000	0.0000	0.0000	0.0000	0.0000	0.0000	0.0000	0.0000	0.0000	0.0000	0.0000	0.0040	0.0015	0.0000	0.0000	0.0029	0.0015	0.0014	0.0000	0.0000	0.0000	0.0000	0.0000	0.0000	0.0000
OTU_1574	G_Sporidiobolus	0.0000	0.0000	0.0012	0.0000	0.0000	0.0000	0.0000	0.0000	0.0000	0.0000	0.0009	0.0013	0.0013	0.0000	0.0000	0.0000	0.0000	0.0000	0.0000	0.0000	0.0000	0.0000	0.0029	0.0000	0.0000	0.0000	0.0000	0.0000	0.0000	0.0000	0.0000	0.0000
OTU_1575	G_Entyloma	0.0000	0.0000	0.0000	0.0000	0.0011	0.0000	0.0000	0.0000	0.0000	0.0000	0.0000	0.0000	0.0000	0.0000	0.0000	0.0000	0.0011	0.0000	0.0000	0.0000	0.0058	0.0037	0.0044	0.0015	0.0000	0.0000	0.0000	0.0000	0.0000	0.0000	0.0009	0.0000
OTU_1576	G_Psathyrella	0.0000	0.0000	0.0000	0.0000	0.0000	0.0000	0.0000	0.0000	0.0000	0.0000	0.0000	0.0000	0.0000	0.0000	0.0000	0.0000	0.0000	0.0000	0.0000	0.0000	0.0015	0.0012	0.0029	0.0000	0.0000	0.0000	0.0000	0.0000	0.0000	0.0000	0.0009	0.0000
OTU_1577	C_Sordariomycetes	0.0000	0.0000	0.0000	0.0000	0.0000	0.0010	0.0000	0.0000	0.0000	0.0000	0.0000	0.0000	0.0000	0.0000	0.0000	0.0000	0.0011	0.0000	0.0000	0.0000	0.0000	0.0000	0.0029	0.0015	0.0014	0.0047	0.0000	0.0000	0.0000	0.0000	0.0000	0.0000
OTU_1578	D_Fungi	0.0000	0.0000	0.0000	0.0000	0.0000	0.0000	0.0008	0.0000	0.0000	0.0000	0.0000	0.0000	0.0000	0.0000	0.0000	0.0000	0.0000	0.0000	0.0000	0.0000	0.0000	0.0012	0.0029	0.0000	0.0000	0.0000	0.0000	0.0000	0.0000	0.0000	0.0000	0.0000
OTU_1579	D_Fungi	0.0000	0.0000	0.0000	0.0013	0.0022	0.0000	0.0017	0.0043	0.0000	0.0012	0.0009	0.0000	0.0000	0.0012	0.0009	0.0000	0.0055	0.0000	0.0000	0.0000	0.0015	0.0025	0.0058	0.0000	0.0014	0.0000	0.0000	0.0019	0.0023	0.0000	0.0000	0.0019
OTU_1580	D_Fungi	0.0000	0.0000	0.0000	0.0000	0.0011	0.0000	0.0000	0.0000	0.0040	0.0000	0.0009	0.0067	0.0000	0.0000	0.0018	0.0000	0.0033	0.0050	0.0189	0.0045	0.0000	0.0086	0.0292	0.0165	0.0027	0.0016	0.0102	0.0993	0.0000	0.0020	0.0027	0.0000
OTU_1581	D_Fungi	0.0000	0.0000	0.0000	0.0000	0.0000	0.0000	0.0000	0.0000	0.0000	0.0000	0.0000	0.0000	0.0000	0.0000	0.0000	0.0000	0.0000	0.0000	0.0000	0.0000	0.0000	0.0000	0.0029	0.0000	0.0000	0.0000	0.0000	0.0000	0.0000	0.0000	0.0000	0.0000
OTU_1582	P_Ascomycota	0.0000	0.0000	0.0000	0.0000	0.0000	0.0000	0.0000	0.0000	0.0000	0.0000	0.0000	0.0000	0.0000	0.0000	0.0000	0.0000	0.0000	0.0000	0.0175	0.0015	0.0000	0.0012	0.0058	0.0105	0.0041	0.0031	0.0000	0.0000	0.0000	0.0000	0.0009	0.0000
OTU_1583	D_Fungi	0.0000	0.0000	0.0000	0.0000	0.0000	0.0010	0.0000	0.0000	0.0000	0.0000	0.0000	0.0000	0.0000	0.0012	0.0000	0.0000	0.0000	0.0000	0.0000	0.0000	0.0000	0.0025	0.0000	0.0000	0.0000	0.0000	0.0000	0.0000	0.0000	0.0000	0.0000	0.0000
OTU_1584	D_Fungi	0.0000	0.0000	0.0000	0.0000	0.0000	0.0000	0.0000	0.0000	0.0000	0.0000	0.0000	0.0000	0.0000	0.0000	0.0000	0.0000	0.0000	0.0000	0.0000	0.0000	0.0000	0.0025	0.0000	0.0000	0.0000	0.0000	0.0000	0.0000	0.0000	0.0000	0.0000	0.0000
OTU_1585	P_Ascomycota	0.0000	0.0000	0.0000	0.0000	0.0000	0.0000	0.0000	0.0000	0.0000	0.0000	0.0000	0.0000	0.0000	0.0000	0.0000	0.0000	0.0000	0.0000	0.0000	0.0045	0.0000	0.0000	0.0044	0.0045	0.0000	0.0000	0.0000	0.0000	0.0000	0.0020	0.0000	0.0000
OTU_1586	D_Fungi	0.0000	0.0000	0.0000	0.0000	0.0000	0.0000	0.0000	0.0000	0.0000	0.0000	0.0000	0.0000	0.0000	0.0000	0.0000	0.0000	0.0000	0.0000	0.0027	0.0000	0.0000	0.0000	0.0073	0.0000	0.0000	0.0000	0.0000	0.0000	0.0000	0.0000	0.0000	0.0000
OTU_1587	P_Basidiomycota	0.0000	0.0000	0.0000	0.0000	0.0000	0.0000	0.0000	0.0000	0.0000	0.0000	0.0000	0.0000	0.0000	0.0000	0.0000	0.0000	0.0000	0.0000	0.0000	0.0000	0.0000	0.0000	0.0044	0.0000	0.0000	0.0000	0.0000	0.0000	0.0000	0.0000	0.0000	0.0000
OTU_1588	D_Fungi	0.0000	0.0000	0.0000	0.0000	0.0000	0.0000	0.0000	0.0000	0.0000	0.0000	0.0000	0.0000	0.0000	0.0000	0.0000	0.0000	0.0000	0.0000	0.0000	0.0000	0.0000	0.0000	0.0058	0.0030	0.0000	0.0000	0.0000	0.0000	0.0000	0.0000	0.0000	0.0000
OTU_1589	D_Fungi	0.0000	0.0000	0.0000	0.0000	0.0000	0.0000	0.0000	0.0000	0.0000	0.0000	0.0000	0.0000	0.0013	0.0000	0.0009	0.0031	0.0000	0.0000	0.0013	0.0000	0.0000	0.0000	0.0058	0.0000	0.0000	0.0000	0.0000	0.0000	0.0000	0.0108	0.0000	0.0000
OTU_1590	D_Fungi	0.0000	0.0000	0.0000	0.0000	0.0000	0.0000	0.0000	0.0000	0.0000	0.0000	0.0000	0.0000	0.0000	0.0000	0.0000	0.0000	0.0000	0.0000	0.0000	0.0000	0.0000	0.0000	0.3675	0.0000	0.0068	0.0125	0.0017	0.0010	0.0000	0.0000	0.0000	0.0000
OTU_1591	D_Fungi	0.0000	0.0000	0.0000	0.0000	0.0000	0.0000	0.0000	0.0000	0.0000	0.0000	0.0000	0.0000	0.0000	0.0000	0.0000	0.0000	0.0000	0.0000	0.0027	0.0000	0.0000	0.0000	0.0058	0.0030	0.0000	0.0000	0.0000	0.0000	0.0000	0.0000	0.0000	0.0000
OTU_1592	D_Fungi	0.0010	0.0000	0.0000	0.0000	0.0000	0.0000	0.0000	0.0000	0.0000	0.0000	0.0000	0.0000	0.0000	0.0000	0.0000	0.0000	0.0000	0.0000	0.0000	0.0000	0.0000	0.0000	0.0029	0.0000	0.0000	0.0000	0.0000	0.0000	0.0000	0.0000	0.0000	0.0000
OTU_1593	D_Fungi	0.0000	0.0000	0.0000	0.0000	0.0000	0.0000	0.0000	0.0000	0.0000	0.0000	0.0000	0.0013	0.0013	0.0000	0.0000	0.0000	0.0000	0.0050	0.0027	0.0015	0.0000	0.0000	0.0029	0.0075	0.0054	0.0031	0.0000	0.0000	0.0000	0.0000	0.0000	0.0000
OTU_1594	D_Fungi	0.0000	0.0000	0.0000	0.0000	0.0000	0.0000	0.0000	0.0000	0.0000	0.0000	0.0000	0.0000	0.0000	0.0000	0.0000	0.0000	0.0000	0.0000	0.0000	0.0000	0.0000	0.0000	0.0044	0.0015	0.0000	0.0000	0.0000	0.0000	0.0000	0.0000	0.0000	0.0000
OTU_1595	D_Fungi	0.0000	0.0000	0.0000	0.0000	0.0000	0.0000	0.0000	0.0000	0.0000	0.0000	0.0000	0.0000	0.0000	0.0000	0.0000	0.0000	0.0000	0.0000	0.0000	0.0000	0.0000	0.0000	0.0058	0.0000	0.0000	0.0000	0.0000	0.0000	0.0000	0.0000	0.0000	0.0000
OTU_1596	D_Fungi	0.0000	0.0000	0.0000	0.0000	0.0000	0.0000	0.0000	0.0000	0.0010	0.0000	0.0000	0.0000	0.0000	0.0000	0.0000	0.0000	0.0000	0.0000	0.0013	0.0000	0.0000	0.0000	0.0044	0.0015	0.0000	0.0000	0.0000	0.0000	0.0000	0.0000	0.0000	0.0000
OTU_1597	G_Psathyrella	0.0000	0.0000	0.0000	0.0000	0.0000	0.0000	0.0000	0.0000	0.0000	0.0000	0.0000	0.0000	0.0000	0.0000	0.0009	0.0000	0.0000	0.0000	0.0013	0.0000	0.0000	0.0025	0.0000	0.1421	0.0000	0.0000	0.0000	0.0000	0.0000	0.0000	0.0000	0.0000
OTU_1598	P_Ascomycota	0.0000	0.0000	0.0000	0.0000	0.0000	0.0000	0.0000	0.0000	0.0010	0.0000	0.0000	0.0000	0.0000	0.0000	0.0000	0.0000	0.0000	0.0010	0.0013	0.0000	0.0000	0.0000	0.0000	0.0494	0.0000	0.0000	0.0000	0.0000	0.0023	0.0010	0.0000	0.0019
OTU_1599	D_Fungi	0.0010	0.0009	0.0000	0.0000	0.0000	0.0000	0.0008	0.0000	0.0020	0.0000	0.0009	0.0000	0.0000	0.0000	0.0000	0.0000	0.0011	0.0010	0.0013	0.0015	0.0000	0.0025	0.0044	0.0060	0.0027	0.0000	0.0000	0.0000	0.0023	0.0020	0.0009	0.0019
OTU_1600	D_Fungi	0.0000	0.0000	0.0000	0.0000	0.0000	0.0000	0.0000	0.0000	0.0010	0.0000	0.0000	0.0000	0.0000	0.0000	0.0000	0.0010	0.0000	0.0000	0.0135	0.0015	0.0015	0.0000	0.0029	0.0015	0.0000	0.0000	0.0000	0.0019	0.0000	0.0000	0.0000	0.0000
OTU_1601	D_Fungi	0.0000	0.0000	0.0000	0.0000	0.0000	0.0000	0.0000	0.0000	0.0000	0.0000	0.0000	0.0000	0.0000	0.0000	0.0000	0.0000	0.0000	0.0000	0.0013	0.0000	0.0000	0.0000	0.0029	0.0030	0.0014	0.0000	0.0000	0.0000	0.0011	0.0000	0.0000	0.0019
OTU_1602	G_Typhula	0.0000	0.0000	0.0000	0.0000	0.0000	0.0000	0.0000	0.0000	0.0000	0.0000	0.0000	0.0000	0.0000	0.0000	0.0009	0.0000	0.0000	0.0000	0.4027	0.0119	0.0000	0.0025	0.0029	0.0000	0.0000	0.0000	0.0000	0.0000	0.0000	0.0000	0.0000	0.0000
OTU_1603	G_Kochiomyces	0.0000	0.0000	0.0000	0.0000	0.0000	0.0000	0.0000	0.0000	0.0000	0.0000	0.0000	0.0000	0.0000	0.0012	0.0000	0.0000	0.0000	0.0000	0.0000	0.0000	0.0000	0.0000	0.0073	0.0015	0.0000	0.0000	0.0000	0.0000	0.0000	0.0000	0.0000	0.0000
OTU_1604	G_Calcarisporium	0.0000	0.0000	0.0000	0.0000	0.0000	0.0000	0.0000	0.0000	0.0000	0.0000	0.0000	0.0000	0.0000	0.0000	0.0000	0.0000	0.0000	0.0000	0.0000	0.0000	0.0000	0.0012	0.0029	0.0015	0.0000	0.0000	0.0000	0.0000	0.0000	0.0000	0.0000	0.0000
OTU_1605	O_Helotiales	0.0000	0.0000	0.0000	0.0000	0.0000	0.0000	0.0000	0.0000	0.0000	0.0000	0.0000	0.0000	0.0000	0.0000	0.0000	0.0000	0.0000	0.0000	0.0000	0.0000	0.0000	0.0000	0.0029	0.0000	0.0000	0.0000	0.0000	0.0000	0.0000	0.0000	0.0000	0.0000
OTU_1606	D_Fungi	0.0000	0.0000	0.0000	0.0000	0.0000	0.0000	0.0000	0.0000	0.0000	0.0000	0.0000	0.0027	0.0000	0.0000	0.0000	0.0000	0.0000	0.0000	0.0013	0.0015	0.0000	0.0000	0.0058	0.0030	0.0000	0.0000	0.0000	0.0000	0.0000	0.0000	0.0000	0.0000
OTU_1607	G_Leratiomyces	0.0000	0.0000	0.0000	0.0000	0.0000	0.0000	0.0000	0.0000	0.0010	0.0000	0.0000	0.0000	0.0000	0.0000	0.0000	0.0000	0.0000	0.0249	0.0013	0.0000	0.0000	0.0000	0.0000	0.0000	0.0000	0.0000	0.0000	0.0000	0.0000	0.0000	0.0009	0.0000
OTU_1608	D_Fungi	0.0020	0.0000	0.0000	0.0000	0.0022	0.0019	0.0000	0.0032	0.0000	0.0000	0.0000	0.0000	0.0000	0.0000	0.0000	0.0000	0.0000	0.0010	0.0013	0.0015	0.0000	0.0012	0.0029	0.0673	0.0000	0.0000	0.0000	0.0000	0.0000	0.0000	0.0000	0.0000
OTU_1609	G_Metarhizium	0.0000	0.0009	0.0000	0.0000	0.0000	0.0000	0.0000	0.0000	0.0000	0.0000	0.0000	0.0000	0.0000	0.0000	0.0000	0.0000	0.0000	0.0000	0.0000	0.0030	0.0000	0.0000	0.0000	0.0523	0.0000	0.0000	0.0000	0.0000	0.0000	0.0000	0.0000	0.0000
OTU_1610	P_Basidiomycota	0.0000	0.0000	0.0000	0.0000	0.0000	0.0000	0.0000	0.0000	0.0000	0.0000	0.0000	0.0000	0.0000	0.0000	0.0000	0.0000	0.0055	0.0010	0.0512	0.0938	0.0015	0.0025	0.0015	0.0793	0.0000	0.0000	0.0000	0.0000	0.0000	0.0000	0.0000	0.0000
OTU_1611	D_Fungi	0.0000	0.0000	0.0000	0.0000	0.0000	0.0000	0.0000	0.0011	0.0000	0.0000	0.0000	0.0000	0.0000	0.0000	0.0000	0.0000	0.0000	0.0000	0.0000	0.0015	0.0000	0.0000	0.0000	0.0718	0.0000	0.0000	0.0000	0.0000	0.0000	0.0000	0.0000	0.0000
OTU_1612	G_Chloridium	0.0000	0.0000	0.0000	0.0000	0.0000	0.0000	0.0000	0.0000	0.0000	0.0000	0.0000	0.0000	0.0000	0.0000	0.0000	0.0000	0.0000	0.0000	0.0000	0.0223	0.0000	0.0000	0.0000	0.0165	0.0000	0.0000	0.0000	0.0000	0.0000	0.0000	0.0000	0.0000
OTU_1613	G_Schizothecium	0.0000	0.0000	0.0000	0.0000	0.0000	0.0000	0.0000	0.0000	0.0000	0.0000	0.0000	0.0000	0.0000	0.0000	0.0000	0.0000	0.0000	0.0000	0.0000	0.0000	0.0000	0.0000	0.0000	0.0075	0.0000	0.0000	0.0000	0.0000	0.0000	0.0000	0.0000	0.0000
OTU_1614	D_Fungi	0.0000	0.0000	0.0000	0.0000	0.0000	0.0000	0.0000	0.0000	0.0000	0.0000	0.0000	0.0000	0.0000	0.0000	0.0000	0.0000	0.0000	0.0020	0.0000	0.0000	0.0000	0.0000	0.0000	0.0060	0.0000	0.0000	0.0000	0.0000	0.0000	0.0000	0.0000	0.0000
OTU_1615	D_Fungi	0.0000	0.0000	0.0000	0.0000	0.0000	0.0000	0.0000	0.0000	0.0000	0.0000	0.0000	0.0000	0.0000	0.0000	0.0000	0.0000	0.0000	0.0010	0.0000	0.0000	0.0000	0.0000	0.0000	0.0060	0.0000	0.0000	0.0000	0.0000	0.0000	0.0000	0.0000	0.0000
OTU_1616	G_Glomus	0.0000	0.0000	0.0000	0.0000	0.0000	0.0000	0.0000	0.0000	0.0000	0.0000	0.0000	0.0000	0.0000	0.0000	0.0000	0.0000	0.0000	0.0000	0.0000	0.0000	0.0000	0.0000	0.0015	0.0105	0.0000	0.0000	0.0000	0.0000	0.0000	0.0000	0.0000	0.0000
OTU_1617	P_Ascomycota	0.0000	0.0000	0.0000	0.0000	0.0000	0.0000	0.0017	0.0000	0.0000	0.0000	0.0000	0.0027	0.0000	0.0000	0.0009	0.0000	0.0000	0.0000	0.0000	0.0000	0.0000	0.0000	0.0015	0.0105	0.0000	0.0000	0.0000	0.0000	0.0000	0.0000	0.0000	0.0000
OTU_1618	D_Fungi	0.0000	0.0000	0.0000	0.0000	0.0000	0.0000	0.0000	0.0000	0.0000	0.0000	0.0000	0.0000	0.0000	0.0000	0.0000	0.0000	0.0000	0.0000	0.0337	0.0060	0.0000	0.0000	0.0029	0.0105	0.0000	0.0000	0.0000	0.0000	0.0000	0.0000	0.0000	0.0000
OTU_1619	D_Fungi	0.0000	0.0000	0.0000	0.0000	0.0000	0.0000	0.0000	0.0011	0.0000	0.0025	0.0000	0.0000	0.0000	0.0012	0.0000	0.0000	0.0000	0.0000	0.0000	0.0060	0.0000	0.0000	0.0000	0.0120	0.0000	0.0000	0.0000	0.0000	0.0000	0.0000	0.0000	0.0000
OTU_1620	P_Ascomycota	0.0000	0.0000	0.0000	0.0000	0.0000	0.0000	0.0000	0.0000	0.0000	0.0000	0.0000	0.0000	0.0000	0.0000	0.0000	0.0000	0.0000	0.0000	0.0000	0.0000	0.0000	0.0000	0.0015	0.0105	0.0000	0.0000	0.0000	0.0000	0.0000	0.0000	0.0000	0.0000
OTU_1621	F_Ceratostomataceae	0.0000	0.0000	0.0000	0.0000	0.0000	0.0000	0.0000	0.0000	0.0000	0.0000	0.0000	0.0000	0.0000	0.0000	0.0000	0.0000	0.0000	0.0000	0.0000	0.0000	0.0000	0.0000	0.0000	0.0239	0.0000	0.0000	0.0000	0.0000	0.0000	0.0059	0.0000	0.0076
[truncated: 379 more rows]
